# Supplementary material
Source: PubMed Central journal article supplement (PMC5835364)
Supplement: NIHMS944793-supplement-Supplimental_Information.pdf [file NIHMS944793-supplement-Supplimental_Information.pdf]

# Supporting Information

for

## **Enantioselective Synthesis of $\alpha$ -(Hetero)aryl Piperidines Through Asymmetric Hydrogenation of Pyridinium Salts and Its Mechanistic Insights**

Bo Qu,\* Hari P. R. Mangunuru, Sergei Tcyrulnikov, Daniel Rivalti, Olga V. Zatolochnaya, Dmitry Kurouski, Suttipol Radomkit, Soumik Biswas, Shuklendu Karyakarte, Keith R. Fandrick, Joshua D. Sieber, Sonia Rodriguez, Jean-Nicolas Desrosiers, Nizar Haddad, Keith McKellop, Scott Pennino, Heewon Lee, Nathan K. Yee, Jinhua J. Song, Marisa C. Kozlowski\* and Chris H. Senanayake

*Chemical Development, Boehringer Ingelheim Pharmaceuticals, Inc. 900 Ridgebury Road, Ridgefield, CT 06877 USA*

*Department of Chemistry, University of Pennsylvania, Philadelphia, PA 19104, USA*

### **Table of Contents**

|   |                                                                        |     |
|---|------------------------------------------------------------------------|-----|
| 1 | General Information                                                    | S2  |
| 2 | General Procedure for the Syntheses of Pyridinium Salts                | S3  |
| 3 | General Procedure for the Asymmetric Hydrogenation of Pyridinium Salts | S12 |
| 4 | NMR Spectra                                                            | S21 |
| 5 | Chiral HPLC Data                                                       | S65 |
| 6 | Proposed Generation of the Ir-H Species                                | S84 |
| 7 | DFT calculation Data                                                   | S85 |

## General Information

All reactions for the preparation of substrates and catalysts were performed in standard, dry glassware under an inert atmosphere of nitrogen or argon unless otherwise described. All starting materials and reagents were purchased from commercial sources and used as received unless otherwise noted. 2-(4-methyl-3-thienyl)pyridine, 2-(2,5-dimethyl-3-thienyl)pyridine, 2-(2-bromophenyl)pyridine, 2-(2,4-difluorophenyl)pyridine, 2-(2-(trifluoromethyl)phenyl)pyridine, 2-(2,4-dimethylphenyl)pyridine were purchased and used as received. Palladium catalysts and [Ir(COD)Cl]<sub>2</sub> were purchased from Aldrich or Strem and used as received. Ligand (*S,S*)-BoQPhos<sup>1</sup> and pyridinium salts **1h**<sup>2</sup> and **1r**<sup>2</sup> were prepared according to the reported procedures. <sup>1</sup>H and <sup>13</sup>C NMR spectra were recorded using 400 or 500 MHz spectrometers. Chemical shifts (δ) are given in ppm, and coupling constants (*J*) are given in Hz. The 7.26 resonance of residual CHCl<sub>3</sub> (or 0 ppm of TMS) for proton spectra and the 77.23 ppm resonance of CDCl<sub>3</sub> for carbon spectra were used as internal references. Chiral HPLC analyses (normal phase) were conducted on Waters Aquity SFC system or Agilent SFC system. UPLC-MS analyses were conducted on a Waters Acquity Ultra Performance LC system. Flash chromatography was performed on a Combi-Flash automated system with EMD 230-400 mesh silica gel columns. High resolution mass spectrometric data were obtained on an Agilent 6210 time-of-flight HPLC/MS spectrometer (ESI-TOF).

---

<sup>1</sup> B. Qu, L. P. Samankumara, J. Savoie, D. R. Fandrick, N. Haddad, X. Wei, S. Ma, H. Lee, S. Rodriguez, C. A. Busacca, N. K. Yee, J. J. Song, C. H. Senanayake, *J. Org. Chem.* **2014**, *79*, 993–1000.

<sup>2</sup> M. Chang, Y. Huang, S. Liu, Y. Chen, S. W. Krska, I. W. Davies, X. Zhang, *Angew. Chem., Int. Ed.* **2014**, *53*, 12761–12764.

### General procedure for the synthesis of pyridinium salts (except compounds **1f** and **1s**)

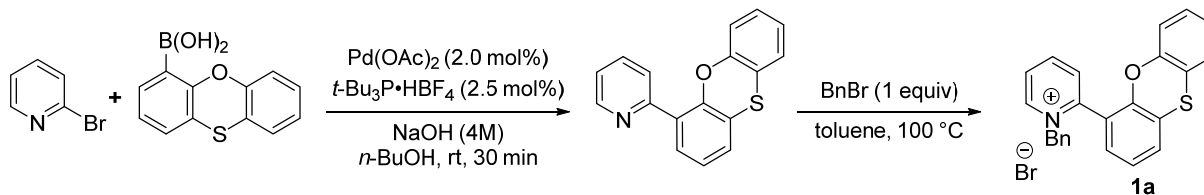

To a three-neck-flask under  $\text{N}_2$  charge phenoxathiin-4-ylboronic acid (2.92 g, 12.0 mmol, 1.2 equiv),  $n\text{-BuOH}$  (15.0 mL) and 2-bromopyridine (1.58 g, 10.0 mmol). The mixture was sparged with Ar for 15 min; then degassed sodium hydroxide aqueous solution (5 mL, 4 M, 2.0 equiv) was slowly added. To this mixture add  $\text{Pd}(\text{OAc})_2$  (46 mg, 0.2 mmol) and tri-*tert*-butylphosphonium tetrafluoroborate (62 mg, 0.25 mmol). The resulting reaction mixture was stirred at room temperature for 0.5 – 4 h. The reaction progress was monitored by UPLC. Upon completion, the reaction was stopped with addition of water (10 mL). Crude mixture was extracted with ethyl acetate, dried over sodium sulfate, filtered, and concentrated. The crude mixture was submitted to silica gel chromatography (eluent: 20% ethyl acetate in hexanes) to afford the product 2-(phenoxathiin-4-yl)pyridine as pale yellow oil (2.72 g, 9.8 mmol, 98% yield).  $^1\text{H}$  NMR (500 MHz,  $\text{CDCl}_3$ )  $\delta$  8.73 (d,  $J = 4.6$  Hz, 1H), 7.87-7.83 (m, 1H), 7.78 (dt,  $J = 7.7$  Hz, 1.8 Hz, 1H), 7.61 (dd,  $J = 7.6$  Hz, 1.6 Hz, 1H), 7.30-7.26 (m, 1H), 7.20-7.08 (m, 4H), 7.05-7.00 (m, 1H), 6.91 (dd,  $J = 8.1$  Hz, 0.8 Hz, 1H);  $^{13}\text{C}$  NMR (125 MHz,  $\text{CDCl}_3$ )  $\delta$  154.8, 152.4, 149.8, 149.7, 135.7, 130.2, 129.7, 127.7, 127.4, 126.9, 125.3, 124.8, 124.5, 122.2, 121.5, 121.2, 117.8.

To a solution of 2-(phenoxathiin-4-yl)pyridine (1.25 g, 4.5 mmol) in toluene (4.5 mL) was added benzyl bromide (765 mg, 4.5 mmol) in one portion, and the resulting mixture was heated at 100 °C for 14 h. Toluene was removed under reduced pressure, the product was purified by silica gel chromatography (eluent: DCM to 10% MeOH in DCM) to afford the product **1a** as pale brown solid (1.65 g, 3.46 mmol, 77% yield).  $^1\text{H}$  NMR (500 MHz,  $\text{DMSO-}d_6$ )  $\delta$  9.53 (d,  $J = 6.1$  Hz, 1H), 8.81 (t,  $J = 7.7$  Hz, 1H), 8.38 (t,  $J = 6.6$  Hz, 1H), 8.25 (d,  $J = 7.7$  Hz, 1H), 7.53 (d,  $J = 7.8$  Hz, 1H), 7.46 (dd,  $J = 7.7$  Hz, 0.9 Hz, 1H), 7.3 (d,  $J = 7.3$  Hz, 1H), 7.23 (dd,  $J = 7.1$  Hz, 2.1 Hz, 1H), 7.15-7.05 (m, 5H), 6.88 (d,  $J = 7.2$  Hz, 2H), 6.63-6.60 (m, 1H), 5.81 (q,  $J = 13.3$  Hz, 2H);  $^{13}\text{C}$  NMR (125 MHz,  $\text{DMSO-}d_6$ )  $\delta$  151.0, 150.3, 148.4, 147.7, 146.9,

133.5, 132.2, 130.5, 129.1, 129.04, 128.96, 128.7, 128.5, 128.2, 127.3, 126.1, 125.6, 121.5, 121.1, 118.4, 118.3, 62.2. HRMS (ESI)  $[M]^+$   $m/z$  calcd for  $[C_{24}H_{18}NOS]^+$  is 368.1104, found 368.1100.

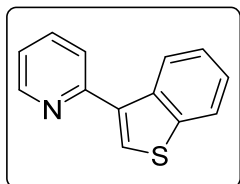

**2-(benzo[b]thiophen-3-yl)pyridine:** colorless oil, 2.06 g, 9.8 mmol, 98% yield (starting from 10.0 mmol 2-bromopyridine);  $^1H$  NMR (400 MHz,  $CDCl_3$ )  $\delta$  8.74 (d,  $J = 4.6$  Hz, 1H), 8.45 (d,  $J = 8.0$  Hz, 1H), 7.90 (d,  $J = 7.5$  Hz, 1H), 7.79-7.74 (m, 2H), 7.67 (d,  $J = 8.0$  Hz, 1H), 7.46-7.37 (m, 2H), 7.27-7.24 (m, 1H);  $^{13}C$  NMR (100 MHz,  $CDCl_3$ )  $\delta$  154.6, 149.7, 140.9, 137.3, 136.7, 136.6, 126.4, 124.7, 124.6, 124.1, 122.7, 122.6, 122.0. HRMS (ESI)  $[M+H]^+$   $m/z$  calcd for  $[C_{13}H_{10}NS]^+$  is 212.0528, found 212.0525.

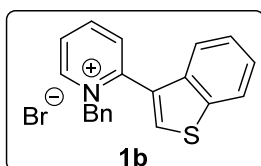

**2-(benzo[b]thiophen-3-yl)-1-benzylpyridinium bromide (1b)**

White solid, 1.12 g, 2.93 mmol, 64% yield (starting from 4.5 mmol 2-(benzo[b]thiophen-3-yl)pyridine);  $^1H$  NMR (400 MHz,  $CDCl_3$ )  $\delta$  9.90 (d,  $J = 6.3$  Hz, 1H), 8.72-8.67 (m, 1H), 8.27-8.23 (m, 2H), 7.95 (d,  $J = 8.1$  Hz, 1H), 7.48-7.29 (m, 3H), 7.18-7.10 (m, 3H), 6.96-6.94 (m, 2H), 6.25 (br s, 1H), 5.97 (br s, 1H);  $^{13}C$  NMR (100 MHz,  $CDCl_3$ )  $\delta$  150.4, 148.1, 145.9, 139.7, 136.7, 132.8, 132.5, 131.1, 129.3, 129.2, 128.5, 127.9, 126.0, 125.9, 123.1, 121.5, 62.8. HRMS (ESI)  $[M]^+$   $m/z$  calcd for  $[C_{20}H_{16}NS]^+$  is 302.0998, found 302.0995.

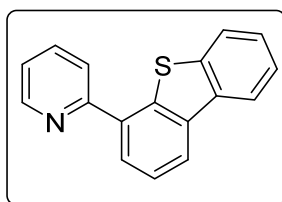

**2-(dibenzo[b,d]thiophen-4-yl)pyridine:** yellow solid, 1.93 mg, 7.4 mmol, 74% yield (starting from 10.0 mmol 2-bromopyridine);  $^1H$  NMR (500 MHz,  $CDCl_3$ )  $\delta$  8.87 (d,  $J = 4.7$  Hz, 1H), 8.25 (dd,  $J = 7.8, 1.1$  Hz, 1H), 8.20-8.18 (m, 1H), 8.00 (d,  $J = 7.6$  Hz, 1H), 7.97 (d,  $J = 8.3$  Hz, 1H), 7.94-7.90 (m, 1H), 7.82 (dt,  $J = 7.6, 1.5$  Hz, 1H), 7.59 (t,  $J = 7.7$  Hz, 1H), 7.50-7.44 (m, 2H), 7.30 (ddd,  $J = 4.9, 1.1$  Hz, 1H);  $^{13}C$  NMR (125 MHz,  $CDCl_3$ )  $\delta$  156.4, 148.7, 142.2, 137.9, 137.5, 134.9, 133.6, 129.9, 125.2, 124.8, 124.3, 122.7, 122.4, 122.3, 121.6, 121.1; HRMS (ESI)  $[M+H]^+$   $m/z$  calcd for  $[C_{17}H_{12}NS]^+$  is 262.0685, found 262.0684.

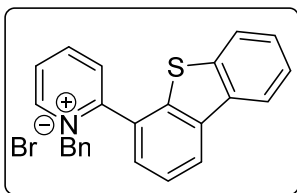

**1-benzyl-2-(dibenzo[b,d]thiophen-4-yl)pyridinium bromide (1c)**

Light brown foamy solid, 1.44 g, 3.3 mmol, 74% yield (starting from 4.5 mmol 2-(dibenzo[b,d]thiophen-4-yl)pyridine);  $^1\text{H}$  NMR (400 MHz,  $\text{CDCl}_3$ )  $\delta$  9.99 (d,  $J = 6.2$  Hz, 1H), 8.62 (td,  $J = 7.7, 1.4$  Hz, 1H), 8.39 (dd,  $J = 8.0, 0.9$  Hz, 1H), 8.29-8.13 (m, 1H), 8.01 (dd,  $J = 7.8, 1.6$  Hz, 1H), 7.86 (dd,  $J = 7.5, 1.2$  Hz, 1H), 7.81 (m, 1H), 7.70 (d,  $J = 7.8$  Hz, 1H), 7.56 (m, 2H), 7.20-7.12 (m, 3H), 7.05 (m, 2H), 6.21 (d,  $J = 13.8$  Hz, 1H), 6.00 (d,  $J = 13.8$  Hz, 1H);  $^{13}\text{C}$  NMR (100 MHz,  $\text{CDCl}_3$ )  $\delta$  153.7, 148.4, 145.9, 139.3, 138.8, 137.3, 134.9, 132.6, 130.2, 129.7, 129.5, 129.3, 128.7, 128.5, 128.3, 125.7, 124.7, 123.1, 122.5, 62.7; HRMS (ESI)  $[\text{M}]^+$   $m/z$  calcd for  $[\text{C}_{24}\text{H}_{18}\text{NS}]^+$  is 352.1154, found 352.1151.

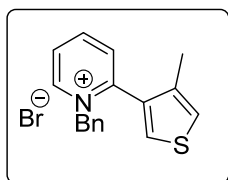

**1-benzyl-2-(4-methylthiophen-3-yl)pyridinium bromide (1d)**

Light red hygroscopic solid, 1.04 g, 3.02 mmol, 67% yield (starting from 4.5 mmol 2-(4-methylthiophen-3-yl)pyridine);  $^1\text{H}$  NMR (400 MHz,  $\text{CDCl}_3$ ):  $\delta$  10.03 (d,  $J = 6.0$  Hz, 1H), 8.67 (t,  $J = 7.8$  Hz, 1H), 8.23 (t,  $J = 7.5$  Hz, 1H), 7.92 (d,  $J = 3.1$  Hz, 1H), 7.77 (d,  $J = 7.8$  Hz, 1H), 7.12-7.31 (m, 4H), 6.98-7.00 (m, 2H), 6.08 (s, 2H), 1.76 (s, 3H);  $^{13}\text{C}$  NMR (100 MHz,  $\text{CDCl}_3$ ):  $\delta$  151.7, 148.4, 145.7, 136.4, 132.9, 131.6, 130.8, 129.8, 129.6, 129.4, 128.7, 127.9, 62.9, 14.3; HRMS (ESI)  $[\text{M}]^+$   $m/z$  calcd for  $[\text{C}_{17}\text{H}_{16}\text{NS}]^+$  is 266.0998, found 266.0996.

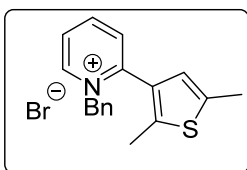

**1-benzyl-2-(2,5-dimethylthiophen-3-yl)pyridinium bromide (1e)**

White solid, 1.34 g, 3.73 mmol, 83% yield (starting from 4.5 mmol 2-(2,5-dimethylthiophen-3-yl)pyridine);  $^1\text{H}$  NMR ( $\text{CDCl}_3$ , 500 MHz)  $\delta$  10.08 (d,  $J = 5.0$  Hz, 1H), 8.68 (t,  $J = 10.0$  Hz, 1H), 8.20 (t,  $J = 10.0$  Hz, 1H), 7.81 (d,  $J = 10.0$ , 1H), 7.31-7.24 (m, 3H), 7.01 (d,  $J = 5.0$  Hz, 2H), 6.81 (s, 1H), 6.10 (br s, 2H), 2.49 (s, 3H), 1.90 (s, 3H);  $^{13}\text{C}$  NMR ( $\text{CDCl}_3$ , 500 MHz) 151.4, 148.1, 146.0, 140.3, 139.7, 133.0, 130.8, 129.3, 129.1, 128.3, 127.6, 127.5, 124.8, 62.2, 15.1, 13.4. HRMS (ESI)  $[\text{M}]^+$   $m/z$  calcd for  $[\text{C}_{18}\text{H}_{18}\text{NS}]^+$  is 280.1154, found 280.1152.

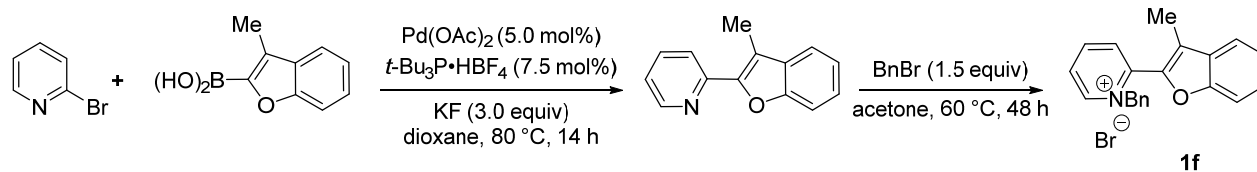

To a three-neck-flask under  $\text{N}_2$  charge (3-methylbenzofuran-2-yl)boronic acid (2.67 g, 15.2 mmol, 1.2 equiv), KF (2.2 g, 38.0 mmol, 3.0 equiv), degassed dioxane (50 mL), and 2-bromopyridine (2.0 g, 12.7 mmol, 1.0 equiv). The mixture was sparged with Ar for 15 min, before addition of tri-*tert*-butylphosphonium tetrafluoroborate (275 mg, 0.95 mmol) and  $\text{Pd}(\text{OAc})_2$  (142 mg, 0.63 mmol). The reaction mixture was stirred at 80 °C for 14 h and monitored by LC/MS. Upon completion, the reaction was diluted with water (40 mL). The crude mixture was extracted with ethyl acetate (60 mL x 2), dried over sodium sulfate, filtered, and concentrated. The crude mixture was submitted to silica gel chromatography (eluent: hexanes to 10% ethyl acetate in hexanes) to afford the product as pale yellow solid (1.14 g, 5.44 mmol, 43% yield).  $^1\text{H}$  NMR (400 MHz,  $\text{CDCl}_3$ )  $\delta$  8.68 (d,  $J = 3.6$  Hz, 1H), 7.87 (d,  $J = 6.8$  Hz, 1H), 7.72 (td,  $J = 6.4, 1.2$  Hz, 1H), 7.58 (d,  $J = 6.0$  Hz, 1H), 7.50 (d,  $J = 6.4$  Hz, 1H), 7.34-7.30 (m, 1H), 7.26-7.23 (m, 1H), 7.17-7.14 (m, 1H), 2.71 (s, 3H);  $^{13}\text{C}$  NMR (100 MHz,  $\text{CDCl}_3$ )  $\delta$  154.0, 151.4, 149.6, 149.1, 136.4, 131.2, 125.3, 122.6, 121.9, 121.0, 120.1, 115.9, 111.3, 9.7.

To a solution of 2-(3-methylbenzofuran-2-yl)pyridine (400 mg, 1.91 mmol, 1.0 equiv) in acetone (1.0 mL) was added benzyl bromide (0.34 mL, 2.87 mmol, 1.5 equiv), and the resulting mixture was heated at 60 °C for 48 h. The reaction was filtered and volatiles were removed under reduced pressure, the crude mixture was purified by silica gel chromatography (eluent: DCM to 10% MeOH in DCM) to afford the product (**1f**) as light yellow solid (602 mg, 1.58 mmol, 83% yield).  $^1\text{H}$  NMR (400 MHz,  $\text{CDCl}_3$ )  $\delta$  10.3 (d,  $J = 6.0$  Hz, 1H), 8.77 (t,  $J = 8.0$  Hz, 1H), 8.26 (t,  $J = 7.0$  Hz, 1H), 8.09 (d,  $J = 7.6$  Hz, 1H), 7.60-7.49 (m, 3H), 7.38 (t,  $J = 7.4$  Hz, 1H), 7.24-7.20 (m, 1H), 7.17-7.09 (m, 4H), 6.32 (s, 2H), 2.21 (s, 3H);  $^{13}\text{C}$  NMR (100 MHz,  $\text{CDCl}_3$ )  $\delta$  154.4, 148.7, 146.7, 143.4, 139.8, 132.4, 131.5, 129.1, 128.7, 128.0, 127.9, 127.74, 127.71, 123.9, 123.0, 120.8, 111.5, 62.6, 8.7; HRMS (ESI)  $[\text{M}]^+$   $m/z$  calcd for  $[\text{C}_{21}\text{H}_{18}\text{NO}]^+$  is 300.1383, found 300.1383.

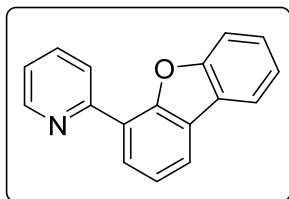

**2-(dibenzo[b,d]furan-4-yl)pyridine:** white solid, 1.70 g, 6.9 mmol, 69%

yield (starting from 10.0 mmol 2-bromopyridine);  $^1\text{H}$  NMR (500 MHz,  $\text{CDCl}_3$ )

$\delta$  8.79 (d,  $J = 4.4$  Hz, 1H), 8.42 (d,  $J = 7.9$  Hz, 1H), 8.28 (d,  $J = 7.8$  Hz, 1H),

8.00 (t,  $J = 6.9$  Hz, 2H), 7.87 (t,  $J = 6.9$  Hz, 1H), 7.64 (d,  $J = 8.4$  Hz, 1H),

7.51-7.46 (m, 2H), 7.37 (t,  $J = 7.4$  Hz, 1H), 7.30 (dd,  $J = 7.6, 5.3$  Hz, 1H);  $^{13}\text{C}$  NMR (125 MHz,  $\text{CDCl}_3$ )  $\delta$

156.3, 154.0, 153.9, 150.0, 136.8, 127.5, 125.3, 124.47, 124.46, 124.2, 123.5, 123.2, 122.6, 121.4, 120.9,

112.0; HRMS (ESI)  $[\text{M}+\text{H}]^+$   $m/z$  calcd for  $[\text{C}_{17}\text{H}_{12}\text{NO}]^+$  is 246.0913, found 246.0913.

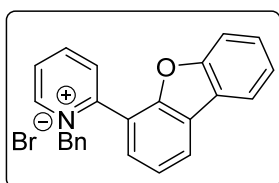

**1-benzyl-2-(dibenzo[b,d]furan-4-yl)pyridinium bromide (1g)**

White solid, 1.33 g, 3.2 mmol, 71% yield (starting from 4.5 mmol 2-

(dibenzo[b,d]furan-4-yl)pyridine);  $^1\text{H}$  NMR (500 MHz,  $\text{CDCl}_3$ )  $\delta$  10.26 (d,  $J =$

6.0 Hz, 1H), 8.66 (t,  $J = 7.8$  Hz, 1H), 8.29 (t,  $J = 6.9$  Hz, 1H), 8.19 (d,  $J = 8.2$  Hz, 1H), 8.01 (d,  $J = 7.8$

Hz, 1H), 7.99 (d,  $J = 7.8$  Hz, 1H), 7.61 (d,  $J = 7.6$  Hz, 1H), 7.55-7.50 (m, 2H), 7.48 (m, 1H), 7.43 (t,  $J =$

7.1 Hz, 1H), 7.09 (m, 3H), 6.94 (d,  $J = 6.9$  Hz, 2H), 6.13 (br s, 2H);  $^{13}\text{C}$  NMR (125 MHz,  $\text{CDCl}_3$ )  $\delta$  156.4,

152.4, 151.2, 148.6, 145.9, 132.7, 131.2, 129.5, 129.2, 128.89, 128.86, 128.5, 128.2, 125.9, 124.7, 124.2,

124.0, 123.0, 121.4, 115.6, 112.3, 62.9; HRMS (ESI)  $[\text{M}]^+$   $m/z$  calcd for  $[\text{C}_{24}\text{H}_{18}\text{NO}]^+$  is 336.1383, found

336.1379.

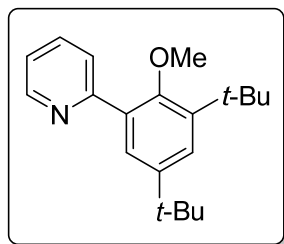

**2-(3,5-di-tert-butyl-2-methoxyphenyl)pyridine:** white solid, 2.68 g, 9.0

mmol, 90% yield (starting from 10.0 mmol 2-bromopyridine);  $^1\text{H}$  NMR (400

Hz,  $\text{CDCl}_3$ ) 8.73 (d,  $J = 3.7$  Hz, 1H), 7.75-7.68 (m, 2H), 7.45 (d,  $J = 1.8$  Hz,

1H), 7.39 (d,  $J = 1.84$  Hz, 1H), 7.23-7.20 (m, 1H), 3.30 (s, 3H), 1.44 (s, 9H),

1.34 (s, 9H);  $^{13}\text{C}$  NMR (100 Hz,  $\text{CDCl}_3$ )  $\delta$  158.4, 155.5, 149.7, 145.5, 141.9, 136.0, 133.3, 126.4, 124.8,

124.6, 121.6, 61.3, 35.3, 34.6, 31.5, 30.9. HRMS (ESI)  $[\text{M}+\text{H}]^+$   $m/z$  calcd for  $[\text{C}_{20}\text{H}_{28}\text{NO}]^+$  is 298.2165,

found 298.2163.

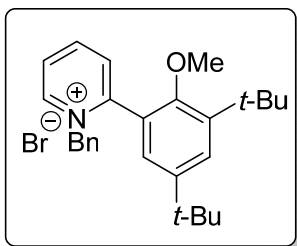

**1-benzyl-2-(3,5-di-tert-butyl-2-methoxyphenyl)pyridinium bromide (1i)**

White solid, 1.52 g, 3.24 mmol, 72% yield (starting from 4.5 mmol 2-(3,5-di-tert-butyl-2-methoxyphenyl)pyridine);  $^1\text{H}$  NMR (400 MHz,  $\text{CDCl}_3$ )  $\delta$  10.55 (d,  $J = 5.4$  Hz, 1H), 8.84-8.80 (m, 1H), 8.31-8.27 (m, 1H), 7.86 (dd,  $J = 7.8, 1.4$  Hz, 1H), 7.60 (d,  $J = 2.44$  Hz, 1H), 7.20-7.11 (m, 3H), 6.78 (d,  $J = 7.3$  Hz, 1H), 6.73 (d,  $J = 2.44$  Hz, 1H), 6.46 (d,  $J = 14.4$  Hz, 1H), 5.73 (d,  $J = 14.4$  Hz, 1H), 3.30 (s, 3H), 1.47 (s, 9H), 1.20 (s, 9H);  $^{13}\text{C}$  NMR (100 MHz,  $\text{CDCl}_3$ )  $\delta$  154.5, 153.9, 148.4, 147.8, 146.4, 143.9, 132.9, 130.8, 129.2, 128.9, 128.4, 128.3, 127.7, 126.3, 125.1, 62.7, 62.2, 35.6, 34.7, 31.2, 30.7. HRMS (ESI)  $[\text{M}]^+$   $m/z$  calcd for  $[\text{C}_{27}\text{H}_{34}\text{NO}]^+$  is 388.2635, found 388.2631.

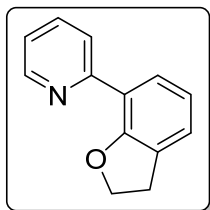

**2-(2,3-dihydrobenzofuran-7-yl)pyridine:** pale brown oil, 1.60 g, 8.1 mmol, 81%

yield (starting from 10.0 mmol 2-bromopyridine);  $^1\text{H}$  NMR (400 MHz,  $\text{CDCl}_3$ ):  $\delta$  8.69 (m, 1H), 8.06 (d,  $J = 8.0$  Hz, 1H), 7.91 (d,  $J = 7.9$  Hz, 1H), 7.71 (dt,  $J = 7.8, 1.7$  Hz, 1H), 7.23 (d,  $J = 7.7$  Hz, 1H), 7.17 (m, 1H), 6.98 (1H,  $J = 7.6$  Hz, 1H), 4.67 (t,  $J = 8.7$  Hz, 2H), 3.27 (t,  $J = 8.8$  Hz, 2H).  $^{13}\text{C}$  NMR (100 MHz,  $\text{CDCl}_3$ ):  $\delta$  157.8, 154.8, 149.4, 136.3, 128.1, 127.9, 125.5, 123.7, 122.2, 121.7, 120.9, 71.4, 29.4; HRMS (ESI)  $[\text{M}+\text{H}]^+$   $m/z$  calcd for  $[\text{C}_{13}\text{H}_{12}\text{NO}]^+$  is 198.0913, found 198.0912.

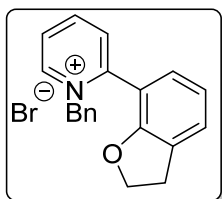

**1-benzyl-2-(2,3-dihydrobenzofuran-7-yl)pyridinium bromide (1j)**

Light brown hygroscopic solid, 773 mg, 2.1 mmol, 35% yield (starting from 6.0 mmol 2-(2,3-dihydrobenzofuran-7-yl)pyridine);  $^1\text{H}$  NMR (400 MHz,  $\text{CDCl}_3$ ):  $\delta$  10.13 (d,  $J = 5.9$  Hz, 1H), 8.52 (td,  $J = 7.8, 1.2$  Hz, 1H), 8.14 (t,  $J = 7.7$  Hz, 1H), 7.82 (dd,  $J = 7.8, 1.3$  Hz, 1H), 7.45 (d,  $J = 7.9$  Hz, 1H), 7.21-7.29 (m, 3H), 7.00-7.16 (m, 4H), 6.10 (s, 2H), 4.58 (t,  $J = 8.7$  Hz, 2H), 3.33 (t,  $J = 8.7$  Hz, 2H);  $^{13}\text{C}$  NMR (100 MHz,  $\text{CDCl}_3$ ):  $\delta$  157.0, 152.4, 147.9, 145.2, 133.0, 130.7, 129.3, 129.1, 128.9, 128.8, 128.8, 128.5, 127.5, 121.8, 113.3, 72.4, 62.2, 29.4; HRMS (ESI)  $[\text{M}]^+$   $m/z$  calcd for  $[\text{C}_{20}\text{H}_{18}\text{NO}]^+$  is 287.1310, found 287.1309.



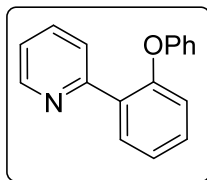

**2-(2-phenoxyphenyl)pyridine:** pale yellow oil, 2.40 g, 9.97 mmol, 97% yield (starting from 10.0 mmol 2-bromopyridine);  $^1\text{H}$  NMR (500 MHz,  $\text{CDCl}_3$ )  $\delta$  8.67 (d,  $J$  = 4.5 Hz, 1H), 7.93 (d,  $J$  = 7.7 Hz, 1H), 7.83 (d,  $J$  = 8.1 Hz, 1H), 7.60 (dt,  $J$  = 7.7 Hz, 1.7 Hz, 1H), 7.36-7.31 (m, 1H), 7.28-7.22 (m, 3H), 7.16-7.12 (m, 1H), 7.04-6.98 (m, 2H), 6.95 (d,  $J$  = 8.1 Hz, 2H);  $^{13}\text{C}$  NMR (125 MHz,  $\text{CDCl}_3$ )  $\delta$  157.5, 155.2, 154.1, 149.6, 135.9, 132.1, 131.5, 130.0, 129.7, 124.8, 124.3, 122.9, 122.0, 120.1, 118.2.

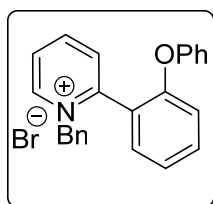

**1-benzyl-2-(2-phenoxyphenyl)pyridinium bromide (1k)**  
Pale red solid, 1.34 g, 3.2 mmol, 71% yield (starting from 4.5 mmol 2-(2-phenoxyphenyl)pyridine);  $^1\text{H}$  NMR (400 MHz,  $\text{DMSO-D}_6$ )  $\delta$  9.44 (d,  $J$  = 6.0 Hz, 1H), 8.73 (t,  $J$  = 7.4 Hz, 1H), 8.30-8.25 (m, 2H), 7.64-7.58 (m, 2H), 7.40-7.34 (m, 3H), 7.33-7.28 (m, 3H), 7.20 (t,  $J$  = 7.4 Hz, 1H), 6.96 (d,  $J$  = 7.4 Hz, 2H), 6.91 (d,  $J$  = 7.9 Hz, 2H), 6.84 (d,  $J$  = 8.4 Hz, 1H), 5.94 (d,  $J$  = 14.9 Hz, 1H), 5.84 (d,  $J$  = 14.9 Hz, 1H);  $^{13}\text{C}$  NMR (125 MHz,  $\text{DMSO-D}_6$ )  $\delta$  154.93, 154.90, 152.3, 147.3, 146.8, 134.0, 133.8, 132.2, 131.4, 130.7, 129.3, 128.4, 128.3, 125.5, 123.8, 122.1, 121.4, 117.2, 61.9; HRMS (ESI)  $[\text{M}]^+$   $m/z$  calcd for  $[\text{C}_{24}\text{H}_{20}\text{NO}]^+$  is 338.1545, found 338.1536.

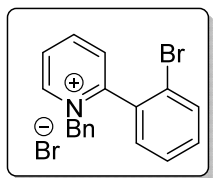

**1-benzyl-2-(2-bromophenyl)pyridinium bromide (1l)**  
Ash color solid, 1.05 g, 2.6 mmol, 58% yield (starting from 4.5 mmol 2-(2-bromophenyl)pyridine);  $^1\text{H}$  NMR (400 MHz,  $\text{CDCl}_3$ ):  $\delta$  9.85 (d,  $J$  = 6.3 Hz, 1H), 8.71 (t,  $J$  = 8.2 Hz, 1H), 8.25 (m, 1H), 7.85 (d,  $J$  = 7.5 Hz, 1H), 7.74 (m, 2H), 7.52 (m, 2H), 7.35-7.23 (m, 3H), 7.11 (m, 2H), 5.94 (s, 2H);  $^{13}\text{C}$  NMR (100 MHz,  $\text{CDCl}_3$ ):  $\delta$  153.8, 147.4, 146.1, 133.4, 133.2, 132.3, 132.0, 131.8, 130.9, 129.8, 129.52, 129.5, 129.4, 128.6, 128.3, 122.3, 62.7; HRMS (ESI)  $[\text{M}]^+$   $m/z$  calcd for  $[\text{C}_{18}\text{H}_{15}\text{NBr}]^+$  is 324.0382, found 324.0380.

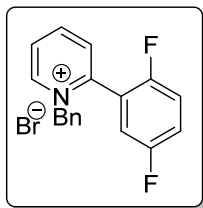

**1-benzyl-2-(2,5-difluorophenyl)pyridinium bromide (1m)**

White solid, 994 mg, 2.745 mmol, 61% yield (starting from 4.5 mmol 2-(2,5-difluorophenyl)pyridine);  $^1\text{H}$  NMR (500 MHz,  $\text{CDCl}_3$ ):  $\delta$  9.88 (d,  $J = 6.0$  Hz, 1H), 8.66 (t,  $J = 7.9$  Hz, 1H), 8.27 (t,  $J = 6.9$  Hz, 1H), 7.91 (d,  $J = 7.8$  Hz, 1H), 7.61 (m, 1H), 7.35-7.30 (m, 4H), 7.22 (dt,  $J = 9.0, 3.8$  Hz, 1H), 7.10 (d,  $J = 7.6$  Hz, 2H), 6.07 (d,  $J = 14.3$  Hz, 2H);  $^{13}\text{C}$  NMR (125 MHz,  $\text{CDCl}_3$ ):  $\delta$  159.7 (d,  $J = 2.2$  Hz), 157.8 (d,  $J = 2.5$  Hz), 155.9 (d,  $J = 2.5$  Hz), 153.9 (d,  $J = 2.8$  Hz), 148.7, 148.2, 146.2, 132.1, 131.1, 129.9, 129.6, 128.9, 128.8, 121.1 (dd,  $J = 24.4, 9.4$  Hz), 120.4 (dd,  $J = 17.6, 8.8$  Hz), 118.6 (dd,  $J = 26.4, 1.8$  Hz), 118.4 (dd,  $J = 23.7, 8.4$  Hz) 63.2; HRMS (ESI)  $[\text{M}]^+$   $m/z$  calcd for  $[\text{C}_{18}\text{H}_{14}\text{NF}_2]^+$  is 282.1086, found 282.1089.

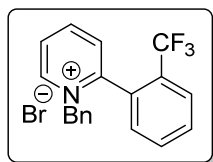

**1-benzyl-2-(2-(trifluoromethyl)phenyl)pyridinium bromide (1n)**

White solid, 1.10 g, 2.79 mmol, 62% yield (starting from 4.5 mmol 2-(2-(trifluoromethyl)phenyl)pyridine);  $^1\text{H}$  NMR (500 MHz,  $\text{CDCl}_3$ ):  $\delta$  9.18 (d,  $J = 6.3$  Hz, 1H), 8.50 (d,  $J = 7.7$  Hz, 1H), 8.33 (d,  $J = 8.5$  Hz, 1H), 8.10 (t,  $J = 7.3$  Hz, 1H), 7.89 (d,  $J = 7.5$  Hz, 1H), 7.81 (m, 3 H), 7.36 (m, 3H), 7.27 (m, 3H);  $^{13}\text{C}$  NMR (125 MHz,  $\text{CDCl}_3$ ):  $\delta$  152.1, 146.5, 145.1, 133.2, 132.5, 131.9, 131.0, 130.1, 130.07, 130.04, 129.5, 128.9 (q,  $J = 2.1$  Hz), 128.4 (q,  $J = 30.6$  Hz), 127.0 (d,  $J = 4.7$  Hz), 124.5 (q,  $J = 274.0$  Hz), 63.0; HRMS (ESI)  $[\text{M}]^+$   $m/z$  calcd for  $[\text{C}_{19}\text{H}_{15}\text{F}_3\text{N}]^+$  is 314.1151, found 314.1148.

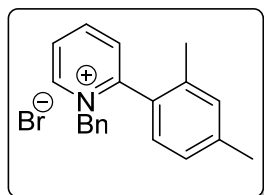

**1-benzyl-2-(2,4-dimethylphenyl)pyridinium bromide (1o)**

White solid, 1.45 g, 4.1 mmol, 91% yield (starting from 4.5 mmol 2-(2,4-dimethylphenyl)pyridine);  $^1\text{H}$  NMR (400 MHz,  $\text{CDCl}_3$ ):  $\delta$  10.17 (d,  $J = 6.0$  Hz, 1H), 8.54 (t,  $J = 7.7$  Hz, 1H), 8.18 (t,  $J = 6.9$  Hz, 1H), 7.73 (d,  $J = 7.7$  Hz, 1H), 7.31-7.38 (m, 5H), 7.16 (s, 1H), 7.03 (d,  $J = 7.4$  Hz, 2H), 6.07 (d,  $J = 13.9$  Hz, 1H), 5.98 (d,  $J = 13.9$  Hz, 1H), 2.43 (s, 3H), 1.84 (s, 3H);  $^{13}\text{C}$  NMR (100 MHz,  $\text{CDCl}_3$ ):  $\delta$  155.9, 148.3, 145.4, 142.4, 136.4, 132.7, 132.1, 130.2, 129.7, 129.4, 129.1, 128.0, 127.7, 127.6, 62.0, 21.6, 19.8; HRMS (ESI)  $[\text{M}]^+$   $m/z$  calcd for  $[\text{C}_{20}\text{H}_{20}\text{N}]^+$  is 274.1590, found 274.1588.

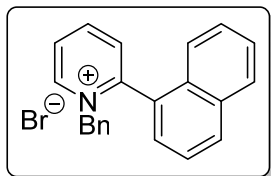

**1-benzyl-2-(naphthalen-1-yl)pyridinium bromide (1p)**

Pale brown solid, 0.93 g, 2.475 mmol, 55% yield (starting from 4.5 mmol 2-(naphthalen-1-yl)pyridine);  $^1\text{H}$  NMR ( $\text{CDCl}_3$ , 500 MHz)  $\delta$  10.09 (d,  $J = 5.0$  Hz, 1H), 8.75 (t,  $J = 10.0$  Hz, 1H), 8.32 (t,  $J = 5.0$  Hz, 1H), 8.12 (d,  $J = 5.0$  Hz, 1H), 7.99 (d,  $J = 5.0$  Hz, 1H), 7.94 (d,  $J = 10$  Hz, 1H), 7.63-7.49 (m, 4H), 7.19-7.09 (m, 4H), 6.89 (d,  $J = 10.0$  Hz, 2H), 5.93 (ABq,  $J = 10.0$  Hz,  $\Delta\nu_{\text{AB}} = 5.0$  Hz, 2H);  $^{13}\text{C}$  NMR ( $\text{CDCl}_3$ , 500 MHz)  $\delta$  154.6, 148.0, 145.9, 133.2, 132.6, 132.2, 131.0, 130.0, 129.4, 129.1, 129.0, 128.8, 128.0, 127.9, 127.4, 125.2, 123.7, 62.3. HRMS (ESI)  $[\text{M}]^+$   $m/z$  calcd for  $[\text{C}_{22}\text{H}_{18}\text{N}]^+$  is 296.1434, found 296.1431.

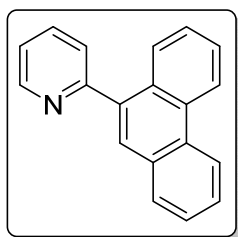

**2-(phenanthren-9-yl) pyridine:** white solid, 2.30 g, 9.0 mmol, 90% yield (starting

from 10.0 mmol 2-bromopyridine);  $^1\text{H}$  NMR (400 MHz,  $\text{CDCl}_3$ ):  $\delta$  8.83 (m, 1H), 8.78 (d,  $J = 8.3$  Hz, 1H), 8.73 (d,  $J = 7.7$  Hz, 1H), 8.08 (d,  $J = 8.3$  Hz, 1H), 7.94 (d,  $J = 8.3$  Hz, 1H), 7.86 (m, 2H), 7.72-7.67 (m, 2H), 7.66 (m, 1H), 7.64-7.61 (m, 1H), 7.60-7.56 (m, 1H) 7.37 (ddd,  $J = 4.9, 1.8$  Hz, 1H);  $^{13}\text{C}$  NMR (100 MHz,  $\text{CDCl}_3$ ):  $\delta$  159.6, 149.8, 137.4, 136.7, 131.6, 131.0, 130.7, 130.5, 129.2, 128.3, 127.2, 127.0, 126.8, 125.3, 123.1, 122.8, 122.4; HRMS (ESI)  $[\text{M}+\text{H}]^+$   $m/z$  calcd for  $[\text{C}_{19}\text{H}_{14}\text{N}]^+$  is 256.1121, found 256.1119.

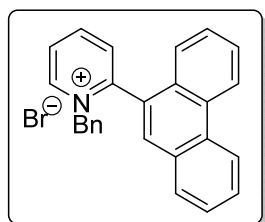

**1-benzyl-2-(phenanthren-9-yl)pyridinium bromide (1q)**

White solid, 1.55 g, 3.645 mmol, 81% yield (starting from 4.5 mmol 2-(phenanthren-9-yl) pyridine);  $^1\text{H}$  NMR (400 MHz,  $\text{CDCl}_3$ ):  $\delta$  10.08 (dd,  $J = 6.4$ , 1.2 Hz, 1H), 8.80 (d,  $J = 8.2$  Hz, 1H), 8.76 (d,  $J = 8.4$  Hz, 1H), 8.67 (td,  $J = 7.8$ , 1.4 Hz, 1H), 8.33 (td,  $J = 7.8$ , 1.4 Hz, 1H), 7.96 (dd,  $J = 7.9$ , 1.4 Hz, 1H), 7.93-7.89 (m, 2H), 7.83 (td,  $J = 7.3$ , 1.4 Hz, 1H), 7.75 (td,  $J = 7.3$ , 1.1 Hz, 1H), 7.70 (td,  $J = 7.0$ , 1.0 Hz, 1H), 7.58 (td,  $J = 7.0$ , 1.0 Hz, 1H), 7.22 (d,  $J = 8.2$  Hz, 1H), 7.17 (m, 1H), 7.08 (m, 2H), 6.95 (m, 2H), 6.13 (d,  $J = 14.0$  Hz, 1H), 5.77 (d,  $J = 15.0$  Hz, 1H);  $^{13}\text{C}$  NMR (100 MHz,  $\text{CDCl}_3$ ):  $\delta$  154.8, 148.4, 145.8, 132.9, 131.4, 131.2, 130.9, 130.6, 130.0, 129.9, 129.6, 129.5, 129.3, 129.1, 128.7, 128.6, 128.4, 128.3, 128.1, 127.0, 125.1, 123.8, 123.6, 62.5; HRMS (ESI)  $[\text{M}]^+$   $m/z$  calcd for  $[\text{C}_{26}\text{H}_{20}\text{N}]^+$  is 346.1590, found 346.1587.

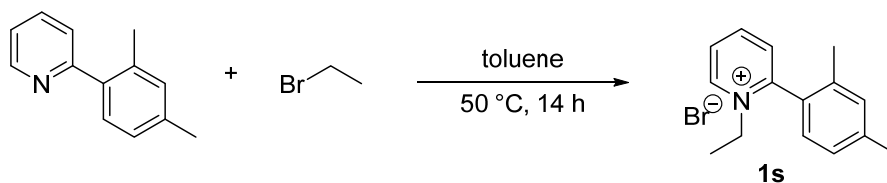

To a solution of 2-(2,4-dimethylphenyl)pyridine (1.0 g, 5.74 mmol, 1.0 equiv) in toluene (5 mL) was added ethyl bromide (1.2 ml, 16.4 mmol, 3.0 equiv), and the resulting mixture was heated at 50 °C for 14 h. Precipitates were resulted. At end of the reaction, 5 ml EtOAc was added. The product was collected by filtration, dried to yield the desired product **1s** as white solid, 0.97 g, 3.5 mmol, 61% yield. <sup>1</sup>H NMR (500 MHz, CDCl<sub>3</sub>): δ 10.27 (d, *J* = 6.1 Hz, 1H), 8.59 (td, *J* = 7.9 Hz, 1H), 8.25 (t, *J* = 7.0 Hz, 1H), 7.74 (dd, *J* = 7.9, 1.3 Hz, 1H), 7.20 (d, *J* = 10.6 Hz, 2H), 7.17 (s, 1H), 4.99 (dq, *J* = 7.4 Hz, 1H), 4.54 (dq, *J* = 7.4 Hz, 1H), 2.41 (s, 3H), 2.07 (s, 3H), 1.46 (t, *J* = 7.33 Hz, 3H); <sup>13</sup>C NMR (125 MHz, CDCl<sub>3</sub>): δ 155.4, 147.8, 145.4, 142.4, 135.7, 132.2, 130.0, 128.7, 128.3, 127.84, 127.8, 54.2, 21.6, 20.0, 17.1; HRMS (ESI) [M]<sup>+</sup> *m/z* calcd for [C<sub>15</sub>H<sub>18</sub>N]<sup>+</sup> is 212.1434, found 212.1433.

### General procedure for the asymmetric hydrogenation of pyridinium salts

A high pressure steel autoclave (HEL 100 mL) hydrogenation vessel was taken into the glove box. Catalyst solution was prepared in a vial with [Ir(COD)Cl]<sub>2</sub> (1 mol%) and ligand (*S,S*)-MeOBoQPhos (3 mol%), and stir for 15 min in THF (5 mL). Then I<sub>2</sub> (5 mol%) was added and stir for 1-2 min. Pyridinium salt (1 mmol) was added to the hydrogenation vessel and degassed THF (15 mL). The catalyst solution was then transferred to the vessel and parafilm before taking out of the glove box. The vessel was put onto the HEL hydrogenation autoclave reactor. The mixture was purged first purged with N<sub>2</sub> (3x) and then H<sub>2</sub> (3x) and stirred at the desired pressure and temperature for 20 h. Upon completion, the reactor was vented and purged with N<sub>2</sub> (2x). The mixture was added diethylamine (2 equiv). Percentage conversions and enantiomeric ratios were determined by chiral HPLC and SFC and the products were purified by silica gel (100% hexanes to 30% EtOAc/hexanes).

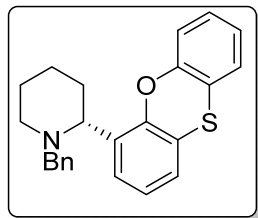

**1-benzyl-2-(phenoxathiin-4-yl)piperidine (2a)**

White solid, 343 mg, 0.92 mmol, 92% yield, er: 99.3:0.7;  $^1\text{H}$  NMR (500 MHz,  $\text{CDCl}_3$ )  $\delta$  7.59 (d,  $J = 7.9$  Hz, 1H), 7.25 (m, 4H), 7.21-7.15 (m, 3H), 7.10 (d,  $J = 7.9$  Hz, 1H), 7.05 (t,  $J = 7.8$  Hz, 2H), 7.01 (d,  $J = 7.5$  Hz, 1H), 3.87 (d,  $J = 10.1$  Hz, 1H), 3.80 (d,  $J = 13.3$  Hz, 1H), 3.02 (d,  $J = 11.2$  Hz, 1H), 2.90 (d,  $J = 13.3$  Hz, 1H), 2.02 (d,  $J = 11.6$  Hz, 1H), 1.86 (d,  $J = 13.6$  Hz, 1H), 1.81 (d,  $J = 13.6$  Hz, 1H), 1.68-1.59 (m, 2H), 1.55-1.42 (m, 2H);  $^{13}\text{C}$  NMR (125 MHz,  $\text{CDCl}_3$ )  $\delta$  152.9, 150.1, 139.7, 134.8, 128.9, 128.2, 127.8, 127.1, 126.8, 126.7, 125.2, 124.9, 121.8, 120.8, 118.1, 60.5, 60.0, 53.7, 35.7, 26.2, 25.4; Enantiomeric ratio was determined by SFC: Chiralpack IC-3, 4.6 mm x 150 mm, temperature: 30 °C, A:  $\text{CO}_2$ , B: denatured ethanol (contains 5% MeOH and 5% 2-propanol) with 0.2% of diethylamine; Isocratic: A/B:96.5/3.5, v/v, flow rate 3.0 mL/min. HRMS (ESI)  $[\text{M}+\text{H}]^+$  m/z calcd for  $[\text{C}_{24}\text{H}_{24}\text{NOS}]^+$  is 374.1573, found 374.1568.

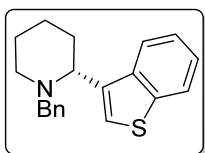

**2-(benzo[b]thiophen-3-yl)-1-benzylpiperidine (2b)**

White solid, 272 mg, 0.89 mmol, 89% yield, er: 96.6:3.4;  $^1\text{H}$  NMR (500 MHz,  $\text{CDCl}_3$ )  $\delta$  8.36 (d,  $J = 7.9$  Hz, 1H), 7.84 (d,  $J = 7.9$  Hz, 1H), 7.40 (m, 2H), 7.39 (m, 1H), 7.23-7.10 (m, 5H), 3.83 (d,  $J = 14.7$  Hz, 1H), 3.59 (dd,  $J = 11.8, 2.7$  Hz, 1H), 3.01 (m, 1H), 2.87 (d,  $J = 13.4$  Hz, 1H), 2.04-1.90 (m, 2H), 1.86-1.78 (m, 2H), 1.68-1.61 (m, 2H), 1.43 (m, 1H);  $^{13}\text{C}$  NMR (125 MHz,  $\text{CDCl}_3$ )  $\delta$  141.4, 140.2, 139.8, 138.0, 129.0, 128.2, 126.7, 124.5, 123.8, 123.0, 122.7, 64.6, 60.2, 53.8, 34.4, 26.2, 25.4; Enantiomeric ratio was determined by SFC: Lux Cellulose-3, 4.6 x 150 mm: 30 °C, A:  $\text{CO}_2$ , B: denatured ethanol (contains 5% MeOH and 5% 2-propanol) with 0.2% of diethylamine; Isocratic: A/B:97/3, v/v, flow rate 3.0 mL/min. HRMS (ESI)  $[\text{M}+\text{H}]^+$  m/z calcd for  $[\text{C}_{20}\text{H}_{22}\text{NS}]^+$  is 308.1467, found 308.1465.

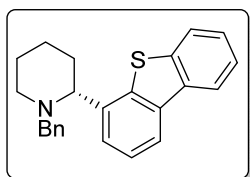

**1-benzyl-2-(dibenzo[b,d]thiophen-4-yl)piperidine (2c)**

White solid, 332 mg, 0.93 mmol, 93% yield, er: 95.1:4.9;  $^1\text{H}$  NMR (500 MHz,  $\text{CDCl}_3$ )  $\delta$  8.14 (m, 1H), 8.05 (d,  $J = 7.6$  Hz, 1H), 7.89 (d,  $J = 6.3, 1.9$  Hz, 1H), 7.57 (d,  $J = 7.2$  Hz, 1H), 7.46-7.41 (m, 3H), 7.30 (d,  $J = 7.3$  Hz, 2H), 7.30 (t,  $J = 7.6$  Hz, 2H), 7.30 (t,  $J = 7.1$

Hz, 1H), 3.80 (d,  $J = 13.5$  Hz, 1H), 3.45 (dd,  $J = 11.4, 2.8$  Hz, 1H), 3.06 (m, 1H), 2.94 (d,  $J = 13.8$  Hz, 1H), 1.99 (m, 2H), 1.83 (m, 2H), 1.73-1.62 (m, 2H), 1.47-1.37 (m, 1H);  $^{13}\text{C}$  NMR (125 MHz,  $\text{CDCl}_3$ )  $\delta$  140.4, 140.0, 139.1, 137.4, 136.7, 135.9, 129.4, 128.2, 126.8, 126.7, 125.6, 125.0, 124.3, 122.8, 121.6, 120.3, 68.9, 60.4, 53.3, 33.4, 26.0, 25.3; Enantiomeric ratio was determined by SFC: Chiracel OD-3, 4.6 x 150 mm: 30 °C, A:  $\text{CO}_2$ , B: Methanol with 0.2% of diethylamine (DEA); Isocratic: A/B: 90/10, v/v, flow rate 3.0 mL/min. HRMS (ESI)  $[\text{M}+\text{H}]^+$   $m/z$  calcd for  $[\text{C}_{24}\text{H}_{24}\text{NS}]^+$  is 358.1624, found 358.1622.

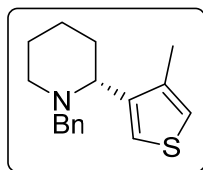

**1-benzyl-2-(4-methylthiophen-3-yl)piperidine (2d)**

Light brown solid, 192 mg, 0.71 mmol, 71% yield, er: 96.4:3.6;  $^1\text{H}$  NMR (500 MHz,  $\text{CDCl}_3$ )  $\delta$  7.17-7.28 (m, 6H), 6.87 (m, 1H), 3.84 (d,  $J = 13.5$  Hz, 1H), 3.24 (dd,  $J = 11.0, 2.9$  Hz, 1H), 2.98 (d,  $J = 11.6$  Hz, 1H), 2.87 (d,  $J = 13.4$  Hz, 1H), 2.30 (s, 3H), 1.95-1.89 (m, 1H), 1.79-1.73 (m, 2H), 1.69-1.55 (m, 3H), 1.39-1.31 (m, 1H);  $^{13}\text{C}$  NMR (125 MHz,  $\text{CDCl}_3$ )  $\delta$  144.8, 139.7, 136.4, 128.7, 128.0, 126.5, 121.6, 121.3, 63.0, 59.5, 53.7, 35.1, 25.9, 25.2, 14.9; Enantiomeric ratio was determined by SFC: Chiracel OZ-3, 4.6 x 150 mm: 30 °C, A:  $\text{CO}_2$ , B: denatured ethanol (contains 5% MeOH and 5% 2-propanol) with 0.2% of diethylamine (DEA); Isocratic: A/B: 99/1, v/v, flow rate 3.0 mL/min. HRMS (ESI)  $[\text{M}+\text{H}]^+$   $m/z$  calcd for  $[\text{C}_{17}\text{H}_{22}\text{NS}]^+$  is 272.1467, found 272.1466.

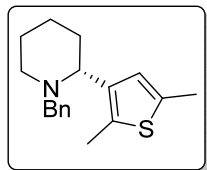

**1-benzyl-2-(2,5-dimethylthiophen-3-yl)piperidine (2e)**

Light yellow liquid, 237 mg, 0.83 mmol, 83% yield, er: 96.7:3.3;  $^1\text{H}$  NMR (500 MHz,  $\text{CDCl}_3$ )  $\delta$  7.18 (m, 5H), 6.77 (s, 1H), 3.80 (d,  $J = 12.4$  Hz, 1H), 3.13 (m, 1H), 2.92 (d,  $J = 13.3$  Hz, 1H), 2.81 (d,  $J = 13.3$  Hz, 1H), 2.40 (s, 3H), 2.35 (s, 3H), 1.88 (td,  $J = 11.4, 3.4$  Hz, 1H), 1.77 (m, 1H), 1.68-1.50 (m, 4H), 1.34 (m, 1H);  $^{13}\text{C}$  NMR (125 MHz,  $\text{CDCl}_3$ )  $\delta$  140.7, 140.0, 135.7, 129.0, 128.2, 126.7, 125.6, 62.0, 59.7, 53.8, 34.7, 26.2, 25.4, 15.5, 13.1; Enantiomeric ratio was determined by SFC: Chiralpack IC-3, 4.6 mm x 150 mm, temperature: 30 °C, A:  $\text{CO}_2$ , B: denatured ethanol (contains 5% MeOH and 5% 2-propanol) with 0.2% of diethylamine (DEA); Isocratic: A/B: 96.5/3.5, v/v, flow rate 3.0 mL/min. HRMS (ESI)  $[\text{M}+\text{H}]^+$   $m/z$  calcd for  $[\text{C}_{18}\text{H}_{24}\text{NS}]^+$  is 286.1624, found 286.1622.

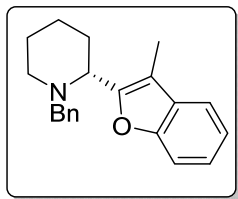

**1-benzyl-2-(3-methylbenzofuran-2-yl)piperidine (2f)**

White solid, 238 mg, 78% yield, er: 90.3:9.7;  $^1\text{H}$  NMR (500 MHz,  $\text{CDCl}_3$ )  $\delta$  7.49 (d,  $J = 8.0$  Hz, 1H), 7.45 (d,  $J = 7.7$  Hz, 1H), 7.26-7.16 (m, 7H), 3.80 (d,  $J = 13.1$  Hz, 1H), 3.47 (dd,  $J = 11.4, 3.6$  Hz, 1H), 3.07 (d,  $J = 13.4$  Hz, 1H), 3.00 (m, 1H), 2.26 (s, 3H), 2.09-2.00 (m, 2H), 1.87-1.76 (m, 2H), 1.69-1.62 (m, 2H), 1.41-1.33 (m, 1H);  $^{13}\text{C}$  NMR (125 MHz,  $\text{CDCl}_3$ )  $\delta$  154.1, 154.0, 138.4, 130.1, 129.3, 128.0, 126.7, 123.6, 122.1, 118.9, 111.5, 111.2, 60.0, 59.6, 53.1, 31.9, 25.7, 24.5, 8.0; Enantiomeric ratio was determined by SFC: Lux Cel 1, 4.6 mm x 150 mm, temperature: 35 °C, A:  $\text{CO}_2$ , B: MeOH with 0.1% of trimethylamine (TEA); Gradient: 1% B to 3% B in 3 min, to 50% B in 5 min, hold at 50%B for 1 min; flow rate 3.0 mL/min, BPR pressure: 150 bar; 254 nm UV detection. HRMS (ESI)  $[\text{M}+\text{H}]^+$   $m/z$  calcd for  $[\text{C}_{21}\text{H}_{24}\text{NO}]^+$  is 306.1852, found 306.1850.

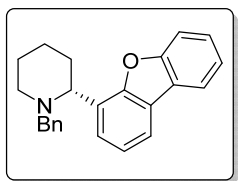

**1-benzyl-2-(dibenzo[b,d]furan-4-yl)piperidine (2g)**

White solid, 303 mg, 0.89 mmol, 89% yield, er: 90.3:9.7;  $^1\text{H}$  NMR (500 MHz,  $\text{CDCl}_3$ )  $\delta$  7.94 (d,  $J = 7.6$  Hz, 1H), 7.81 (dd,  $J = 7.9, 1.2$  Hz, 1H), 7.61 (d,  $J = 8.2$  Hz, 1H), 7.46 (d,  $J = 7.7$  Hz, 1H), 7.37-7.31 (m, 2H), 7.28-7.22 (m, 5H), 7.18 (m, 1H), 3.95 (dd,  $J = 10.9, 2.9$  Hz, 1H), 3.82 (d,  $J = 13.3$  Hz, 1H), 3.05 (m, 1H), 2.93 (d,  $J = 13.3$  Hz, 1H), 2.08 (m, 1H), 1.94 (m, 1H), 1.87-1.74 (m, 2H), 1.71-1.63 (m, 2H), 1.55-1.42 (m, 1H);  $^{13}\text{C}$  NMR (125 MHz,  $\text{CDCl}_3$ )  $\delta$  152.9, 150.1, 139.7, 134.8, 128.9, 128.2, 127.8, 127.1, 126.8, 126.7, 125.2, 124.9, 121.8, 120.8, 118.1, 60.5, 60.0, 53.7, 35.7, 26.2, 25.4; Enantiomeric ratio was determined by SFC: Chiralpack IC-3, 4.6 mm x 150 mm, temperature: 30 °C, A:  $\text{CO}_2$ , B: denatured ethanol (contains 5% MeOH and 5% 2-propanol) with 0.2% of diethylamine (DEA); Isocratic: A/B: 96.5/3.5, v/v, flow rate 3.0 mL/min. HRMS (ESI)  $[\text{M}+\text{H}]^+$   $m/z$  calcd for  $[\text{C}_{24}\text{H}_{24}\text{ON}]^+$  is 342.1852, found 342.1850.

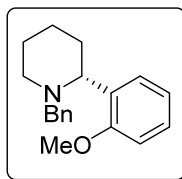

### 1-benzyl-2-(2-methoxyphenyl)piperidine (2h)

White solid, 256 mg, 0.91 mmol, 91% yield, er: 93.7:6.3; the compound data were in good accordance with the literature.<sup>1</sup> <sup>1</sup>H NMR (500 MHz, CDCl<sub>3</sub>) δ 7.59 (d, *J* = 7.9 Hz, 1H), 7.25 (m, 4H), 7.21-7.15 (m, 2H), 6.97 (t, *J* = 7.9 Hz, 1H), 6.86 (d, *J* = 8.4 Hz, 1H), 3.83 (s, 3H), 3.78 (d, *J* = 13.6 Hz, 1H), 3.69 (dd, *J* = 11.1, 2.6 Hz, 1H), 2.97 (m, 1H), 2.82 (d, *J* = 13.7 Hz, 1H), 1.96 (td, *J* = 11.5, 4.0 Hz, 1H), 1.76 (m, 3H), 1.61-1.58 (m, 2H), 1.48 (m, 2H), 1.38 (m, 1H); <sup>13</sup>C NMR (125 MHz, CDCl<sub>3</sub>) δ 140.2, 133.7, 129.9, 128.9, 128.6, 128.1, 127.9, 127.4, 126.6, 121.3, 110.8, 60.0, 59.8, 58.7, 53.9, 35.9, 26.3, 25.5; Enantiomeric ratio was determined by SFC: Chiralpack IC-3, 4.6 mm x 150 mm, temperature: 30 °C, A: CO<sub>2</sub>, B: denatured ethanol (contains 5% MeOH and 5% 2-propanol) with 0.2% of diethylamine (DEA); Isocratic: A/B: 96.5/3.5, v/v, flow rate 3.0 mL/min. HRMS (ESI) [M+H]<sup>+</sup> *m/z* calcd for [C<sub>19</sub>H<sub>24</sub>NO]<sup>+</sup> is 282.1852, found 282.1850.

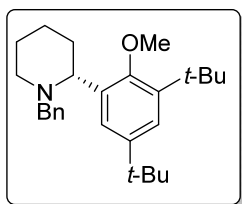

### 1-benzyl-2-(3,5-di-tert-butyl-2-methoxyphenyl)piperidine (2i)

White solid, 350 mg, 0.89 mmol, 89% yield, er: 95.3:4.7; <sup>1</sup>H NMR (500 MHz, CDCl<sub>3</sub>) δ 7.66 (d, *J* = 2.4 Hz, 1H), 7.27-7.22 (m, 4H), 7.20 (d, *J* = 2.4 Hz, 1H), 7.17 (m, 1H), 3.81 (s, 3H), 3.67 (d, *J* = 13.3 Hz, 1H), 3.56 (dd, *J* = 11.0, 2.2 Hz, 1H), 2.96 (d, *J* = 11.4 Hz, 1H), 2.76 (d, *J* = 13.3 Hz, 1H), 1.99 (m, 1H), 1.83 (m, 2H), 1.69-1.57 (m, 3H), 1.45 (m, 1H), 1.40 (s, 9H), 1.32 (m, 9H); <sup>13</sup>C NMR (125 MHz, CDCl<sub>3</sub>) δ 155.6, 146.2, 141.6, 140.7, 138.2, 128.9, 128.1, 126.6, 123.8, 122.8, 62.9, 61.9, 59.7, 54.1, 36.6, 31.8, 31.5, 26.3, 25.8; Enantiomeric ratio was determined by SFC: Chiralcel OJ-3, 4.6 mm x 150 mm, temperature: 30 °C, A: CO<sub>2</sub>, B: denatured ethanol (contains 5% methanol and 5% 2-propanol) with 0.2% of diethylamine (DEA). Isocratic: A/B: 97/3, v/v, flow rate 3.0 mL/min. HRMS (ESI) [M+H]<sup>+</sup> *m/z* calcd for [C<sub>27</sub>H<sub>40</sub>NO]<sup>+</sup> is 394.3104, found 394.3098.

<sup>1</sup> M. Chang, Y. Huang, S. Liu, Y. Chen, S. W. Krska, I. W. Davies, X. Zhang, *Angew. Chem., Int. Ed.* **2014**, *53*, 12761–12764.



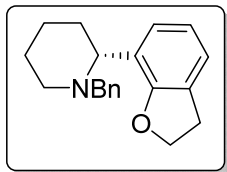

### 1-benzyl-2-(2,3-dihydrobenzofuran-7-yl)piperidine (2j)

White solid, 246 mg, 0.84 mmol, 84% yield, er: 94.5:5.5;  $^1\text{H}$  NMR (500 MHz,  $\text{CDCl}_3$ )  $\delta$  7.59 (d,  $J$  = 7.9 Hz, 1H), 7.25 (m, 4H), 7.21-7.15 (m, 3H), 7.10 (d,  $J$  = 7.9 Hz, 1H), 7.05 (t,  $J$  = 7.8 Hz, 2H), 7.01 (d,  $J$  = 7.5 Hz, 1H), 3.87 (d,  $J$  = 10.1 Hz, 1H), 3.80 (d,  $J$  = 13.3 Hz, 1H), 3.02 (d,  $J$  = 11.2 Hz, 1H), 2.90 (d,  $J$  = 13.3 Hz, 1H), 2.02 (d,  $J$  = 11.6 Hz, 1H), 1.86 (d,  $J$  = 13.6 Hz, 1H), 1.81 (d,  $J$  = 13.6 Hz, 1H), 1.68-1.59 (m, 2H), 1.55-1.42 (m, 2H);  $^{13}\text{C}$  NMR (125 MHz,  $\text{CDCl}_3$ )  $\delta$  152.9, 150.1, 139.7, 134.8, 128.9, 128.2, 127.8, 127.1, 126.8, 126.7, 125.2, 124.9, 121.8, 120.8, 118.1, 60.5, 60.0, 53.7, 35.7, 26.2, 25.4; Enantiomeric ratio was determined by SFC: Lux Cellulose-3, 4.6 x 150 mm, temperature: 30 °C, A:  $\text{CO}_2$ , B: MeOH contains 0.2% of diethylamine; Isocratic: A/B: 90/10, v/v, flow rate 3.0 mL/min. HRMS (ESI)  $[\text{M}+\text{H}]^+$   $m/z$  calcd for  $[\text{C}_{20}\text{H}_{24}\text{ON}]^+$  is 294.1852, found 294.1850.

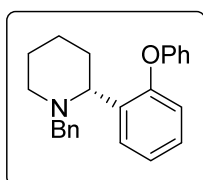

### 1-benzyl-2-(2-phenoxyphenyl)piperidine (2k)

Colorless viscous liquid, 305 mg, 0.89 mmol, 89% yield, er: 93.7:6.3;  $^1\text{H}$  NMR (500 MHz,  $\text{CDCl}_3$ )  $\delta$  7.83-7.855 (m, 1H), 7.33-7.23 (m, 6H), 7.21-7.15 (m, 3H), 7.06 (t,  $J$  = 7.4 Hz, 1H), 6.94 (d,  $J$  = 7.9 Hz, 2H), 6.88 (m, 1H), 3.83 (d,  $J$  = 13.6 Hz, 1H), 3.64 (dd,  $J$  = 11.6, 2.9 Hz, 1H), 2.93 (d,  $J$  = 11.6 Hz, 1H), 2.76 (d,  $J$  = 13.6 Hz, 1H), 1.71-1.92 (m, 3H), 1.51-1.58 (m, 3H), 1.24-1.36 (m, 1H);  $^{13}\text{C}$  NMR (125 MHz,  $\text{CDCl}_3$ )  $\delta$  158.5, 154.0, 140.1, 137.2, 129.8, 128.9, 128.7, 128.2, 127.7, 126.7, 124.7, 122.7, 120.0, 118.0, 60.7, 60.0, 53.6, 36.0, 26.2, 25.3; Enantiomeric ratio was determined by SFC: Chiralcel OJ-3, 4.6 mm x 150 mm, temperature: 30 °C, A:  $\text{CO}_2$ , B: denatured ethanol (contains 5% methanol and 5% 2-propanol) with 0.2% of diethylamine (DEA). Isocratic: A/B: 97/3, v/v, flow rate 3.0 mL/min. HRMS (ESI)  $[\text{M}+\text{H}]^+$   $m/z$  calcd for  $[\text{C}_{24}\text{H}_{26}\text{ON}]^+$  is 344.2009, found 344.2005.

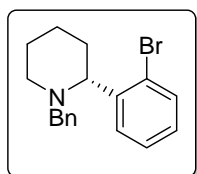

### 1-benzyl-2-(2-bromophenyl)piperidine (2l)

Light yellow solid, 304 mg, 0.92 mmol, 92% yield, er: 95.5:4.5;  $^1\text{H}$  NMR (400 MHz,  $\text{CDCl}_3$ ):  $\delta$  7.79 (dd,  $J$  = 7.8, 1.8 Hz, 1H), 7.51 (dd,  $J$  = 7.7, 0.9 Hz, 1H), 7.31 (m, 1H), 7.27-7.21 (m, 4H), 7.20 (m, 1H), 7.05 (m, 1H), 3.71 (d,  $J$  = 13.5 Hz, 1H), 3.67 (m, 1H), 2.98 (m, 1H), 2.89 (d,  $J$  = 13.7 Hz, 1H), 2.01 (dt,  $J$  = 11.8 Hz, 1H), 1.86 (m, 1H), 1.78 (m, 1H), 1.64-1.53 (m, 2H), 1.48-1.36 (m, 2H);  $^{13}\text{C}$  NMR (100 MHz,  $\text{CDCl}_3$ ):  $\delta$  144.3, 139.6, 132.8, 129.1, 128.8, 128.28, 128.22, 128.0,

125.8, 123.8, 66.7, 59.8, 53.5, 35.3, 25.1, 25.2; Enantiomeric ratio was determined by HPLC: Kromasil 3-AmyCoat, 4.6 mm x 250 mm, temperature: 10 °C, A: Heptane, B: ethanol denatured (contains 5% of IPA and 5% of methanol); Isocratic: A/B: 99/1, v/v, flow rate 3.0 mL/min. HRMS (ESI)  $[M+H]^+$  m/z calcd for  $[C_{18}H_{21}NBr]^+$  is 330.0852, found 330.0847.

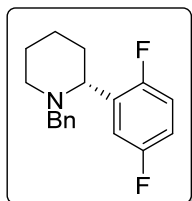

**1-benzyl-2-(2,5-difluorophenyl)piperidine (2m)**

White solid, 247 mg, 0.86 mmol, 86% yield, er: 94.7:5.3;  $^1H$  NMR (400 MHz,  $CDCl_3$ ):  $\delta$  7.41 (m, 1H), 7.30-7.23 (m, 4H), 7.23-7.18 (m, 1H), 6.96 (td,  $J = 9.0, 4.2$  Hz, 1H), 6.85 (m, 1H), 3.74 (d,  $J = 13.8$  Hz, 1H), 3.55 (d,  $J = 10.8$  Hz, 1H), 2.97 (d,  $J = 11.5$  Hz, 1H), 2.88 (d,  $J = 13.5$  Hz, 1H), 1.96 (td,  $J = 11.5, 3.0$  Hz, 1H), 1.83-1.75 (m, 2H), 1.64-1.47 (m, 3H), 1.43-1.31 (m, 1H);  $^{13}C$  NMR (100 MHz,  $CDCl_3$ ):  $\delta$  160.5 (d,  $J = 2.0$  Hz), 158.0 (d,  $J = 2.0$  Hz), 157.6 (d,  $J = 2.5$  Hz), 155.2 (d,  $J = 2.3$  Hz), 139.2, 134.2 (dd,  $J = 15.3, 7.0$  Hz), 128.6, 128.1, 126.7, 116.5 (dd,  $J = 26.0, 8.4$  Hz), 114.8 (dd,  $J = 24.6, 4.9$  Hz), 114.3 (dd,  $J = 24.4, 8.9$  Hz), 59.9, 59.8, 53.3, 35.5, 22.8, 24.9; Enantiomeric ratio was determined by SFC: Chiralcel OJ-3, 4.6 mm x 150 mm, temperature: 30 °C, A:  $CO_2$ , B: denatured ethanol (contains 5% methanol and 5% 2-propanol) with 0.2% of diethylamine (DEA). Isocratic: A/B: 97/3, v/v, flow rate 3.0 mL/min. HRMS (ESI)  $[M]^+$  m/z calcd for  $[C_{18}H_{20}NF_2]^+$  is 288.1558, found 288.1551.

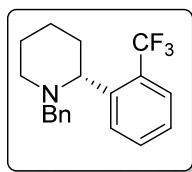

**1-benzyl-2-(2-(trifluoromethyl)phenyl)piperidine (2n)**

White solid, 281 mg, 0.88 mmol, 88% yield, er: 93.5:6.5;  $^1H$  NMR (400 MHz,  $CDCl_3$ ):  $\delta$  8.08 (d,  $J = 7.9$  Hz, 1H), 7.59 (d,  $J = 7.9$  Hz, 1H), 7.55 (t,  $J = 7.3$  Hz, 1H), 7.30 (d,  $J = 7.9$  Hz, 1H), 7.25 (m, 4H), 7.18 (m, 1H), 3.59 (m, 2H), 2.97 (m, 1H), 2.79 (d,  $J = 13.8$  Hz, 1H), 1.96 (td,  $J = 11.7, 3.7$  Hz, 1H), 1.82 (m, 2H), 1.65-1.47 (m, 3H), 1.46-1.36 (m, 1H);  $^{13}C$  NMR (100 MHz,  $CDCl_3$ ):  $\delta$  145.0, 139.9, 132.2, 128.9, 128.6 (q,  $J = 29.6$  Hz), 128.4, 128.0, 126.5, 125.3 (q,  $J = 6.0$  Hz), 123.2 (q,  $J = 274.0$  Hz), 64.1, 60.1, 53.4, 36.9, 26.1, 25.3; Enantiomeric ratio was determined by SFC: Chiralcel OD-3, 4.6 mm x 150 mm, temperature: 30 °C, A:  $CO_2$ , B: denatured ethanol (contains 5% methanol and 5% 2-propanol). Isocratic: A/B: 99/1, v/v, flow rate 3.0 mL/min. HRMS (ESI)  $[M+H]^+$  m/z calcd for  $[C_{19}H_{21}NF_3]^+$  is 320.1621, found 320.1613.

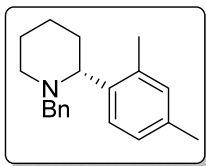

### 1-benzyl-2-(2,4-dimethylphenyl)piperidine (2o)

Light yellow viscous liquid, 245 mg, 0.88 mmol, 88% yield, er: 97.7:2.3;  $^1\text{H}$  NMR (400 MHz,  $\text{CDCl}_3$ )  $\delta$  7.58 (d,  $J = 7.4$  Hz, 1H), 7.28-7.22 (m, 4H), 7.20-7.16 (m, 1H), 7.03 (d,  $J = 7.6$  Hz, 1H), 6.94 (s, 1H), 3.77 (d,  $J = 13.4$  Hz, 1H), 3.32 (d,  $J = 11.2$  Hz, 1H), 2.99 (d,  $J = 11.2$  Hz, 1H), 2.78 (d,  $J = 13.4$  Hz, 1H), 2.34 (s, 3H), 2.28 (s, 3H), 1.94 (td,  $J = 11.1, 4.1$  Hz, 1H), 1.75 (m, 2H), 1.62-1.52 (m, 3H), 1.41-1.31 (m, 1H);  $^{13}\text{C}$  NMR (100 MHz,  $\text{CDCl}_3$ )  $\delta$  140.5, 140.0, 135.7, 135.1, 131.2, 128.9, 128.1, 127.4, 127.2, 126.6, 64.1, 59.6, 53.9, 35.5, 26.3, 25.6, 21.1, 19.7; Enantiomeric ratio was determined by SFC: Chiralpack IC-3, 4.6 mm x 150 mm, temperature: 30 °C, A:  $\text{CO}_2$ , B: ethanol (contains 5% methanol and 5% 2-propanol) with 0.2% of diethylamine); Isocratic: A/B:97/3, v/v, flow rate 3.0 mL/min. HRMS (ESI)  $[\text{M}+\text{H}]^+$  m/z calcd for  $[\text{C}_{20}\text{H}_{26}\text{N}]^+$  is 280.2060, found 280.2055.

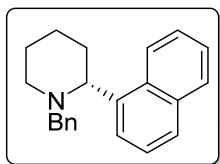

### 1-benzyl-2-(naphthalen-1-yl)piperidine (2p)

White solid, 247 mg, 0.82 mmol, 82% yield, ee: 94.2:5.8;  $^1\text{H}$  NMR (400 MHz,  $\text{CDCl}_3$ ):  $\delta$  7.84 (d,  $J = 8.3$  Hz, 1H), 7.72 (d,  $J = 8.4$  Hz, 1H), 7.52 (t,  $J = 7.2$  Hz, 1H), 7.46 (t,  $J = 7.2$  Hz, 2H), 7.23 (m, 5H), 7.17 (m, 1H), 3.80 (d,  $J = 13.8$  Hz, 1H), 3.08 (d,  $J = 13.8$  Hz, 1H), 2.84 (d,  $J = 13.8$  Hz, 1H), 2.08-1.80 (m, 4H), 1.74-1.54 (m, 3H), 1.51-1.40 (m, 1H);  $^{13}\text{C}$  NMR (100 MHz,  $\text{CDCl}_3$ ):  $\delta$  141.2, 139.9, 134.4, 131.5, 128.9, 128.2, 127.8, 126.7, 125.9, 125.6, 60.1, 54.0, 36.7, 36.2, 26.2, 25.4; Enantiomeric ratio was determined by SFC: Chiralcel OD-3, 4.6 mm x 150 mm, temperature: 30 °C, A:  $\text{CO}_2$ , B: Methanol with 0.2% of diethylamine (DEA). Isocratic: A/B: 90/10, v/v, flow rate 3.0 mL/min. HRMS (ESI)  $[\text{M}]^+$  m/z calcd for  $[\text{C}_{22}\text{H}_{24}\text{N}]^+$  is 302.1903, found 302.1901.

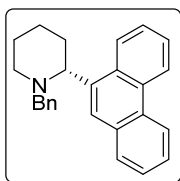

### 1-benzyl-2-(phenanthren-9-yl)piperidine (2q)

White solid, 312 mg, 0.89 mmol, 89% yield, er: 95.6:4.4;  $^1\text{H}$  NMR (400 MHz,  $\text{CDCl}_3$ )  $\delta$  8.75 (br s, 1H), 8.65 (d,  $J = 8.0$  Hz, 1H), 8.25 (br s, 1H), 7.87 (br s, 1H), 7.66 (m, 2H), 7.58 (m, 2H), 7.58 (m, 2H), 7.33-7.09 (m, 4H), 4.14-3.55 (m, 2H), 3.11 (br s, 1H), 2.90 (br s, 1H), 2.21-1.97 (m, 1H), 1.85 (m, 2H), 1.74 (m, 3H), 1.49 (m, 1H);  $^{13}\text{C}$  NMR (100 MHz,  $\text{CDCl}_3$ )  $\delta$  139.5, 139.1, 132.1, 130.9, 130.5, 128.9, 128.5, 128.0, 126.6, 126.5, 126.3, 123.3, 122.4, 62.5,

60.5, 53.8, 36.1, 26.0, 25.5; Enantiomeric ratio was determined by SFC: Chiralcel OD-3, 4.6 mm x 150 mm, temperature: 30 °C, A: CO<sub>2</sub>, B: denatured ethanol (contains 5% methanol and 5% 2-propanol) with 0.2% of diethylamine (DEA). Isocratic: A/B: 75/25, v/v, flow rate 3.0 mL/min. HRMS (ESI) [M+H]<sup>+</sup> m/z calcd for [C<sub>26</sub>H<sub>26</sub>N]<sup>+</sup> is 352.2060, found 352.2056.

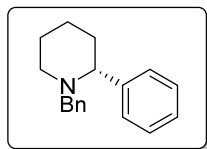

### 2-(2-phenyl)-1-benzylpiperidine (2r)

White solid, 228 mg, 0.91 mmol, 91% yield, er: 92.7:7.3; the compound data were in good accordance with the literature.<sup>1</sup> <sup>1</sup>H NMR (500 MHz, CDCl<sub>3</sub>) δ 7.45 (d, *J* = 7.6 Hz, 2H), 7.32 (t, *J* = 7.7 Hz, 2H), 7.17-7.25 (m, 6H), 3.77 (d, *J* = 13.8 Hz, 1H), 3.11 (d, *J* = 11.3 Hz, 1H), 2.95-2.97 (m, 1H), 2.80 (d, *J* = 13.2 Hz, 1H), 1.90-1.95 (dt, *J* = 11.6, 3.4 Hz, 1H), 1.76-1.80 (m, 2H), 1.53-1.65 (m, 3H), 1.32-1.42 (m, 1H); <sup>13</sup>C NMR (500 MHz, CDCl<sub>3</sub>): δ 145.7, 139.8, 128.7, 128.5, 128.0, 127.4, 126.8, 126.5, 69.2, 59.8, 53.4, 37.0, 26.0, 25.3, 25.3, 26.0; Enantiomeric ratio was determined by SFC: Lux Cel3, 4.6 mm x 150 mm, temperature: 35 °C, A: CO<sub>2</sub>, B: MeOH; Gradient: 1% B to 3% B in 3 min, to 50% B in 5 min, hold at 50% B for 1 min; flow rate 3.0 mL/min, BPR pressure: 150 bar; 220 nm UV detection.

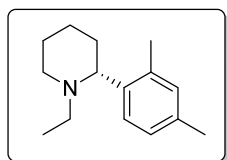

### 2-(2,4-dimethylphenyl)-1-ethylpiperidine (2s)

Yellow liquid, 132 mg, 0.61 mmol, 61% yield, er: 99:1; <sup>1</sup>H NMR (500 MHz, CDCl<sub>3</sub>) δ 7.37 (d, *J* = 7.9 Hz, 1H), 7.00 (d, *J* = 7.9 Hz, 1H), 6.92 (s, 1H), 3.22 (t, *J* = 10.8 Hz, 2H), 2.55 (hex, *J* = 7.2 Hz, 1H), 2.30 (s, 3H), 2.28 (s, 3H), 2.03 (dt, *J* = 12.0, 2.8 Hz, 1H), 1.94 (hex, *J* = 7.2 Hz, 1H), 1.79-1.63 (m, 4H), 1.52-1.45 (m, 1H), 1.37-1.31 (m, 1H), 0.90 (t, *J* = 7.2 Hz, 3H); <sup>13</sup>C NMR (125 MHz, CDCl<sub>3</sub>) δ 140.4, 135.6, 135.0, 131.1, 127.2, 63.9, 53.1, 48.9, 35.5, 26.4, 25.6, 21.1, 19.6, 11.6; Enantiomeric ratio was determined by SFC: Chiralcel OZ-3, 4.6 mm x 150 mm, temperature: 40 °C, A: CO<sub>2</sub>, B: MeOH with 0.2% of diethylamine (DEA). Isocratic: A/B: 92/8, v/v, flow rate 3.0 mL/min; HRMS (ESI) [M+H]<sup>+</sup> m/z calcd for [C<sub>15</sub>H<sub>24</sub>N]<sup>+</sup> is 218.1903, found 218.1904.

<sup>1</sup> M. Chang, Y. Huang, S. Liu, Y. Chen, S. W. Krska, I. W. Davies, X. Zhang, *Angew. Chem., Int. Ed.* **2014**, *53*, 12761–12764.

7.756  
7.785  
7.781  
7.769  
7.766  
7.619  
7.613  
7.600  
7.287  
7.277  
7.274  
7.264  
7.263  
7.258  
7.190  
7.187  
7.175  
7.171  
7.156  
7.153  
7.145  
7.138  
7.130  
7.122  
7.119  
7.115  
7.106  
7.104  
7.098  
7.088  
7.039  
7.036  
7.024  
7.021  
7.009  
7.006  
6.986  
6.917  
6.902  
6.901

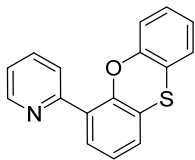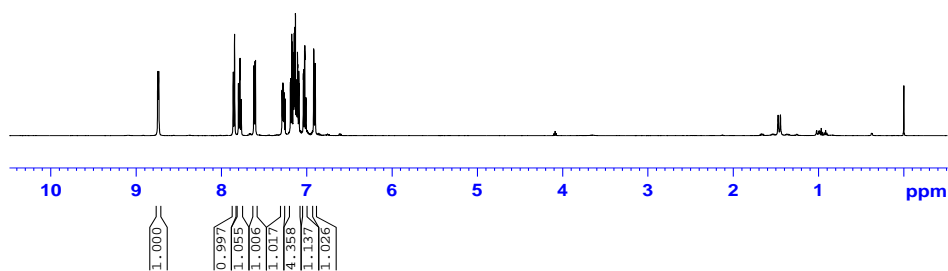

154.821  
152.446  
149.775  
149.683  
135.736  
130.205  
129.666  
127.689  
127.381  
126.865  
126.865  
126.645  
124.540  
122.238  
121.529  
121.159  
117.779

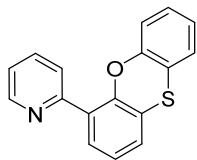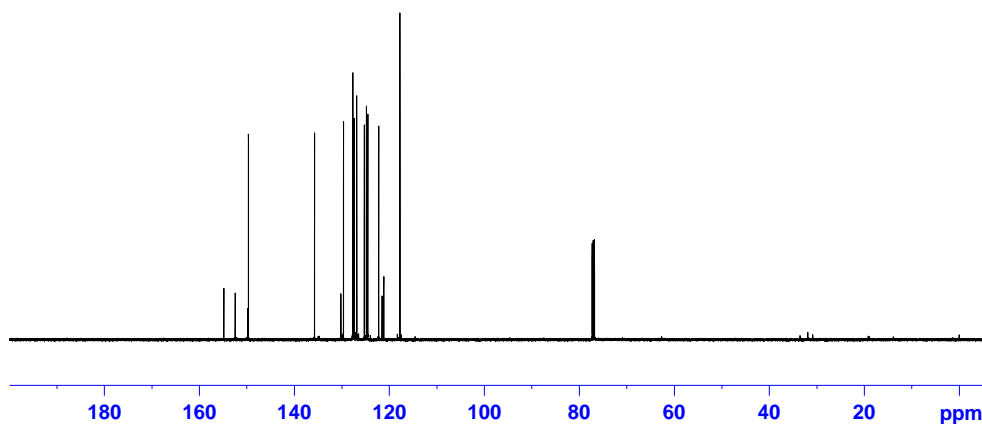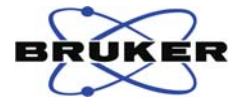

Current Data Parameters  
NAME ovz1-00024-d  
EXPNO 1  
PROCNO 1

F2 - Acquisition Parameters  
Date\_ 20170104  
Time 17.47  
INSTRUM spect  
PROBHD 5 mm PABBO BB/  
PULPROG zg10  
TD 32768  
SOLVENT CDCl3  
NS 16  
DS 0  
SWH 7500.000 Hz  
FIDRES 0.228882 Hz  
AQ 2.1845334 sec  
RG 406  
DW 66.667 usec  
DE 6.50 usec  
TE 299.0 K  
D1 1.00000000 sec  
TDO 1

===== CHANNEL f1 =====  
SFO1 500.1325007 MHz  
NUC1 1H  
P1 14.00 usec  
PLW1 18.79999924 W

F2 - Processing parameters  
SI 16384  
SF 500.1300160 MHz  
WDW EM  
SSB 0  
LB 0.30 Hz  
GB 0  
PC 1.00

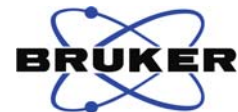

Current Data Parameters  
NAME ovz1-00024-d  
EXPNO 2  
PROCNO 1

F2 - Acquisition Parameters  
Date\_ 20170104  
Time 23.41  
INSTRUM spect  
PROBHD 5 mm PABBO BB/  
PULPROG zgpg  
TD 262144  
SOLVENT CDCl3  
NS 1024  
DS 0  
SWH 31250.000 Hz  
FIDRES 0.119209 Hz  
AQ 4.1943040 sec  
RG 2050  
DW 16.000 usec  
DE 6.50 usec  
TE 299.1 K  
D1 1.00000000 sec  
D11 0.03000000 sec  
TDO 1

===== CHANNEL f1 =====  
SFO1 125.7698617 MHz  
NUC1 13C  
P1 10.00 usec  
PLW1 99.50000000 W

===== CHANNEL f2 =====  
SFO2 500.1325007 MHz  
NUC2 1H  
CPDPRG[2] waltz16  
PCPD2 80.00 usec  
PLW2 18.79999924 W  
PLW12 0.57574999 W  
PLW13 0.28960001 W

F2 - Processing parameters  
SI 131072  
SF 125.7577890 MHz  
WDW EM  
SSB 0  
LB 0.30 Hz  
GB 0  
PC 1.40

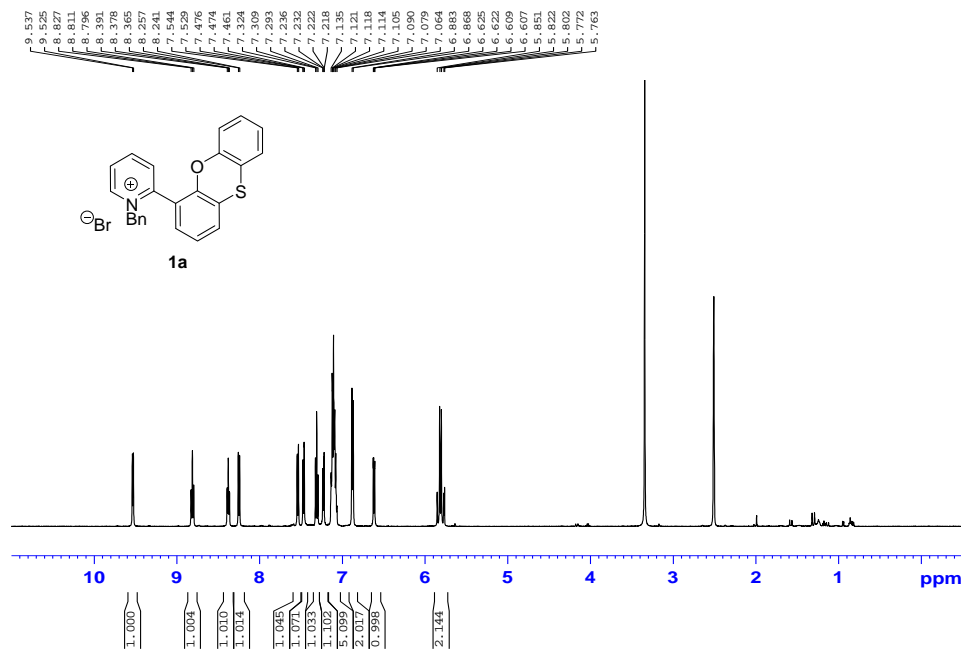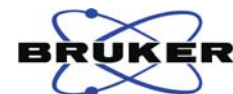

Current Data Parameters  
 NAME ovz1-00027-d  
 EXPNO 1  
 PROCNO 1

F2 - Acquisition Parameters  
 Date\_ 20170104  
 Time 8.45  
 INSTRUM spect  
 PROBHD 5 mm PABBO BB/  
 PULPROG zg30  
 TD 32768  
 SOLVENT DMSO  
 NS 16  
 DS 0  
 SWH 7500.000 Hz  
 FIDRES 0.228882 Hz  
 AQ 2.1845334 sec  
 RG 512  
 DW 66.667 usec  
 DE 6.50 usec  
 TE 299.1 K  
 D1 1.0000000 sec  
 TDO 1

==== CHANNEL f1 =====  
 SFO1 500.1325007 MHz  
 NUC1 1H  
 PL 14.00 usec  
 PLW1 18.79999924 W

F2 - Processing parameters  
 SI 16384  
 SF 500.1300000 MHz  
 WDW EM  
 SSB 0  
 LB 0.30 Hz  
 GB 0  
 PC 1.00

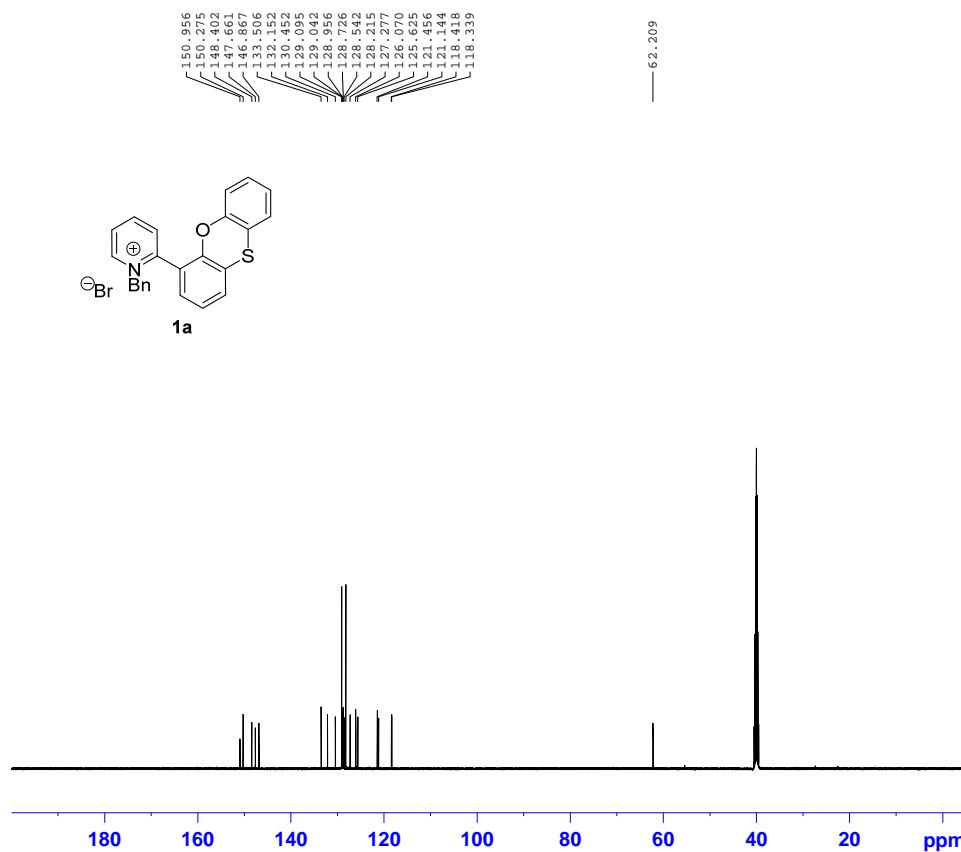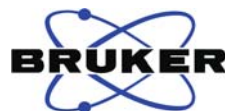

Current Data Parameters  
 NAME ovz1-00027-d  
 EXPNO 2  
 PROCNO 1

F2 - Acquisition Parameters  
 Date\_ 20170104  
 Time 20.33  
 INSTRUM spect  
 PROBHD 5 mm PABBO BB/  
 PULPROG zgpg  
 TD 262144  
 SOLVENT DMSO  
 NS 1024  
 DS 0  
 SWH 31250.000 Hz  
 FIDRES 0.119209 Hz  
 AQ 4.1943040 sec  
 RG 2050  
 DW 16.000 usec  
 DE 6.50 usec  
 TE 299.0 K  
 D1 1.0000000 sec  
 D11 0.0300000 sec  
 TDO 1

==== CHANNEL f1 =====  
 SFO1 125.7698617 MHz  
 NUC1 13C  
 PL 10.00 usec  
 PLW1 99.5000000 W

==== CHANNEL f2 =====  
 SFO2 500.1325007 MHz  
 NUC2 1H  
 CPDPRG[2] waltz16  
 PCPD2 80.00 usec  
 PLW2 18.79999924 W  
 PLW12 0.57574999 W  
 PLW13 0.28960001 W

F2 - Processing parameters  
 SI 131072  
 SF 125.7577890 MHz  
 WDW EM  
 SSB 0  
 LB 0.30 Hz  
 GB 0  
 PC 1.40

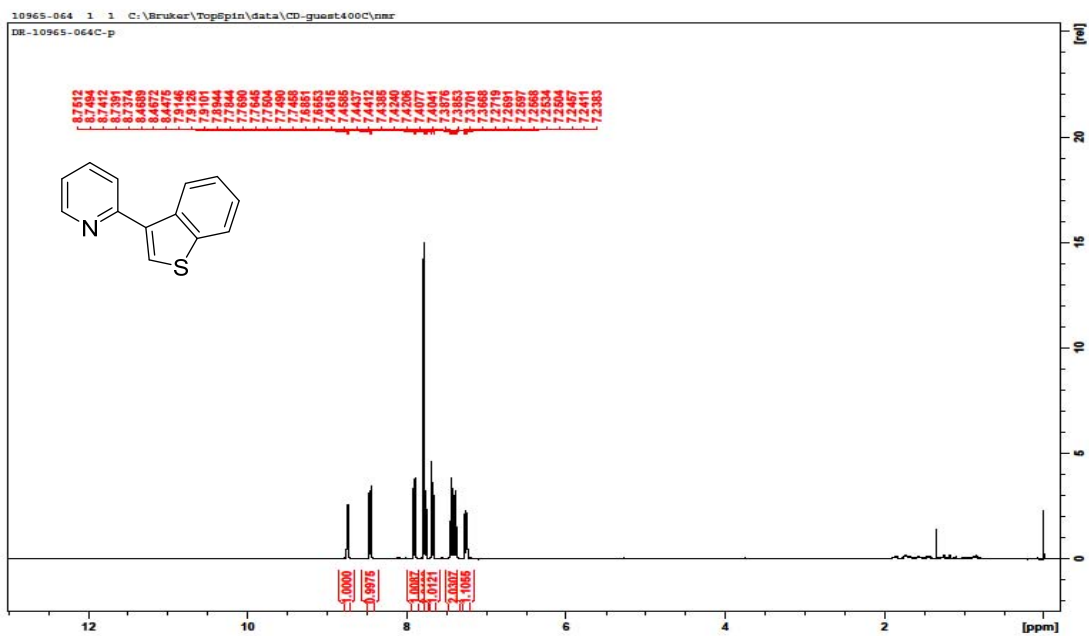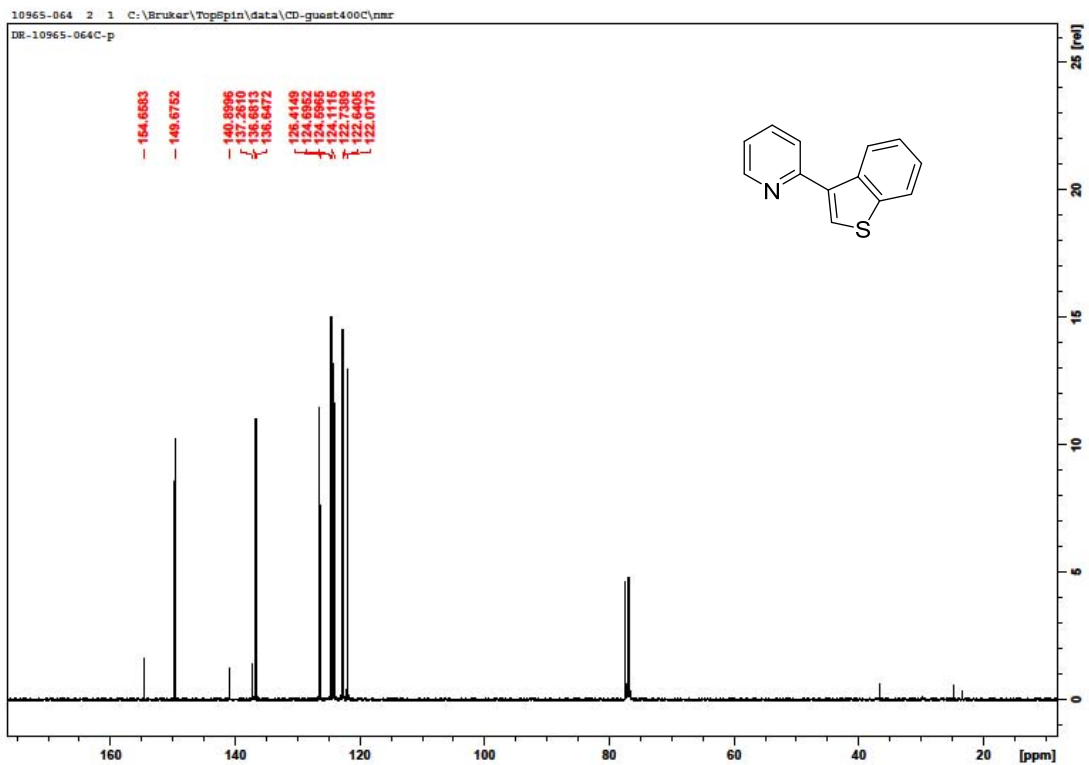

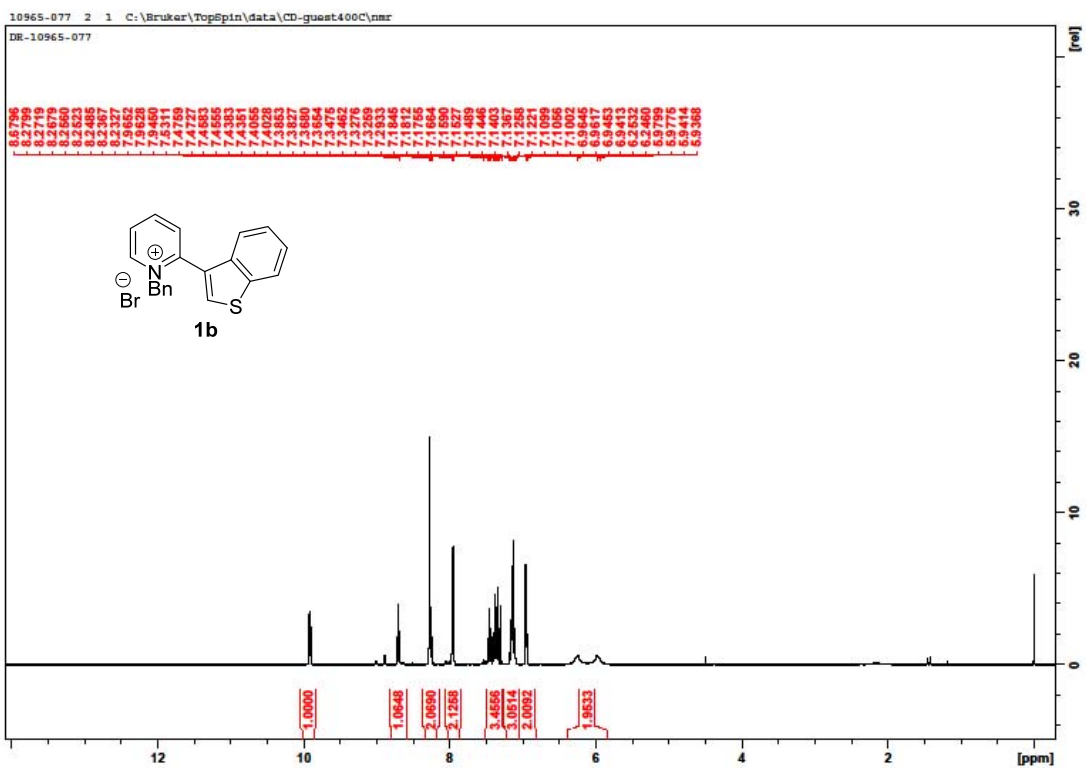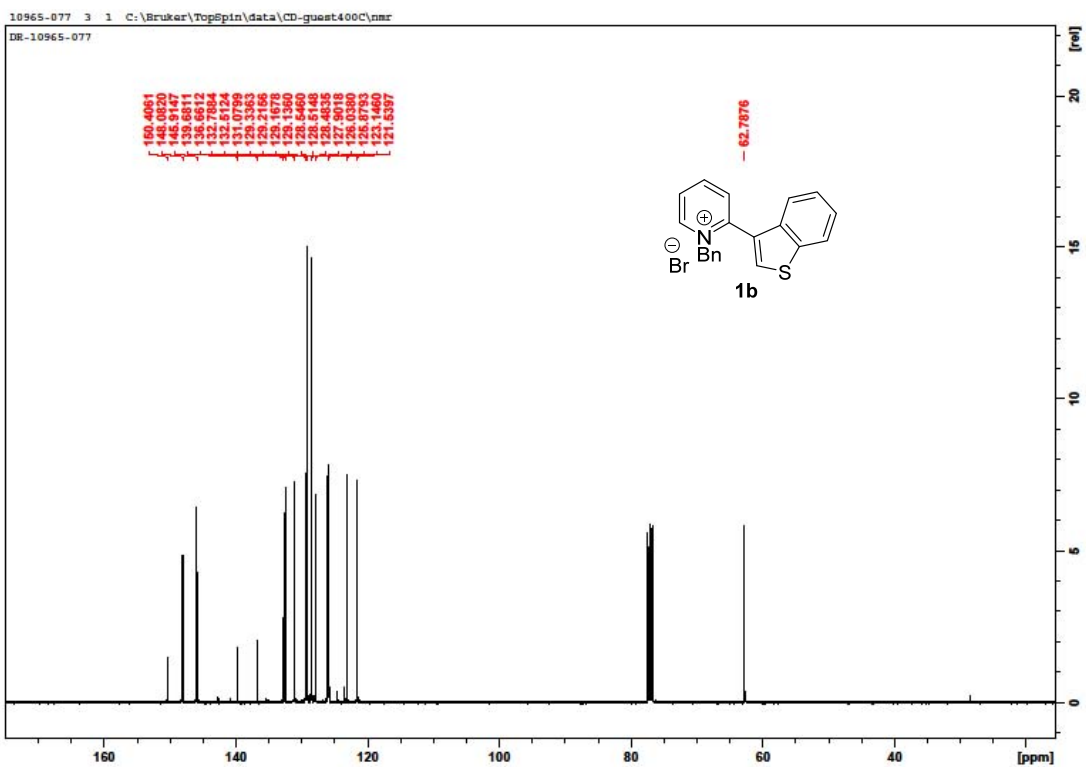



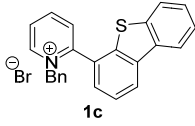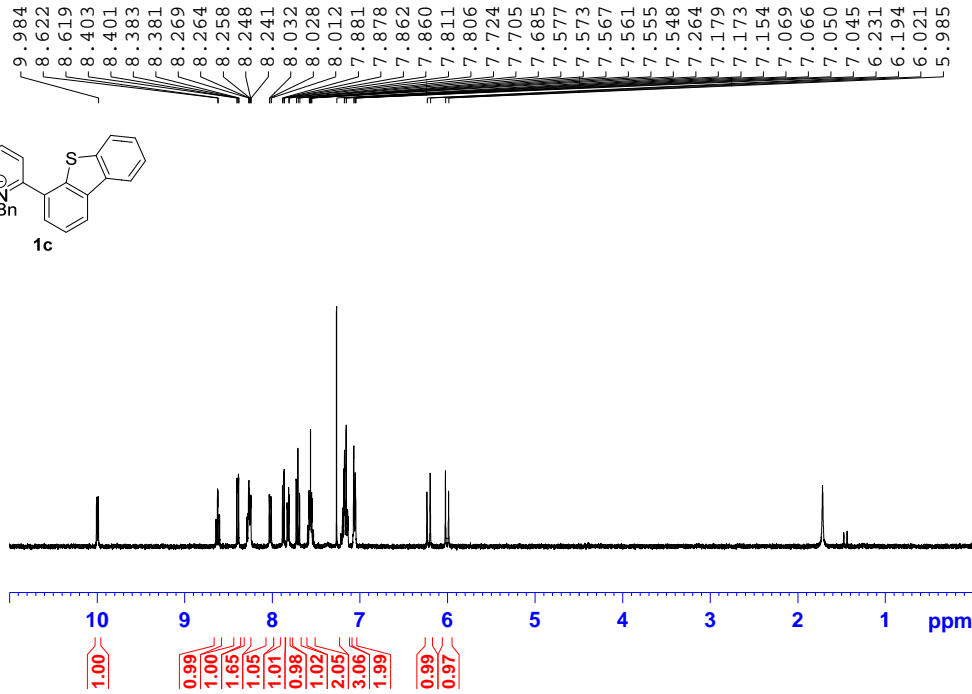

Current Data Parameters  
 NAME 10967-111  
 EXPNO 1  
 PROCNO 1

F2 - Acquisition Parameters  
 Date\_ 20170421  
 Time 17.26  
 INSTRUM spect  
 PROBHD 5 mm PABBO BB-  
 PULPROG zg10  
 TD 32768  
 SOLVENT CDCl3  
 NS 4  
 DS 4  
 SWH 5896.227 Hz  
 FIDRES 0.179939 Hz  
 AQ 2.7787263 sec  
 RG 645  
 DW 84.800 usec  
 DE 6.50 usec  
 TE 298.0 K  
 D1 2.0000000 sec  
 TD0 1

===== CHANNEL f1 =====  
 SFO1 400.1327209 MHz  
 NUC1 1H  
 P1 15.00 usec  
 PLW1 10.5000000 W

F2 - Processing parameters  
 SI 65536  
 SF 400.1300088 MHz  
 WDW EM  
 SSB 0  
 LB 0.05 Hz  
 GB 0  
 PC 1.00

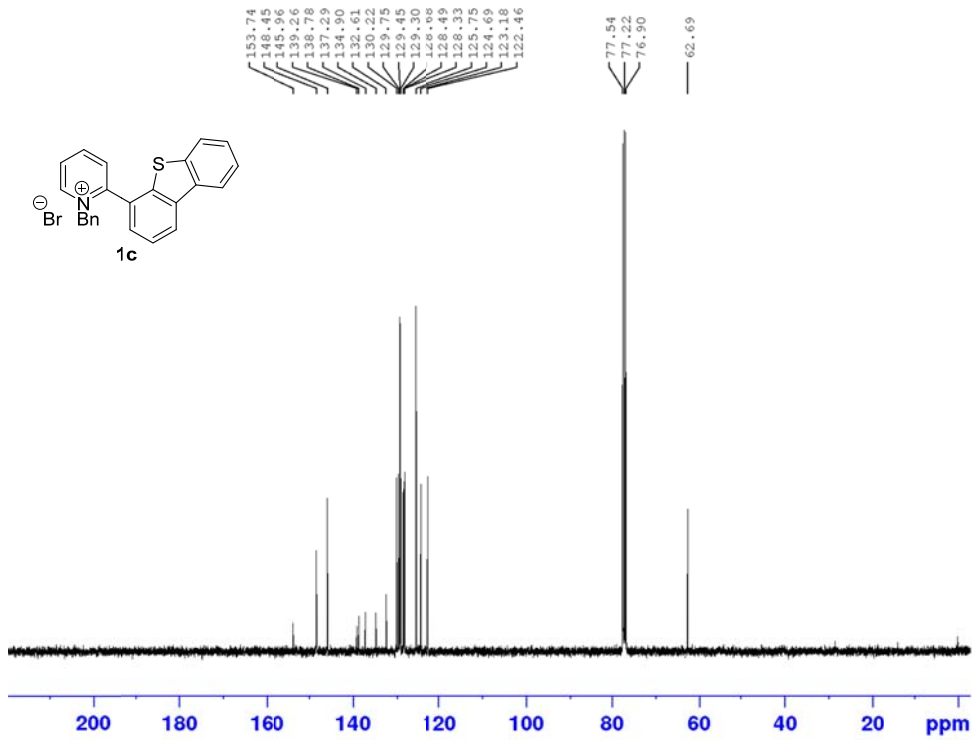

Current Data Parameters  
 NAME 10967-111  
 EXPNO 2  
 PROCNO 1

F2 - Acquisition Parameters  
 Date\_ 20170422  
 Time 0.35  
 INSTRUM spect  
 PROBHD 5 mm PABBO BB-  
 PULPROG zgpg  
 TD 32768  
 SOLVENT CDCl3  
 NS 2500  
 DS 4  
 SWH 24038.461 Hz  
 FIDRES 0.733596 Hz  
 AQ 0.6815714 sec  
 RG 2050  
 DW 20.800 usec  
 DE 6.50 usec  
 TE 298.0 K  
 D1 2.0000000 sec  
 D11 0.0300000 sec  
 TD0 1

===== CHANNEL f1 =====  
 SFO1 100.6243395 MHz  
 NUC1 13C  
 P1 10.90 usec  
 PLW1 43.0000000 W

===== CHANNEL f2 =====  
 SFO2 400.1316035 MHz  
 NUC2 1H  
 CPDPRG[2] waltz16  
 PCPD2 90.00 usec  
 PLW2 10.5000000 W  
 PLW12 0.29166999 W  
 PLW13 0.14670999 W

F2 - Processing parameters  
 SI 65536  
 SF 100.6127535 MHz  
 WDW EM  
 SSB 0  
 LB 1.00 Hz  
 GB 0  
 PC 1.40

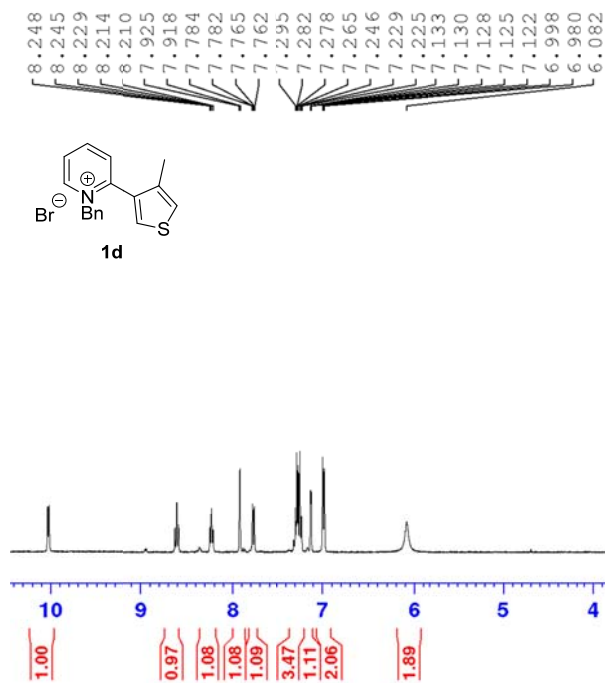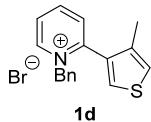

Current Data Parameters  
 NAME sb\_10945\_103-2  
 EXPNO 1  
 PROCNO 1

F2 - Acquisition Parameters  
 Date\_ 20170525  
 Time 20.30  
 INSTRUM spect  
 PROBHD 5 mm PABBO BB-  
 PULPROG zg10  
 TD 32768  
 SOLVENT CDCl3  
 NS 16  
 DS 4  
 SWH 5896.227 Hz  
 FIDRES 0.179939 Hz  
 AQ 2.7787263 sec  
 RG 575  
 DW 84.800 usec  
 DE 6.50 usec  
 TE 298.0 K  
 D1 2.00000000 sec  
 TD0 1

----- CHANNEL f1 -----  
 SFO1 400.1327209 MHz  
 NUC1 1H  
 P1 15.00 usec  
 PLW1 10.50000000 W

F2 - Processing parameters  
 SI 65536  
 SF 400.1300013 MHz  
 EM  
 SSB 0  
 LB 0.05 Hz  
 GB 0  
 PC 1.00

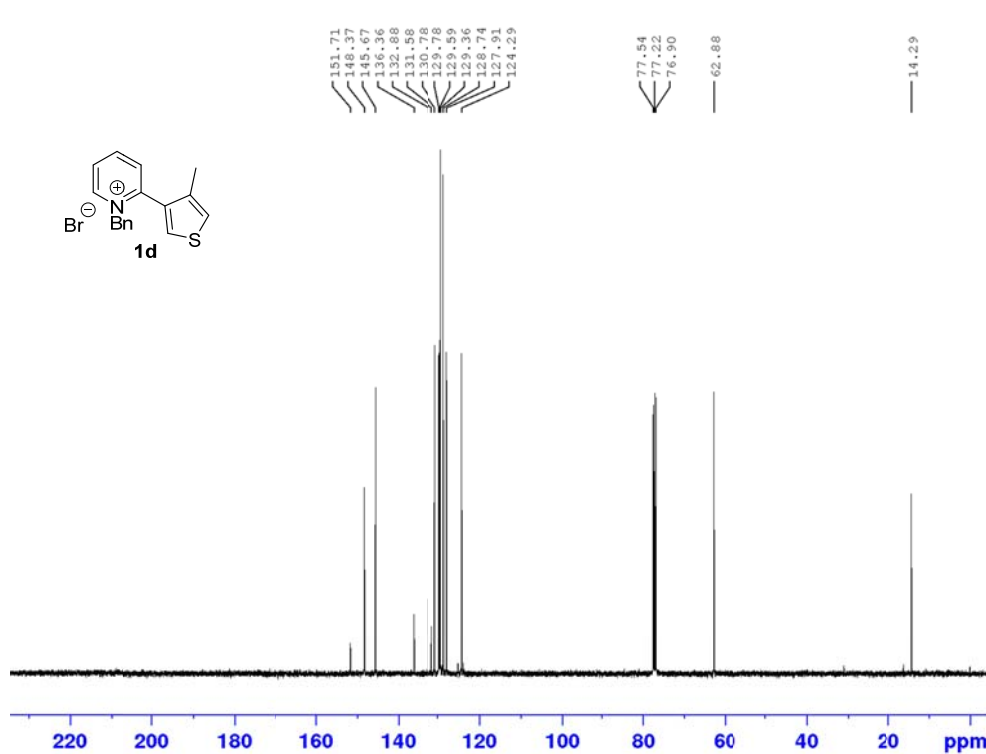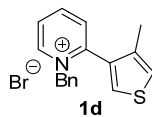

Current Data Parameters  
 NAME sb\_10945\_103-2  
 EXPNO 2  
 PROCNO 1

F2 - Acquisition Parameters  
 Date\_ 20170525  
 Time 22.32  
 INSTRUM spect  
 PROBHD 5 mm PABBO B3-  
 PULPROG zgpg  
 TD 32768  
 SOLVENT CDCl3  
 NS 4096  
 DS 4  
 SWH 24038.451 Hz  
 FIDRES 0.733596 Hz  
 AQ 0.6815744 sec  
 RG 2050  
 DW 20.830 usec  
 DE 6.50 usec  
 TE 298.0 K  
 D1 1.00000000 sec  
 D11 0.03000000 sec  
 TD0 1

----- CHANNEL f1 -----  
 SFO1 100.6243395 MHz  
 NUC1 13C  
 P1 10.90 usec  
 PLW1 43.00000000 W

----- CHANNEL f2 -----  
 SFO2 400.1316005 MHz  
 NUC2 1H  
 CPDPRG2 waltz16  
 PCPE2 90.30 usec  
 PLW2 10.50000000 W  
 PLW12 0.29166999 W  
 PLW13 0.14670999 W

F2 - Processing parameters  
 SI 65536  
 SF 100.6127530 MHz  
 EM  
 SSB 0  
 LB 1.00 Hz  
 GB 0  
 PC 1.40

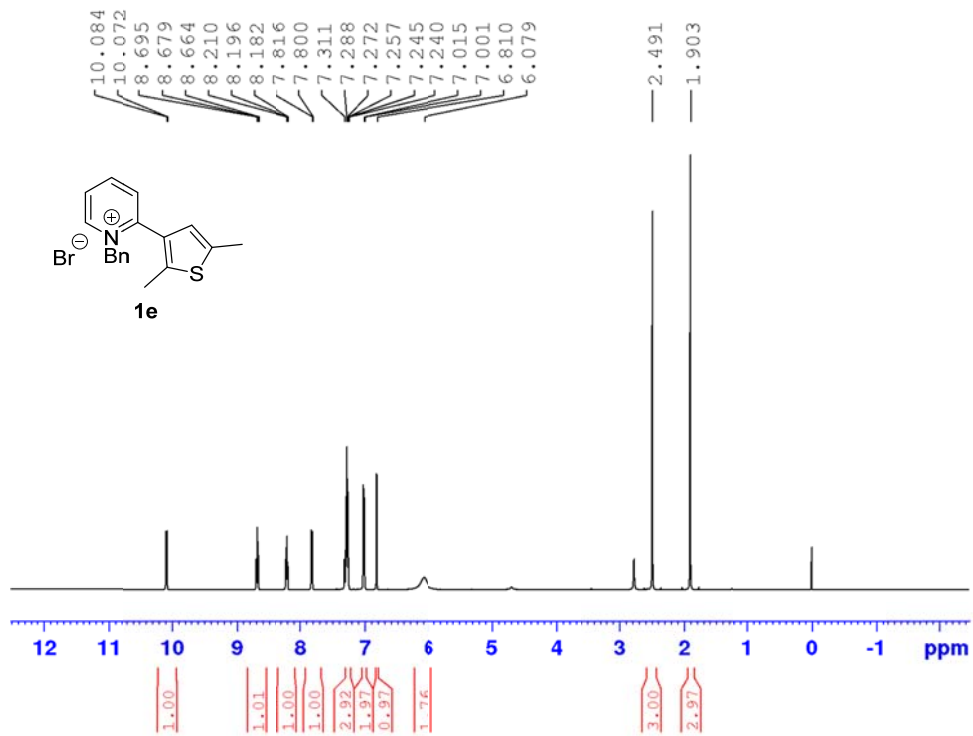

Current Data Parameters  
 NAME 10963-071  
 EXPNO 1  
 PROCNO 1

F2 - Acquisition Parameters  
 Date\_ 2017052  
 Time 12.02  
 INSTRUM spect  
 PROBHD 5 mm PABBO BB-  
 PULPROG zg:0  
 TD 32768  
 SOLVENT CDCl3  
 NS 64  
 DS 0  
 SWH 7500.000 Hz  
 FIDRES 0.228832 Hz  
 AQ 2.1845334 sec  
 RG 256  
 DW 66.667 usec  
 DE 6.50 usec  
 TE 299.0 K  
 D1 1.00000000 sec  
 TD0 1

----- CHANNEL f1 -----  
 SFO1 500.1325037 MHz  
 NUC1 1H  
 P1 11.75 usec  
 PLW1 18.39999962 W

F2 - Processing parameters  
 SI 16384  
 SF 500.1299867 MHz  
 WDW EM  
 SSB 0  
 LB 0.30 Hz  
 GB 0  
 PC 1.00

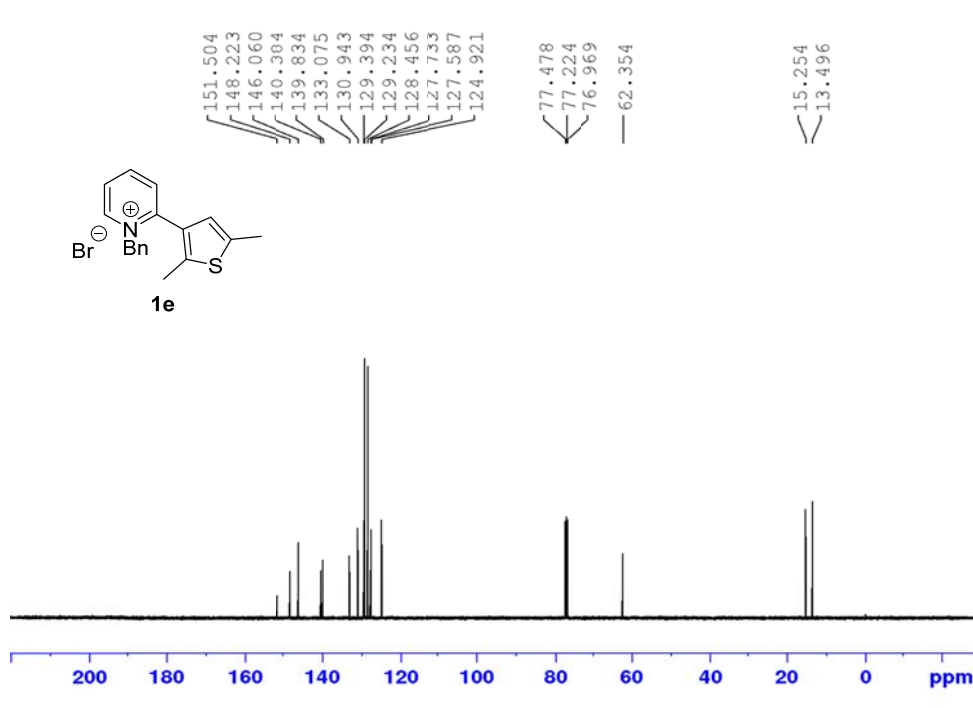

Current Data Parameters  
 NAME 10963-071  
 EXPNO 2  
 PROCNO 1

F2 - Acquisition Parameters  
 Date\_ 20170512  
 Time 12.18  
 INSTRUM spect  
 PROBHD 5 mm PABBO BB-  
 PULPROG zgpg  
 TD 262144  
 SOLVENT CDCl3  
 NS 160  
 DS 0  
 SWH 31250.000 Hz  
 FIDRES 0.119209 Hz  
 AQ 4.1943040 sec  
 RG 2050  
 DW 16.000 usec  
 DE 6.50 usec  
 TE 299.0 K  
 D1 1.00000000 sec  
 D11 0.03000000 sec  
 TD0 1

----- CHANNEL f1 -----  
 SFO1 125.7698617 MHz  
 NUC1 13C  
 P1 9.15 usec  
 PLW1 126.00000000 W

----- CHANNEL f2 -----  
 SFO2 500.1325037 MHz  
 NUC2 1H  
 CPDPRG2 waltz16  
 PCPD2 80.00 usec  
 PLW2 18.39999962 W  
 PLW12 0.41056031 W  
 PLW13 0.20651031 W

F2 - Processing parameters  
 SI 131072  
 SF 125.7577760 MHz  
 WDW EM  
 SSB 0  
 LB 0.30 Hz  
 GB 0  
 PC 1.40

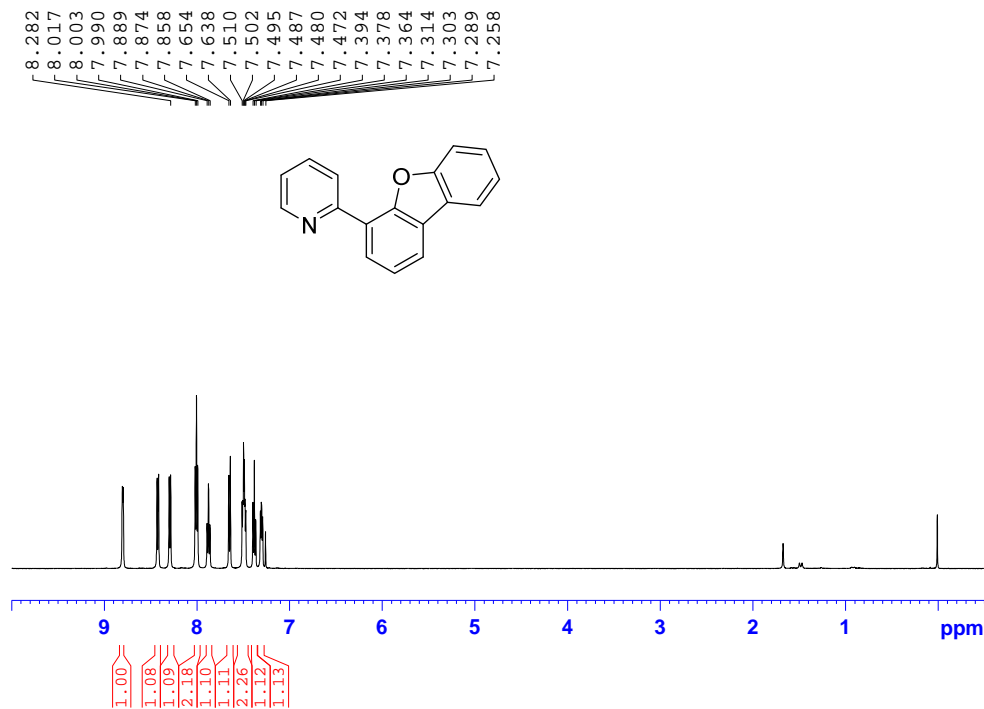

```
Current Data Parameters
NAME      10967-121
EXPNO    1
PROCNO   1

F2 - Acquisition Parameters
Date_    20170523
Time     17.04
INSTRUM spect
PROBHD   5 mm PABBO BB-
PULPROG zg30
TD       32768
SOLVENT  CDC13
NS       16
DS       0
SWH      7500.000 Hz
FIDRES   0.228882 Hz
AQ       2.1845334 sec
RG       362
DW       66.667 usec
DE       6.50 usec
TE       299.0 K
D1       1.00000000 sec
TD0      1

===== CHANNEL f1 =====
SF01    500.1325007 MHz
NUC1     1H
P1       11.75 usec
PLW1    18.39999962 W

F2 - Processing parameters
SI       16384
SF       500.1300123 MHz
WDW      EM
SSB      0
LB       0.30 Hz
GB       0
PC       1.00
```

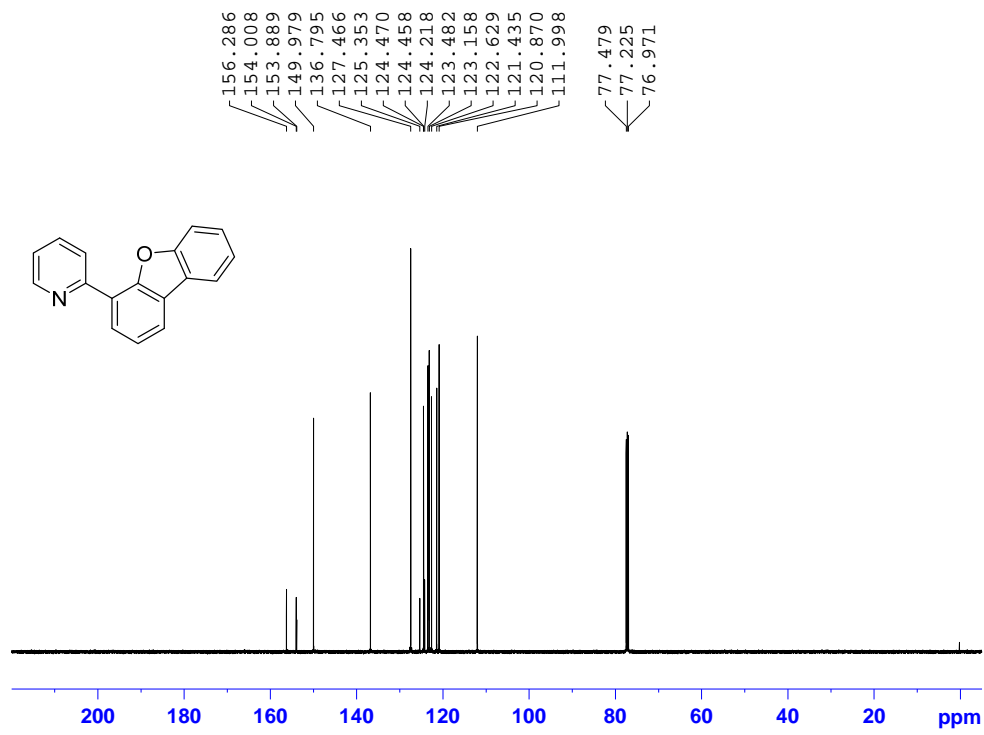

```
Current Data Parameters
NAME      10967-121
EXPNO    2
PROCNO   1

F2 - Acquisition Parameters
Date_    20170523
Time     23.04
INSTRUM spect
PROBHD   5 mm PABBO BB-
PULPROG zgpg
TD       262144
SOLVENT  CDC13
NS       1200
DS       0
SWH      31250.000 Hz
FIDRES   0.119209 Hz
AQ       4.1943040 sec
RG       2050
DW       16.000 usec
DE       6.50 usec
TE       299.0 K
D1       1.00000000 sec
D11      0.03000000 sec
TD0      1

===== CHANNEL f1 =====
SF01    125.7698617 MHz
NUC1     13C
P1       9.75 usec
PLW1    126.00000000 W

===== CHANNEL f2 =====
SF02    500.1325007 MHz
NUC2     1H
PCPD2   waltz16
PCPD2   80.00 usec
PLW2    18.39999962 W
PLW12   0.41056001 W
PLW13   0.20651001 W

F2 - Processing parameters
SI       131072
SF       125.7577657 MHz
WDW      EM
SSB      0
LB       0.30 Hz
GB       0
PC       1.40
```

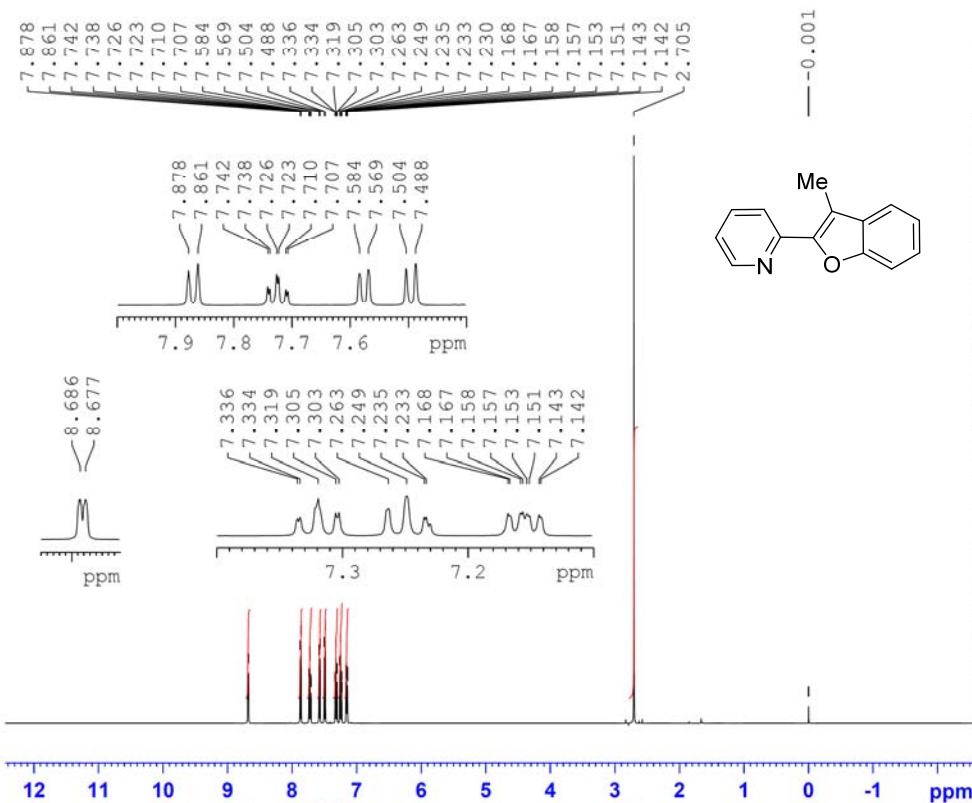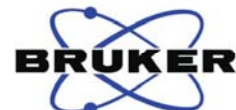

Current Data Parameters  
 NAME srl-00274  
 EXPNO 1  
 PROCNO 1

F2 - Acquisition Parameters  
 Date\_ 20171019  
 Time\_ 13.33  
 INSTRUM spect  
 PROBHD 5 mm PABBO BB-  
 PULPROG zg10  
 TD 32768  
 SOLVENT CDCl3  
 NS 16  
 DS 0  
 SWH 7500.000 Hz  
 FIDRES 0.228882 Hz  
 AQ 2.1845334 sec  
 RG 144  
 DW 66.667 usec  
 DE 6.50 usec  
 TE 299.0 K  
 D1 1.00000000 sec  
 TDO 1

===== CHANNEL f1 =====  
 SF01 500.1325007 MHz  
 NUC1 1H  
 P1 11.75 usec  
 PLW1 18.39999962 W

F2 - Processing parameters  
 SI 16384  
 SF 500.1300268 MHz  
 WDW EM  
 SSB 0  
 LB 0.30 Hz  
 GB 0  
 PC 1.00

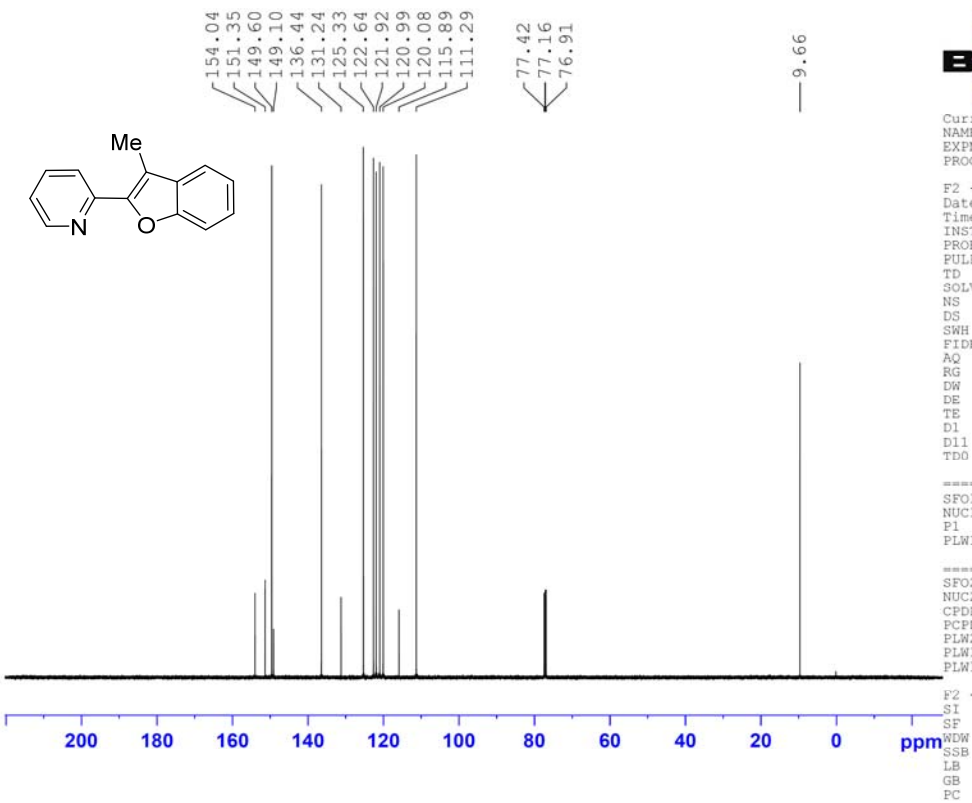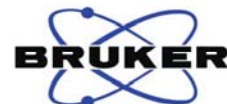

Current Data Parameters  
 NAME srl-00274  
 EXPNO 2  
 PROCNO 1

F2 - Acquisition Parameters  
 Date\_ 20171019  
 Time\_ 13.52  
 INSTRUM spect  
 PROBHD 5 mm PABBO BB-  
 PULPROG zgpg  
 TD 262144  
 SOLVENT CDCl3  
 NS 200  
 DS 0  
 SWH 31250.000 Hz  
 FIDRES 0.119209 Hz  
 AQ 4.1943040 sec  
 RG 2050  
 DW 16.000 usec  
 DE 6.50 usec  
 TE 299.0 K  
 D1 1.00000000 sec  
 D11 0.03000000 sec  
 TDO 1

===== CHANNEL f1 =====  
 SF01 125.7698617 MHz  
 NUC1 13C  
 P1 9.75 usec  
 PLW1 126.00000000 W

===== CHANNEL f2 =====  
 SF02 500.1325007 MHz  
 NUC2 1H  
 CPDPRG[2] waltz16  
 PCPD2 80.00 usec  
 PLW2 18.39999962 W  
 PLW12 0.41056001 W  
 PLW13 0.20651001 W

F2 - Processing parameters  
 SI 131072  
 SF 125.7577784 MHz  
 WDW EM  
 SSB 0  
 LB 0.30 Hz  
 GB 0  
 PC 1.40

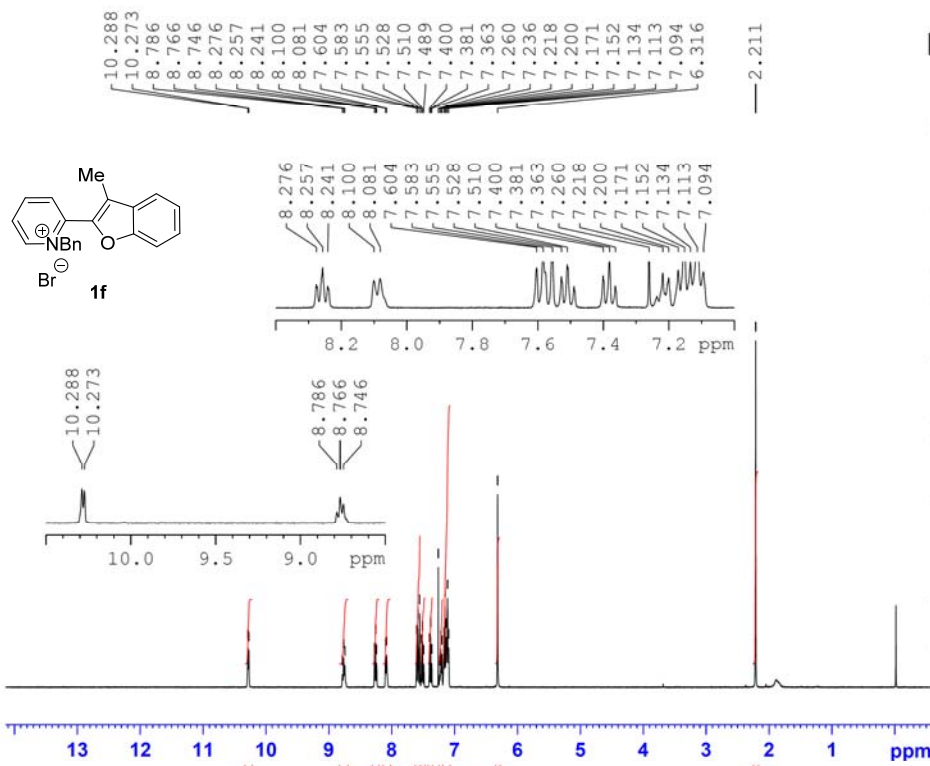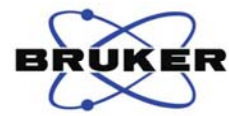

Current Data Parameters  
 NAME srl-00291  
 EXPNO 1  
 PROCNO 1

F2 - Acquisition Parameters  
 Date\_ 20171227  
 Time 15.21  
 INSTRUM spect  
 PROBHD 5 mm PABBO BB-  
 PULPROG zg10  
 TD 32768  
 SOLVENT CDCl3  
 NS 16  
 DS 4  
 SWH 5896.227 Hz  
 FIDRES 0.179939 Hz  
 AQ 2.7787263 sec  
 RG 575  
 DW 84.800 usec  
 DE 6.50 usec  
 TE 298.0 K  
 D1 2.00000000 sec  
 TD0 1

==== CHANNEL f1 =====  
 SFO1 400.1327209 MHz  
 NUC1 1H  
 P1 15.00 usec  
 PLW1 10.50000000 W

F2 - Processing parameters  
 SI 65536  
 SF 400.1300101 MHz  
 WDW EM  
 SSB 0  
 LB 0.05 Hz  
 GB 0  
 PC 1.00

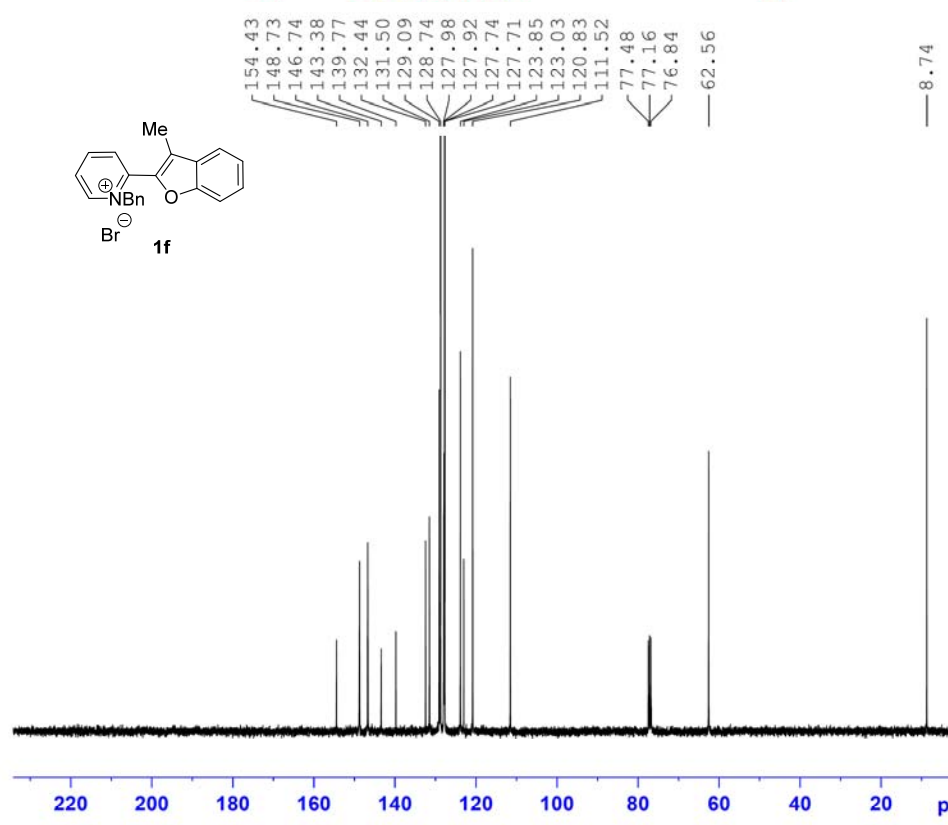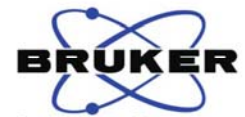

Current Data Parameters  
 NAME srl-00291  
 EXPNO 2  
 PROCNO 1

F2 - Acquisition Parameters  
 Date\_ 20171201  
 Time 18.17  
 INSTRUM spect  
 PROBHD 5 mm PABBO BB-  
 PULPROG zgpg  
 TD 32768  
 SOLVENT CDCl3  
 NS 200  
 DS 4  
 SWH 24038.461 Hz  
 FIDRES 0.733596 Hz  
 AQ 0.6815744 sec  
 RG 2050  
 DW 20.800 usec  
 DE 6.50 usec  
 TE 298.0 K  
 D1 2.00000000 sec  
 D11 0.03000000 sec  
 TD0 1

==== CHANNEL f1 =====  
 SFO1 100.6243395 MHz  
 NUC1 13C  
 P1 10.90 usec  
 PLW1 43.00000000 W

==== CHANNEL f2 =====  
 SFO2 400.1316005 MHz  
 NUC2 1H  
 CPDPRG[2] waltz16  
 PCPD2 90.00 usec  
 PLW2 10.50000000 W  
 PLW12 0.29166999 W  
 PLW13 0.14670999 W

F2 - Processing parameters  
 SI 65536  
 SF 100.6127884 MHz  
 WDW EM  
 SSB 0  
 LB 1.00 Hz  
 GB 0  
 PC 1.40

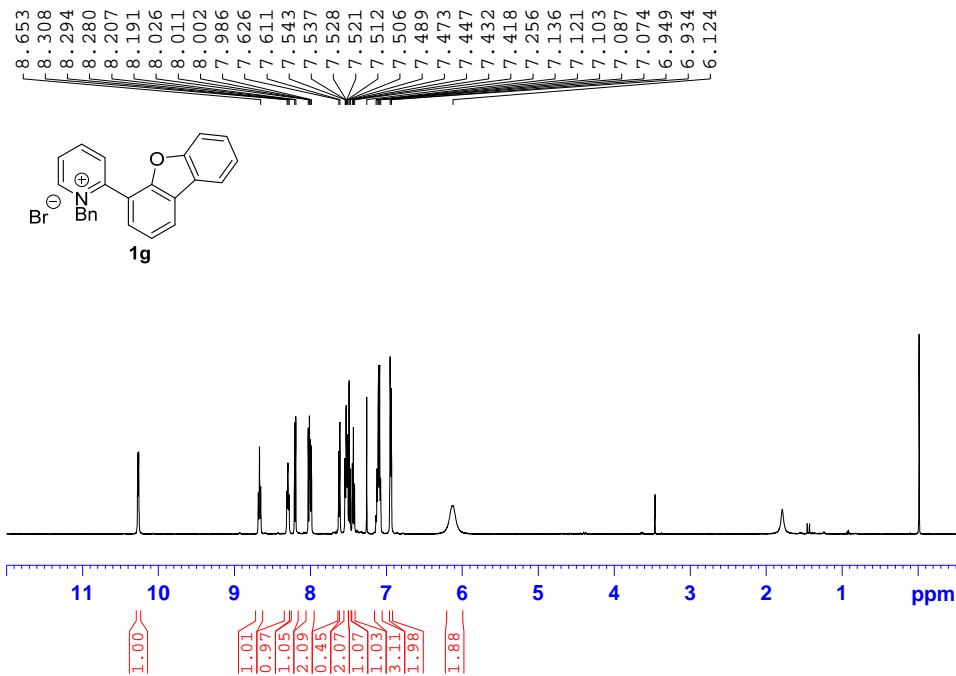

```
Current Data Parameters
NAME      10967-123
EXPNO    1
PROCNO   1

F2 - Acquisition Parameters
Date_    20170523
Time     17.08
INSTRUM spect
PROBHD   5 mm PABBO BB-
PULPROG zg10
TD       32768
SOLVENT  CDCl3
NS       16
DS       0
SWH      7500.000 Hz
FIDRES   0.22882 Hz
AQ       2.1845334 sec
RG       456
DW       66.667 usec
DE       6.50 usec
TE       299.0 K
D1       1.00000000 sec
TD0      1

===== CHANNEL f1 =====
SF01    500.1325007 MHz
NUC1     1H
P1       11.75 usec
PLW1    18.39999962 W

F2 - Processing parameters
SI       16384
SF       500.1300132 MHz
WDW      EM
SSB      0
LB       0.30 Hz
GB       0
PC       1.00
```

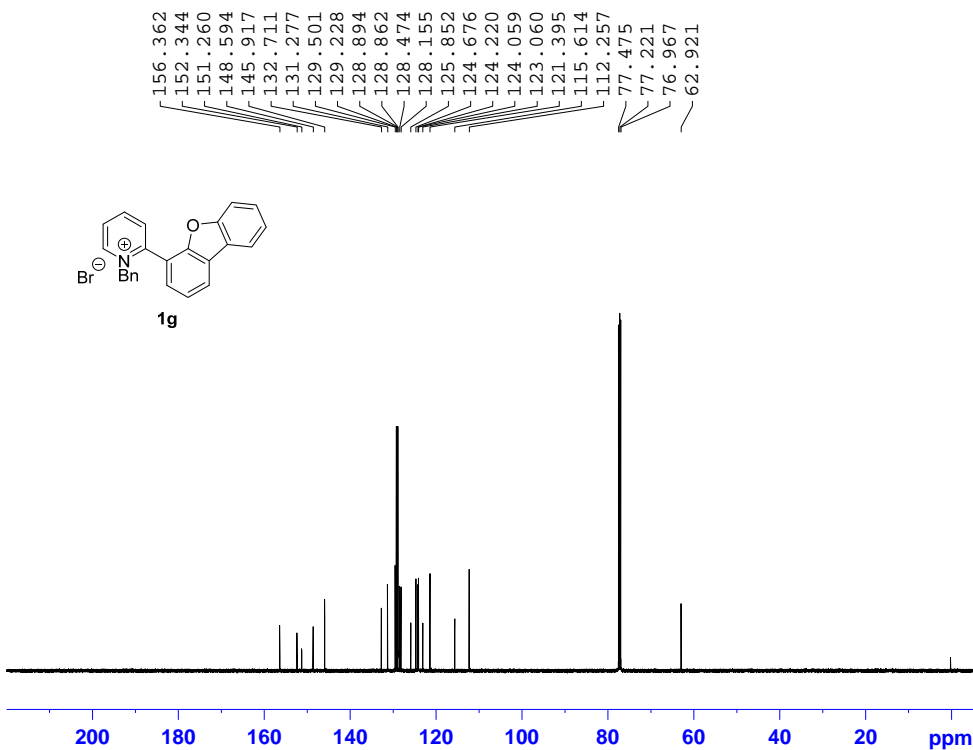

```
Current Data Parameters
NAME      10967-123
EXPNO    2
PROCNO   1

F2 - Acquisition Parameters
Date_    20170523
Time     21.15
INSTRUM spect
PROBHD   5 mm PABBO BB-
PULPROG zgpg
TD       262144
SOLVENT  CDCl3
NS       1500
DS       0
SWH      31250.000 Hz
FIDRES   0.119209 Hz
AQ       4.1943040 sec
RG       2050
DW       16.000 usec
DE       6.50 usec
TE       299.0 K
D1       1.00000000 sec
D11      0.03000000 sec
TD0      1

===== CHANNEL f1 =====
SF01    125.7698617 MHz
NUC1     13C
P1       9.75 usec
PLW1    126.00000000 W

===== CHANNEL f2 =====
SF02    500.1325007 MHz
NUC2     1H
CPDPRG[2] waltz16
PCPD2   80.00 usec
PLW2    18.39999962 W
PLW12   0.41056001 W
PLW13   0.20651001 W

F2 - Processing parameters
SI       131072
SF       125.7577670 MHz
WDW      EM
SSB      0
LB       0.30 Hz
GB       0
PC       1.40
```

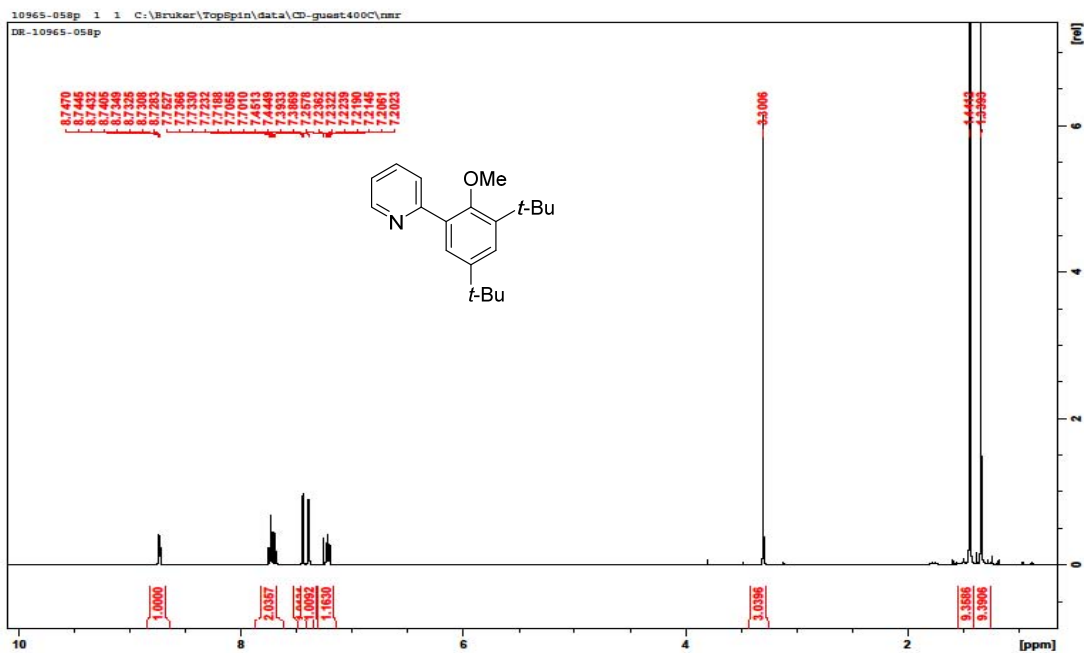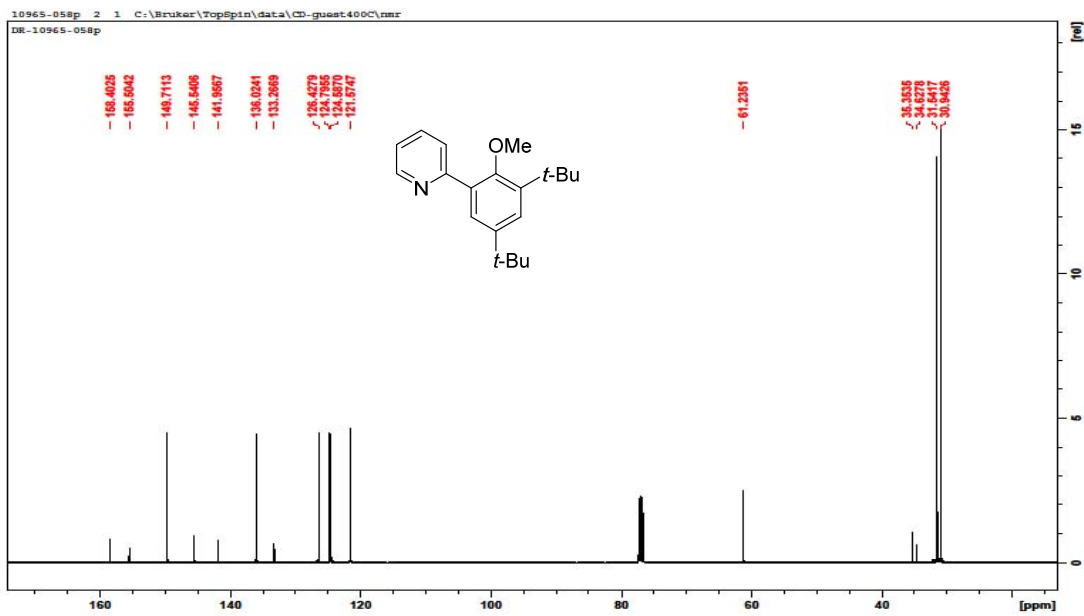



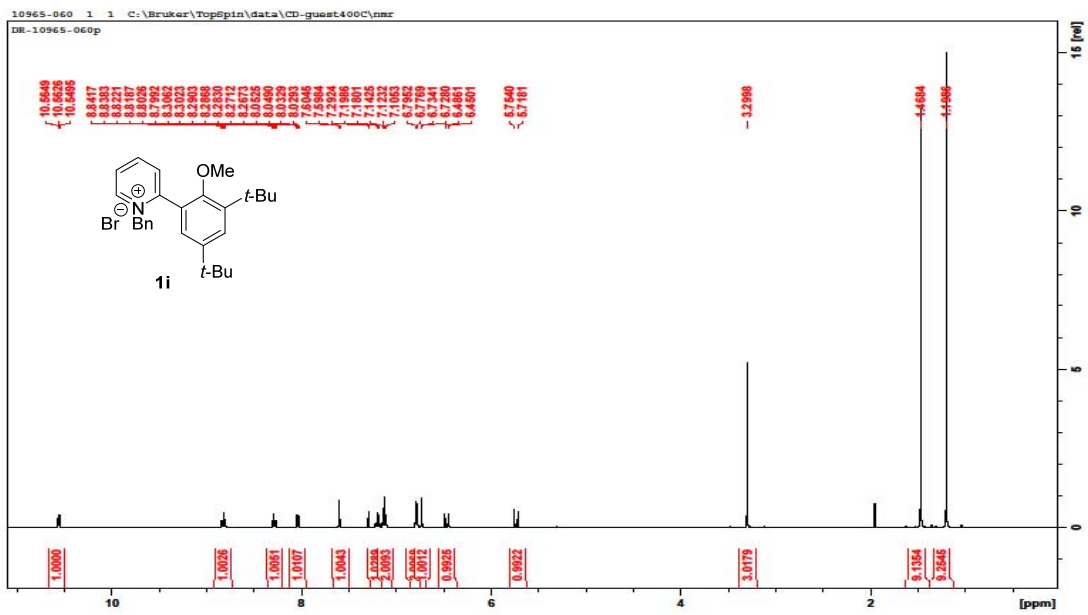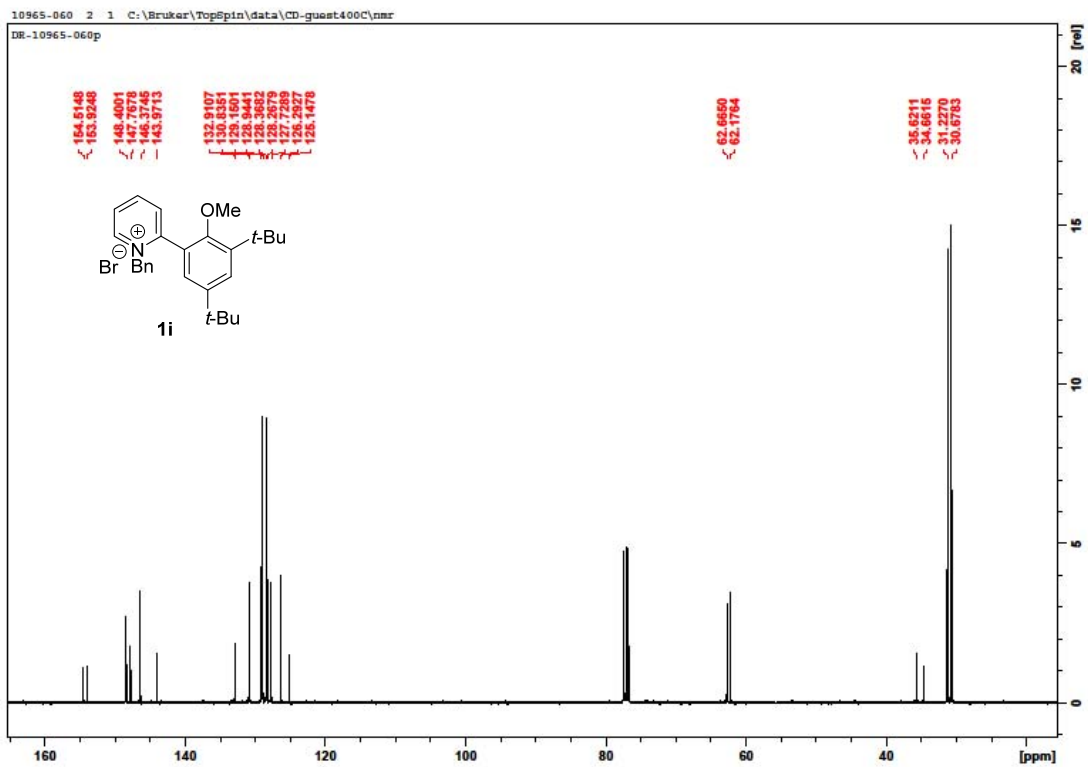

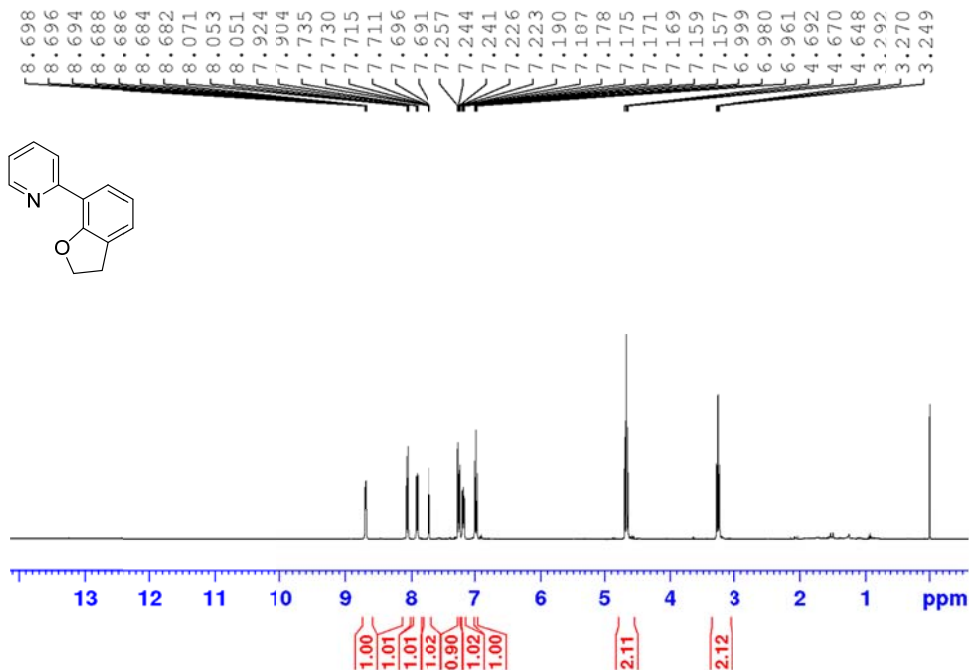

Current Data Parameters  
 NAME sb\_10945\_116  
 EXPNO 1  
 PROCNO 1

F2 - Acquisition Parameters  
 Date\_ 20170525  
 Time 22.37  
 INSTRUM spect  
 PROBHD 5 mm PABBO BB-  
 PULPROG zg10  
 TD 32768  
 SOLVENT CDCl3  
 NS 16  
 DS 4  
 SWH 5896.227 Hz  
 FIDRES 0.179939 Hz  
 AQ 2.7787263 sec  
 RG 575  
 DW 84.800 usec  
 DE 6.50 usec  
 TE 298.0 K  
 D1 2.00000000 sec  
 TDO 1

----- CHANNEL f1 -----  
 SFO1 400.1327209 MHz  
 NUC1 1H  
 P1 15.00 usec  
 PLW1 10.50000000 W

F2 - Processing parameters  
 SI 65536  
 SF 400.1300109 MHz  
 WDW EM  
 SSB 0  
 LB 0.05 Hz  
 GB 0  
 PC 1.00

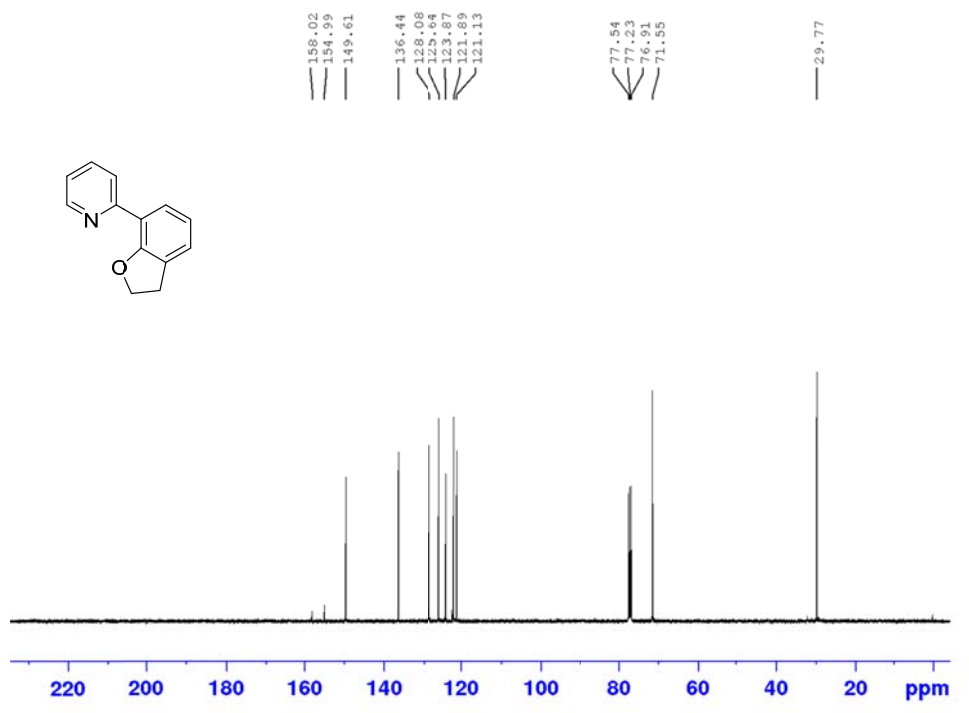

Current Data Parameters  
 NAME sb\_10945\_116  
 EXPNO 2  
 PROCNO 1

F2 - Acquisition Parameters  
 Date\_ 20170526  
 Time 0.38  
 INSTRUM spect  
 PROBHD 5 mm PABBO B8-  
 PULPROG zgpgg  
 TD 32768  
 SOLVENT CDCl3  
 NS 4096  
 DS 4  
 SWH 24038.461 Hz  
 FIDRES 0.733596 Hz  
 AQ 0.6815714 sec  
 RG 2050  
 DW 20.800 usec  
 DE 6.50 usec  
 TE 298.0 K  
 D1 1.00000000 sec  
 D11 0.03000000 sec  
 TDO 1

----- CHANNEL f1 -----  
 SFO1 100.6243395 MHz  
 NUC1 13C  
 P1 10.90 usec  
 PLW1 43.00000000 W

----- CHANNEL f2 -----  
 SFO2 400.1316005 MHz  
 NUC2 1H  
 CPDPRG[2] waltz16  
 PCPD2 90.00 usec  
 PLW2 10.50000000 W  
 PLW12 0.29166999 W  
 PLW13 0.14670999 W

F2 - Processing parameters  
 SI 65536  
 SF 100.6127496 MHz  
 WDW EM  
 SSB 0  
 LB 1.00 Hz  
 GB 0  
 PC 1.40

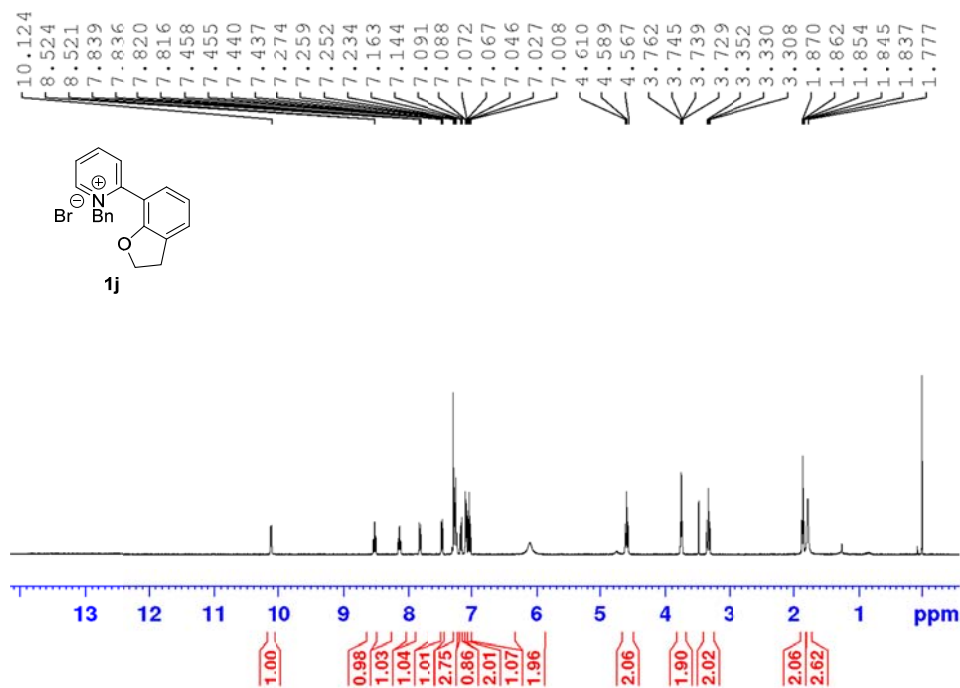

Current Data Parameters  
 NAME sb\_10945\_119  
 EXPNO 1  
 PROCNO 1

F2 - Acquisition Parameters  
 Date\_ 20170526  
 Time 0.43  
 INSTRUM spect  
 PROBHD 5 mm PABBO BB-  
 PULPROG zg10  
 TD 32768  
 SOLVENT CDCl3  
 NS 16  
 DS 4  
 SWH 5896.227 Hz  
 FIDRES 0.179939 Hz  
 AQ 2.7787263 sec  
 RG 645  
 DW 84.800 usec  
 DE 6.50 usec  
 TE 298.0 K  
 D1 2.0000000 sec  
 TDO 1

----- CHANNEL f1 -----  
 SFO1 400.1327209 MHz  
 NUC1 1H  
 P1 15.60 usec  
 PLW1 10.50000000 W

F2 - Processing parameters  
 SI 65536  
 SF 400.1300045 MHz  
 WDW EM  
 SSB 0  
 LB 0.05 Hz  
 GB 0  
 PC 1.00

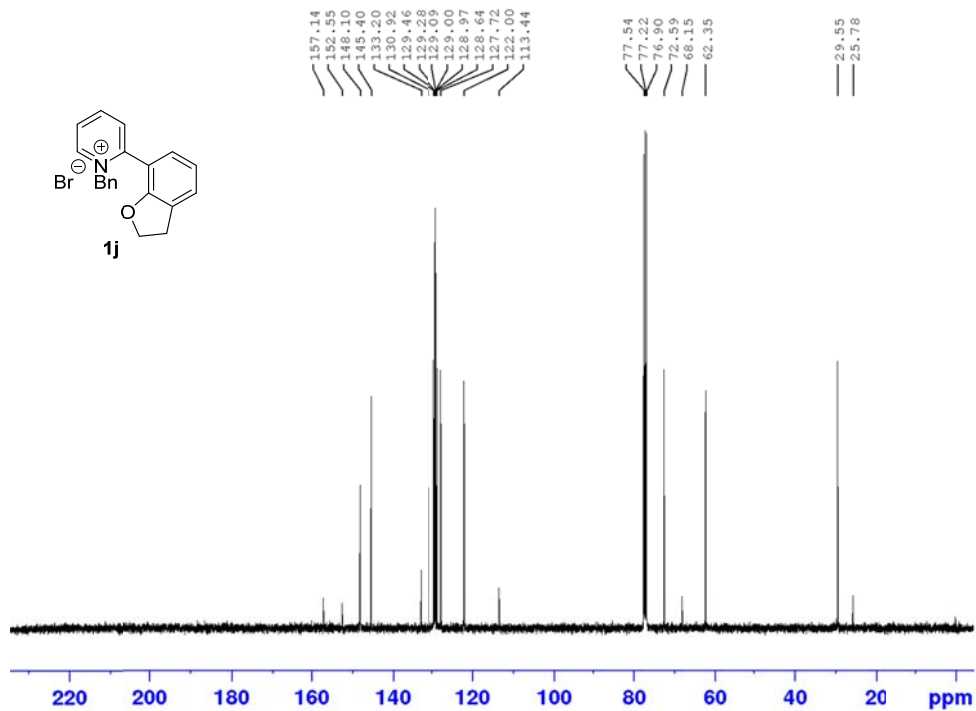

Current Data Parameters  
 NAME sb\_10945\_119  
 EXPNO 2  
 PROCNO 1

F2 - Acquisition Parameters  
 Date\_ 20170526  
 Time 2.44  
 INSTRUM spect  
 PROBHD 5 mm PABBO BB-  
 PULPROG zgpg  
 TD 32768  
 SOLVENT CDCl3  
 NS 4096  
 DS 4  
 SWH 24038.461 Hz  
 FIDRES 0.733596 Hz  
 AQ 0.6815744 sec  
 RG 2050  
 DW 20.800 usec  
 DE 6.50 usec  
 TE 298.0 K  
 D1 1.00000000 sec  
 D11 0.03000000 sec  
 TDO 1

----- CHANNEL f1 -----  
 SFO1 100.6243395 MHz  
 NUC1 13C  
 P1 10.90 usec  
 PLW1 43.00000000 W

----- CHANNEL f2 -----  
 SFO2 400.1316035 MHz  
 NUC2 1H  
 CPDPRG2 waltz16  
 PCPD2 90.00 usec  
 PLN2 10.50000000 W  
 PLN12 0.29166999 W  
 PLN13 0.14670999 W

F2 - Processing parameters  
 SI 65536  
 SF 100.6127511 MHz  
 WDW EM  
 SSB 0  
 LB 1.00 Hz  
 GB 0  
 PC 1.40

8.673  
8.665  
7.942  
7.927  
7.843  
7.827  
7.817  
7.637  
7.602  
7.589  
7.586  
7.351  
7.348  
7.336  
7.321  
7.321  
7.317  
7.272  
7.256  
7.241  
7.146  
7.144  
7.131  
7.030  
7.015  
7.001  
6.985  
6.954  
6.938

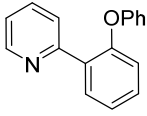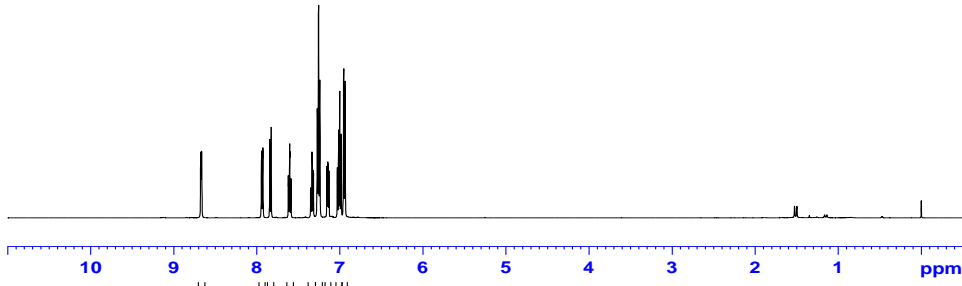

157.486  
154.170  
151.665  
149.584  
135.876  
132.154  
131.515  
130.047  
129.719  
124.782  
124.280  
122.896  
122.001  
120.099  
118.221

77.347  
77.093  
76.838

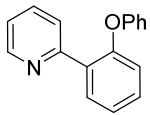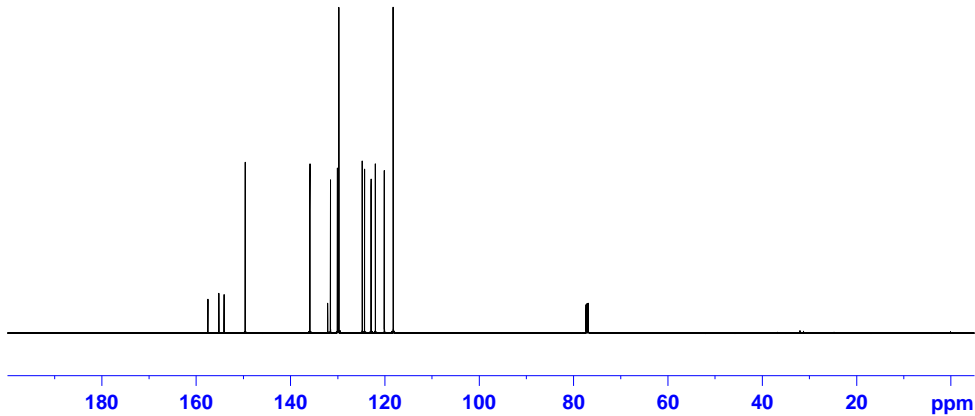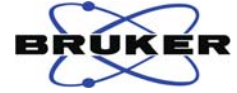

```
Current Data Parameters
NAME      ovz1-00025-d
EXPNO    1
PROCNO   1

F2 - Acquisition Parameters
Date_    20170105
Time     20.41
INSTRUM  spect
PROBHD   5 mm PABBO BB/
PULPROG  zg30
TD       32768
SOLVENT  CDCl3
NS       16
DS       0
SWH      7500.000 Hz
FIDRES   0.228882 Hz
AQ       2.1845334 sec
RG       228
DW       66.667 usec
DE       6.50 usec
TE       299.0 K
D1       1.0000000 sec
TDO      1

===== CHANNEL f1 =====
SF01    500.1325007 MHz
NUC1     1H
P1       14.00 usec
PLW1    18.79999924 W

F2 - Processing parameters
SI       16384
SF       500.1300223 MHz
WDW      EM
SSB      0
LB       0.30 Hz
GB       0
PC       1.00
```

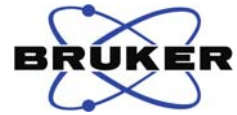

```
Current Data Parameters
NAME      ovz1-00025-d
EXPNO    2
PROCNO   1

F2 - Acquisition Parameters
Date_    20170105
Time     22.12
INSTRUM  spect
PROBHD   5 mm PABBO BB/
PULPROG  zgpg
TD       262144
SOLVENT  CDCl3
NS       1024
DS       0
SWH      31250.000 Hz
FIDRES   0.119209 Hz
AQ       4.1943040 sec
RG       2050
DW       16.000 usec
DE       6.50 usec
TE       299.0 K
D1       1.0000000 sec
D11      0.0300000 sec
TDO      1

===== CHANNEL f1 =====
SF01    125.7698617 MHz
NUC1     13C
P1       10.00 usec
PLW1    99.50000000 W

===== CHANNEL f2 =====
SFO2    500.1325007 MHz
NUC2     1H
CPDPRG[2] waltz16
PCPD2   80.00 usec
PLW2    18.79999924 W
PLW12   0.57574999 W
PLW13   0.28960001 W

F2 - Processing parameters
SI       131072
SF       125.7577890 MHz
WDW      EM
SSB      0
LB       0.30 Hz
GB       0
PC       1.40
```

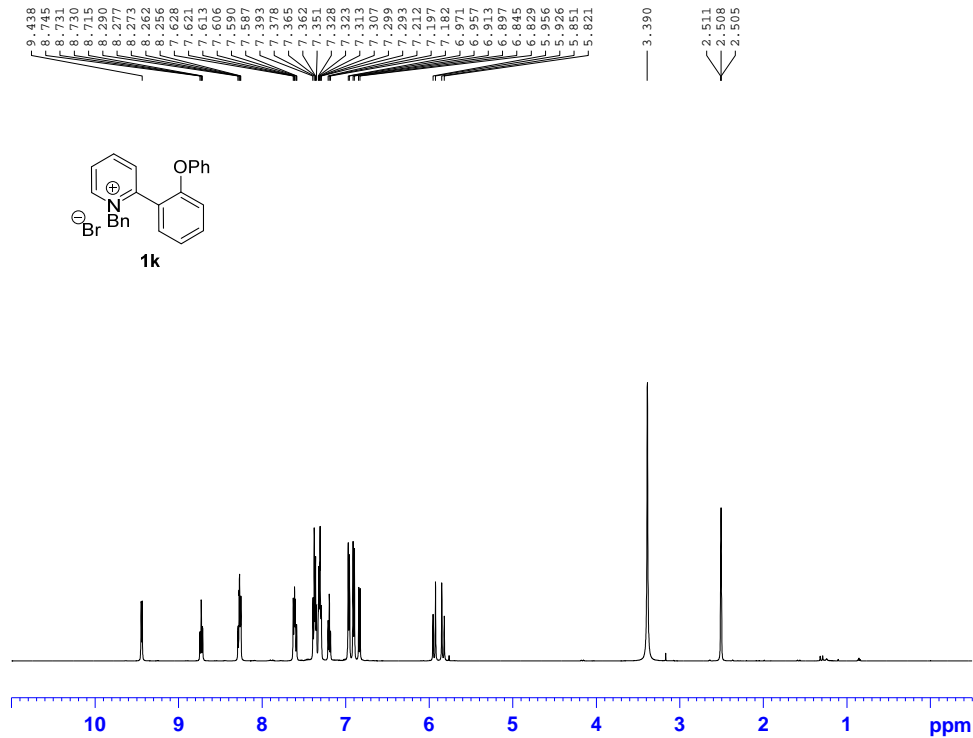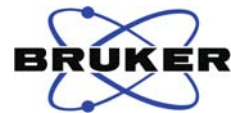

Current Data Parameters  
 NAME ovz1-00028-d  
 EXPNO 2  
 PROCNO 1

F2 - Acquisition Parameters  
 Date\_ 20170104  
 Time 20.37  
 INSTRUM spect  
 PROBHD 5 mm PABBO BB/  
 PULPROG zg30  
 TD 32768  
 SOLVENT DMSO  
 NS 16  
 DS 0  
 SWH 7002.801 Hz  
 FIDRES 0.213709 Hz  
 AQ 2.3396351 sec  
 RG 144  
 DW 71.400 usec  
 DE 6.50 usec  
 TE 299.1 K  
 D1 1.00000000 sec  
 TD0 1

==== CHANNEL f1 =====  
 SFO1 500.1330008 MHz  
 NUC1 1H  
 P1 14.00 usec  
 PLW1 18.79999924 W

F2 - Processing parameters  
 SI 16384  
 SF 500.1300000 MHz  
 WDW EM  
 SSB 0  
 LB 1.00 Hz  
 GB 0  
 PC 1.00

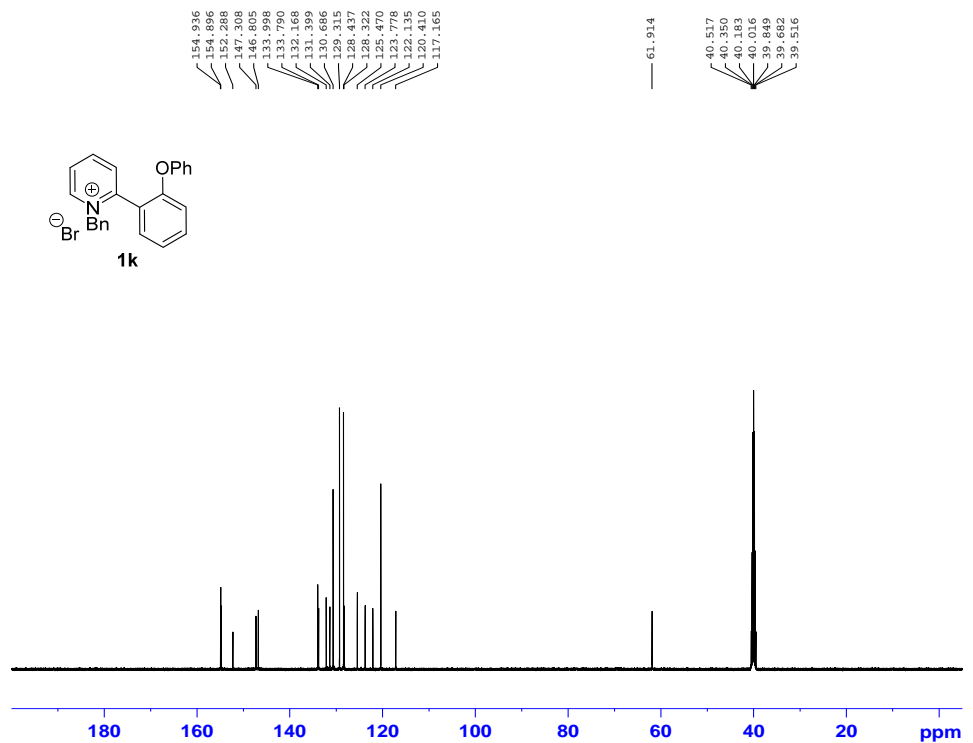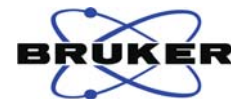

Current Data Parameters  
 NAME ovz1-00028-d  
 EXPNO 3  
 PROCNO 1

F2 - Acquisition Parameters  
 Date\_ 20170104  
 Time 22.07  
 INSTRUM spect  
 PROBHD 5 mm PABBO BB/  
 PULPROG zgpg  
 TD 262144  
 SOLVENT DMSO  
 NS 1024  
 DS 0  
 SWH 31250.000 Hz  
 FIDRES 0.119209 Hz  
 AQ 4.1943040 sec  
 RG 2050  
 DW 16.000 usec  
 DE 6.50 usec  
 TE 299.0 K  
 D1 1.00000000 sec  
 D11 0.03000000 sec  
 TD0 1

==== CHANNEL f1 =====  
 SFO1 125.7698617 MHz  
 NUC1 13C  
 P1 10.00 usec  
 PLW1 99.50000000 W

==== CHANNEL f2 =====  
 SFO2 500.1325007 MHz  
 NUC2 1H  
 CPDPRG[2] waltz16  
 PCPD2 80.00 usec  
 PLW2 18.79999924 W  
 PLW12 0.57574999 W  
 PLW13 0.28960001 W

F2 - Processing parameters  
 SI 131072  
 SF 125.7577890 MHz  
 WDW EM  
 SSB 0  
 LB 0.30 Hz  
 GB 0  
 PC 1.40

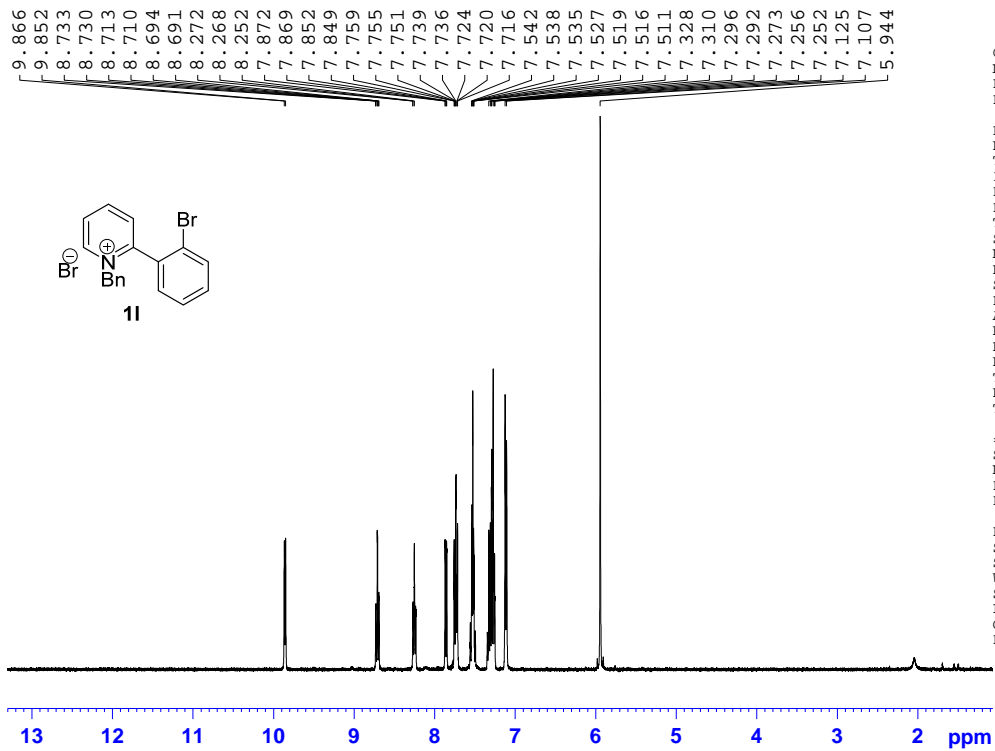

Current Data Parameters  
 NAME 10933-107  
 EXPNO 1  
 PROCNO 1

F2 - Acquisition Parameters  
 Date\_ 20160902  
 Time 17.04  
 INSTRUM spect  
 PROBHD 5 mm PABBO BB-  
 PULPROG zg10  
 TD 32768  
 SOLVENT CDCl3  
 NS 4  
 DS 4  
 SWH 5896.227 Hz  
 FIDRES 0.179939 Hz  
 AQ 2.7787263 sec  
 RG 406  
 DW 84.800 usec  
 DE 6.50 usec  
 TE 298.0 K  
 D1 2.00000000 sec  
 TD0 1

==== CHANNEL f1 =====  
 SFO1 400.1327209 MHz  
 NUC1 1H  
 P1 15.00 usec  
 PLW1 10.50000000 W

F2 - Processing parameters  
 SI 65536  
 SF 400.1299958 MHz  
 WDW EM  
 SSB 0  
 LB 0.05 Hz  
 GB 0  
 PC 1.00

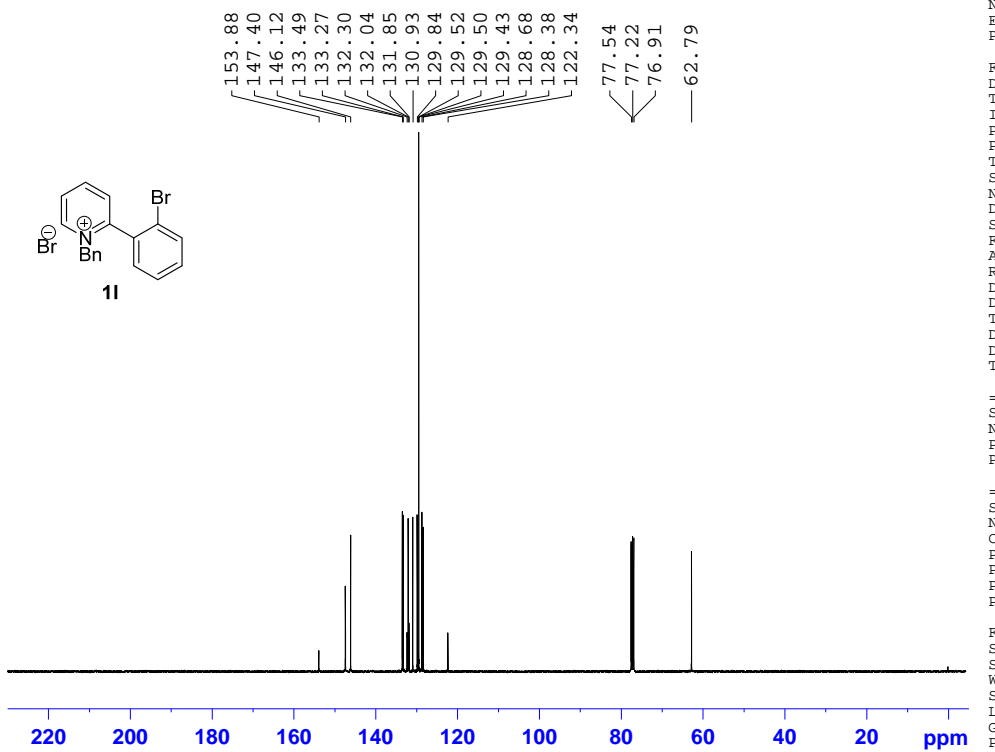

Current Data Parameters  
 NAME 10933-107  
 EXPNO 3  
 PROCNO 1

F2 - Acquisition Parameters  
 Date\_ 20160902  
 Time 20.59  
 INSTRUM spect  
 PROBHD 5 mm PABBO BB-  
 PULPROG zgpg  
 TD 32768  
 SOLVENT CDCl3  
 NS 2500  
 DS 4  
 SWH 24038.461 Hz  
 FIDRES 0.733596 Hz  
 AQ 0.6815744 sec  
 RG 2050  
 DW 20.800 usec  
 DE 6.50 usec  
 TE 298.0 K  
 D1 2.00000000 sec  
 D11 0.03000000 sec  
 TD0 1

==== CHANNEL f1 =====  
 SFO1 100.6243395 MHz  
 NUC1 13C  
 P1 10.90 usec  
 PLW1 43.00000000 W

==== CHANNEL f2 =====  
 SFO2 400.1316005 MHz  
 NUC2 1H  
 CPDPRG[2] waltz16  
 PCPD2 90.00 usec  
 PLW2 10.50000000 W  
 PLW12 0.29166999 W  
 PLW13 0.14670999 W

F2 - Processing parameters  
 SI 65536  
 SF 100.6127561 MHz  
 WDW EM  
 SSB 0  
 LB 1.00 Hz  
 GB 0  
 PC 1.40

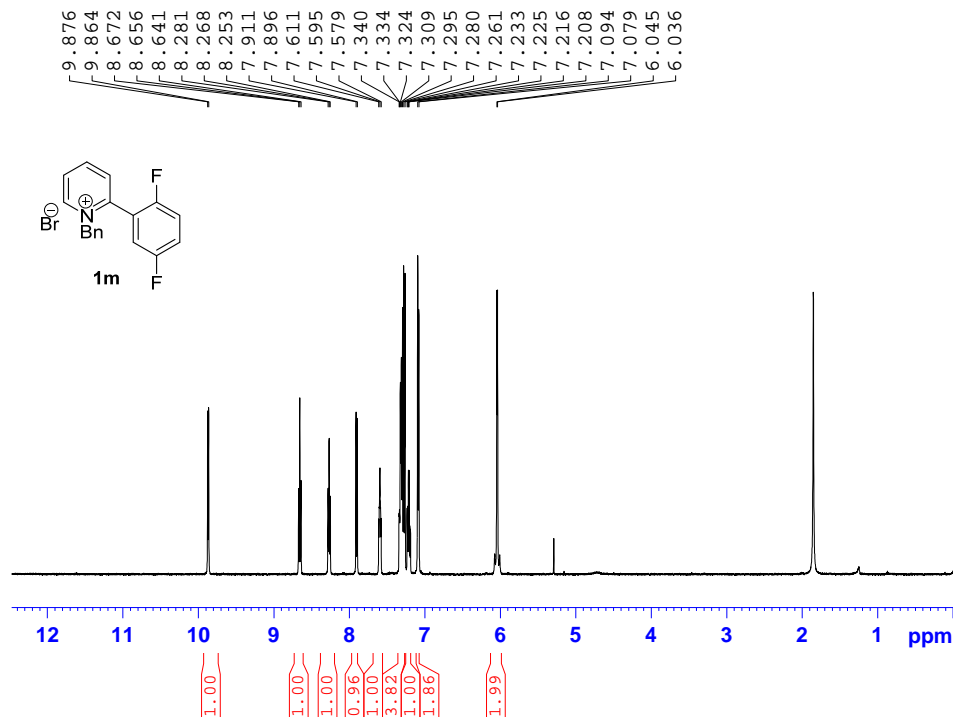

Current Data Parameters  
NAME 10967-037  
EXPNO 1  
PROCNO 1

F2 - Acquisition Parameters  
Date\_ 20170106  
Time 18.20  
INSTRUM spect  
PROBHD 5 mm PABBO BB/  
PULPROG zg10  
TD 32768  
SOLVENT CDCl3  
NS 16  
DS 0  
SWH 7500.000 Hz  
FIDRES 0.228882 Hz  
AQ 2.1845334 sec  
RG 812  
DW 66.667 usec  
DE 6.50 usec  
TE 299.0 K  
D1 1.0000000 sec  
TD0 1

==== CHANNEL f1 =====  
SF01 500.1325007 MHz  
NUC1 1H  
P1 14.00 usec  
PLW1 18.79999924 W

F2 - Processing parameters  
SI 16384  
SF 500.1300120 MHz  
WDW EM  
SSB 0  
LB 0.30 Hz  
GB 0  
PC 1.00

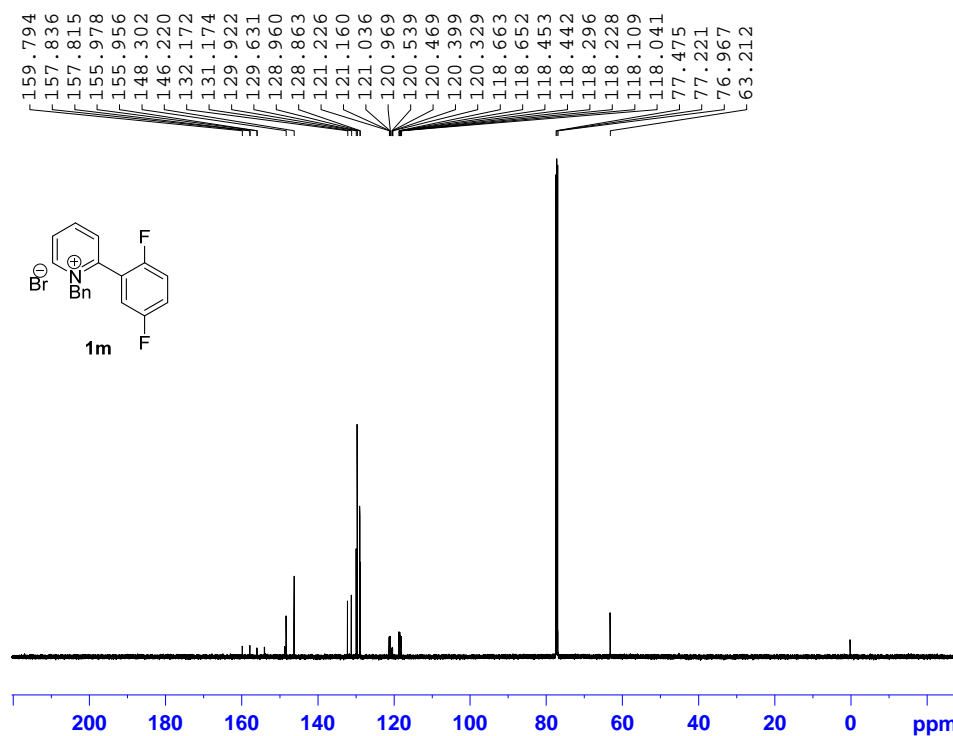

Current Data Parameters  
NAME 10967-037  
EXPNO 2  
PROCNO 1

F2 - Acquisition Parameters  
Date\_ 20170107  
Time 6.01  
INSTRUM spect  
PROBHD 5 mm PABBO BB/  
PULPROG zgpg  
TD 262144  
SOLVENT CDCl3  
NS 1500  
DS 0  
SWH 31250.000 Hz  
FIDRES 0.119209 Hz  
AQ 4.1943040 sec  
RG 2050  
DW 16.000 usec  
DE 6.50 usec  
TE 299.1 K  
D1 1.0000000 sec  
D11 0.0300000 sec  
TD0 1

==== CHANNEL f1 =====  
SF01 125.7698617 MHz  
NUC1 13C  
P1 10.00 usec  
PLW1 99.50000000 W

==== CHANNEL f2 =====  
SF02 500.1325007 MHz  
NUC2 1H  
CPDPRG[2] waltz16  
PCPD2 80.00 usec  
PLW2 18.79999924 W  
PLW12 0.57574999 W  
PLW13 0.28960001 W

F2 - Processing parameters  
SI 131072  
SF 125.7577656 MHz  
WDW EM  
SSB 0  
LB 0.30 Hz  
GB 0  
PC 1.40

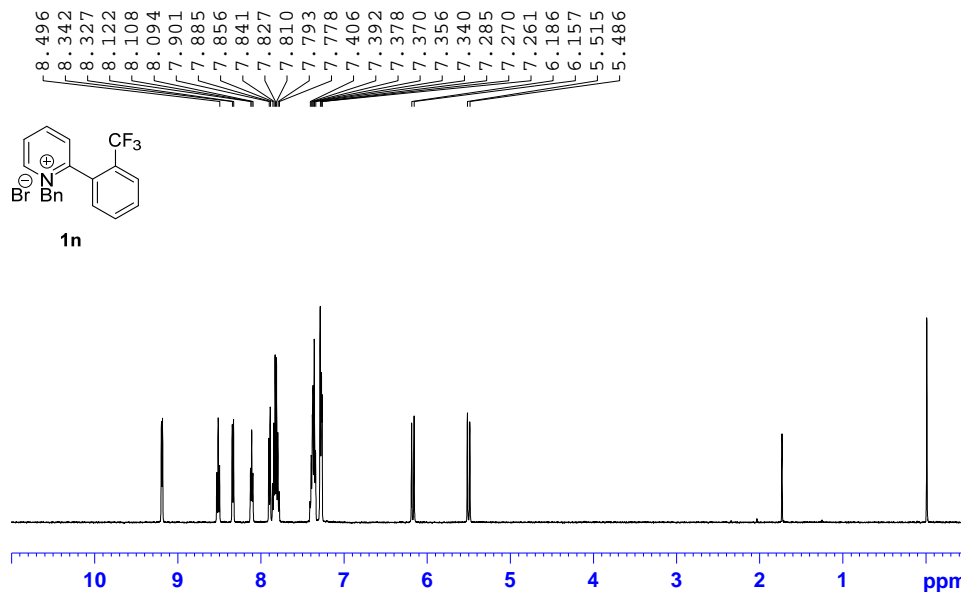

```

Current Data Parameters
NAME      10933-190
EXPNO    1
PROCNO   1

F2 - Acquisition Parameters
Date_    20161115
Time     16.47
INSTRUM  spect
PROBHD   5 mm PABBO BB/
PULPROG  zg10
TD       32768
SOLVENT  CDCl3
NS       16
DS       0
SWH      7500.000 Hz
FIDRES   0.228882 Hz
AQ       2.1845334 sec
RG       812
DW       66.667 usec
DE       6.50 usec
TE       298.9 K
D1       1.00000000 sec
TD0      1

===== CHANNEL f1 =====
SFO1     500.1325007 MHz
NUC1     1H
P1       14.00 usec
PLW1     18.79999924 W

F2 - Processing parameters
SI       16384
SF       500.1300113 MHz
WDW      EM
SSB      0
LB       0.30 Hz
GB       0
PC       1.00
  
```

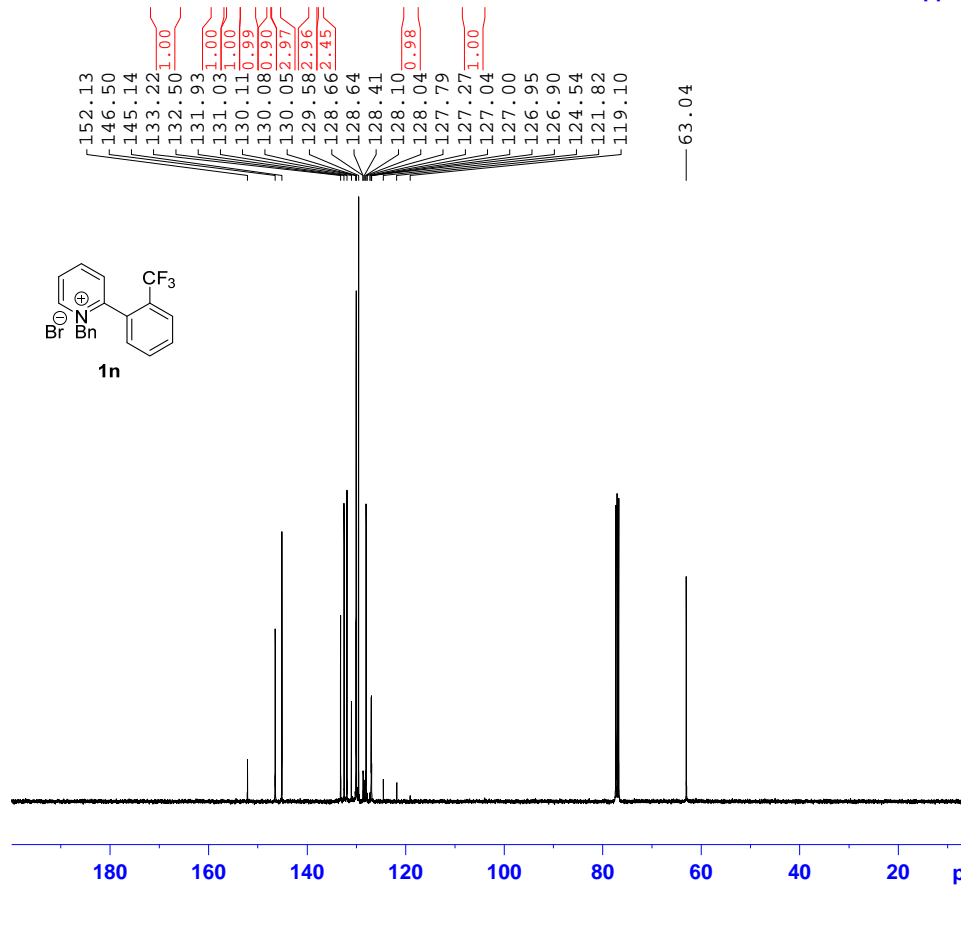

```

Current Data Parameters
NAME      10933-190-p
EXPNO    3
PROCNO   1

F2 - Acquisition Parameters
Date_    20180206
Time     5.04
INSTRUM  spect
PROBHD   5 mm PABBO BB-
PULPROG  zgpgg
TD       32768
SOLVENT  CDCl3
NS       3072
DS       4
SWH      24038.461 Hz
FIDRES   0.733596 Hz
AQ       0.6815744 sec
RG       2050
DW       20.800 usec
DE       6.50 usec
TE       298.0 K
D1       2.00000000 sec
D11      0.03000000 sec
TD0      1

===== CHANNEL f1 =====
SFO1     100.6243395 MHz
NUC1     13C
P1       10.90 usec
PLW1     43.00000000 W

===== CHANNEL f2 =====
SFO2     400.1316005 MHz
NUC2     1H
CPDPRG[2] waltz16
PCPD2    90.00 usec
PLW2     10.50000000 W
PLW12    0.29166999 W
PLW13    0.14670999 W

F2 - Processing parameters
SI       65536
SF       100.6127690 MHz
WDW      EM
SSB      0
LB       1.00 Hz
GB       0
PC       1.40
  
```



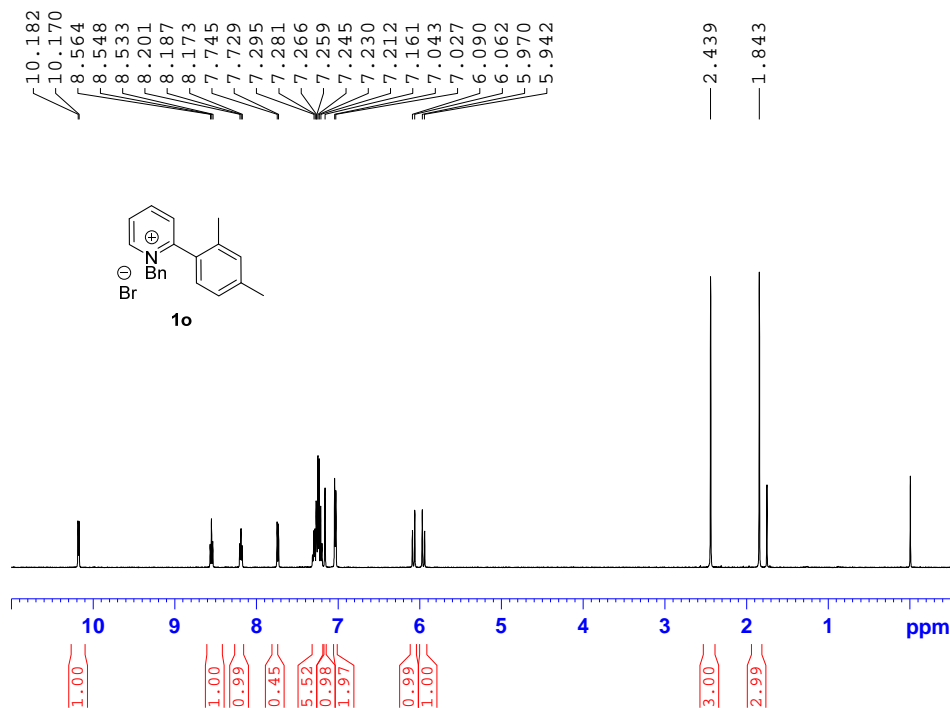

Current Data Parameters  
 NAME 10933-174  
 EXPNO 1  
 PROCNO 1

F2 - Acquisition Parameters  
 Date\_ 20161109  
 Time 18.02  
 INSTRUM spect  
 PROBHD 5 mm PABBO BB/  
 PULPROG zg10  
 TD 32768  
 SOLVENT CDCl3  
 NS 16  
 DS 0  
 SWH 7500.000 Hz  
 FIDRES 0.228882 Hz  
 AQ 2.1845334 sec  
 RG 724  
 DW 66.667 usec  
 DE 6.50 usec  
 TE 299.0 K  
 D1 1.00000000 sec  
 TD0 1

==== CHANNEL f1 =====  
 SFO1 500.1325007 MHz  
 NUC1 1H  
 P1 14.00 usec  
 PLW1 18.79999924 W

F2 - Processing parameters  
 SI 16384  
 SF 500.1300080 MHz  
 WDW EM  
 SSB 0  
 LB 0.30 Hz  
 GB 0  
 PC 1.00

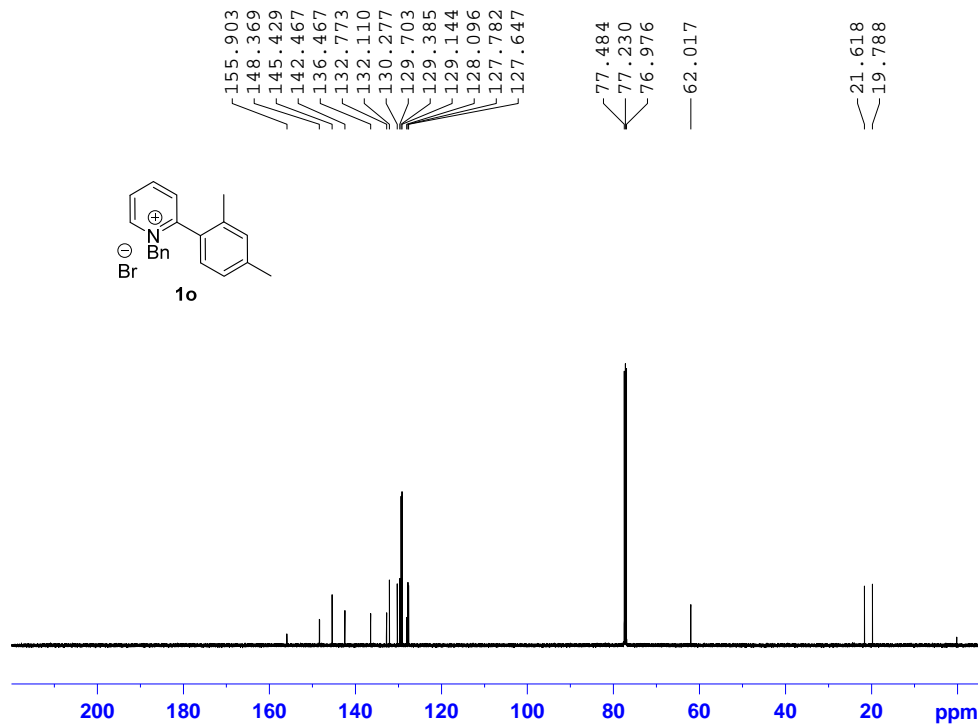

Current Data Parameters  
 NAME 10933-174  
 EXPNO 2  
 PROCNO 1

F2 - Acquisition Parameters  
 Date\_ 20161109  
 Time 19.34  
 INSTRUM spect  
 PROBHD 5 mm PABBO BB/  
 PULPROG zgpg  
 TD 262144  
 SOLVENT CDCl3  
 NS 1024  
 DS 0  
 SWH 31250.000 Hz  
 FIDRES 0.119209 Hz  
 AQ 4.1943040 sec  
 RG 2050  
 DW 16.000 usec  
 DE 6.50 usec  
 TE 299.0 K  
 D1 1.00000000 sec  
 D11 0.03000000 sec  
 TD0 1

==== CHANNEL f1 =====  
 SFO1 125.7698617 MHz  
 NUC1 13C  
 P1 10.00 usec  
 PLW1 99.50000000 W

==== CHANNEL f2 =====  
 SFO2 500.1325007 MHz  
 NUC2 1H  
 CPDPRG[2] waltz16  
 PCPD2 80.00 usec  
 PLW2 18.79999924 W  
 PLW12 0.57574999 W  
 PLW13 0.28960001 W

F2 - Processing parameters  
 SI 131072  
 SF 125.7577649 MHz  
 WDW EM  
 SSB 0  
 LB 0.30 Hz  
 GB 0  
 PC 1.40

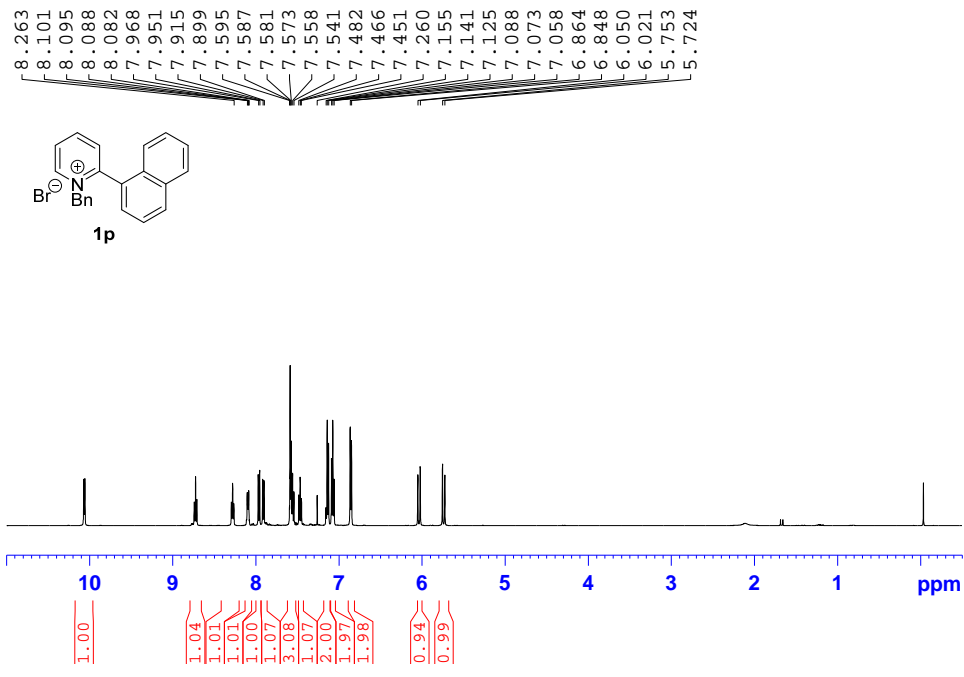

```

Current Data Parameters
NAME          10963-049
EXPNO         1
PROCNO        1

F2 - Acquisition Parameters
Date_         20170512
Time          11.40
INSTRUM       spect
PROBHD         5 mm PABBO BB-
PULPROG        zg10
TD             32768
SOLVENT        CDCl3
NS             64
DS             0
SWH            7500.000 Hz
FIDRES         0.228882 Hz
AQ             2.1845334 sec
RG             287
DW             66.667 usec
DE             6.50 usec
TE             299.0 K
D1             1.00000000 sec
TD0            1

===== CHANNEL f1 =====
SF01          500.1325007 MHz
NUC1           1H
P1             11.75 usec
PLW1          18.39999962 W

F2 - Processing parameters
SI             16384
SF            500.1300118 MHz
WDW            EM
SSB            0
LB             0.30 Hz
GB             0
PC             1.00
  
```

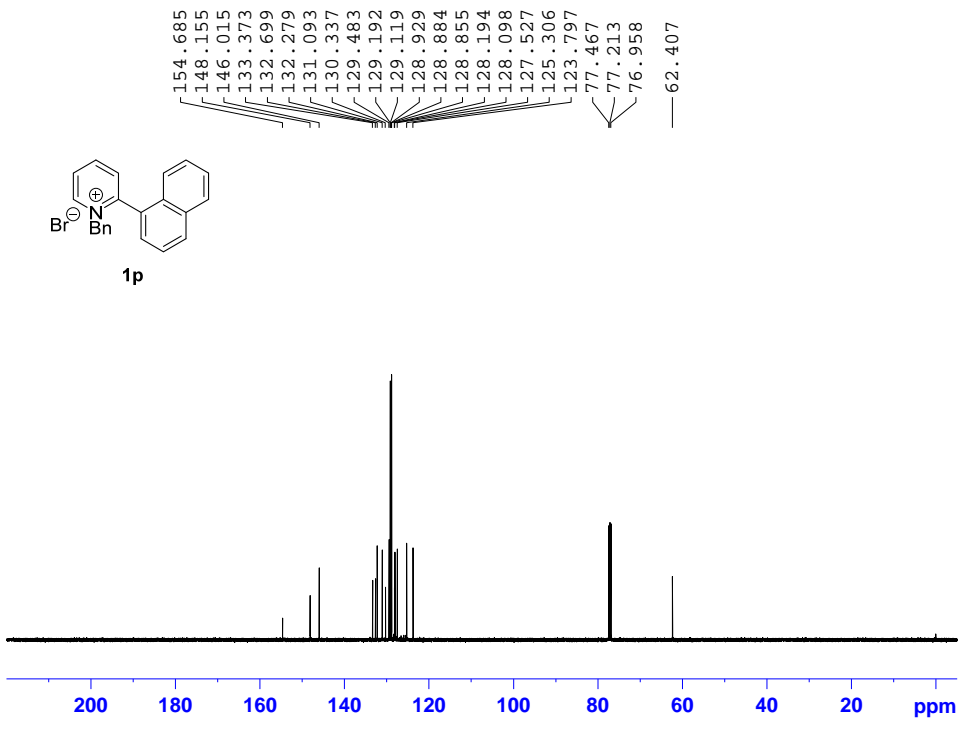

```

Current Data Parameters
NAME          10963-049
EXPNO         2
PROCNO        1

F2 - Acquisition Parameters
Date_         20170512
Time          11.55
INSTRUM       spect
PROBHD         5 mm PABBO BB-
PULPROG        zgpg
TD             262144
SOLVENT        CDCl3
NS             160
DS             0
SWH            31250.000 Hz
FIDRES         0.119209 Hz
AQ             4.1943040 sec
RG             2050
DW             16.000 usec
DE             6.50 usec
TE             299.0 K
D1             1.00000000 sec
D11            0.03000000 sec
TD0            1

===== CHANNEL f1 =====
SF01          125.7698617 MHz
NUC1           13C
P1             9.75 usec
PLW1          126.00000000 W

===== CHANNEL f2 =====
SF02          500.1325007 MHz
NUC2           1H
PCPD2         waltz16
PLW2          18.39999962 W
PLW12         0.41056001 W
PLW13         0.20651001 W

F2 - Processing parameters
SI             131072
SF            125.7577751 MHz
WDW            EM
SSB            0
LB             0.30 Hz
GB             0
PC             1.40
  
```

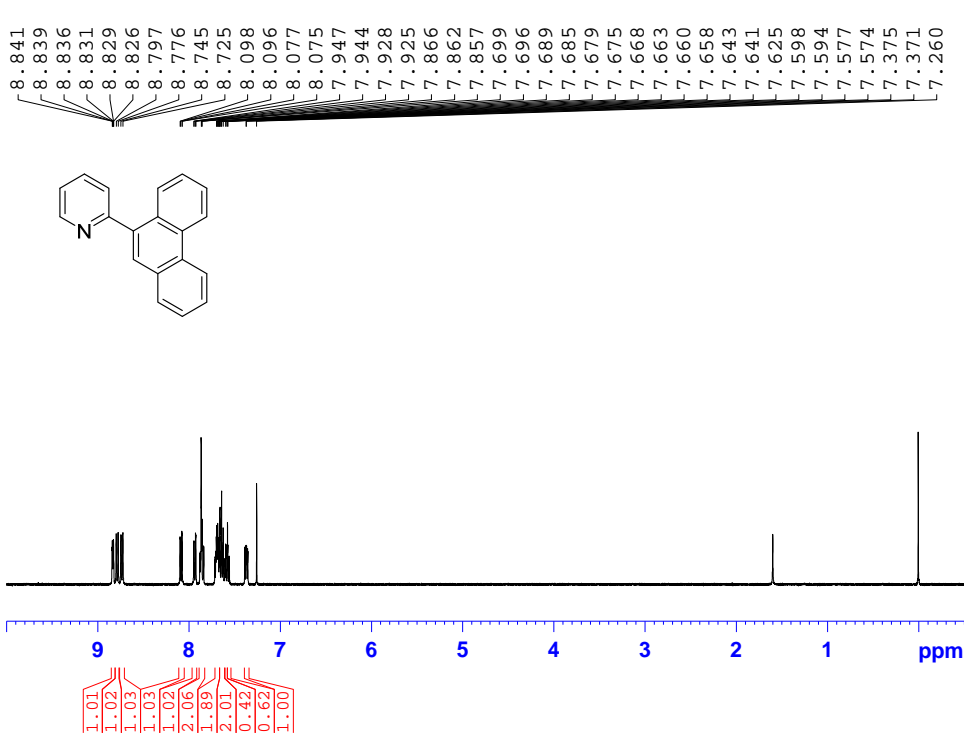

Current Data Parameters  
 NAME 10967-031  
 EXPNO 1  
 PROCNO 1

F2 - Acquisition Parameters  
 Date\_ 20170523  
 Time 16.55  
 INSTRUM spect  
 PROBHD 5 mm PABBO BB-  
 PULPROG zg10  
 TD 32768  
 SOLVENT CDCl3  
 NS 4  
 DS 4  
 SWH 5896.227 Hz  
 FIDRES 0.179939 Hz  
 AQ 2.7787263 sec  
 RG 645  
 DW 84.800 usec  
 DE 6.50 usec  
 TE 298.0 K  
 D1 2.00000000 sec  
 TD0 1

===== CHANNEL f1 =====  
 SFO1 400.1327209 MHz  
 NUC1 1H  
 P1 15.00 usec  
 PLW1 10.50000000 W

F2 - Processing parameters  
 SI 65536  
 SF 400.1300098 MHz  
 WDW EM  
 SSB 0  
 LB 0.05 Hz  
 GB 0  
 PC 1.00

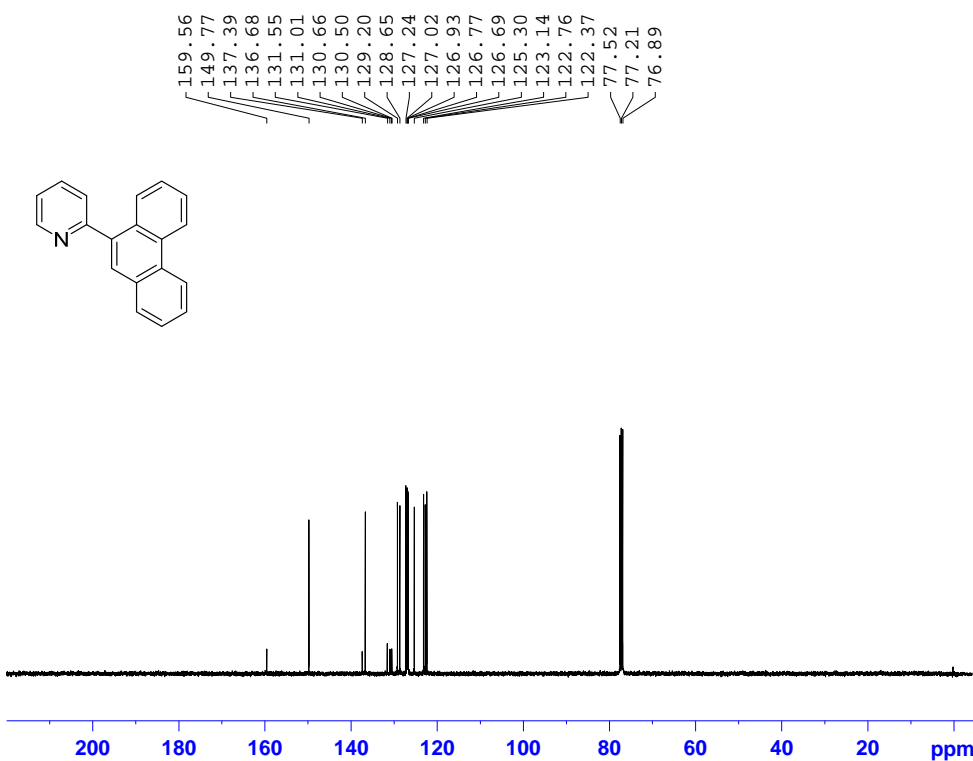

Current Data Parameters  
 NAME 10967-031  
 EXPNO 2  
 PROCNO 1

F2 - Acquisition Parameters  
 Date\_ 20170523  
 Time 20.59  
 INSTRUM spect  
 PROBHD 5 mm PABBO BB-  
 PULPROG zgpg  
 TD 32768  
 SOLVENT CDCl3  
 NS 2500  
 DS 4  
 SWH 24038.461 Hz  
 FIDRES 0.733596 Hz  
 AQ 0.6815744 sec  
 RG 2050  
 DW 20.800 usec  
 DE 6.50 usec  
 TE 298.0 K  
 D1 2.00000000 sec  
 D11 0.03000000 sec  
 TD0 1

===== CHANNEL f1 =====  
 SFO1 100.6243395 MHz  
 NUC1 13C  
 P1 10.90 usec  
 PLW1 43.00000000 W

===== CHANNEL f2 =====  
 SFO2 400.1316005 MHz  
 NUC2 1H  
 CPDPRG[2] waltz16  
 PCPD2 90.00 usec  
 PLW2 10.50000000 W  
 PLW12 0.29166999 W  
 PLW13 0.14670999 W

F2 - Processing parameters  
 SI 65536  
 SF 100.6127509 MHz  
 WDW EM  
 SSB 0  
 LB 1.00 Hz  
 GB 0  
 PC 1.40

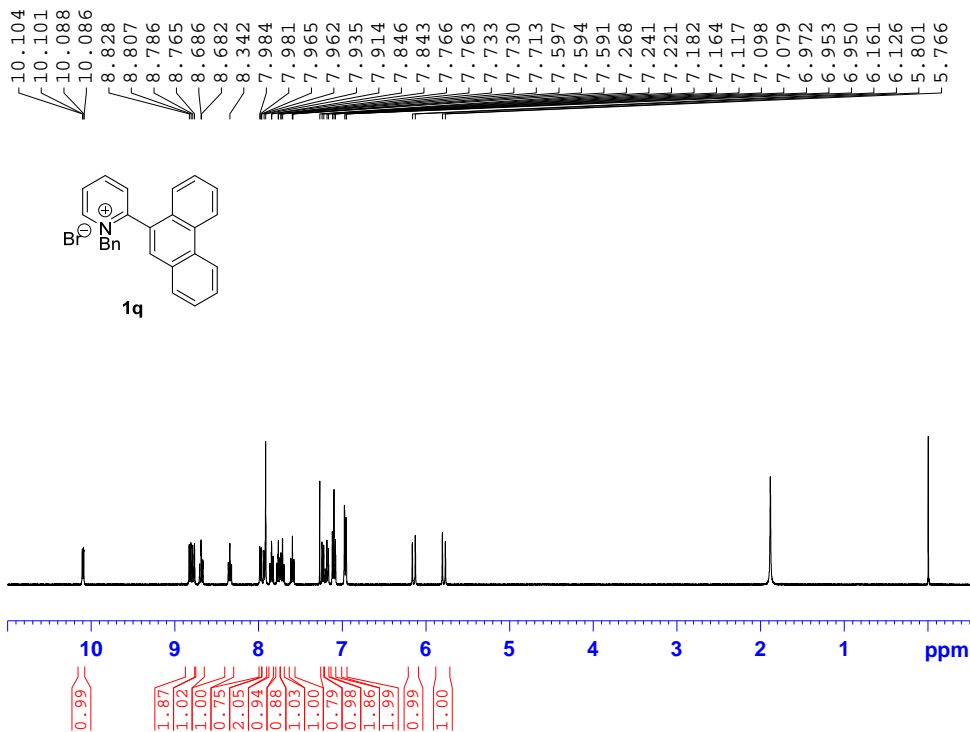

Current Data Parameters  
NAME 10967-036  
EXPNO 1  
PROCNO 1

F2 - Acquisition Parameters  
Date\_ 20170523  
Time 16.59  
INSTRUM spect  
PROBHD 5 mm PABBO BB-  
PULPROG zg10  
TD 32768  
SOLVENT CDCl3  
NS 4  
DS 4  
SWH 5896.227 Hz  
FIDRES 0.179939 Hz  
AQ 2.778723 sec  
RG 575  
DW 84.800 usec  
DE 6.50 usec  
TE 298.0 K  
D1 2.0000000 sec  
TD0 1

===== CHANNEL f1 =====  
SF01 400.1327209 MHz  
NUC1 1H  
P1 15.00 usec  
PLW1 10.50000000 W

F2 - Processing parameters  
SI 65536  
SF 400.1300067 MHz  
WDW EM  
SSB 0  
LB 0.05 Hz  
GB 0  
PC 1.00

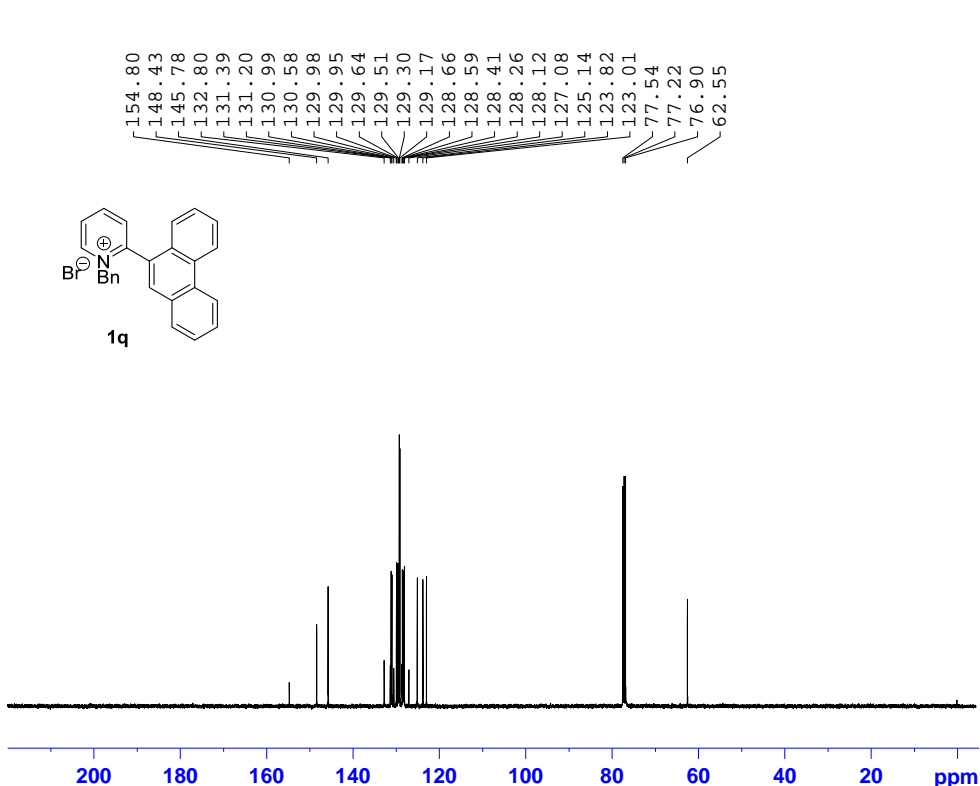

Current Data Parameters  
NAME 10967-036  
EXPNO 2  
PROCNO 1

F2 - Acquisition Parameters  
Date\_ 20170523  
Time 22.57  
INSTRUM spect  
PROBHD 5 mm PABBO BB-  
PULPROG zgpg  
TD 32768  
SOLVENT CDCl3  
NS 2500  
DS 4  
SWH 24038.461 Hz  
FIDRES 0.733596 Hz  
AQ 0.6815744 sec  
RG 2050  
DW 20.800 usec  
DE 6.50 usec  
TE 298.0 K  
D1 2.0000000 sec  
D11 0.03000000 sec  
TD0 1

===== CHANNEL f1 =====  
SF01 100.6243395 MHz  
NUC1 13C  
P1 10.90 usec  
PLW1 43.00000000 W

===== CHANNEL f2 =====  
SF02 400.1316005 MHz  
NUC2 1H  
CPDPRG[2] waltz16  
PCPD2 90.00 usec  
PLW2 10.50000000 W  
PLW12 0.29166999 W  
PLW13 0.14670999 W

F2 - Processing parameters  
SI 65536  
SF 100.6127524 MHz  
WDW EM  
SSB 0  
LB 1.00 Hz  
GB 0  
PC 1.40

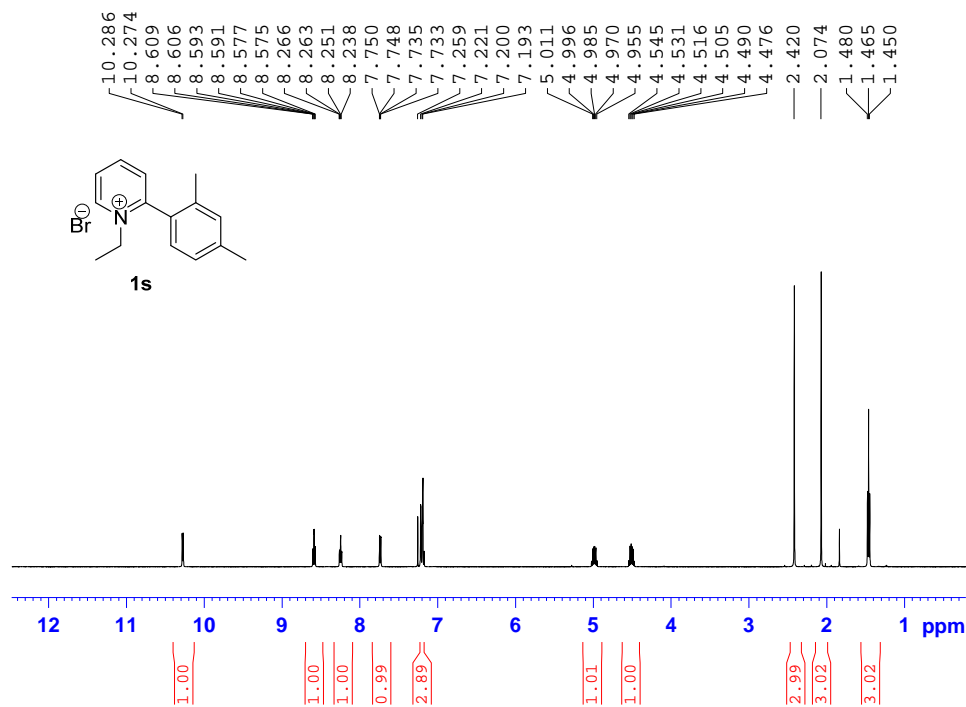

```

Current Data Parameters
NAME      10967-145
EXPNO    1
PROCNO   1

F2 - Acquisition Parameters
Date_    20170403
Time     10.38
INSTRUM  spect
PROBHD   5 mm PABBO BB-
PULPROG  zg10
TD       32768
SOLVENT  CDCl3
NS       16
DS       0
SWH      7500.000 Hz
FIDRES   0.228882 Hz
AQ       2.1845334 sec
RG       456
DW       66.667 usec
DE       6.50 usec
TE       299.0 K
D1       1.0000000 sec
TD0      1

===== CHANNEL f1 =====
SF01    500.1325007 MHz
NUC1     1H
P1       11.75 usec
PLW1    18.39999962 W

F2 - Processing parameters
SI       16384
SF       500.1300114 MHz
WDW      EM
SSB      0
LB       0.30 Hz
GB       0
PC       1.00
  
```

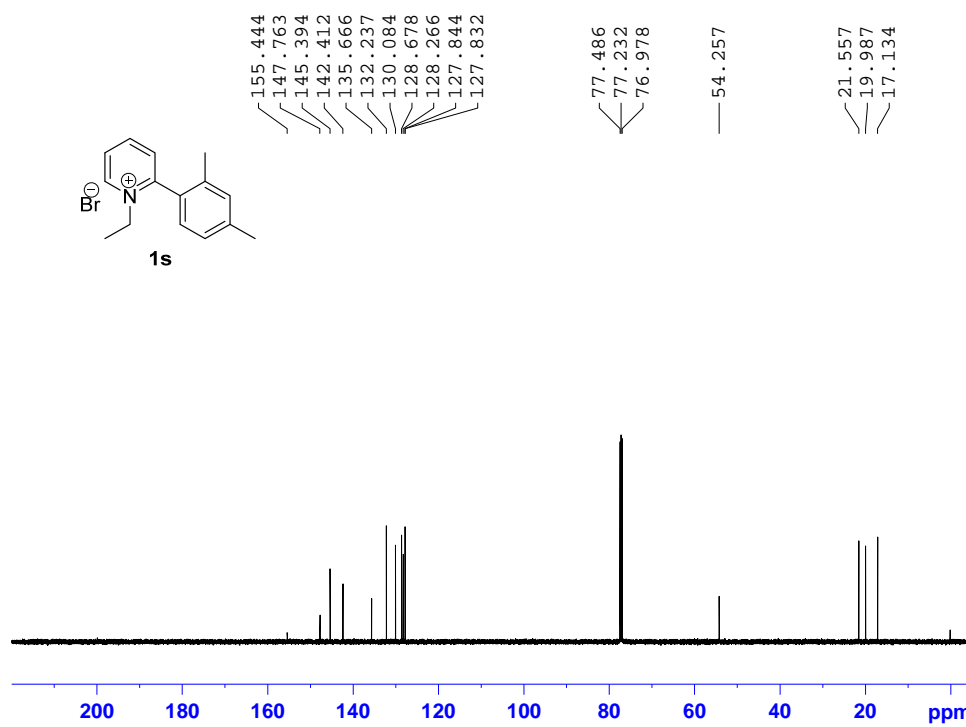

```

Current Data Parameters
NAME      10967-145
EXPNO    2
PROCNO   1

F2 - Acquisition Parameters
Date_    20170403
Time     11.03
INSTRUM  spect
PROBHD   5 mm PABBO BB-
PULPROG  zgpg
TD       262144
SOLVENT  CDCl3
NS       275
DS       0
SWH      31250.000 Hz
FIDRES   0.119209 Hz
AQ       4.1943040 sec
RG       2050
DW       16.000 usec
DE       6.50 usec
TE       299.0 K
D1       1.0000000 sec
D11      0.03000000 sec
TD0      1

===== CHANNEL f1 =====
SF01    125.7698617 MHz
NUC1     13C
P1       9.75 usec
PLW1    126.0000000 W

===== CHANNEL f2 =====
SF02    500.1325007 MHz
NUC2     1H
CPDPRG[2] waltz16
PCPD2   80.00 usec
PLW2    18.39999962 W
PLW12   0.41056001 W
PLW13   0.20651001 W

F2 - Processing parameters
SI       131072
SF       125.7577663 MHz
WDW      EM
SSB      0
LB       0.30 Hz
GB       0
PC       1.40
  
```

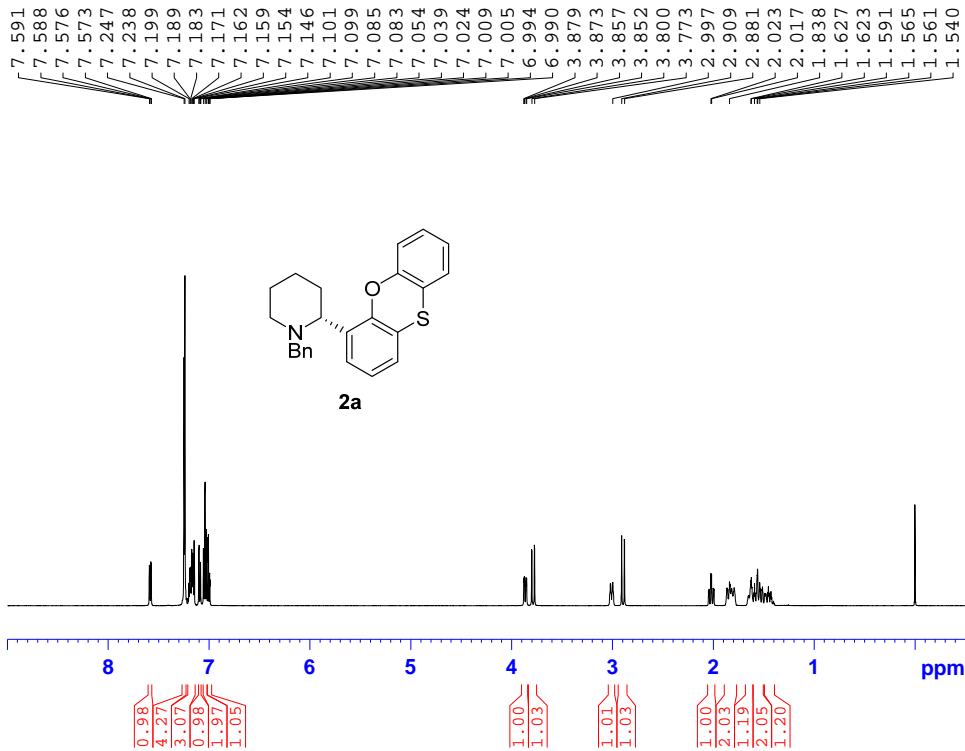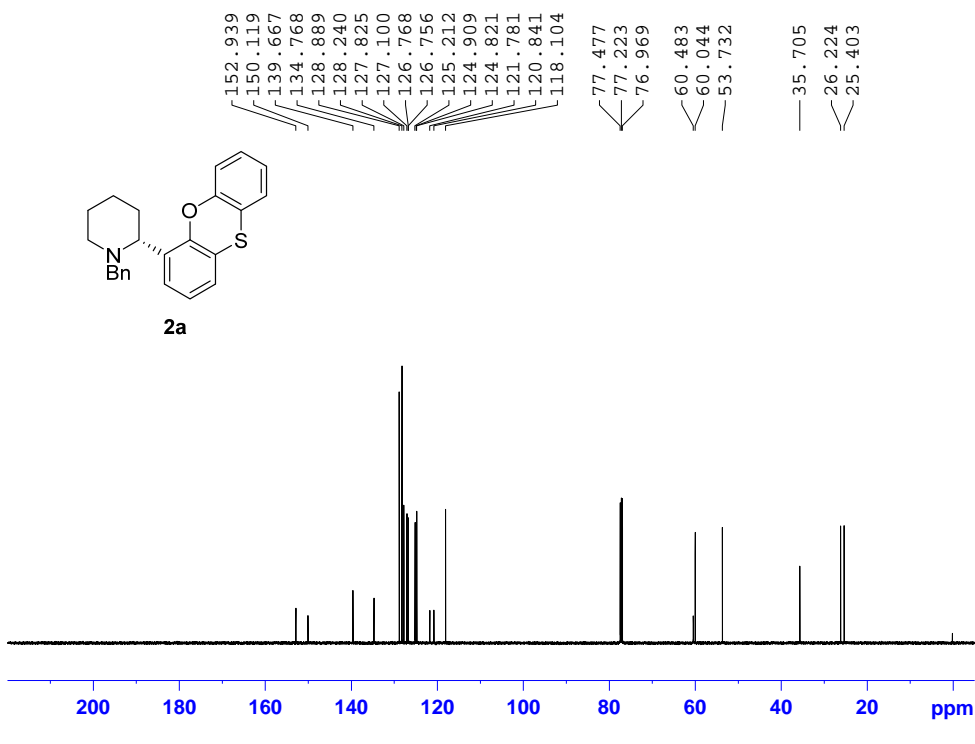

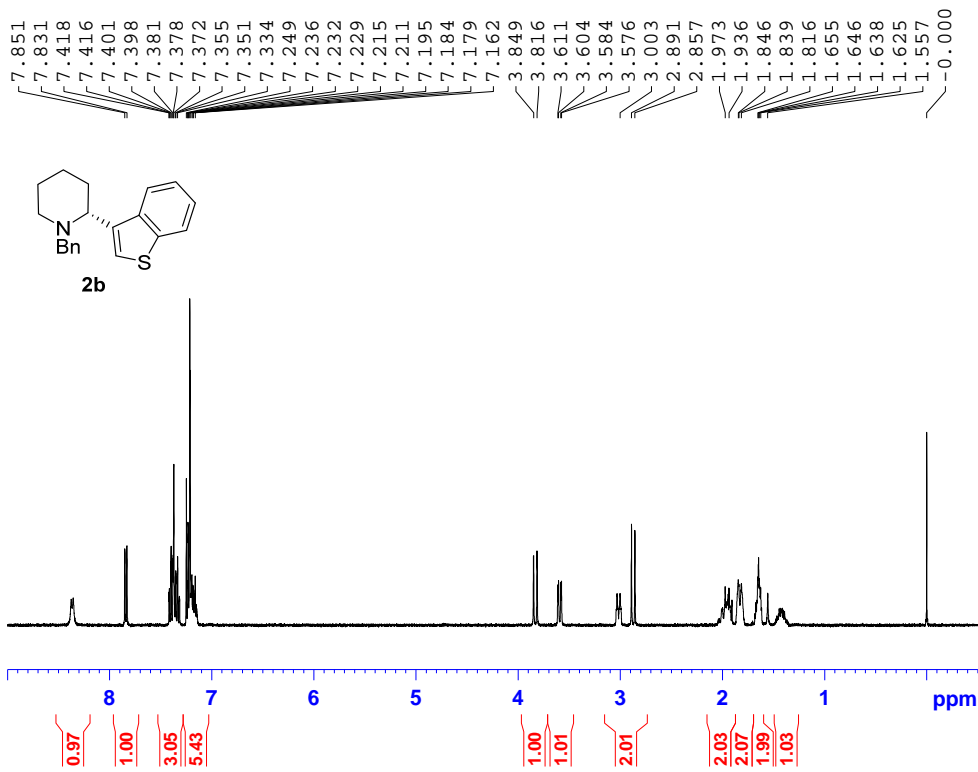

Current Data Parameters  
 NAME 10967-073  
 EXPNO 1  
 PROCNO 1

F2 - Acquisition Parameters  
 Date\_ 20170421  
 Time 17.39  
 INSTRUM spect  
 PROBHD 5 mm PABBO BB-  
 PULPROG zg30  
 TD 32768  
 SOLVENT CDCl3  
 NS 4  
 DS 4  
 SWH 5896.227 Hz  
 FIDRES 0.179939 Hz  
 AQ 2.7787263 sec  
 RG 512  
 DW 84.800 usec  
 DE 6.50 usec  
 TE 298.0 K  
 D1 2.00000000 sec  
 TD0 1

==== CHANNEL f1 =====  
 SF01 400.1327209 MHz  
 NUC1 1H  
 P1 15.00 usec  
 PLW1 10.50000000 W

F2 - Processing parameters  
 SI 65536  
 SF 400.1300145 MHz  
 WDW EM  
 SSB 0  
 LB 0.05 Hz  
 GB 0  
 PC 1.00

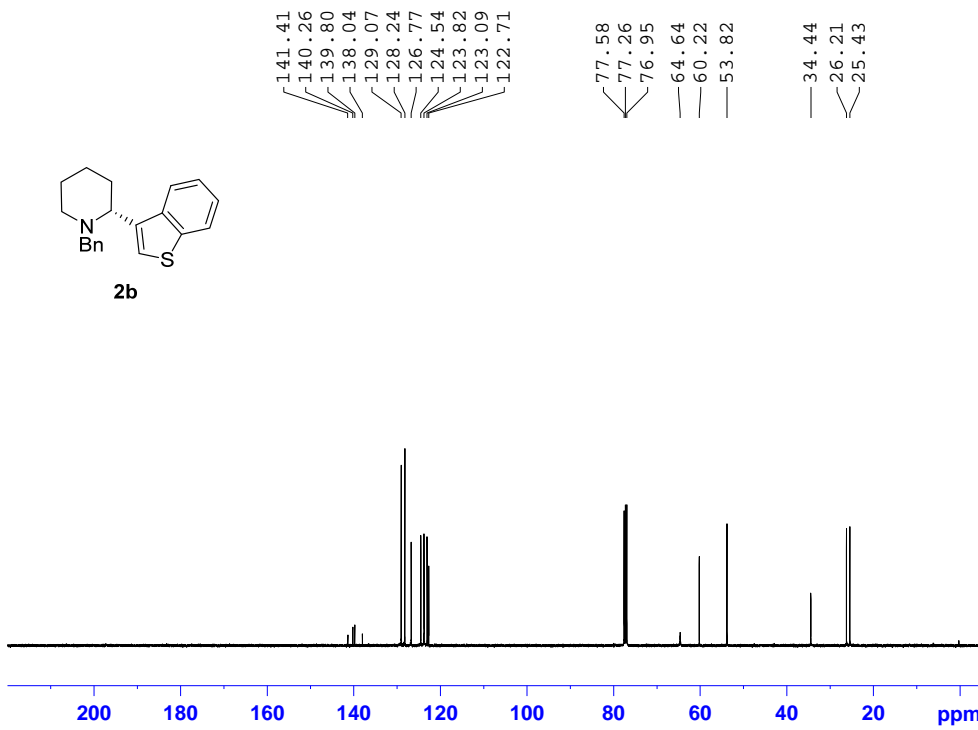

Current Data Parameters  
 NAME 10967-073  
 EXPNO 2  
 PROCNO 1

F2 - Acquisition Parameters  
 Date\_ 20170422  
 Time 6.00  
 INSTRUM spect  
 PROBHD 5 mm PABBO BB-  
 PULPROG zgpgg  
 TD 32768  
 SOLVENT CDCl3  
 NS 2500  
 DS 4  
 SWH 24038.461 Hz  
 FIDRES 0.733596 Hz  
 AQ 0.6815744 sec  
 RG 2050  
 DW 20.800 usec  
 DE 6.50 usec  
 TE 298.0 K  
 D1 2.00000000 sec  
 D11 0.03000000 sec  
 TD0 1

==== CHANNEL f1 =====  
 SF01 100.6243395 MHz  
 NUC1 13C  
 P1 10.90 usec  
 PLW1 43.00000000 W

==== CHANNEL f2 =====  
 SF02 400.1316005 MHz  
 NUC2 1H  
 CPDPRG[2] waltz16  
 PCPD2 90.00 usec  
 PLW2 10.50000000 W  
 PLW12 0.29166999 W  
 PLW13 0.14670999 W

F2 - Processing parameters  
 SI 65536  
 SF 100.6127450 MHz  
 WDW EM  
 SSB 0  
 LB 1.00 Hz  
 GB 0  
 PC 1.40

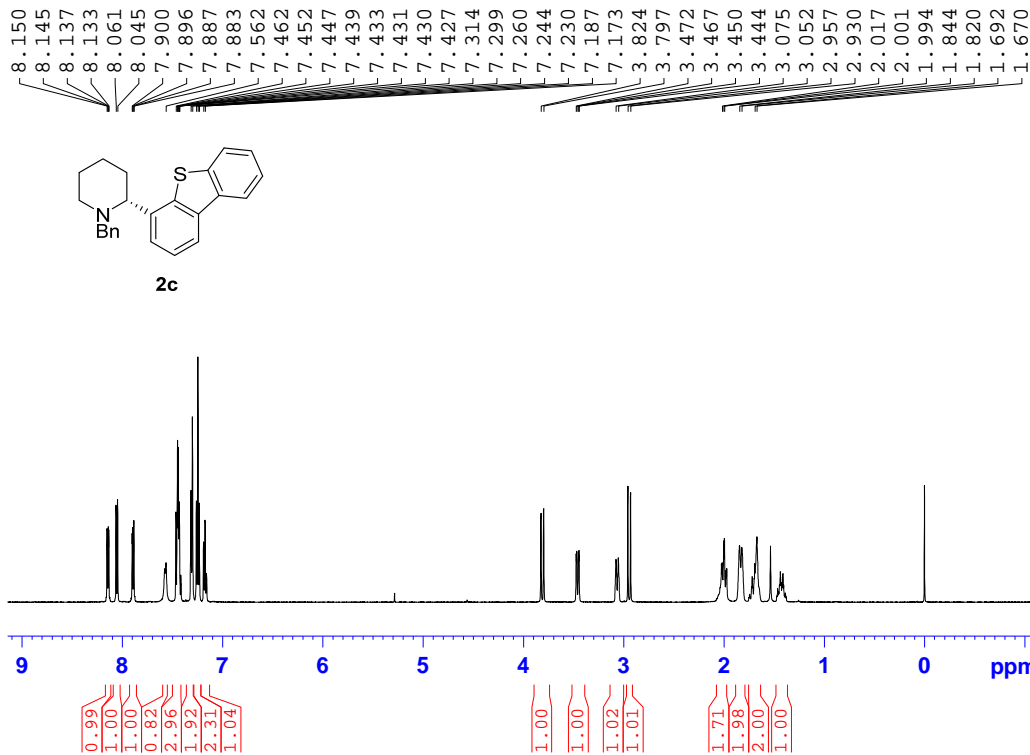

Current Data Parameters  
 NAME 10967-117  
 EXPNO 1  
 PROCNO 1

F2 - Acquisition Parameters  
 Date\_ 20170331  
 Time 16.25  
 INSTRUM spect  
 PROBHD 5 mm PABBO BB-  
 PULPROG zg10  
 TD 32768  
 SOLVENT CDC13  
 NS 16  
 DS 0  
 SWH 7500.000 Hz  
 FIDRES 0.228882 Hz  
 AQ 2.1845334 sec  
 RG 362  
 DW 66.667 usec  
 DE 6.50 usec  
 TE 299.0 K  
 D1 1.00000000 sec  
 TD0 1

==== CHANNEL f1 =====  
 SFO1 500.1325007 MHz  
 NUC1 1H  
 P1 11.75 usec  
 PLW1 18.39999962 W

F2 - Processing parameters  
 SI 16384  
 SF 500.1300190 MHz  
 WDW EM  
 SSB 0  
 LB 0.30 Hz  
 GB 0  
 PC 1.00

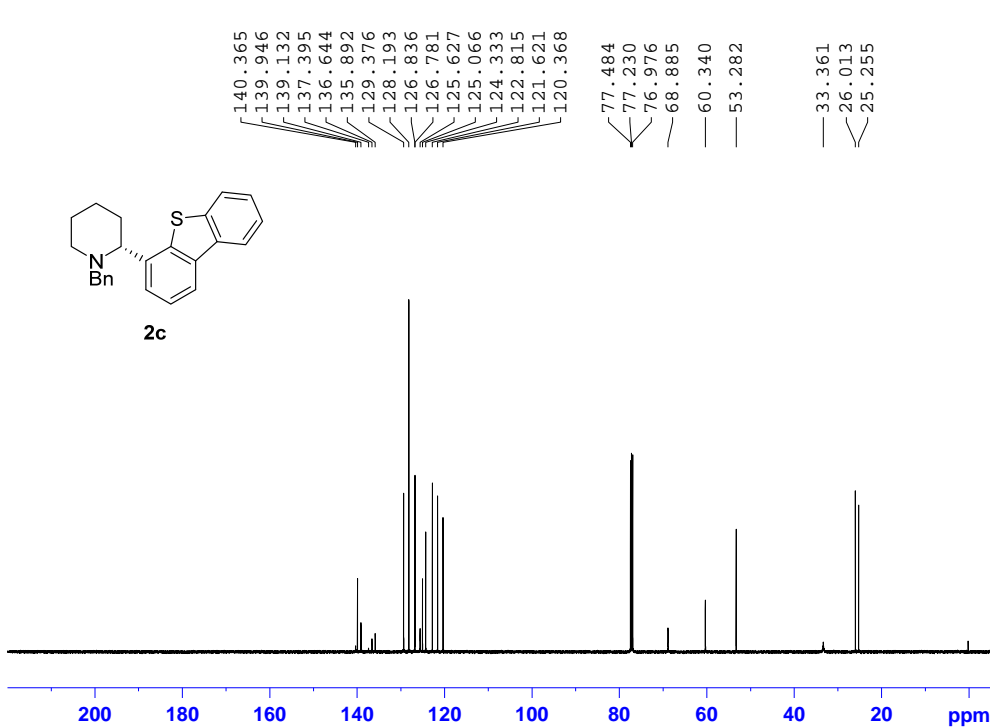

Current Data Parameters  
 NAME 10967-117  
 EXPNO 2  
 PROCNO 1

F2 - Acquisition Parameters  
 Date\_ 20170401  
 Time 1.32  
 INSTRUM spect  
 PROBHD 5 mm PABBO BB-  
 PULPROG zgpg  
 TD 262144  
 SOLVENT CDC13  
 NS 2000  
 DS 0  
 SWH 31250.000 Hz  
 FIDRES 0.119209 Hz  
 AQ 4.1943040 sec  
 RG 2050  
 DW 16.000 usec  
 DE 6.50 usec  
 TE 299.0 K  
 D1 1.00000000 sec  
 D11 0.03000000 sec  
 TD0 1

==== CHANNEL f1 =====  
 SFO1 125.7698617 MHz  
 NUC1 13C  
 P1 9.75 usec  
 PLW1 126.00000000 W

==== CHANNEL f2 =====  
 SFO2 500.1325007 MHz  
 NUC2 1H  
 CPDPRG2 waltz16  
 PCPD2 80.00 usec  
 PLW2 18.39999962 W  
 PLW12 0.41056001 W  
 PLW13 0.20651001 W

F2 - Processing parameters  
 SI 131072  
 SF 125.7577634 MHz  
 WDW EM  
 SSB 0  
 LB 0.30 Hz  
 GB 0  
 PC 1.40



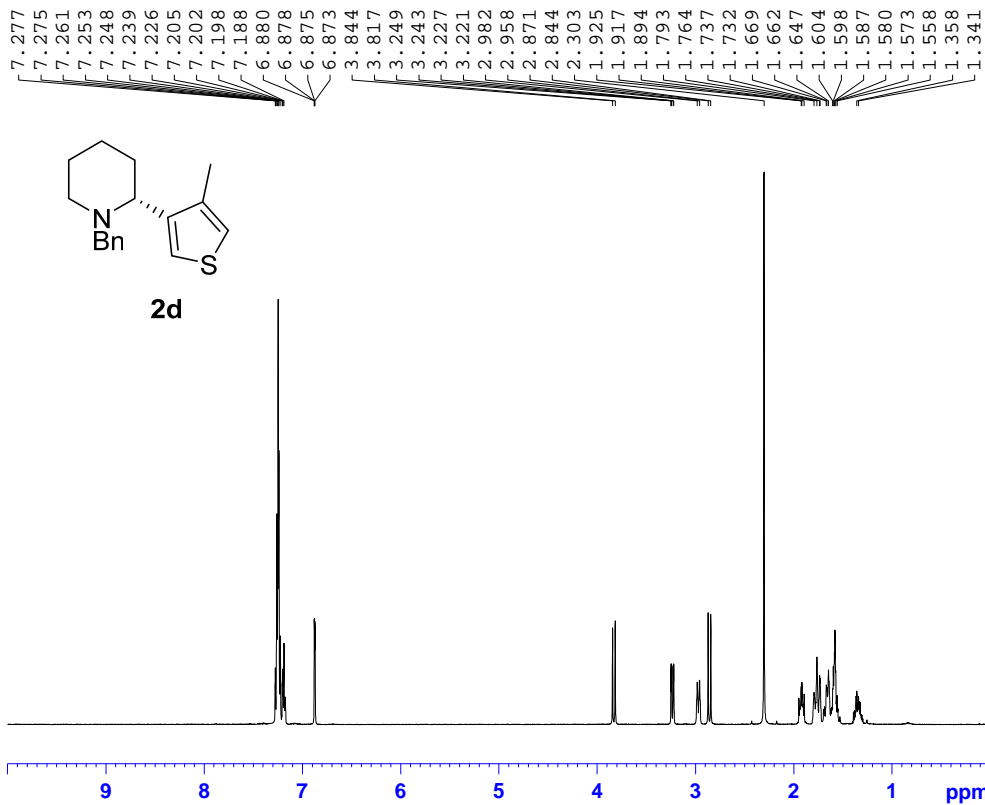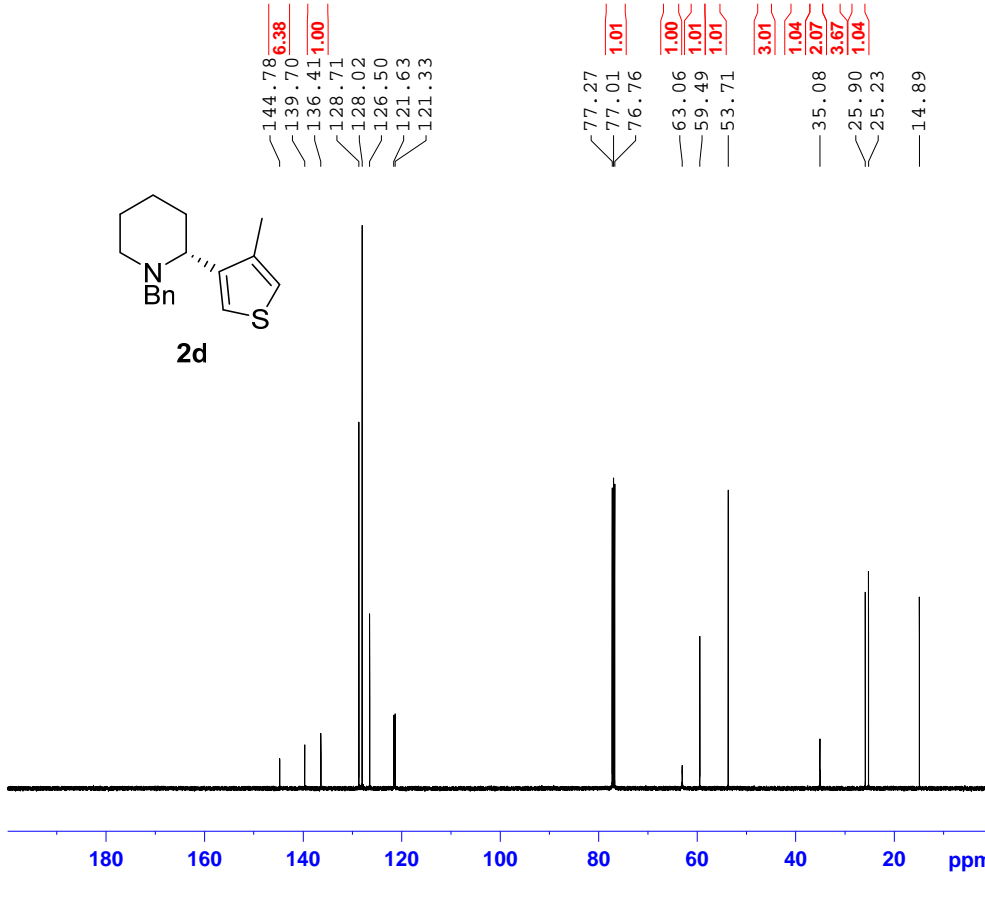

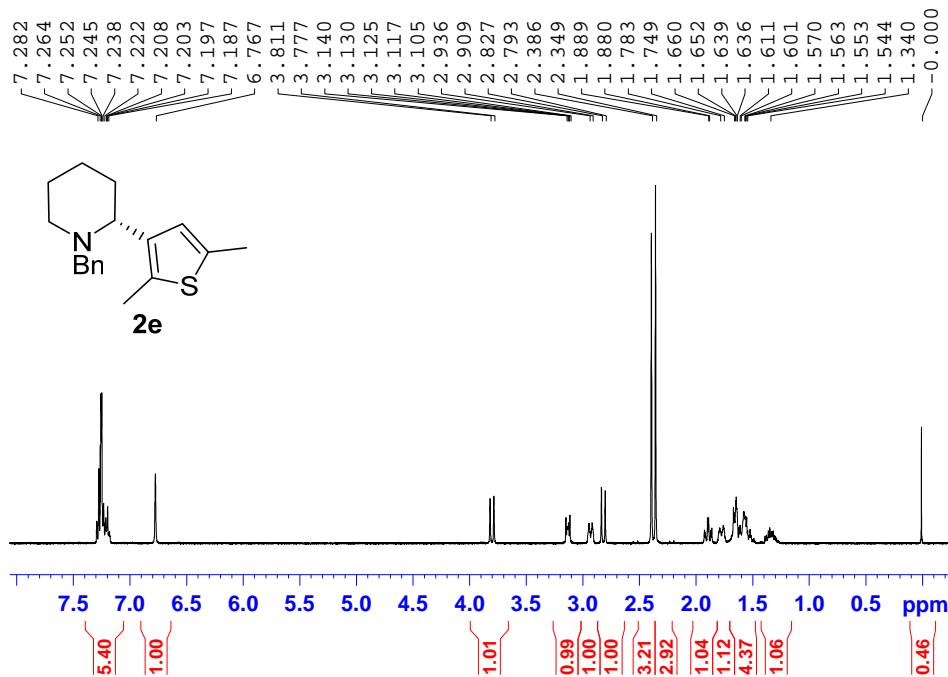

Current Data Parameters  
 NAME 10967-097  
 EXPNO 1  
 PROCNO 1

F2 - Acquisition Parameters  
 Date\_ 20170421  
 Time 17.43  
 INSTRUM spect  
 PROBHD 5 mm PABBO BB-  
 PULPROG zg10  
 TD 32768  
 SOLVENT CDCl3  
 NS 4  
 DS 4  
 SWH 5896.227 Hz  
 FIDRES 0.179939 Hz  
 AQ 2.7787263 sec  
 RG 456  
 DW 84.800 usec  
 DE 6.50 usec  
 TE 298.0 K  
 D1 2.0000000 sec  
 TD0 1

==== CHANNEL f1 =====  
 SFO1 400.1327209 MHz  
 NUC1 1H  
 P1 15.00 usec  
 PLW1 10.5000000 W

F2 - Processing parameters  
 SI 65536  
 SF 400.1300103 MHz  
 WDW EM  
 SSB 0  
 LB 0.05 Hz  
 GB 0  
 PC 1.00

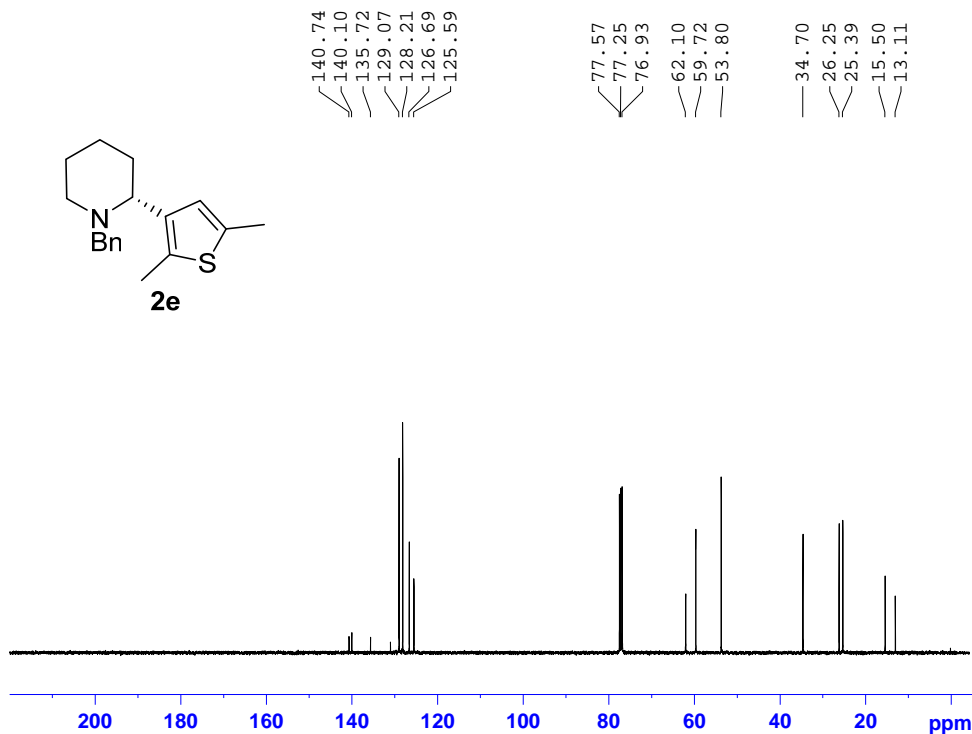

Current Data Parameters  
 NAME 10967-097  
 EXPNO 2  
 PROCNO 1

F2 - Acquisition Parameters  
 Date\_ 20170422  
 Time 20.59  
 INSTRUM spect  
 PROBHD 5 mm PABBO BB-  
 PULPROG zgpg  
 TD 32768  
 SOLVENT CDCl3  
 NS 2500  
 DS 4  
 SWH 24038.461 Hz  
 FIDRES 0.733596 Hz  
 AQ 0.6815744 sec  
 RG 2050  
 DW 20.800 usec  
 DE 6.50 usec  
 TE 298.0 K  
 D1 2.0000000 sec  
 D11 0.0300000 sec  
 TD0 1

==== CHANNEL f1 =====  
 SFO1 100.6243395 MHz  
 NUC1 13C  
 P1 10.90 usec  
 PLW1 43.0000000 W

==== CHANNEL f2 =====  
 SFO2 400.1316005 MHz  
 NUC2 1H  
 CPDPRG[2] waltz16  
 PCPD2 90.00 usec  
 PLW2 10.5000000 W  
 PLW12 0.29166999 W  
 PLW13 0.14670999 W

F2 - Processing parameters  
 SI 65536  
 SF 100.6127464 MHz  
 WDW EM  
 SSB 0  
 LB 1.00 Hz  
 GB 0  
 PC 1.40

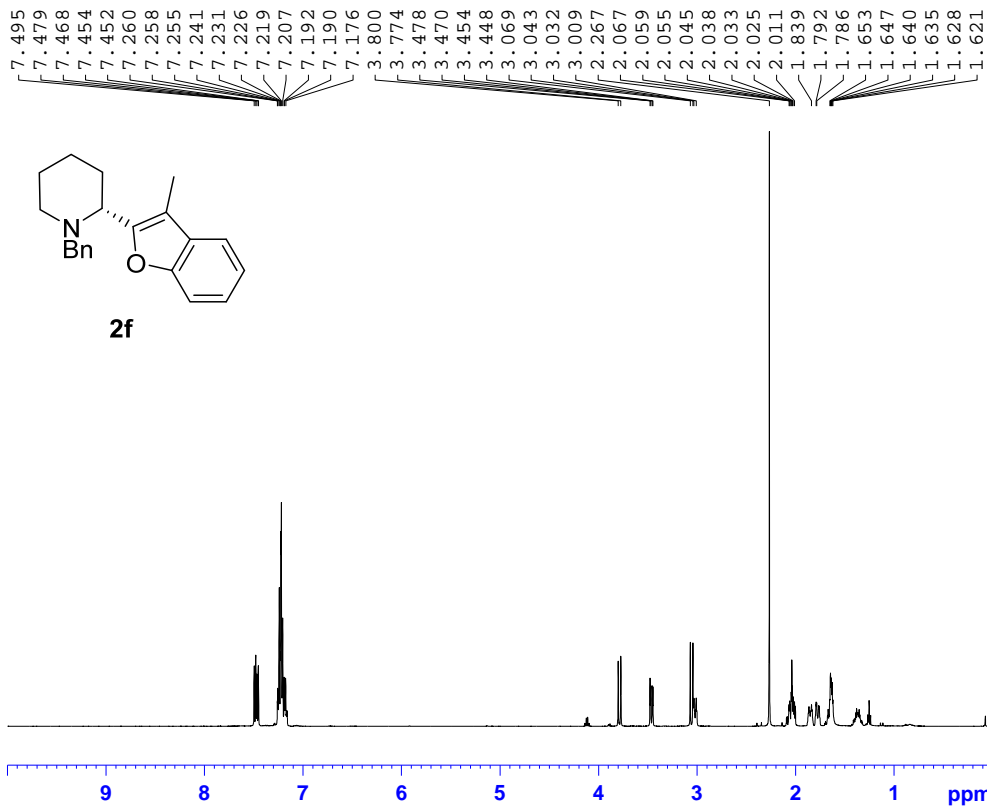

Current Data Parameters  
 NAME bqul-00183b  
 EXPNO 1  
 PROCNO 1

F2 - Acquisition Parameters  
 Date\_ 20171222  
 Time 17.05  
 INSTRUM spect  
 PROBHD 5 mm PABBO BB/  
 PULPROG zg10  
 TD 32768  
 SOLVENT CDC13  
 NS 16  
 DS 0  
 SWH 7500.000 Hz  
 FIDRES 0.228882 Hz  
 AQ 2.1845334 sec  
 RG 322  
 DW 66.667 usec  
 DE 6.50 usec  
 TE 299.0 K  
 D1 1.00000000 sec  
 TD0 1

===== CHANNEL f1 =====  
 SFO1 500.1325007 MHz  
 NUC1 1H  
 P1 14.00 usec  
 PLW1 16.00000000 W

F2 - Processing parameters  
 SI 16384  
 SF 500.1300214 MHz  
 WDW EM  
 SSB 0  
 LB 0.30 Hz  
 GB 0  
 PC 1.00

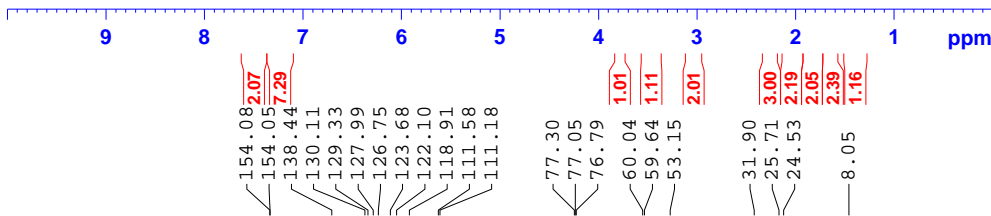

Current Data Parameters  
 NAME bqul-00183b  
 EXPNO 2  
 PROCNO 1

F2 - Acquisition Parameters  
 Date\_ 20171222  
 Time 19.48  
 INSTRUM spect  
 PROBHD 5 mm PABBO BB/  
 PULPROG zgpg  
 TD 262144  
 SOLVENT CDC13  
 NS 512  
 DS 0  
 SWH 31250.000 Hz  
 FIDRES 0.119209 Hz  
 AQ 4.1943040 sec  
 RG 2050  
 DW 16.000 usec  
 DE 6.50 usec  
 TE 299.0 K  
 D1 1.00000000 sec  
 D11 0.03000000 sec  
 TD0 1

===== CHANNEL f1 =====  
 SFO1 125.7698617 MHz  
 NUC1 13C  
 P1 10.00 usec  
 PLW1 99.50000000 W

===== CHANNEL f2 =====  
 SFO2 500.1325007 MHz  
 NUC2 1H  
 CPDPRG[2] waltz16  
 PCPD2 80.00 usec  
 PLW2 16.00000000 W  
 PLW12 0.49000001 W  
 PLW13 0.24647000 W

F2 - Processing parameters  
 SI 131072  
 SF 125.7577890 MHz  
 WDW EM  
 SSB 0  
 LB 0.30 Hz  
 GB 0  
 PC 1.40

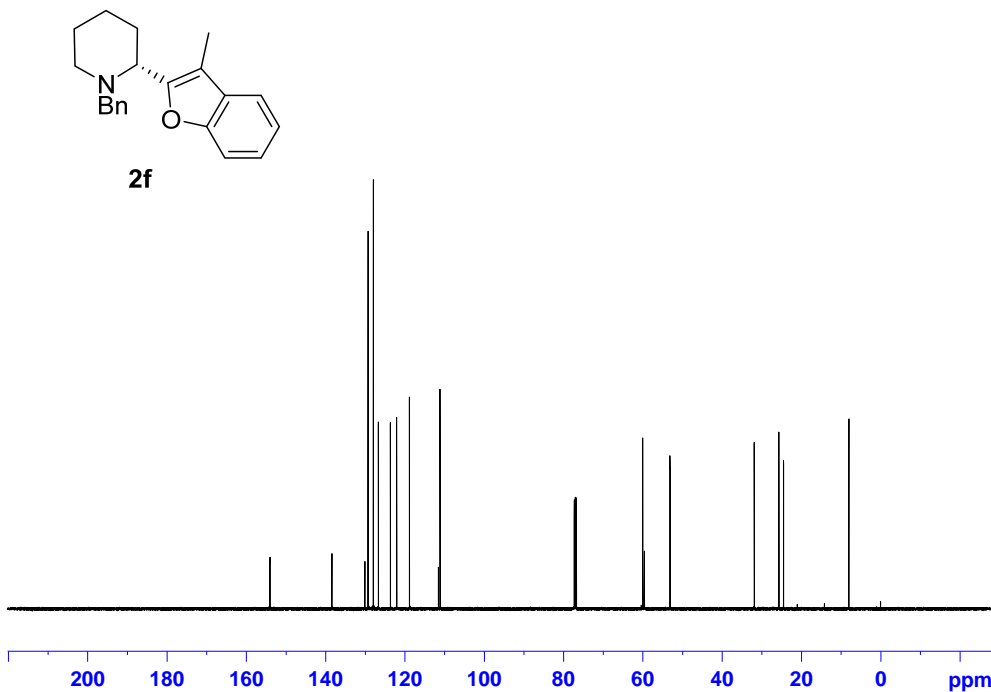

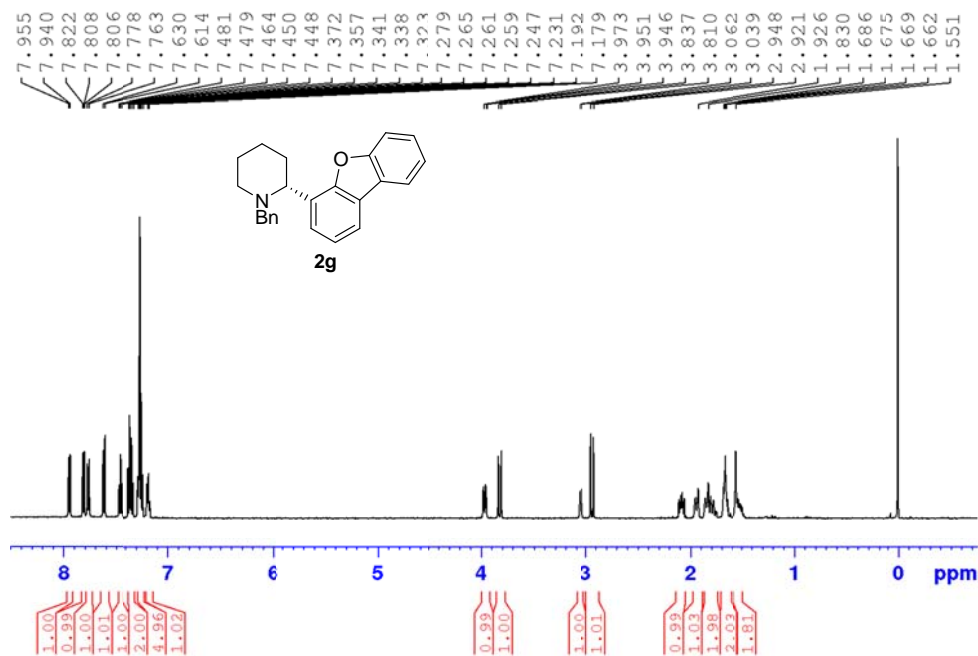

Current Data Parameters  
 NAME 10967-135  
 EXPNO 1  
 PROCNO 1

F2 - Acquisition Parameters  
 Date\_ 20170412  
 Time 17.12  
 INSTRUM spect  
 PROBHD 5 mm PABBO B3-  
 PULPROG zg10  
 TD 32768  
 SOLVENT CDCl3  
 NS 16  
 DS 0  
 SWH 7500.000 Hz  
 FIDRES 0.228882 Hz  
 AQ 2.1845334 sec  
 RG 5.2  
 DW 66.667 usec  
 DE 6.30 usec  
 TE 299.0 K  
 D1 1.00000000 sec  
 TDO 1

==== CHANNEL f1 =====  
 SFO1 500.1325007 MHz  
 NUC1 1H  
 P1 11.75 usec  
 PLW1 18.39999952 W

F2 - Processing parameters  
 SI 16384  
 SF 500.1300115 MHz  
 WDW EM  
 SSB 0  
 LB 0.30 Hz  
 GB 0  
 PC 1.00

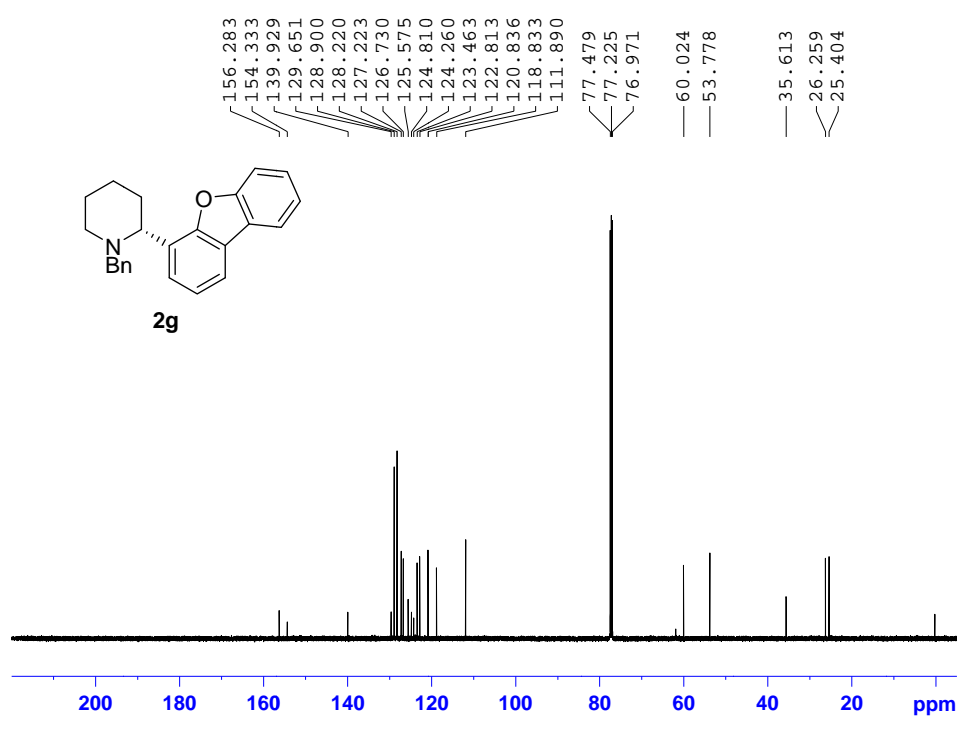

Current Data Parameters  
 NAME 10967-135  
 EXPNO 2  
 PROCNO 1

F2 - Acquisition Parameters  
 Date\_ 20170413  
 Time 4.34  
 INSTRUM spect  
 PROBHD 5 mm PABBO BB-  
 PULPROG zgpg  
 TD 262144  
 SOLVENT CDCl3  
 NS 1500  
 DS 0  
 SWH 31250.000 Hz  
 FIDRES 0.119209 Hz  
 AQ 4.1943040 sec  
 RG 2050  
 DW 16.000 usec  
 DE 6.50 usec  
 TE 299.0 K  
 D1 1.00000000 sec  
 D11 0.03000000 sec  
 TDO 1

==== CHANNEL f1 =====  
 SFO1 125.7698617 MHz  
 NUC1 13C  
 P1 9.75 usec  
 PLW1 126.00000000 W

==== CHANNEL f2 =====  
 SFO2 500.1325007 MHz  
 NUC2 1H  
 CPDPRG2 waltz16  
 PCPD2 80.00 usec  
 PLW2 18.39999962 W  
 PLW12 0.41056001 W  
 PLW13 0.20651001 W

F2 - Processing parameters  
 SI 131072  
 SF 125.7577622 MHz  
 WDW EM  
 SSB 0  
 LB 0.30 Hz  
 GB 0  
 PC 1.40

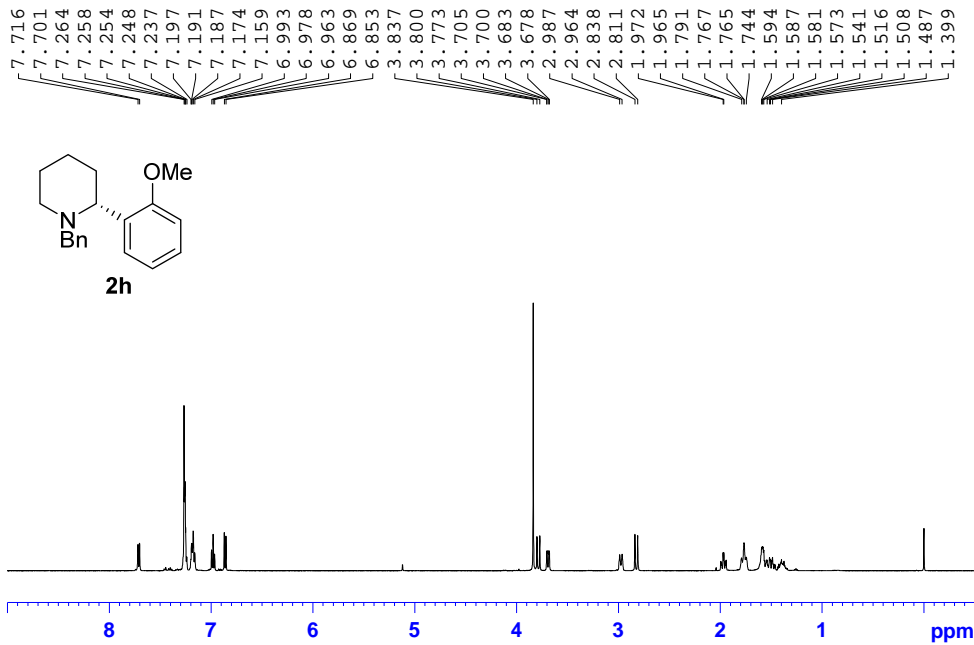

```

Current Data Parameters
NAME      10967-185
EXPNO    1
PROCNO   1

F2 - Acquisition Parameters
Date_    20170509
Time     16.25
INSTRUM  spect
PROBHD   5 mm PABBO BB-
PULPROG  zg10
TD       32768
SOLVENT  CDCl3
NS       16
DS       0
SWH      7500.000 Hz
FIDRES   0.228882 Hz
AQ       2.1845334 sec
RG       322
DW       66.667 usec
DE       6.50 usec
TE       299.0 K
D1       1.00000000 sec
TD0      1

===== CHANNEL f1 =====
SF01    500.1325007 MHz
NUC1     1H
P1       11.75 usec
PLW1    18.39999962 W

F2 - Processing parameters
SI       16384
SF       500.1300174 MHz
WDW      EM
SSB      0
LB       0.30 Hz
GB       0
PC       1.00
  
```

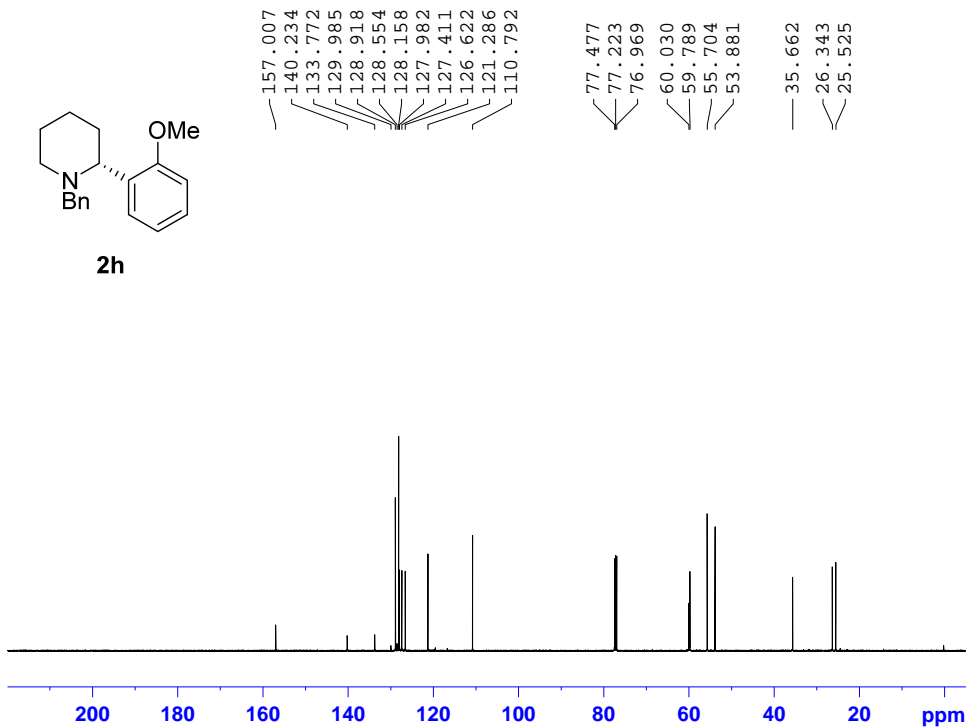

```

Current Data Parameters
NAME      10967-185
EXPNO    2
PROCNO   1

F2 - Acquisition Parameters
Date_    20170429
Time     1.20
INSTRUM  spect
PROBHD   5 mm PABBO BB-
PULPROG  zpgg
TD       262144
SOLVENT  CDCl3
NS       2500
DS       0
SWH      31250.000 Hz
FIDRES   0.119209 Hz
AQ       4.1943040 sec
RG       2050
DW       16.000 usec
DE       6.50 usec
TE       299.0 K
D1       1.00000000 sec
D11      0.03000000 sec
TD0      1

===== CHANNEL f1 =====
SF01    125.7698617 MHz
NUC1     13C
P1       9.75 usec
PLW1    126.00000000 W

===== CHANNEL f2 =====
SF02    500.1325007 MHz
NUC2     1H
CPDPRG2  waltz16
PCPD2    80.00 usec
PLW2    18.39999962 W
PLW12   0.41056001 W
PLW13   0.20651001 W

F2 - Processing parameters
SI       131072
SF       125.7577645 MHz
WDW      EM
SSB      0
LB       0.30 Hz
GB       0
PC       1.40
  
```

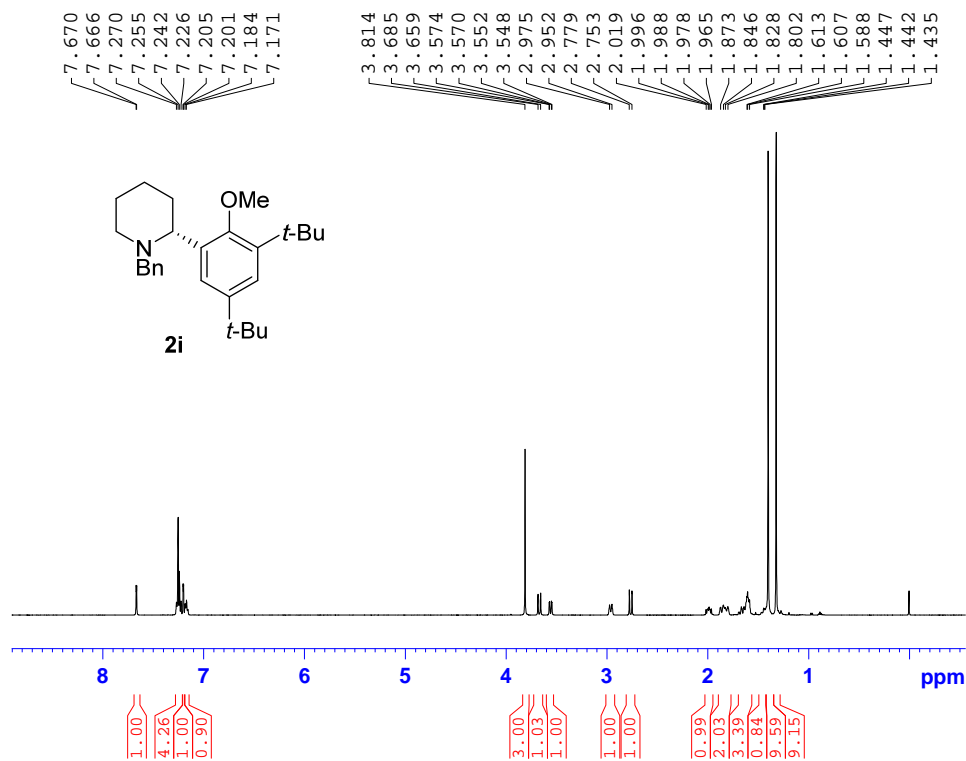

Current Data Parameters  
 NAME 10967-042  
 EXPNO 1  
 PROCNO 1

F2 - Acquisition Parameters  
 Date\_ 20170106  
 Time 18.11  
 INSTRUM spect  
 PROBHD 5 mm PABBO BB/  
 PULPROG zg10  
 TD 32768  
 SOLVENT CDCl3  
 NS 16  
 DS 0  
 SWH 7500.000 Hz  
 FIDRES 0.228882 Hz  
 AQ 2.1845334 sec  
 RG 322  
 DW 66.667 usec  
 DE 6.50 usec  
 TE 299.0 K  
 D1 1.00000000 sec  
 TD0 1

==== CHANNEL f1 =====  
 SFO1 500.1325007 MHz  
 NUC1 1H  
 P1 14.00 usec  
 PLW1 18.79999924 W

F2 - Processing parameters  
 SI 16384  
 SF 500.1300152 MHz  
 WDW EM  
 SSB 0  
 LB 0.30 Hz  
 GB 0  
 PC 1.00

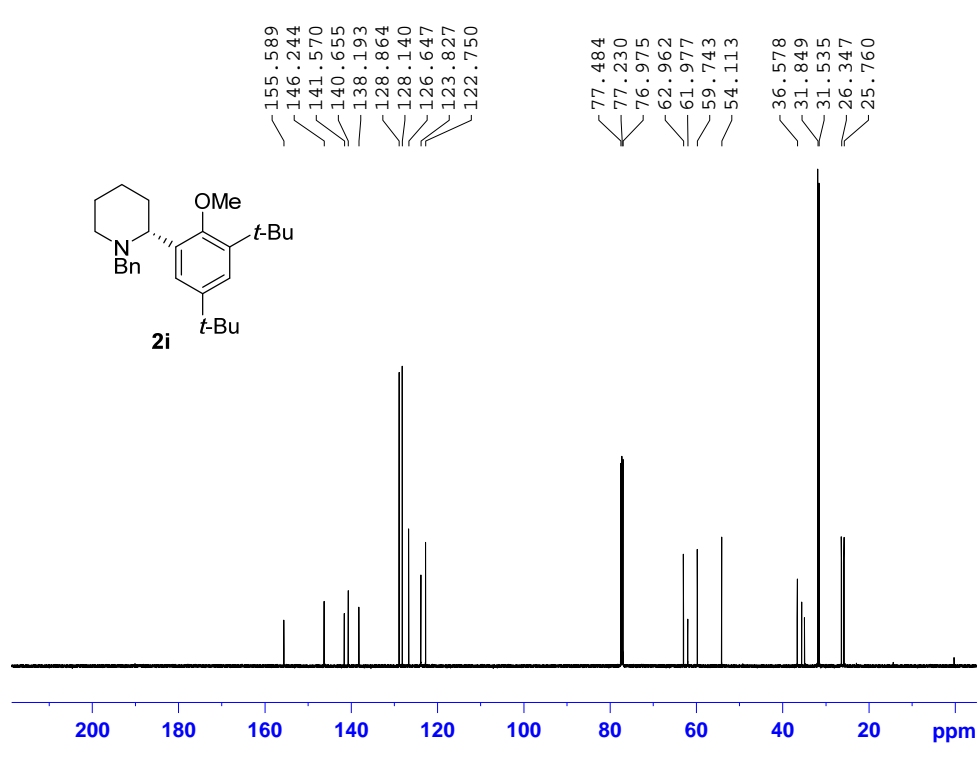

Current Data Parameters  
 NAME 10967-042  
 EXPNO 2  
 PROCNO 1

F2 - Acquisition Parameters  
 Date\_ 20170107  
 Time 1.30  
 INSTRUM spect  
 PROBHD 5 mm PABBO BB/  
 PULPROG zgpg  
 TD 262144  
 SOLVENT CDCl3  
 NS 1250  
 DS 0  
 SWH 31250.000 Hz  
 FIDRES 0.119209 Hz  
 AQ 4.1943040 sec  
 RG 2050  
 DW 16.000 usec  
 DE 6.50 usec  
 TE 299.0 K  
 D1 1.00000000 sec  
 D11 0.03000000 sec  
 TD0 1

==== CHANNEL f1 =====  
 SFO1 125.7698617 MHz  
 NUC1 13C  
 P1 10.00 usec  
 PLW1 99.50000000 W

==== CHANNEL f2 =====  
 SFO2 500.1325007 MHz  
 NUC2 1H  
 CPDPRG[2] waltz16  
 PCPD2 80.00 usec  
 PLW2 18.79999924 W  
 PLW12 0.57574999 W  
 PLW13 0.28960001 W

F2 - Processing parameters  
 SI 131072  
 SF 125.7577627 MHz  
 WDW EM  
 SSB 0  
 LB 0.30 Hz  
 GB 0  
 PC 1.40

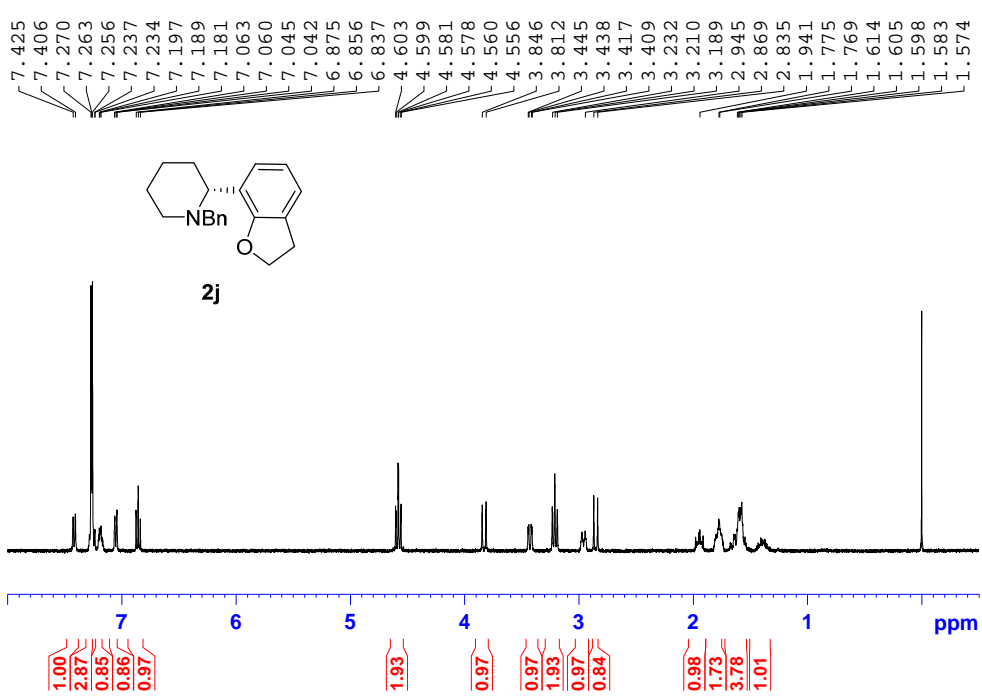

Current Data Parameters  
 NAME 10967-120  
 EXPNO 1  
 PROCNO 1

F2 - Acquisition Parameters  
 Date\_ 20170421  
 Time 17.21  
 INSTRUM spect  
 PROBHD 5 mm PABBO BB-  
 PULPROG zg10  
 TD 32768  
 SOLVENT CDCl3  
 NS 4  
 DS 4  
 SWH 5896.227 Hz  
 FIDRES 0.179939 Hz  
 AQ 2.7787263 sec  
 RG 645  
 DW 84.800 usec  
 DE 6.50 usec  
 TE 298.0 K  
 D1 2.00000000 sec  
 TD0 1

==== CHANNEL f1 =====  
 SFO1 400.1327209 MHz  
 NUC1 1H  
 P1 15.00 usec  
 PLW1 10.50000000 W

F2 - Processing parameters  
 SI 65536  
 SF 400.1300116 MHz  
 WDW EM  
 SSB 0  
 LB 0.05 Hz  
 GB 0  
 PC 1.00

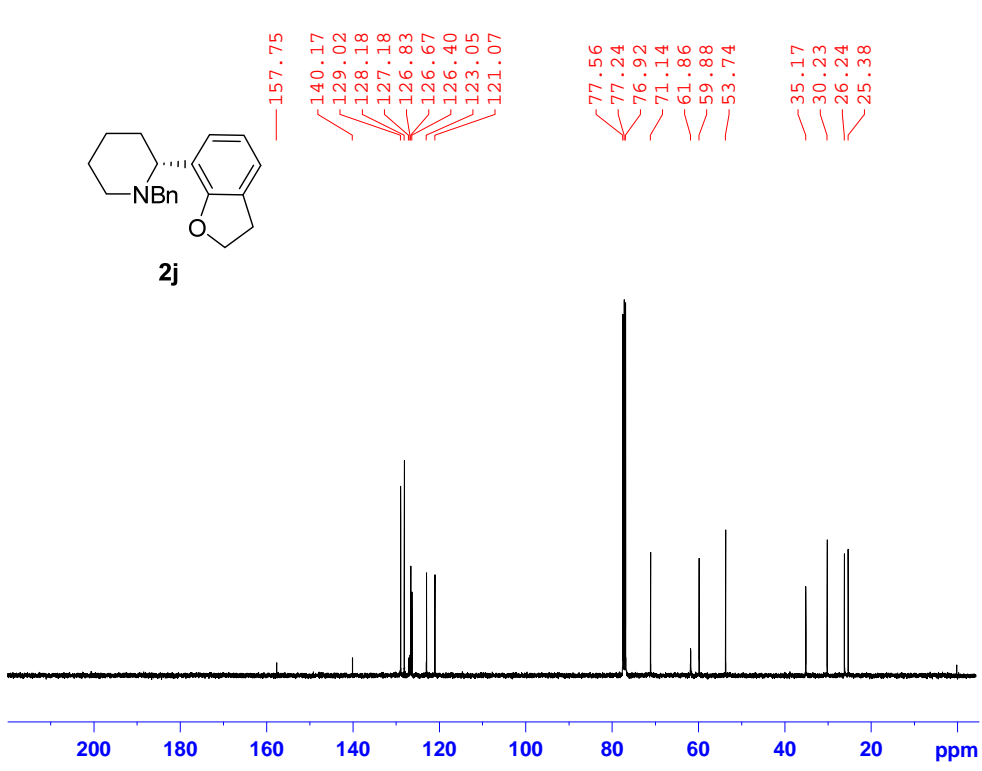

Current Data Parameters  
 NAME 10967-120  
 EXPNO 2  
 PROCNO 1

F2 - Acquisition Parameters  
 Date\_ 20170421  
 Time 22.07  
 INSTRUM spect  
 PROBHD 5 mm PABBO BB-  
 PULPROG zgpg  
 TD 32768  
 SOLVENT CDCl3  
 NS 4000  
 DS 4  
 SWH 24038.461 Hz  
 FIDRES 0.733596 Hz  
 AQ 0.6815744 sec  
 RG 2050  
 DW 20.800 usec  
 DE 6.50 usec  
 TE 298.0 K  
 D1 2.00000000 sec  
 D11 0.03000000 sec  
 TD0 1

==== CHANNEL f1 =====  
 SFO1 100.6243395 MHz  
 NUC1 13C  
 P1 10.90 usec  
 PLW1 43.00000000 W

==== CHANNEL f2 =====  
 SFO2 400.1316005 MHz  
 NUC2 1H  
 CPDPRG2 waltz16  
 PCPD2 90.00 usec  
 PLW2 10.50000000 W  
 PLW12 0.29166999 W  
 PLW13 0.14670999 W

F2 - Processing parameters  
 SI 65536  
 SF 100.6127468 MHz  
 WDW EM  
 SSB 0  
 LB 1.00 Hz  
 GB 0  
 PC 1.40

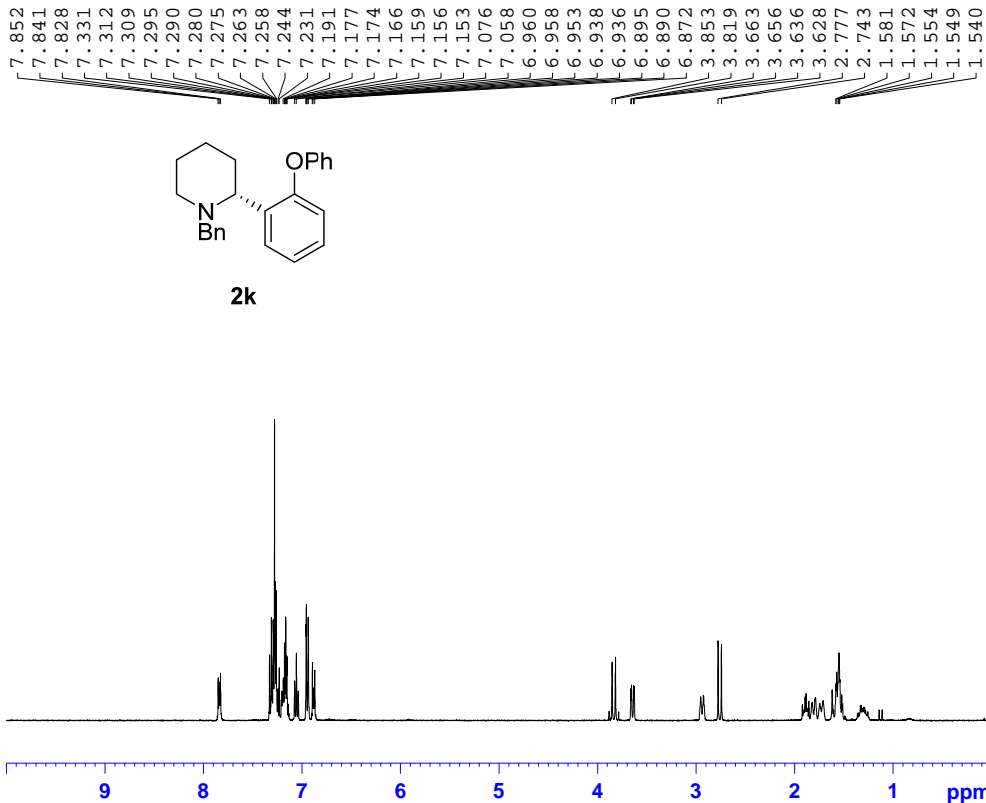

```
Current Data Parameters
NAME      10967-056-p
EXPNO    1
PROCNO   1

F2 - Acquisition Parameters
Date_    20180205
Time     18.37
INSTRUM spect
PROBHD   5 mm PABBO BB-
PULPROG zg10
TD       32768
SOLVENT  CDC13
NS       4
DS       4
SWH      5896.227 Hz
FIDRES   0.179939 Hz
AQ       2.7787263 sec
RG       203
DW       84.800 usec
DE       6.50 usec
TE       298.0 K
D1       2.00000000 sec
TD0      1

===== CHANNEL f1 =====
SFO1    400.1327209 MHz
NUC1     1H
P1       15.00 usec
PLW1    10.50000000 W

F2 - Processing parameters
SI       65536
SF       400.1300211 MHz
WDW      EM
SSB      0
LB       0.05 Hz
GB       0
PC       1.00
```

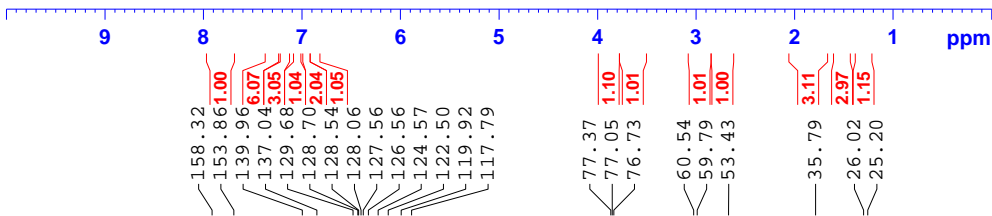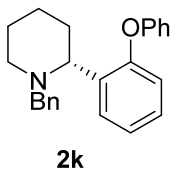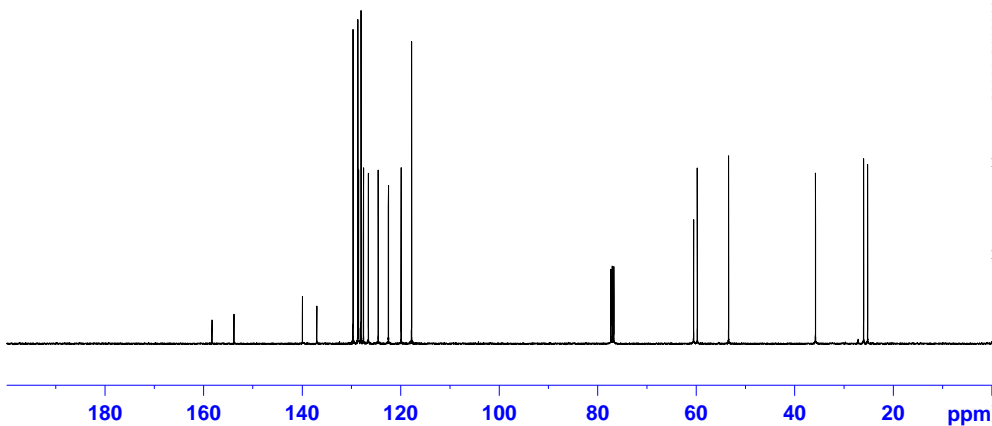

```
Current Data Parameters
NAME      10967-056-p
EXPNO    2
PROCNO   1

F2 - Acquisition Parameters
Date_    20180205
Time     20.39
INSTRUM spect
PROBHD   5 mm PABBO BB-
PULPROG zgpg
TD       32768
SOLVENT  CDC13
NS       2560
DS       4
SWH      24038.461 Hz
FIDRES   0.733596 Hz
AQ       0.6815744 sec
RG       2050
DW       20.800 usec
DE       6.50 usec
TE       298.0 K
D1       2.00000000 sec
D11      0.03000000 sec
TD0      1

===== CHANNEL f1 =====
SFO1    100.6243395 MHz
NUC1     13C
P1       10.90 usec
PLW1    43.00000000 W

===== CHANNEL f2 =====
SFO2    400.1316005 MHz
NUC2     1H
CPDPRG[2] waltz16
PCPD2   90.00 usec
PLW2    10.50000000 W
PLW12   0.29166999 W
PLW13   0.14670999 W

F2 - Processing parameters
SI       65536
SF       100.6127690 MHz
WDW      EM
SSB      0
LB       1.00 Hz
GB       0
PC       1.40
```



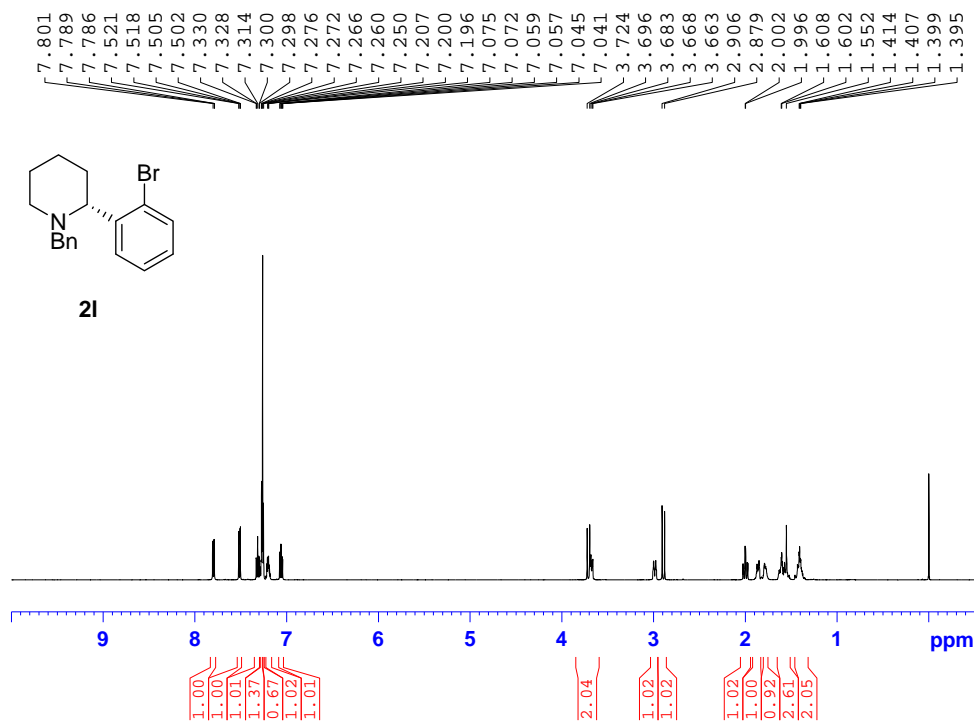

Current Data Parameters  
 NAME 10933-112  
 EXPNO 1  
 PROCNO 1

F2 - Acquisition Parameters  
 Date\_ 20160915  
 Time 17.13  
 INSTRUM spect  
 PROBHD 5 mm PABBO BB/  
 PULPROG zg10  
 TD 32768  
 SOLVENT CDC13  
 NS 16  
 DS 0  
 SWH 7500.000 Hz  
 FIDRES 0.228882 Hz  
 AQ 2.1845334 sec  
 RG 512  
 DW 66.667 usec  
 DE 6.50 usec  
 TE 299.0 K  
 D1 1.00000000 sec  
 TD0 1

===== CHANNEL f1 =====  
 SFO1 500.1325007 MHz  
 NUC1 1H  
 P1 14.00 usec  
 PLW1 18.79999924 W

F2 - Processing parameters  
 SI 16384  
 SF 500.1300164 MHz  
 WDW EM  
 SSB 0  
 LB 0.30 Hz  
 GB 0  
 PC 1.00

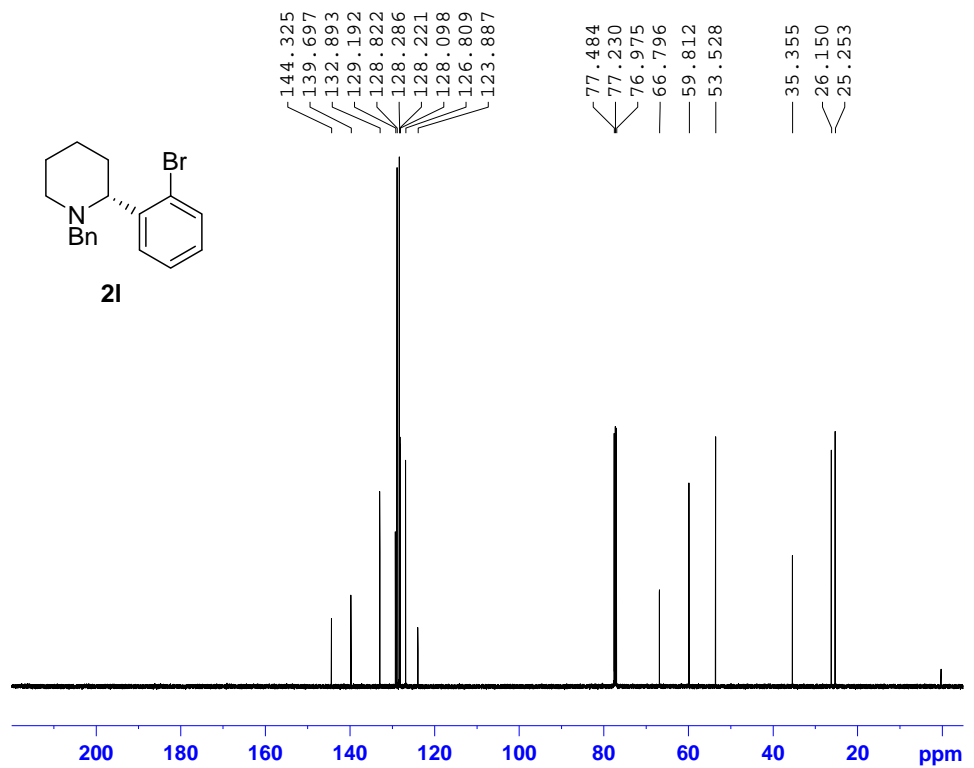

Current Data Parameters  
 NAME 10933-112  
 EXPNO 2  
 PROCNO 1

F2 - Acquisition Parameters  
 Date\_ 20160915  
 Time 20.33  
 INSTRUM spect  
 PROBHD 5 mm PABBO BB/  
 PULPROG zgpg  
 TD 262144  
 SOLVENT CDC13  
 NS 1024  
 DS 0  
 SWH 31250.000 Hz  
 FIDRES 0.119209 Hz  
 AQ 4.1943040 sec  
 RG 2050  
 DW 16.000 usec  
 DE 6.50 usec  
 TE 298.9 K  
 D1 1.00000000 sec  
 D11 0.03000000 sec  
 TD0 1

===== CHANNEL f1 =====  
 SFO1 125.7698617 MHz  
 NUC1 13C  
 P1 10.00 usec  
 PLW1 99.50000000 W

===== CHANNEL f2 =====  
 SFO2 500.1325007 MHz  
 NUC2 1H  
 CPDPRG[2] waltz16  
 PCPD2 80.00 usec  
 PLW2 18.79999924 W  
 PLW12 0.57574999 W  
 PLW13 0.28960001 W

F2 - Processing parameters  
 SI 131072  
 SF 125.7577628 MHz  
 WDW EM  
 SSB 0  
 LB 0.30 Hz  
 GB 0  
 PC 1.40

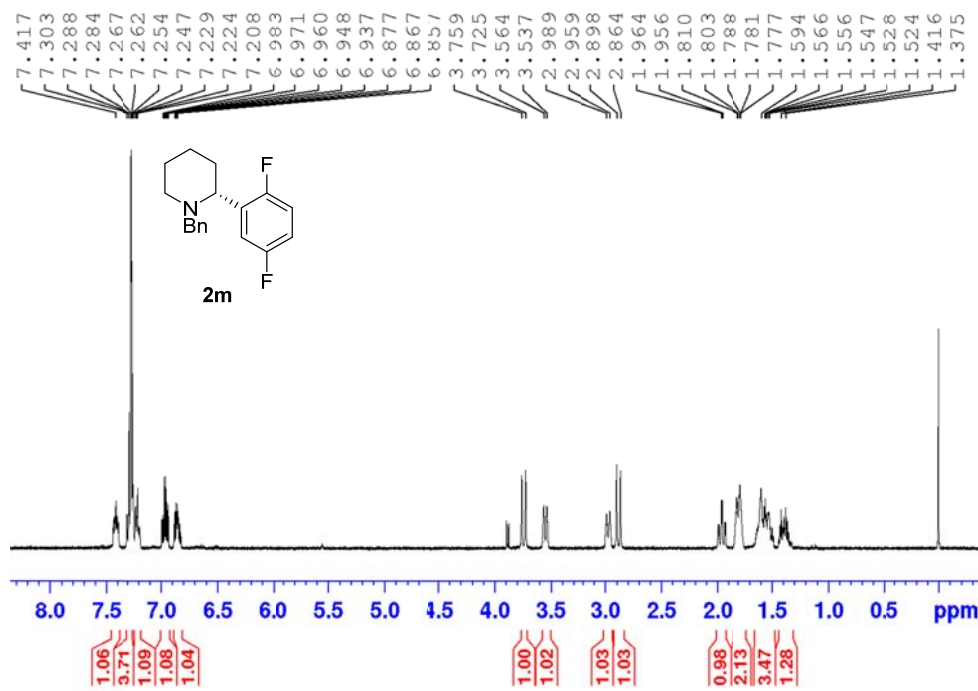

Current Data Parameters  
 NAME 10967-055  
 EXPNC 1  
 PROCNO 1

F2 - Acquisition Parameters  
 Date\_ 20170421  
 Time 17.48  
 INSTRUM spect  
 PROBHD 5 mm PABBO BB-  
 PULPROG zg10  
 TD 32768  
 SOLVENT CDC13  
 NS 4  
 DS 4  
 SWH 5896.227 Hz  
 FIDRES 0.179939 Hz  
 AQ 2.7787263 sec  
 RG 512  
 DW 84.800 usec  
 DE 6.50 usec  
 TE 298.0 K  
 D1 2.00000030 sec  
 TD0 1

==== CHANNEL f1 =====  
 SF01 400.1327209 MHz  
 NUC1 1H  
 P1 15.00 usec  
 PLW1 10.50000030 W

F2 - Processing parameters  
 SI 65536  
 SF 400.1300125 MHz  
 WDW EM  
 SSB 0  
 LB 0.05 Hz  
 GB 0  
 PC 1.00

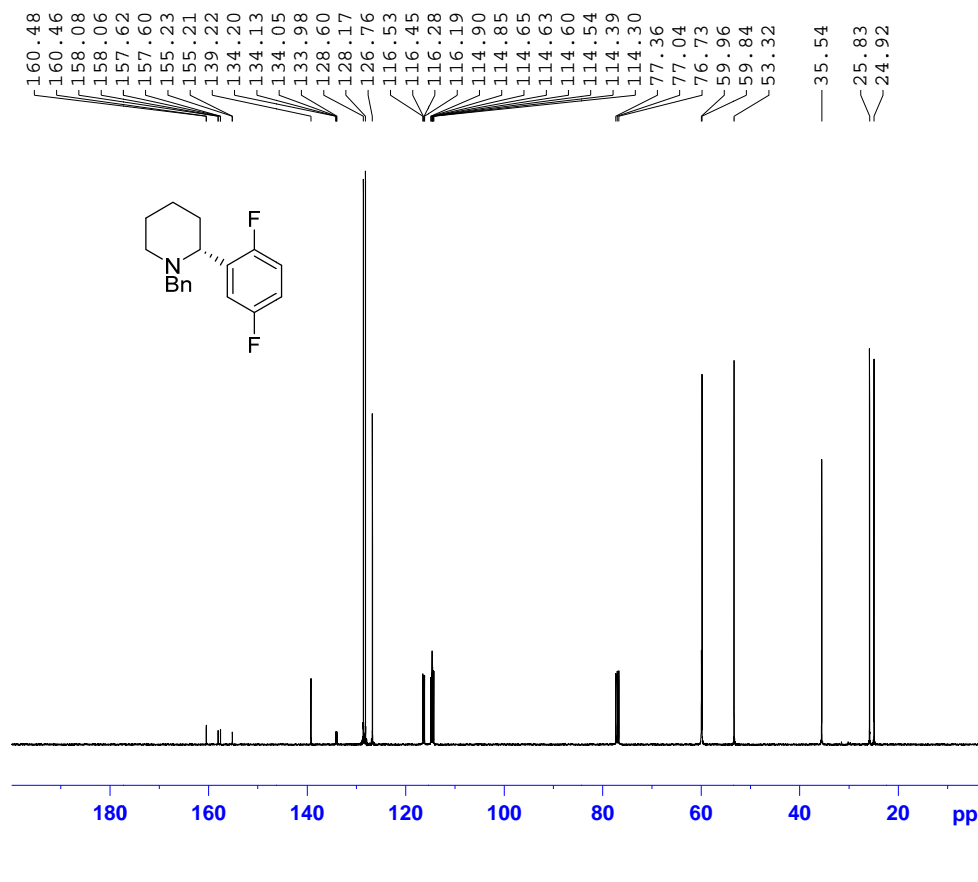

Current Data Parameters  
 NAME 10967-055-pp  
 EXPNO 3  
 PROCNO 1

F2 - Acquisition Parameters  
 Date\_ 20180207  
 Time 21.04  
 INSTRUM spect  
 PROBHD 5 mm PABBO BB-  
 PULPROG zgpg  
 TD 32768  
 SOLVENT CDC13  
 NS 2560  
 DS 4  
 SWH 24038.461 Hz  
 FIDRES 0.733596 Hz  
 AQ 0.6815744 sec  
 RG 2050  
 DW 20.800 usec  
 DE 6.50 usec  
 TE 298.0 K  
 D1 2.00000000 sec  
 D11 0.03000000 sec  
 TD0 1

==== CHANNEL f1 =====  
 SF01 100.6243395 MHz  
 NUC1 13C  
 P1 10.90 usec  
 PLW1 43.00000000 W

==== CHANNEL f2 =====  
 SF02 400.1316005 MHz  
 NUC2 1H  
 CPDPRG2 waltz16  
 PCPD2 90.00 usec  
 PLW2 10.50000000 W  
 PLW12 0.29166999 W  
 PLW13 0.14670999 W

F2 - Processing parameters  
 SI 65536  
 SF 100.6127690 MHz  
 WDW EM  
 SSB 0  
 LB 1.00 Hz  
 GB 0  
 PC 1.40

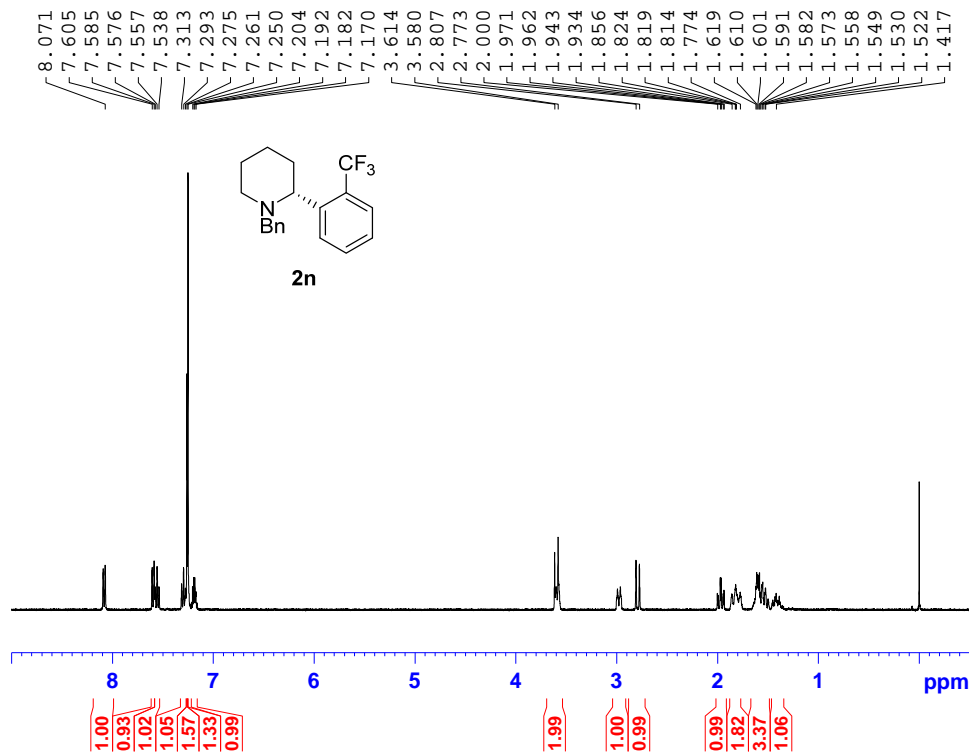

```

Current Data Parameters
NAME      10967-004
EXPNO    1
PROCNO   1

F2 - Acquisition Parameters
Date_    20170421
Time     17.30
INSTRUM  spect
PROBHD   5 mm PABBO BB-
PULPROG  zg10
TD       32768
SOLVENT  CDCl3
NS       4
DS       4
SWH      5896.227 Hz
FIDRES   0.179939 Hz
AQ       2.7787263 sec
RG       575
DW       84.800 usec
DE       6.50 usec
TE       298.0 K
D1       2.0000000 sec
TD0      1

===== CHANNEL f1 =====
SF01    400.1327209 MHz
NUC1     1H
P1       15.00 usec
PLW1    10.50000000 W

F2 - Processing parameters
SI       65536
SF       400.1300137 MHz
WDW      EM
SSB      0
LB       0.05 Hz
GB       0
PC       1.00
  
```

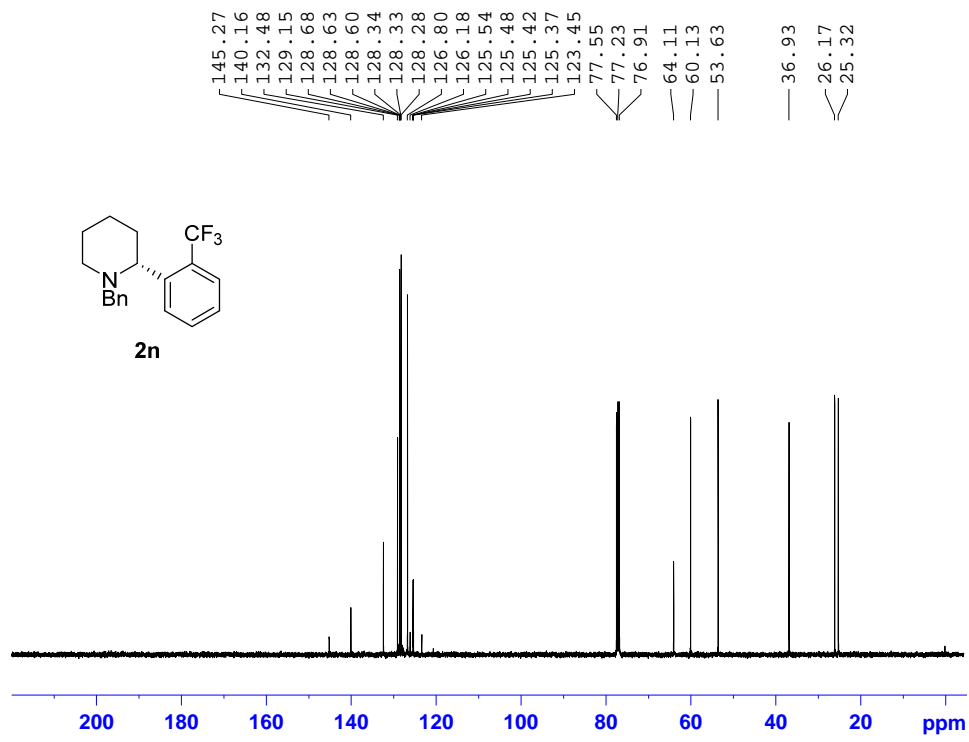

```

Current Data Parameters
NAME      10967-004
EXPNO    2
PROCNO   1

F2 - Acquisition Parameters
Date_    20170422
Time     2.03
INSTRUM  spect
PROBHD   5 mm PABBO BB-
PULPROG  zgpg
TD       32768
SOLVENT  CDCl3
NS       2500
DS       4
SWH      24038.461 Hz
FIDRES   0.733596 Hz
AQ       0.6815744 sec
RG       2050
DW       20.800 usec
DE       6.50 usec
TE       298.0 K
D1       2.0000000 sec
D11      0.03000000 sec
TD0      1

===== CHANNEL f1 =====
SF01    100.6243395 MHz
NUC1     13C
P1       10.90 usec
PLW1    43.00000000 W

===== CHANNEL f2 =====
SF02    400.1316005 MHz
NUC2     1H
CPDPRG[2] waltz16
PCPD2   90.00 usec
PLW2    10.50000000 W
PLW12   0.29166999 W
PLW13   0.14670999 W

F2 - Processing parameters
SI       65536
SF       100.6127477 MHz
WDW      EM
SSB      0
LB       1.00 Hz
GB       0
PC       1.40
  
```

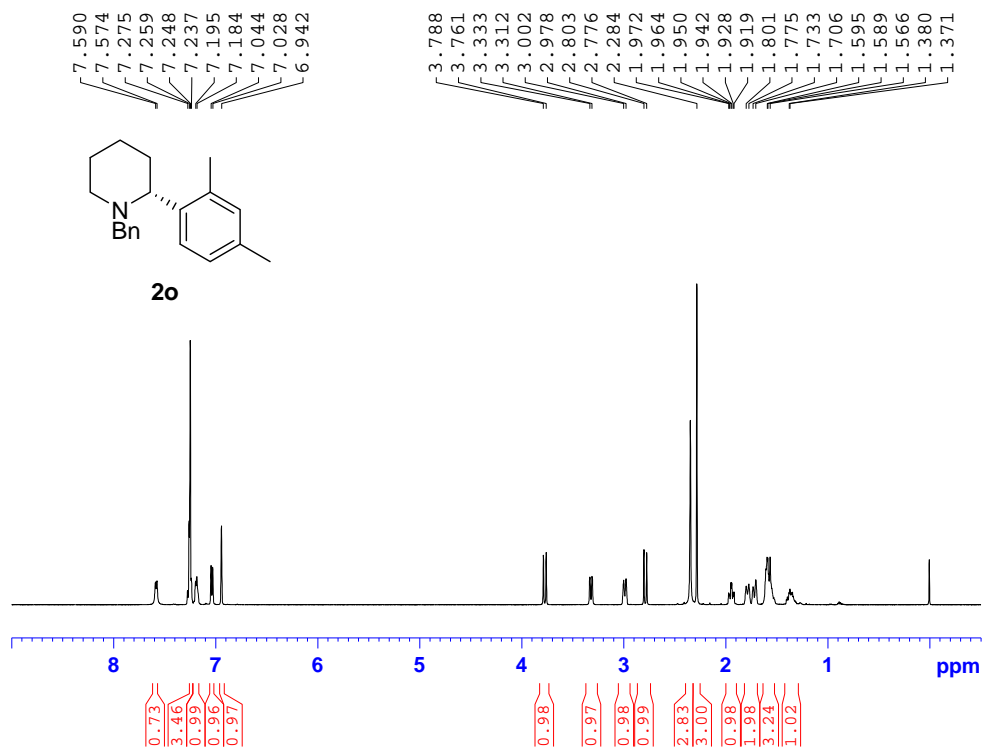

Current Data Parameters  
 NAME 10933-177  
 EXPNO 1  
 PROCNO 1

F2 - Acquisition Parameters  
 Date\_ 20161110  
 Time 2.25  
 INSTRUM spect  
 PROBHD 5 mm PABBO BB/  
 PULPROG zg10  
 TD 32768  
 SOLVENT CDCl3  
 NS 16  
 DS 0  
 SWH 7500.000 Hz  
 FIDRES 0.228882 Hz  
 AQ 2.1845334 sec  
 RG 406  
 DW 66.667 usec  
 DE 6.50 usec  
 TE 299.0 K  
 D1 1.00000000 sec  
 TD0 1

==== CHANNEL f1 =====  
 SFO1 500.1325007 MHz  
 NUC1 1H  
 P1 14.00 usec  
 PLW1 18.79999924 W

F2 - Processing parameters  
 SI 16384  
 SF 500.1300157 MHz  
 WDW EM  
 SSB 0  
 LB 0.30 Hz  
 GB 0  
 PC 1.00

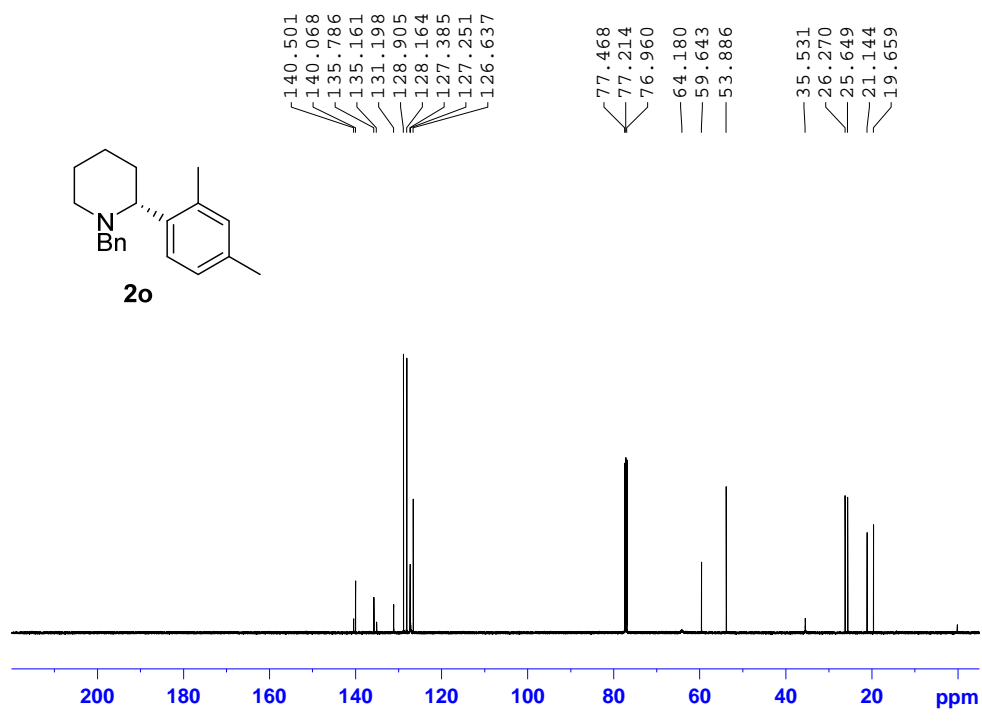

Current Data Parameters  
 NAME 10933-177  
 EXPNO 2  
 PROCNO 1

F2 - Acquisition Parameters  
 Date\_ 20161110  
 Time 4.38  
 INSTRUM spect  
 PROBHD 5 mm PABBO BB/  
 PULPROG zgpg  
 TD 262144  
 SOLVENT CDCl3  
 NS 1500  
 DS 0  
 SWH 31250.000 Hz  
 FIDRES 0.119209 Hz  
 AQ 4.1943040 sec  
 RG 2050  
 DW 16.000 usec  
 DE 6.50 usec  
 TE 299.1 K  
 D1 1.00000000 sec  
 D11 0.03000000 sec  
 TD0 1

==== CHANNEL f1 =====  
 SFO1 125.7698617 MHz  
 NUC1 13C  
 P1 10.00 usec  
 PLW1 99.50000000 W

==== CHANNEL f2 =====  
 SFO2 500.1325007 MHz  
 NUC2 1H  
 CPDPRG[2] waltz16  
 PCPD2 80.00 usec  
 PLW2 18.79999924 W  
 PLW12 0.57574999 W  
 PLW13 0.28960001 W

F2 - Processing parameters  
 SI 131072  
 SF 125.7577653 MHz  
 WDW EM  
 SSB 0  
 LB 0.30 Hz  
 GB 0  
 PC 1.40

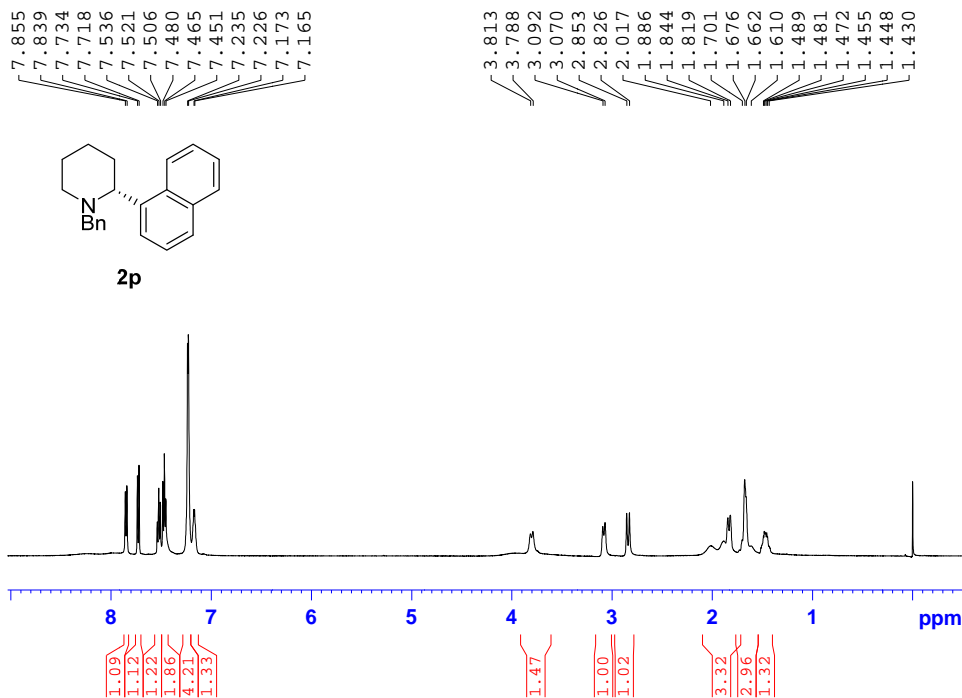

```

Current Data Parameters
NAME      10967-099-1
EXPNO    1
PROCNO   1

F2 - Acquisition Parameters
Date_    20170404
Time     21.03
INSTRUM  spect
PROBHD   5 mm PABBO BB-
PULPROG  zg10
TD       32768
SOLVENT  CDCl3
NS       16
DS       0
SWH      7500.000 Hz
FIDRES   0.228882 Hz
AQ       2.1845334 sec
RG       287
DW       66.667 usec
DE       6.50 usec
TE       299.0 K
D1       1.00000000 sec
TD0      1

===== CHANNEL f1 =====
SF01    500.1325007 MHz
NUC1     1H
P1       11.75 usec
PLW1    18.39999962 W

F2 - Processing parameters
SI       16384
SF       500.1300230 MHz
WDW      EM
SSB      0
LB       0.30 Hz
GB       0
PC       1.00
  
```

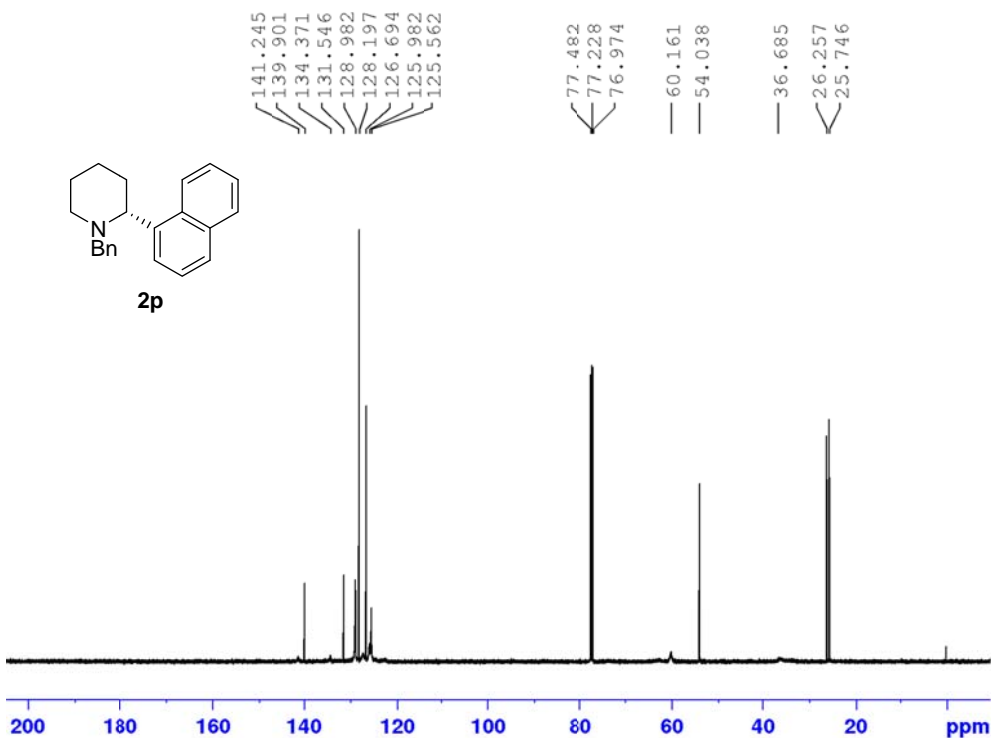

```

Current Data Parameters
NAME      10967-099-1
EXINO    2
PROCNO   1

F2 - Acquisition Parameters
Date_    20170405
Time     0
INSTRUM  spect
PROBHD   5 mm PABBO BB-
PULPROG  zgpg
TD       262144
SOLVENT  CDCl3
NS       2030
DS       0
SWE      31250.000 Hz
FIDRES   0.119209 Hz
AQ       4.1943010 sec
RG       2050
DW       16.020 usec
DE       6.50 usec
TE       299.0 K
D1       1.00000000 sec
D11      0.03000000 sec
TD0      1

===== CHANNEL f1 =====
SF01    125.7698617 MHz
NUC1     13C
P1       9.75 usec
PLW1    126.00000000 W

===== CHANNEL f2 =====
SF02    500.1325007 MHz
NUC2     1H
CPEPRG[2] waltz16
PCED2   80.00 usec
PLW2    18.39999952 W
PLW12   0.41056001 W
PLW13   0.20651001 W

F2 - Processing parameters
SI       131072
SF       125.7577645 MHz
WDW      EM
SSB      0
LB       0.30 Hz
GB       0
PC       1.40
  
```

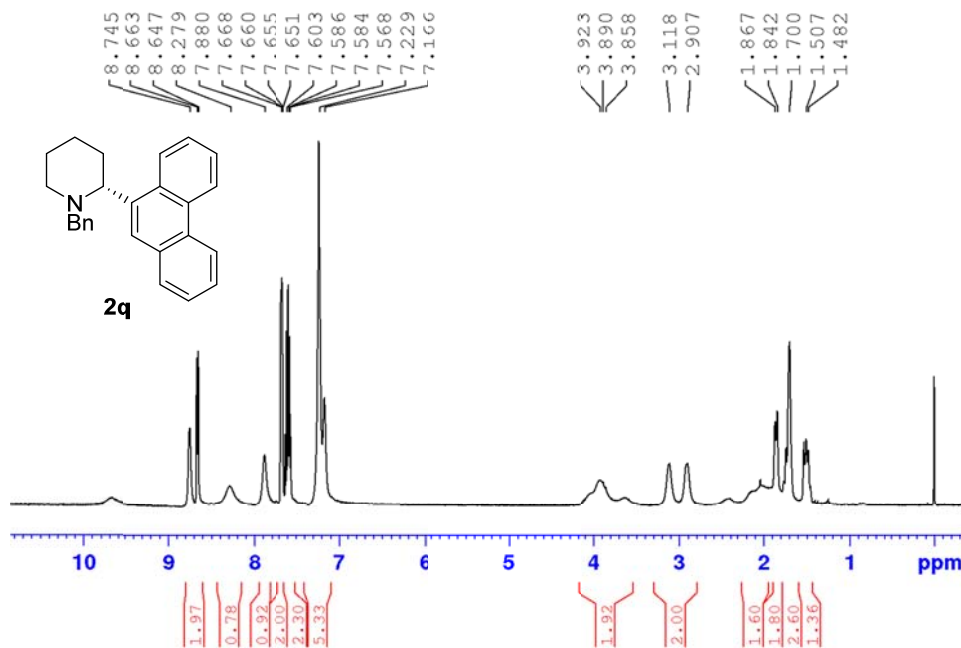

Current Data Parameters  
 NAME 10967-052  
 EXPNC 1  
 PROCNO 1

F2 - Acquisition Parameters  
 Date\_ 20170113  
 Time 16.29  
 INSTRUM spect  
 PROBHD 5 mm PABBO BB/  
 PULPROG zg'0  
 TD 32768  
 SOLVENT CDC13  
 NS 16  
 DS 0  
 SWH 7500.000 Hz  
 FIDRES 0.228832 Hz  
 AQ 2.1845334 sec  
 RG 362  
 DW 66.667 usec  
 DE 6.50 usec  
 TE 299.0 K  
 D1 1.00000000 sec  
 TD0 1

----- CHANNEL f1 -----  
 SFO1 500.1325007 MHz  
 NUC1 1H  
 P1 14.00 usec  
 PLW1 18.79999924 W

F2 - Processing parameters  
 SI 16384  
 SF 500.1300257 MHz  
 WDW EM  
 SSB 0  
 LB 0.30 Hz  
 GB 0  
 PC 1.00

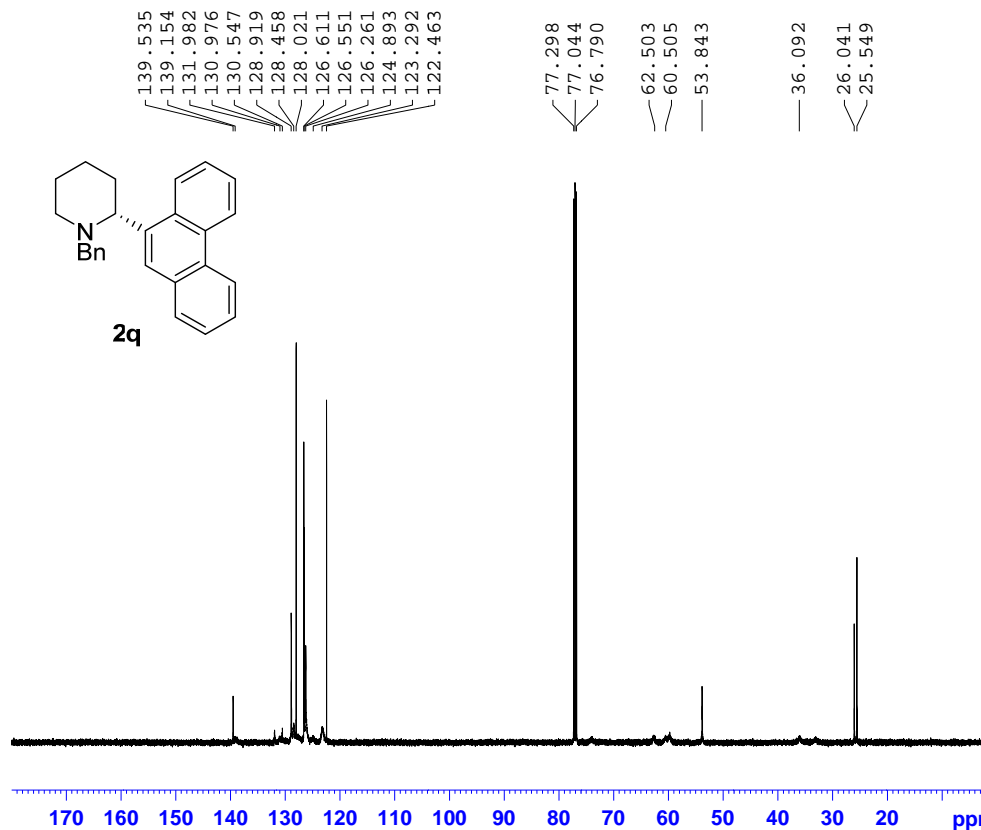

Current Data Parameters  
 NAME 10967-052  
 EXPNO 2  
 PROCNO 1

F2 - Acquisition Parameters  
 Date\_ 20170114  
 Time 16.34  
 INSTRUM spect  
 PROBHD 5 mm PABBO BB/  
 PULPROG zgpg  
 TD 262144  
 SOLVENT CDC13  
 NS 1500  
 DS 0  
 SWH 31250.000 Hz  
 FIDRES 0.119209 Hz  
 AQ 4.1943040 sec  
 RG 2050  
 DW 16.000 usec  
 DE 6.50 usec  
 TE 299.0 K  
 D1 1.00000000 sec  
 D11 0.03000000 sec  
 TD0 1

===== CHANNEL f1 =====  
 SFO1 125.7698617 MHz  
 NUC1 13C  
 P1 10.00 usec  
 PLW1 99.50000000 W

===== CHANNEL f2 =====  
 SFO2 500.1325007 MHz  
 NUC2 1H  
 CPDPRG[2] waltz16  
 PCPD2 80.00 usec  
 PLW2 18.79999924 W  
 PLW12 0.57574999 W  
 PLW13 0.28960001 W

F2 - Processing parameters  
 SI 131072  
 SF 125.7577890 MHz  
 WDW EM  
 SSB 0  
 LB 0.30 Hz  
 GB 0  
 PC 1.40

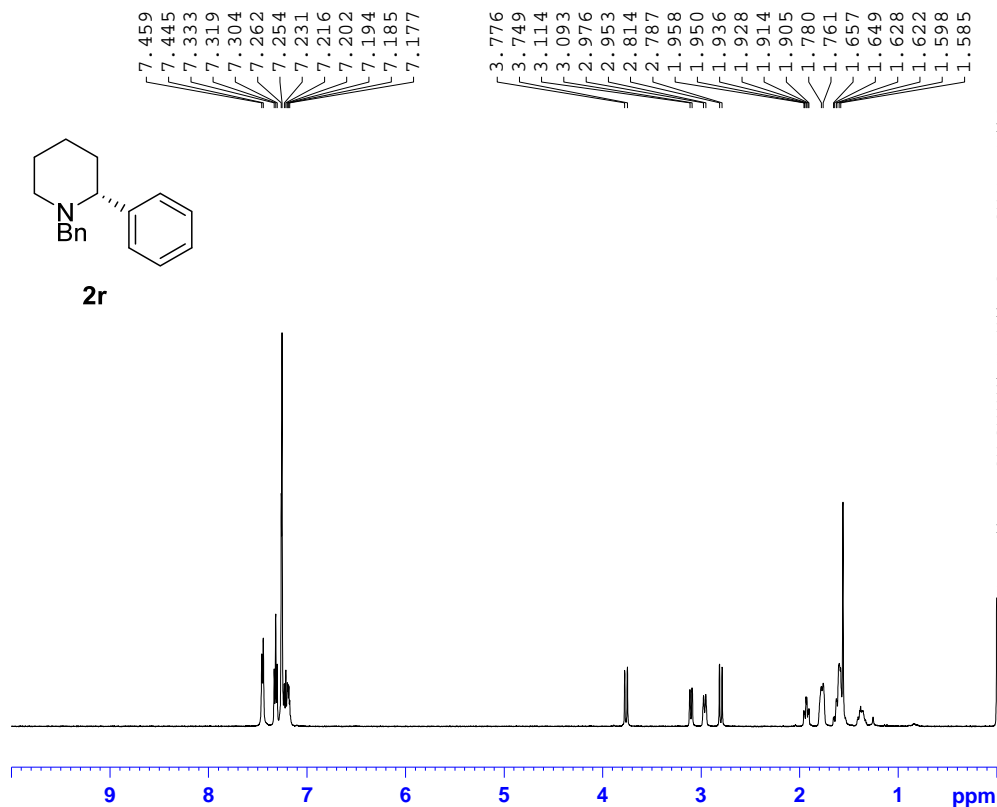

Current Data Parameters  
 NAME bqul-10967-170  
 EXPNO 1  
 PROCNO 1

F2 - Acquisition Parameters  
 Date\_ 20180201  
 Time 14.28  
 INSTRUM spect  
 PROBHD 5 mm PABBO BB/  
 PULPROG zg10  
 TD 32768  
 SOLVENT CDC13  
 NS 16  
 DS 0  
 SWH 7500.000 Hz  
 FIDRES 0.228882 Hz  
 AQ 2.1845334 sec  
 RG 645  
 DW 66.667 usec  
 DE 6.50 usec  
 TE 299.0 K  
 D1 1.00000000 sec  
 TD0 1

==== CHANNEL f1 =====  
 SFO1 500.1325007 MHz  
 NUC1 1H  
 P1 14.00 usec  
 PLW1 16.00000000 W

F2 - Processing parameters  
 SI 16384  
 SF 500.1300143 MHz  
 WDW EM  
 SSB 0  
 LB 0.30 Hz  
 GB 0  
 PC 1.00

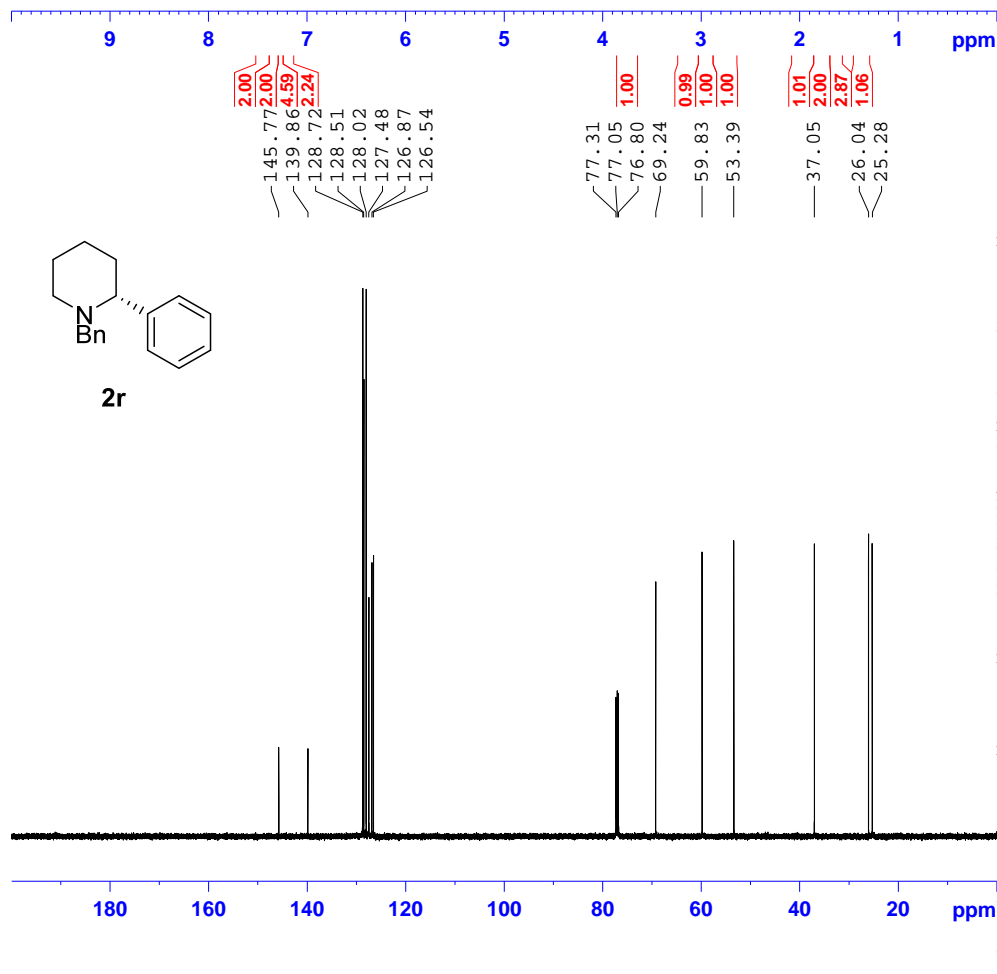

Current Data Parameters  
 NAME bqul-10967-170  
 EXPNO 2  
 PROCNO 1

F2 - Acquisition Parameters  
 Date\_ 20180201  
 Time 14.58  
 INSTRUM spect  
 PROBHD 5 mm PABBO BB/  
 PULPROG zgpg  
 TD 262144  
 SOLVENT CDC13  
 NS 256  
 DS 0  
 SWH 31250.000 Hz  
 FIDRES 0.119209 Hz  
 AQ 4.1943040 sec  
 RG 2050  
 DW 16.000 usec  
 DE 6.50 usec  
 TE 299.0 K  
 D1 1.00000000 sec  
 D11 0.03000000 sec  
 TD0 1

==== CHANNEL f1 =====  
 SFO1 125.7698617 MHz  
 NUC1 13C  
 P1 10.00 usec  
 PLW1 99.50000000 W

==== CHANNEL f2 =====  
 SFO2 500.1325007 MHz  
 NUC2 1H  
 CPDPRG[2] waltz16  
 PCPD2 80.00 usec  
 PLW2 16.00000000 W  
 PLW12 0.49000001 W  
 PLW13 0.24647000 W

F2 - Processing parameters  
 SI 131072  
 SF 125.7577890 MHz  
 WDW EM  
 SSB 0  
 LB 0.30 Hz  
 GB 0  
 PC 1.40

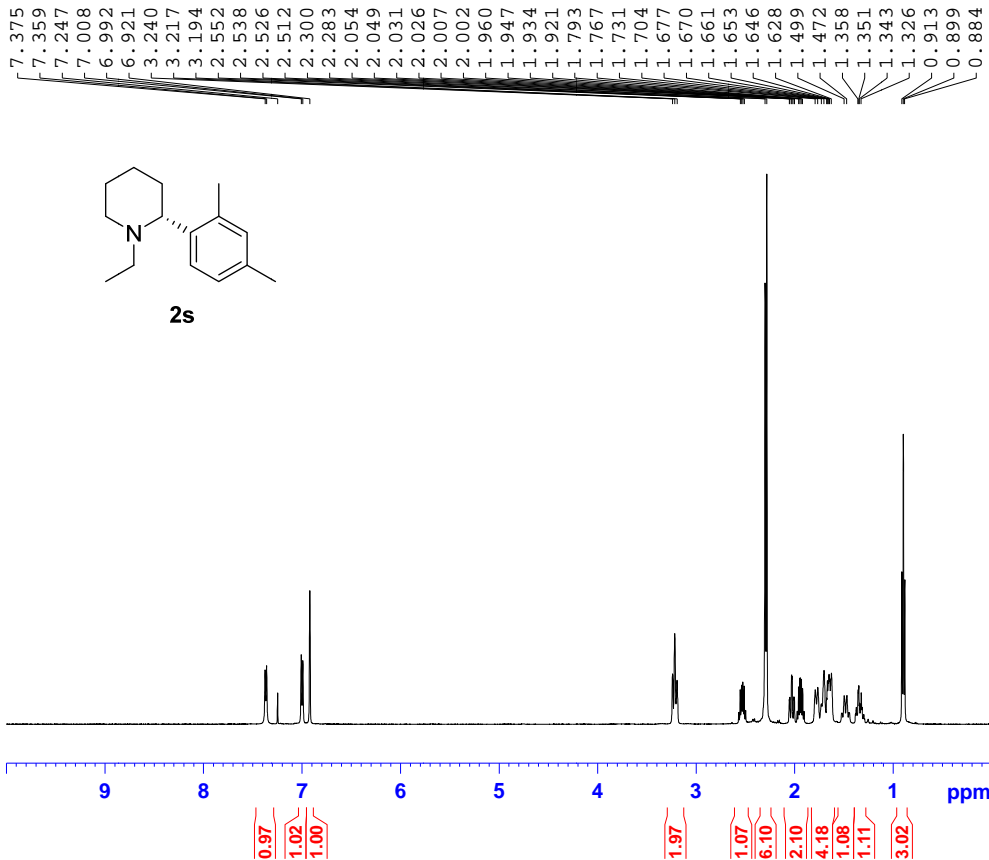

Current Data Parameters  
 NAME bqui-35793-4  
 EXPNO 1  
 PROCNO 1

F2 - Acquisition Parameters  
 Date\_ 20171219  
 Time 17.21  
 INSTRUM spect  
 PROBHD 5 mm PABBO BS/  
 PULPROG zg10  
 TD 32768  
 SOLVENT CDCl3  
 NS 16  
 DS 0  
 SWH 7500.000 Hz  
 FIDRES 0.228882 Hz  
 AQ 2.1845334 sec  
 RG 228  
 DW 66.667 usec  
 DE 6.50 usec  
 TE 299.0 K  
 D1 1.00000000 sec  
 TD0 1

==== CHANNEL f1 =====  
 SFO1 500.1325007 MHz  
 NUC1 1H  
 P1 14.00 usec  
 PLW1 16.00000000 W

F2 - Processing parameters  
 SI 16384  
 SF 500.1300182 MHz  
 WDW EM  
 SSB 0  
 LB 0.30 Hz  
 GB 0  
 PC 1.00

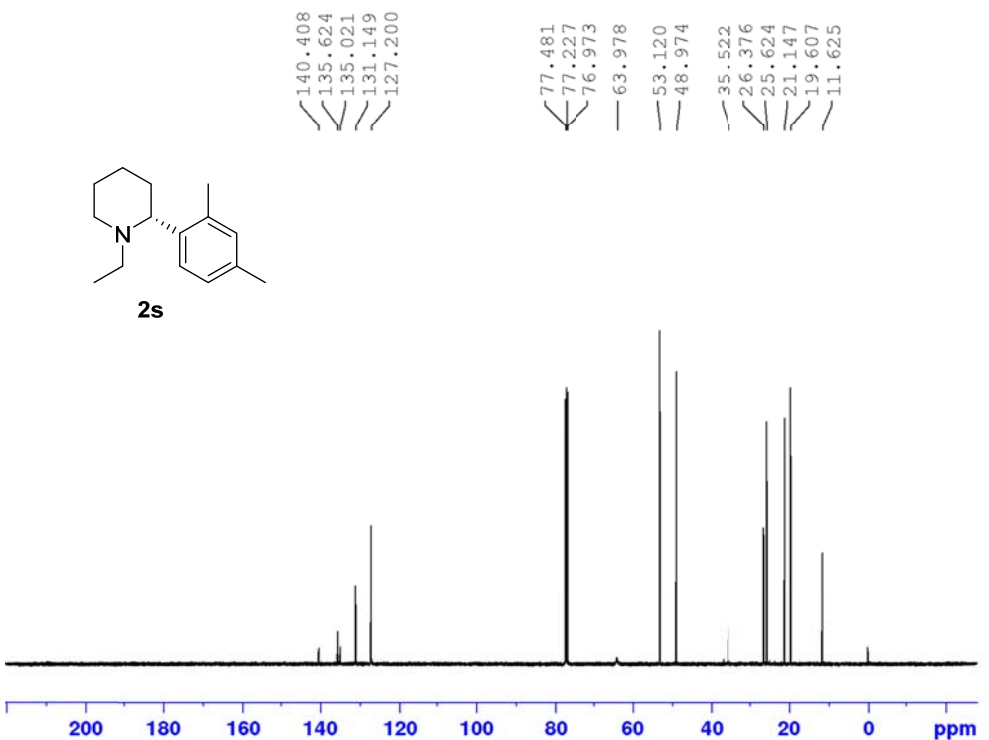

Current Data Parameters  
 NAME 10967-151  
 EXPNO 2  
 PROCNO 1

F2 - Acquisition Parameters  
 Date\_ 20170413  
 Time 2.19  
 INSTRUM spect  
 PROEHD 5 mm PABBO BS-  
 PULPROG zgpg  
 TD 262144  
 SOLVENT CDCl3  
 NS 1500  
 DS 0  
 SWH 31250.000 Hz  
 FIDRES 0.119209 Hz  
 AQ 4.1943040 sec  
 RG 2050  
 DW 16.000 usec  
 DE 6.50 usec  
 TE 299.0 K  
 D1 1.00000000 sec  
 D11 0.03000000 sec  
 TD0 1

==== CHANNEL f1 =====  
 SFO1 125.7698617 MHz  
 NUC1 13C  
 P1 9.75 usec  
 PLW1 126.00000000 W

==== CHANNEL f2 =====  
 SFO2 500.1325007 MHz  
 NUC2 1H  
 CPDPRG[2] waltz16  
 PCPE2 80.00 usec  
 PLW2 18.399999952 W  
 PLW12 0.41056001 W  
 PLW13 0.20651001 W

F2 - Processing parameters  
 SI 131072  
 SF 125.7577630 MHz  
 WDW EM  
 SSB 0  
 LB 0.30 Hz  
 GB 0  
 PC 1.40



### HPLC Spectra:

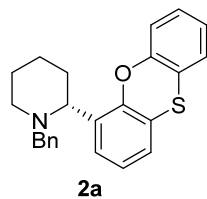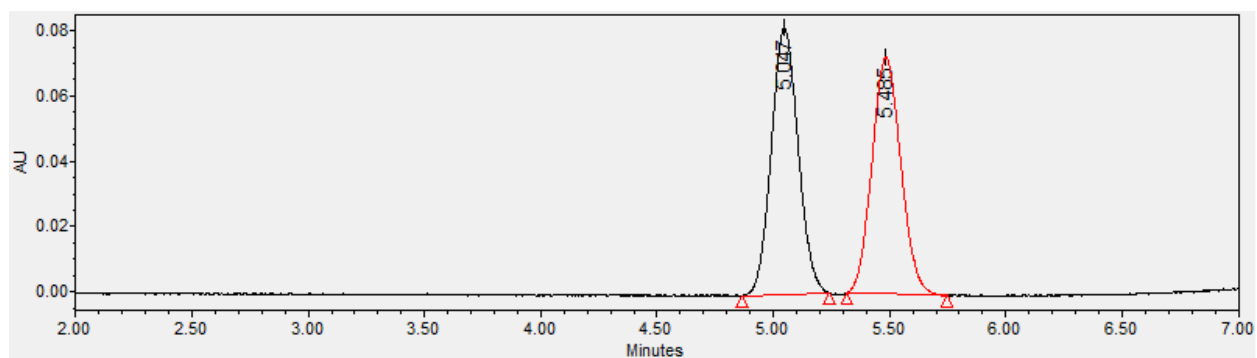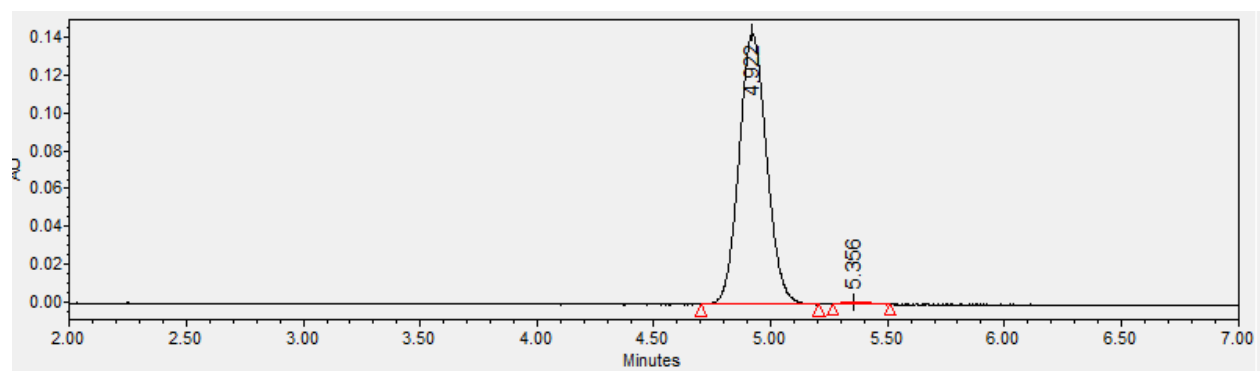

|   | RT    | Area    | % Area | Height |
|---|-------|---------|--------|--------|
| 1 | 4.922 | 1170432 | 99.31  | 142769 |
| 2 | 5.356 | 8166    | 0.69   | 1268   |

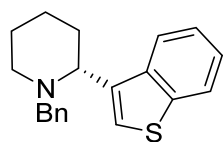

**2b**

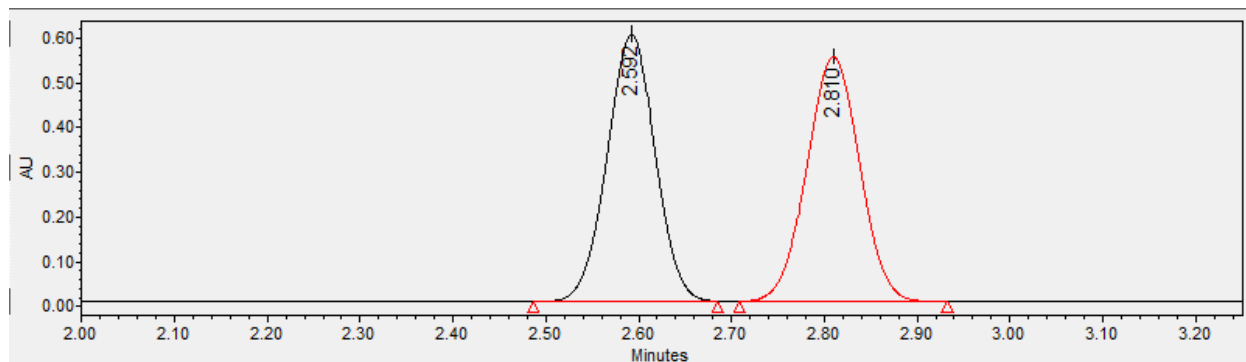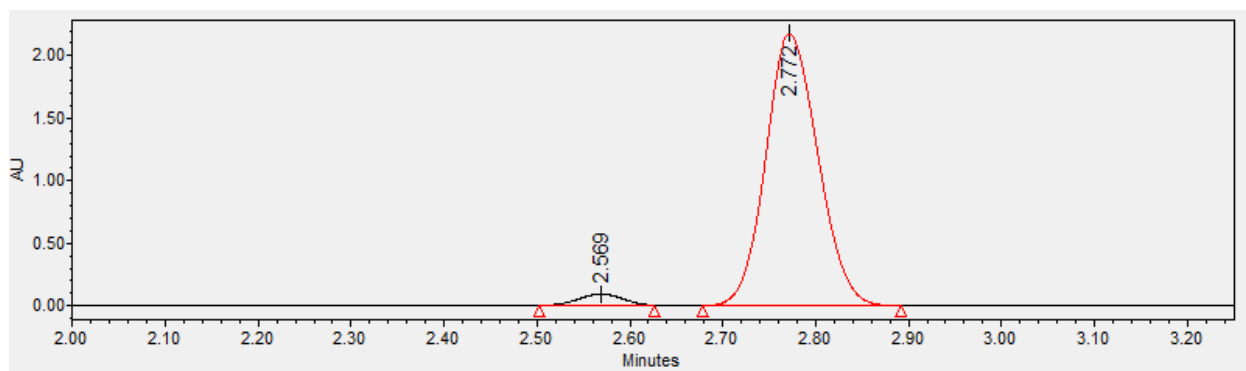

|   | RT    | Area    | % Area | Height  |
|---|-------|---------|--------|---------|
| 1 | 2.569 | 301912  | 3.41   | 91273   |
| 2 | 2.772 | 8549875 | 96.59  | 2171814 |

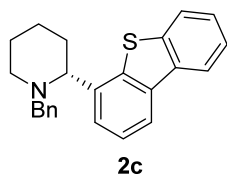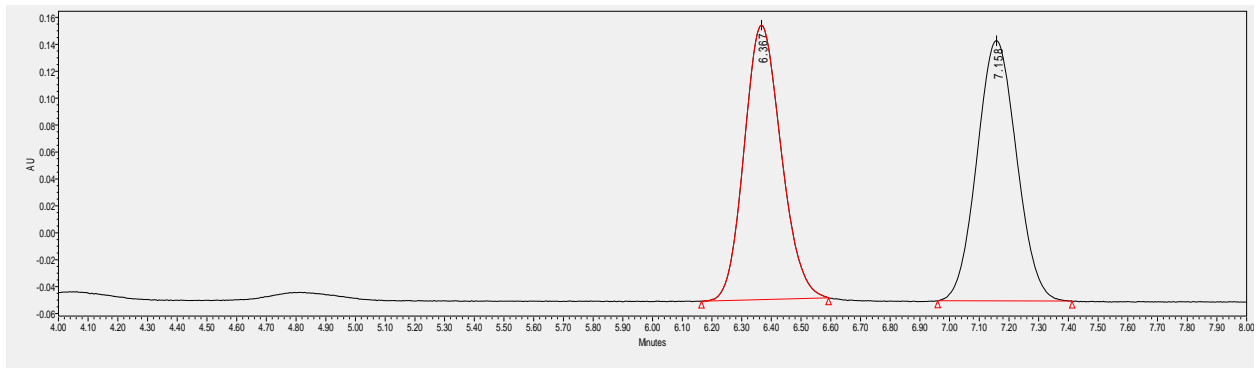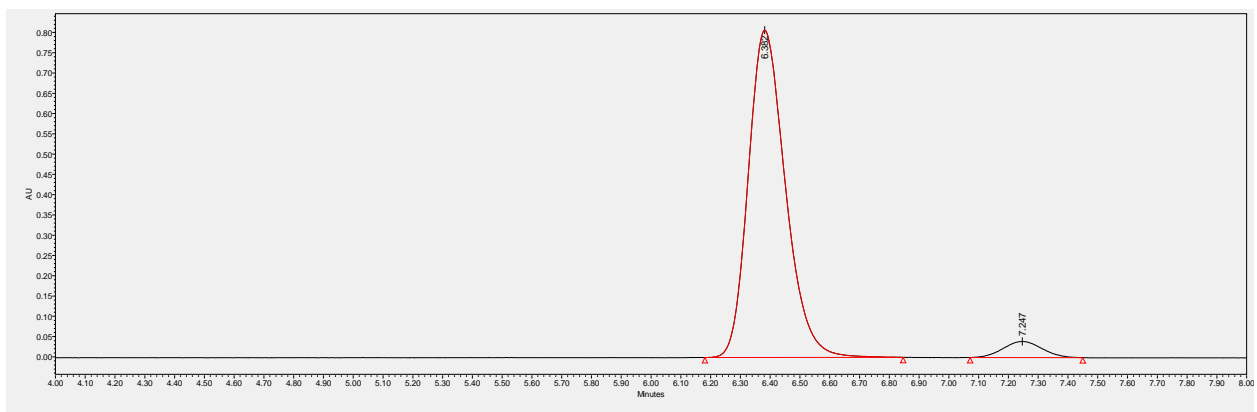

|   | RT    | Area    | % Area | Height |
|---|-------|---------|--------|--------|
| 1 | 6.382 | 6986628 | 95.08  | 807349 |
| 2 | 7.247 | 361667  | 4.92   | 39736  |

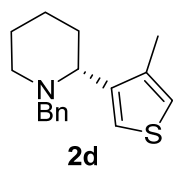

96.4:3.6 er

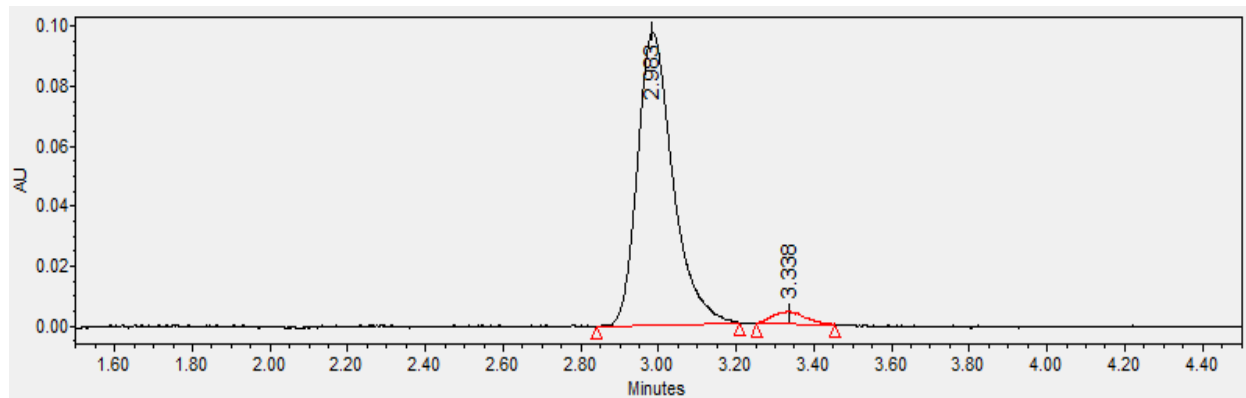

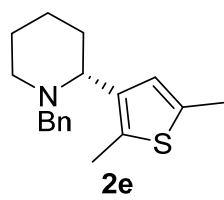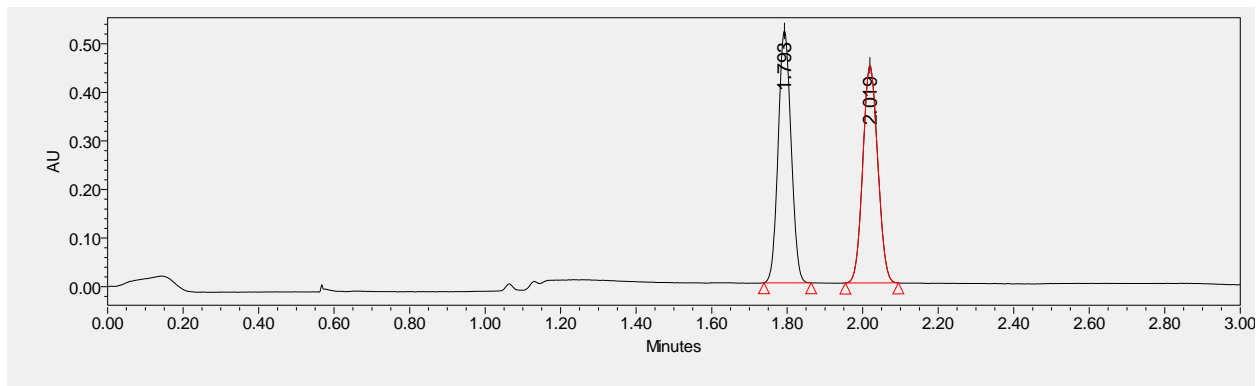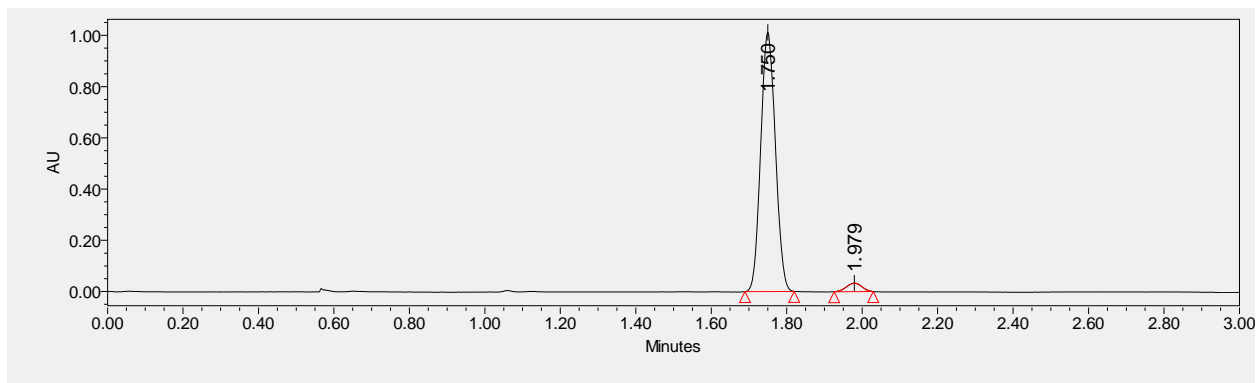

|   | RT    | Area    | % Area | Height |
|---|-------|---------|--------|--------|
| 1 | 1.750 | 2635222 | 96.70  | 973469 |
| 2 | 1.979 | 89900   | 3.30   | 31745  |

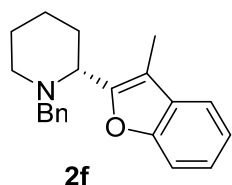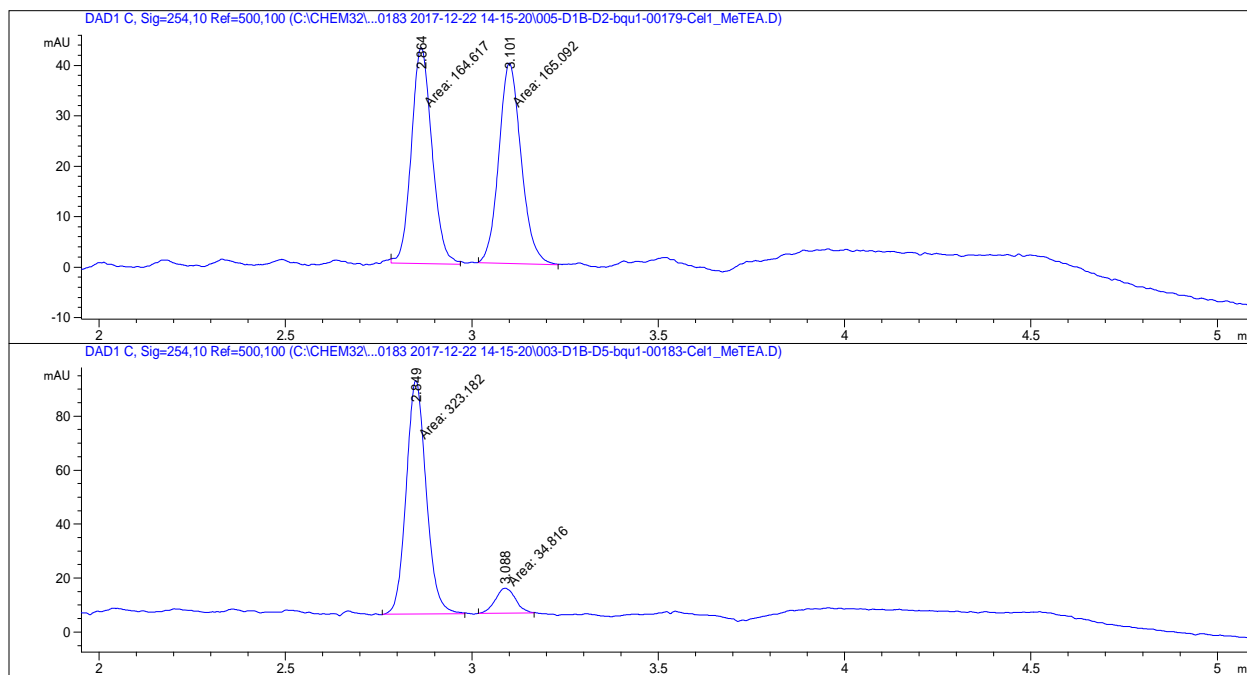

| Peak # | RetTime [min] | Type | Width [min] | Area [mAU*s] | Height [mAU] | Area %  |
|--------|---------------|------|-------------|--------------|--------------|---------|
| 1      | 2.849         | MM   | 0.0621      | 323.18152    | 86.66904     | 90.2748 |
| 2      | 3.088         | MM   | 0.0627      | 34.81601     | 9.25409      | 9.7252  |

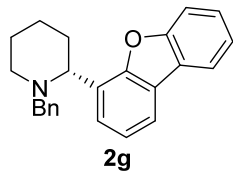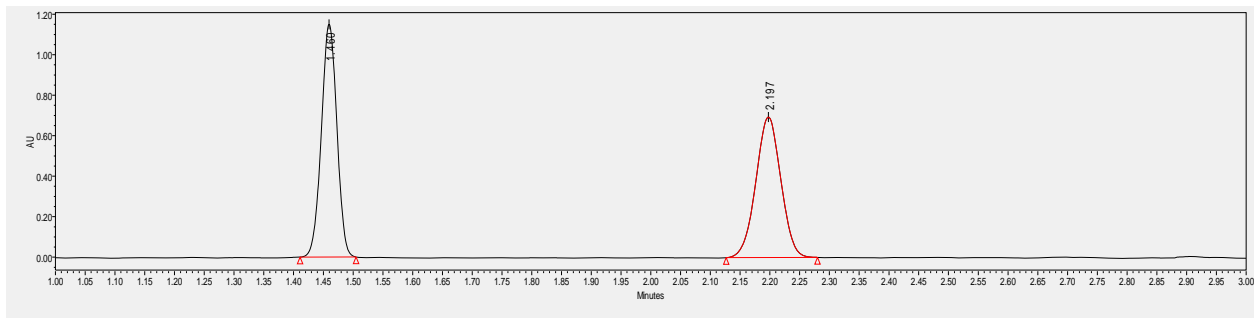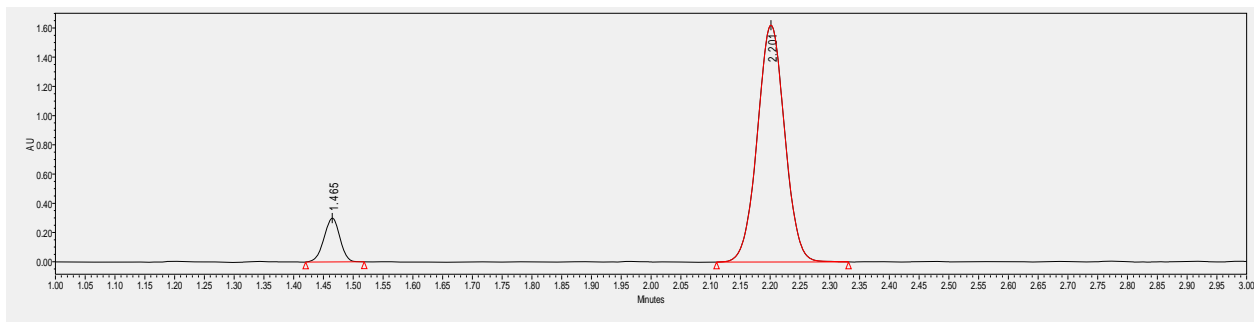

|   | RT    | Area    | % Area | Height  |
|---|-------|---------|--------|---------|
| 1 | 1.465 | 556314  | 9.71   | 300047  |
| 2 | 2.201 | 5172635 | 90.29  | 1621413 |

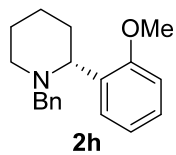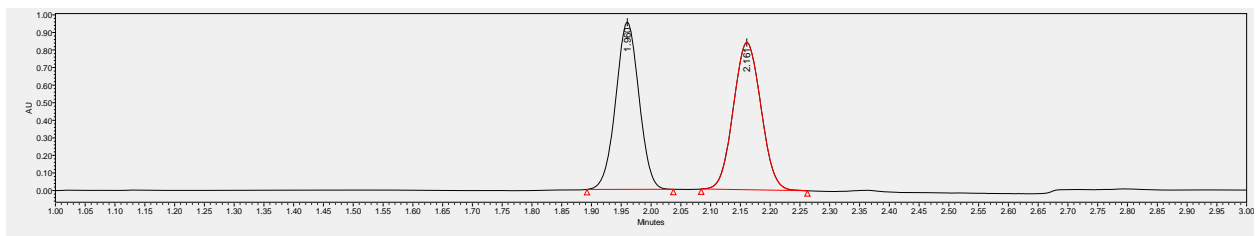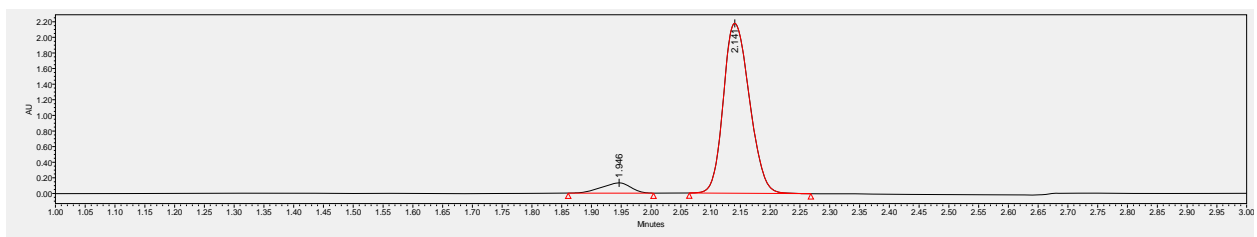

|   | RT    | Area    | % Area | Height  |
|---|-------|---------|--------|---------|
| 1 | 1.946 | 446219  | 6.31   | 131718  |
| 2 | 2.141 | 6622939 | 93.69  | 2176127 |



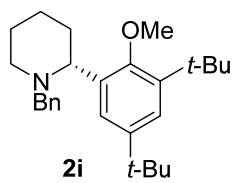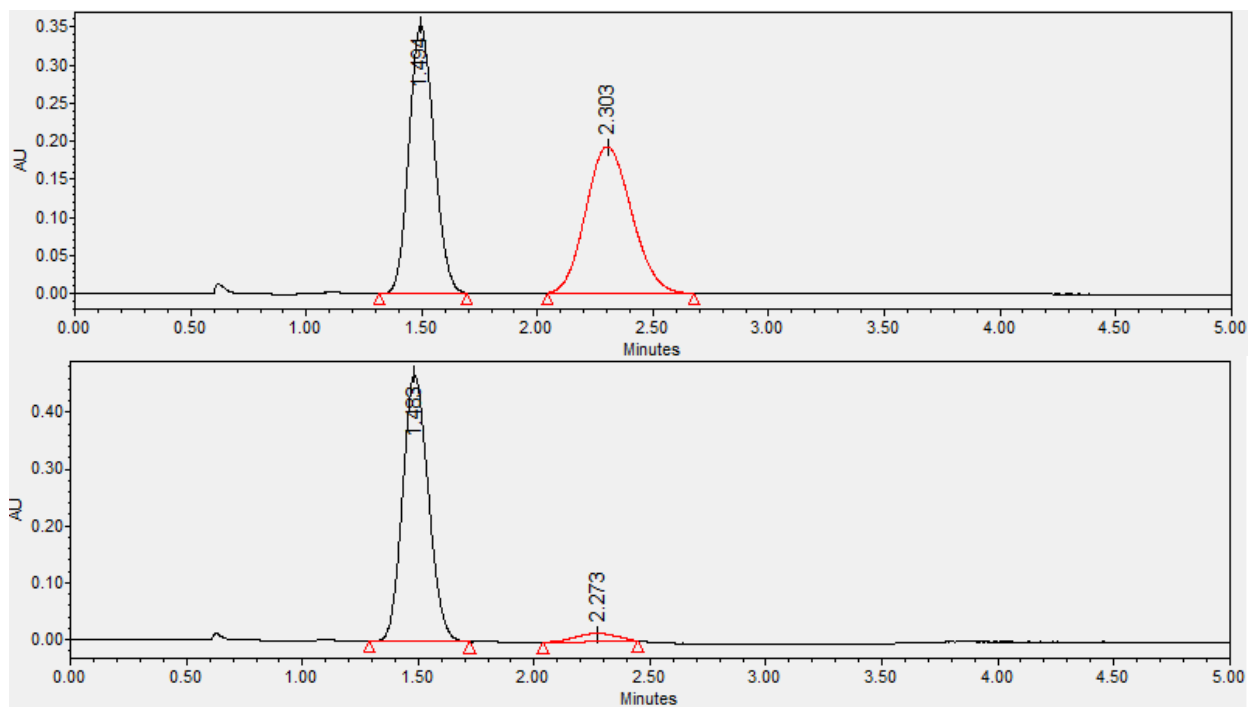

|   | RT    | Area    | % Area | Height |
|---|-------|---------|--------|--------|
| 1 | 1.483 | 3621779 | 95.27  | 468227 |
| 2 | 2.273 | 180002  | 4.73   | 14589  |

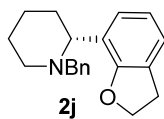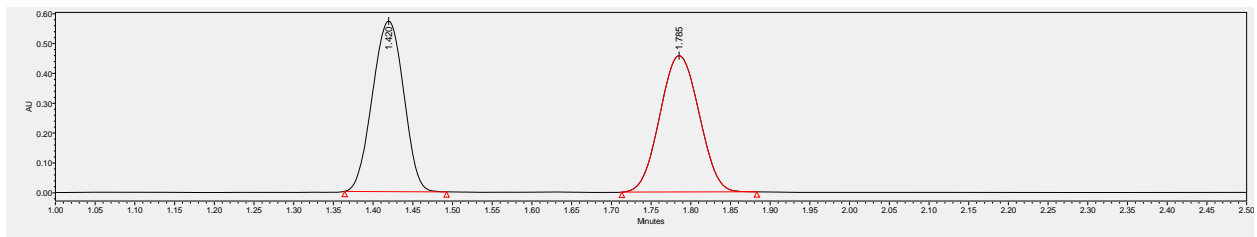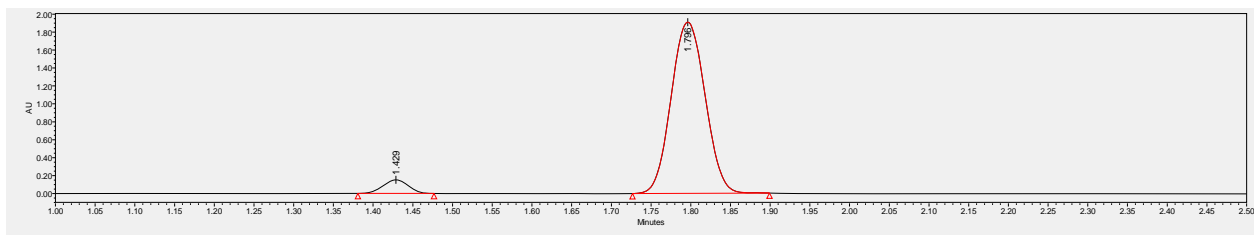

|   | RT    | Area    | % Area | Height  |
|---|-------|---------|--------|---------|
| 1 | 1.429 | 333888  | 5.55   | 151696  |
| 2 | 1.796 | 5679565 | 94.45  | 1908871 |

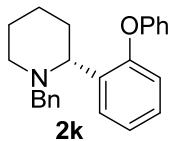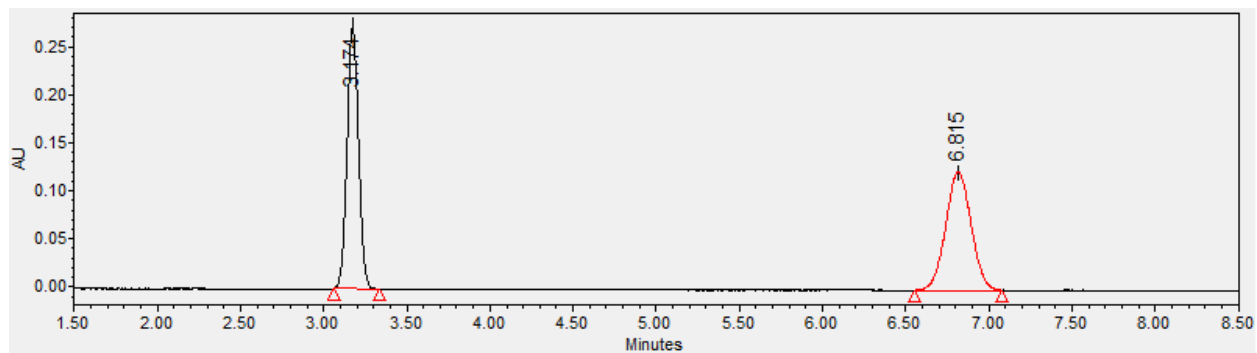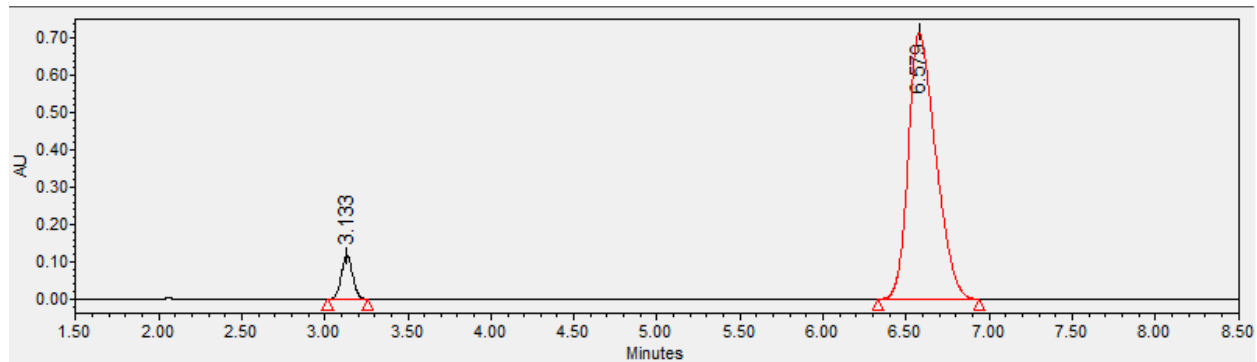

|   | RT    | Area    | % Area | Height |
|---|-------|---------|--------|--------|
| 1 | 3.133 | 554702  | 6.31   | 117058 |
| 2 | 6.579 | 8238557 | 93.69  | 715916 |

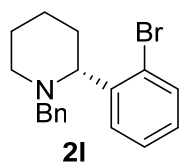

95.5:4.5 er

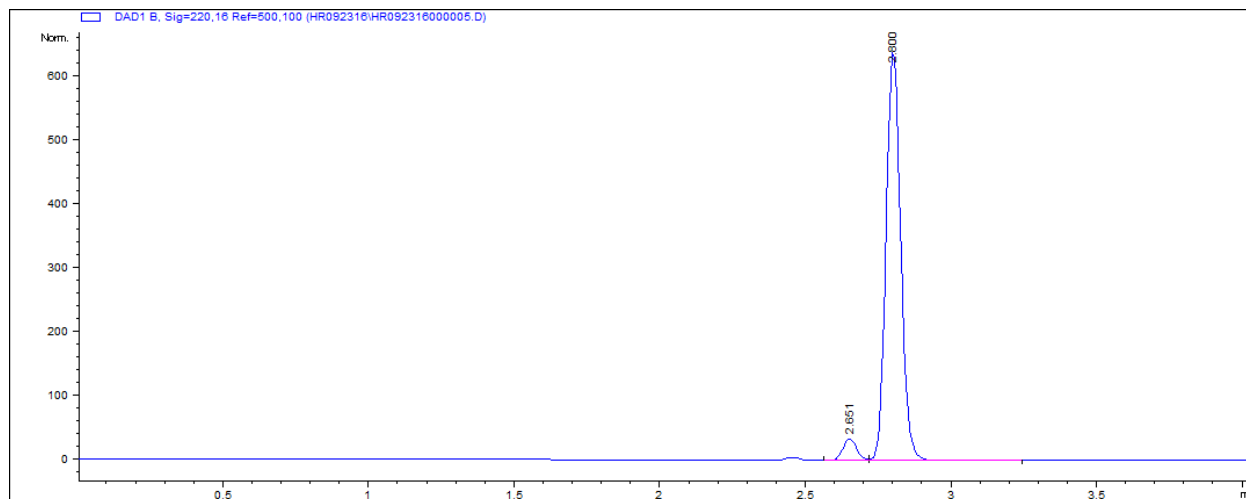

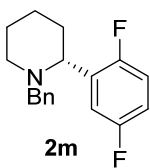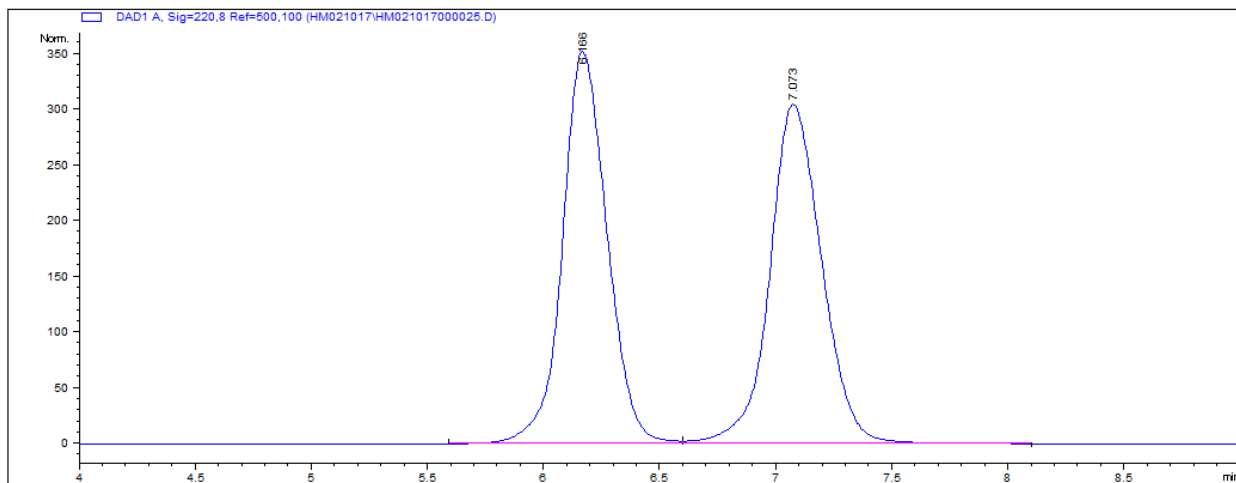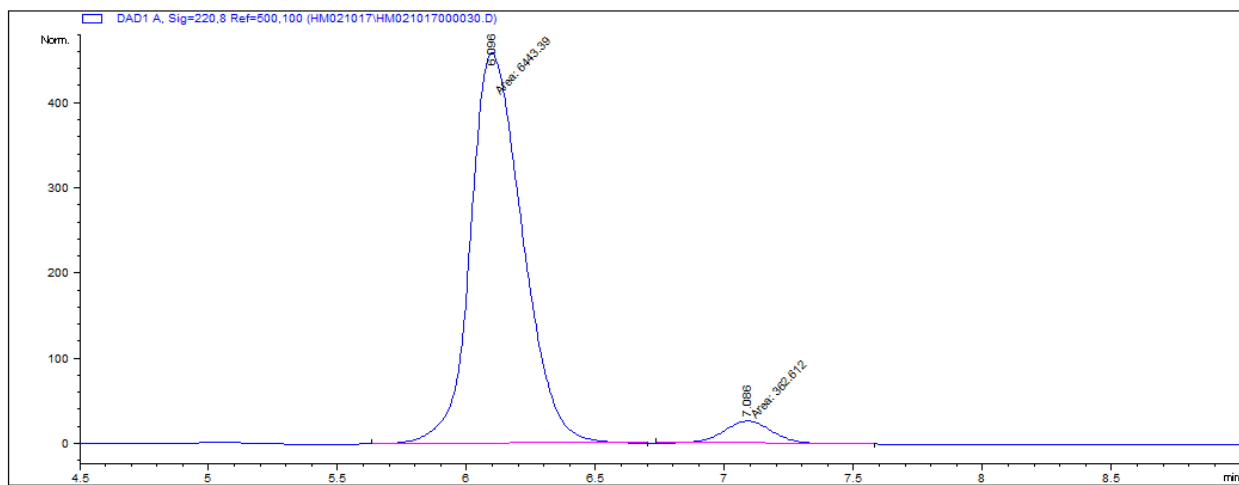

| # | Time  | Area   | Height | Width  | Area%  | Symmetry |
|---|-------|--------|--------|--------|--------|----------|
| 1 | 6.096 | 6443.4 | 459    | 0.234  | 94.672 | 0.7      |
| 2 | 7.086 | 362.6  | 26.5   | 0.2279 | 5.328  | 0.928    |

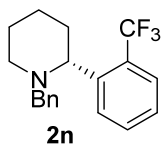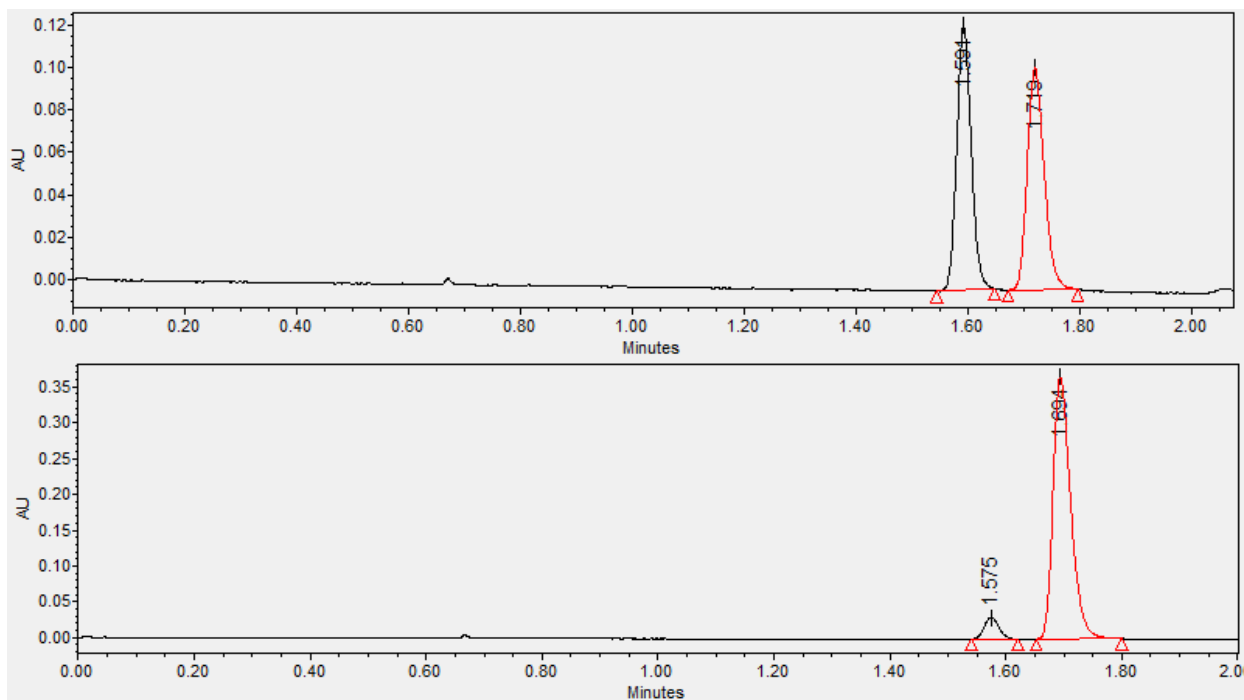

|   | RT    | Area   | % Area | Height |
|---|-------|--------|--------|--------|
| 1 | 1.575 | 54068  | 6.53   | 30567  |
| 2 | 1.694 | 773491 | 93.47  | 365132 |

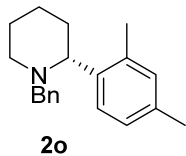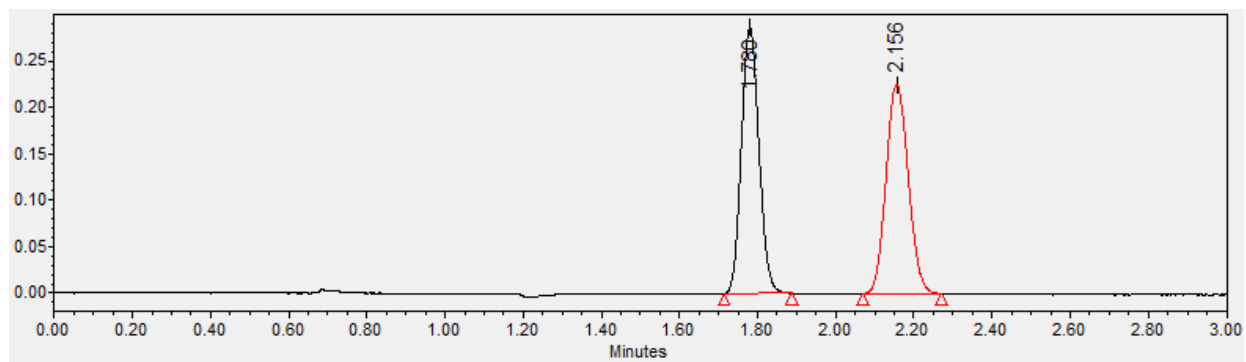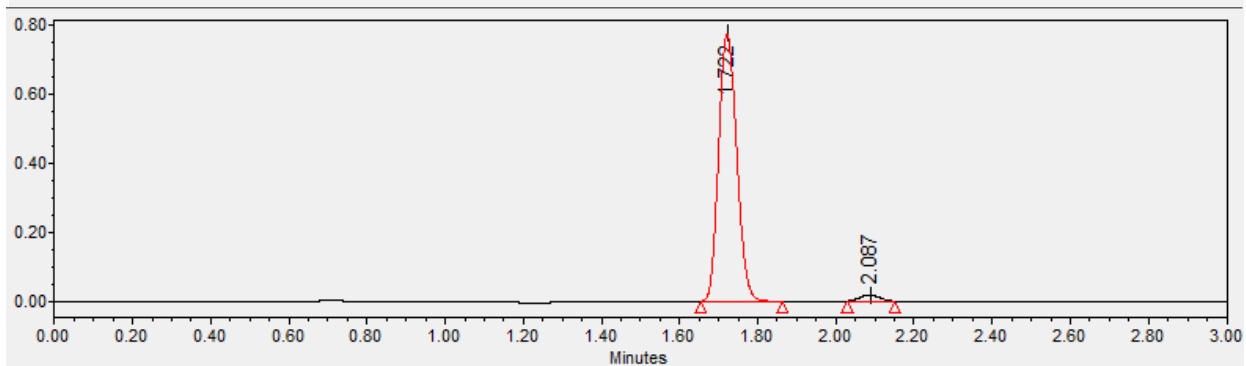

|   | RT    | Area    | % Area | Height |
|---|-------|---------|--------|--------|
| 1 | 1.722 | 2480156 | 97.66  | 771624 |
| 2 | 2.087 | 59489   | 2.34   | 17408  |

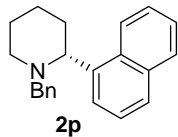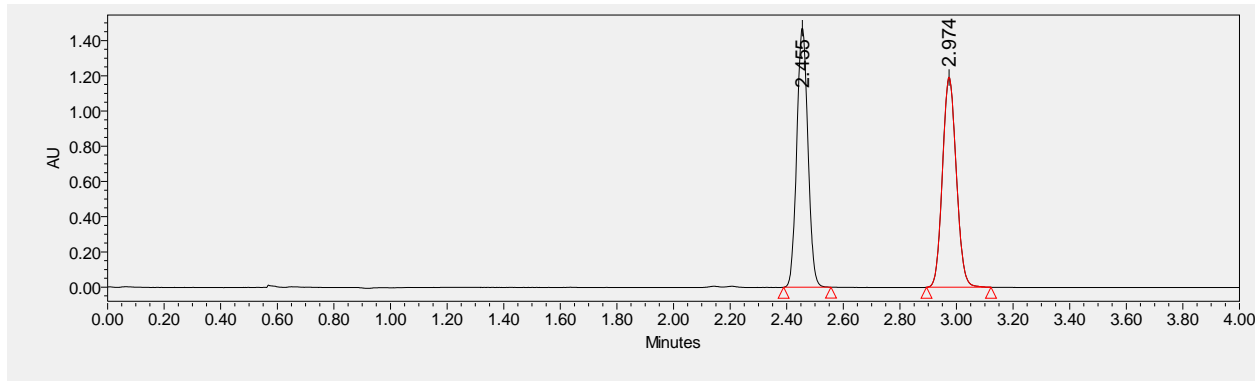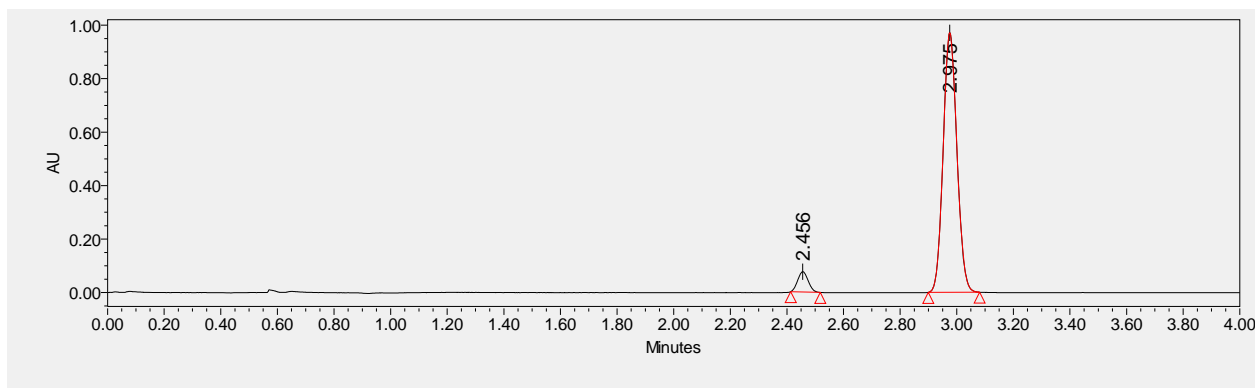

|   | RT    | Area    | % Area | Height |
|---|-------|---------|--------|--------|
| 1 | 2.456 | 203030  | 5.82   | 77365  |
| 2 | 2.975 | 3282748 | 94.18  | 971211 |



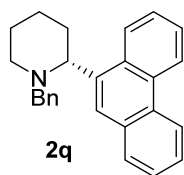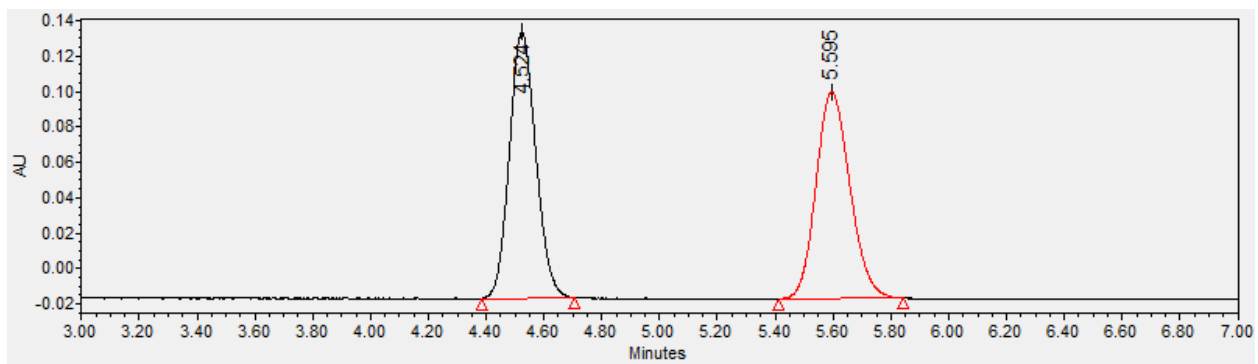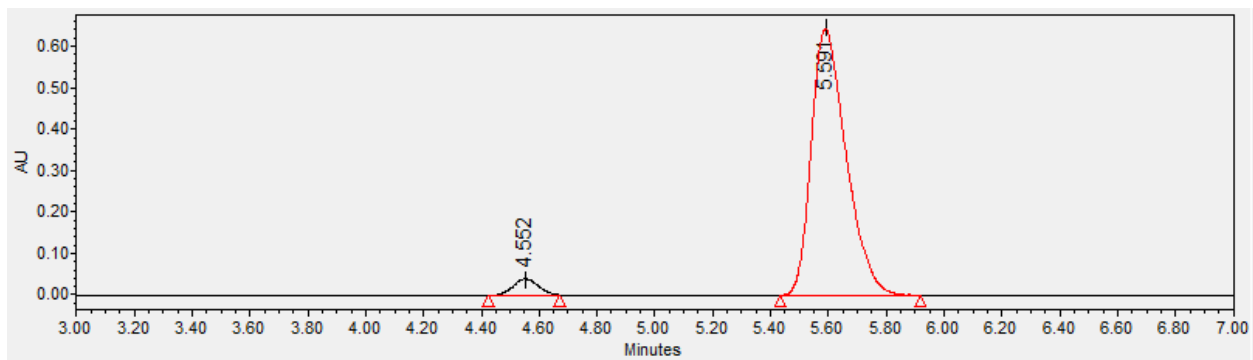

|   | RT    | Area    | % Area | Height |
|---|-------|---------|--------|--------|
| 1 | 4.552 | 319546  | 4.42   | 50819  |
| 2 | 5.590 | 6913569 | 95.58  | 823284 |

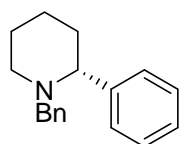

**2r**

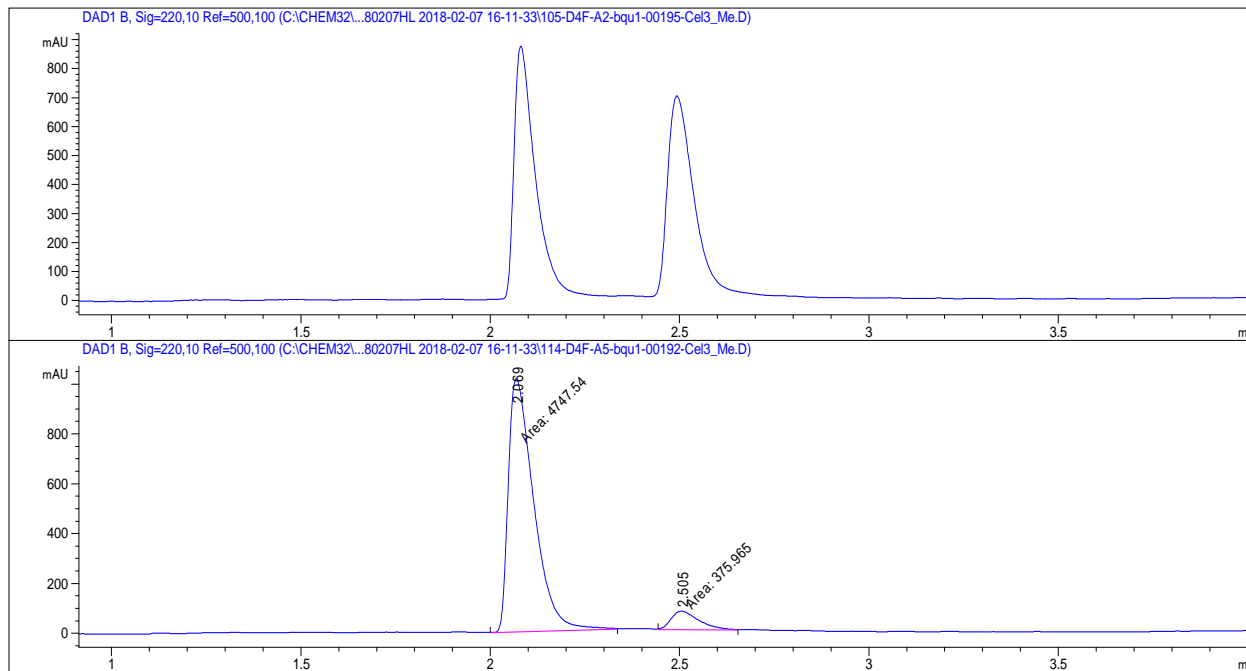

| Peak # | RetTime [min] | Type | Width [min] | Area [mAU*s] | Height [mAU] | Area %  |
|--------|---------------|------|-------------|--------------|--------------|---------|
| 1      | 2.069         | MM   | 0.0779      | 4747.54297   | 1015.71893   | 92.6620 |
| 2      | 2.505         | MM   | 0.0845      | 375.96524    | 74.12060     | 7.3380  |

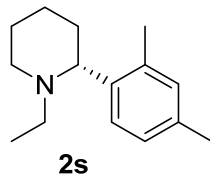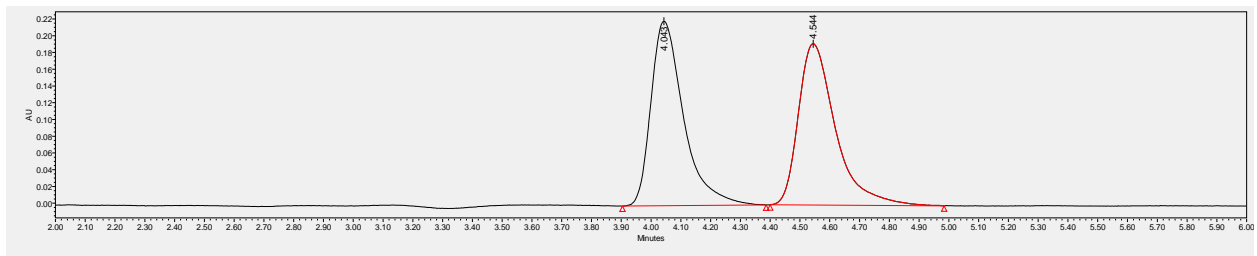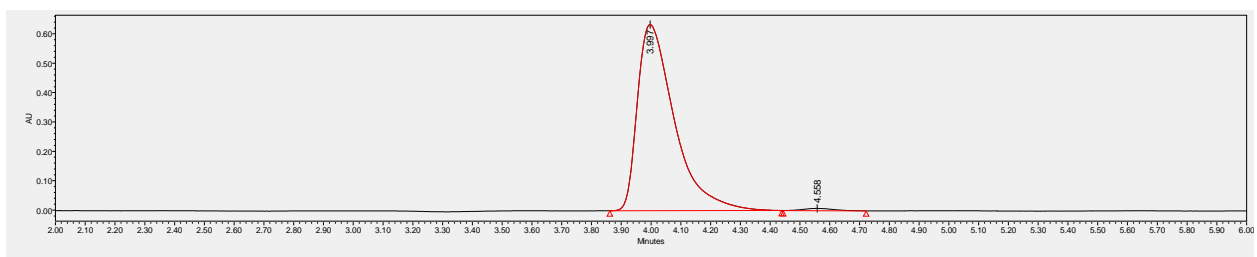

|   | RT    | Area    | % Area | Height |
|---|-------|---------|--------|--------|
| 1 | 3.997 | 5454632 | 99.01  | 633510 |
| 2 | 4.558 | 54288   | 0.99   | 7757   |

## Proposed Generation of the Ir-H Species<sup>1</sup>

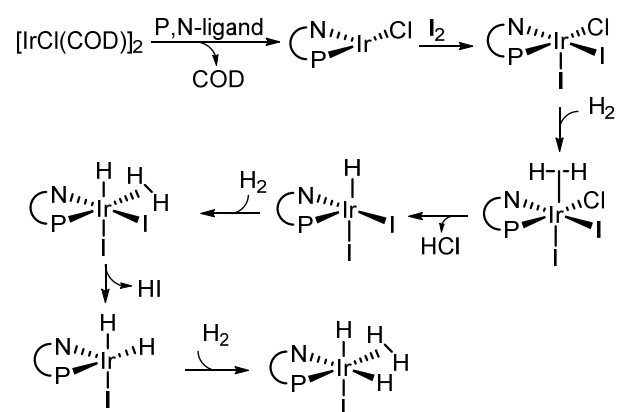

<sup>1</sup> Saidi O., Williams J.M.J. (2011) Iridium-Catalyzed Hydrogen Transfer Reactions. In: Andersson P. (eds) Iridium Catalysis. Topics in Organometallic Chemistry, vol 34. Springer, Berlin, Heidelberg

## Details of Computational Studies

Optimizations of intermediates and transition states were performed using Gaussian 09<sup>1</sup> software with spin-restricted DFT using PBE<sup>2</sup> functional and split basis set (6-31G(d) for C, P, N, O, H and LANL2DZ for Ir and I) in the gas phase. For all species, vibrational frequencies were also computed at the specified level of theory to obtain thermal Gibbs Free Energy corrections (at 298 K) and to characterize the stationary points as transition states (one and only one imaginary frequency) or minima (zero imaginary frequencies). Single point energy calculations were performed on optimized geometries in THF solvent using the PCM<sup>3</sup>-solvation model, PBE functional including Grimme dispersion correction D2<sup>4</sup>, and split basis set (6-311+G(d,p) for C, P, N, O, H; LANL2DZ for I and LANL2DZ (f) for Ir).<sup>5</sup> Obtained single-point energies were converted to the enthalpies and Gibbs free energies using corrections from gas-phase frequency analysis. Extensive conformational analysis of the transition states and intermediates was performed manually.

Example of the input file specifying basis set used in single-point:

```
# rpbepbe/gen pseudo=read extrabasis scrf=(iefpcm,solvent=TetraHydroFuran) empiricaldispersion=GD2
```

Title Card Required

0 1

COORDINATES

C H P O N O

6-311G(d,p)

\*\*\*\*

Ir I O

Lanl2dz

\*\*\*\*

Ir O

F 1 1.0

0.938 1.0

\*\*\*\*

Ir I O

Lanl2dz

## S2. Coordinates and thermochemical data for computed intermediates and transition states

---

<sup>1</sup> Gaussian 09, Revision D.01, M. J. Frisch, G. W. Trucks, H. B. Schlegel, G. E. Scuseria, M. A. Robb, J. R. Cheeseman, G. Scalmani, V. Barone, B. Mennucci, G. A. Petersson, H. Nakatsuji, M. Caricato, X. Li, H. P. Hratchian, A. F. Izmaylov, J. Bloino, G. Zheng, J. L. Sonnenberg, M. Hada, M. Ehara, K. Toyota, R. Fukuda, J. Hasegawa, M. Ishida, T. Nakajima, Y. Honda, O. Kitao, H. Nakai, T. Vreven, J. A. Montgomery, Jr., J. E. Peralta, F. Ogliaro, M. Bearpark, J. J. Heyd, E. Brothers, K. N. Kudin, V. N. Staroverov, T. Keith, R. Kobayashi, J. Normand, K. Raghavachari, A. Rendell, J. C. Burant, S. S. Iyengar, J. Tomasi, M. Cossi, N. Rega, J. M. Millam, M. Klene, J. E. Knox, J. B. Cross, V. Bakken, C. Adamo, J. Jaramillo, R. Gomperts, R. E. Stratmann, O. Yazyev, A. J. Austin, R. Cammi, C. Pomelli, J. W. Ochterski, R. L. Martin, K. Morokuma, V. G. Zakrzewski, G. A. Voth, P. Salvador, J. J. Dannenberg, S. Dapprich, A. D. Daniels, O. Farkas, J. B. Foresman, J. V. Ortiz, J. Cioslowski, and D. J. Fox, Gaussian, Inc., Wallingford CT, 2013.

<sup>2</sup> Perdew, J. P., Burke, K., Ernzerhof, M. *Phys. Rev. Lett.*, **1996**, *77*, 3865; <sup>2</sup> Perdew, J. P., Burke, K., Ernzerhof, M. *Phys. Rev. Lett.*, **1997**, *78*, 1396;

<sup>3</sup> Tomasi, J., Mennucci, B., Cammi, R. *Chem. Rev.*, **2005**, *105*, 2999.

<sup>4</sup> Grimme, S. *J. Comp. Chem.*, **2006**, *27*, 1787.

<sup>5</sup> Hopmann, K. H. *Organometallics*, **2016**, *35*, 3795.

## S2. Coordinates and thermochemical data for computed intermediates and transition states

### Conformational analysis of Ir complexes.

Multiple isomers were considered for the starting Ir-H<sub>2</sub> complex. Out of the analyzed isomers, lowest energy one was chosen for further computational study of the mechanism.

#### Starting IrIrH<sub>2</sub>(H)<sub>2</sub> complexes

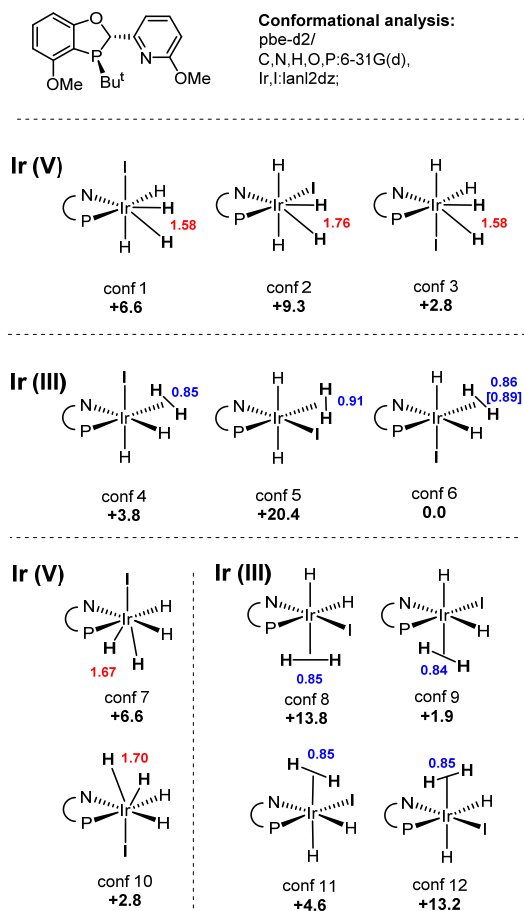

Similar analysis was performed for post-protonation Ir intermediates:

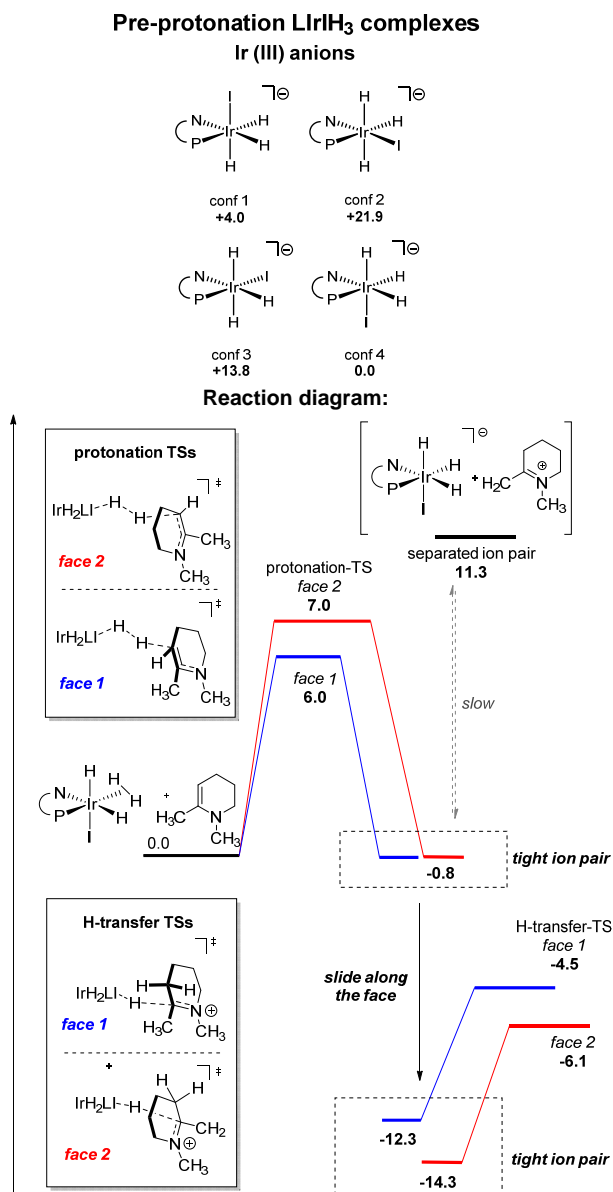

## Starting Ir(III)-complex

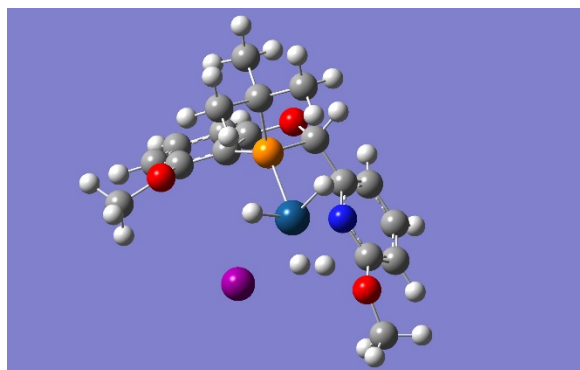

Zero-point correction= 0.396543  
 (Hartree/Particle)  
 Thermal correction to Energy= 0.425064  
 Thermal correction to Enthalpy= 0.426009  
 Thermal correction to Gibbs Free Energy= 0.336782  
 Sum of electronic and zero-point Energies= -  
 1437.703797  
 Sum of electronic and thermal Energies= -  
 1437.675276  
 Sum of electronic and thermal Enthalpies= -  
 1437.674332  
 Sum of electronic and thermal Free Energies= -  
 1437.763559  
 Electronic energy -1438.50247257

|   |             |             |             |
|---|-------------|-------------|-------------|
| C | -3.32377400 | 1.40751500  | 2.22031700  |
| C | -2.72620600 | 1.08262300  | 0.98590800  |
| C | -2.08573700 | -0.16534700 | 0.84108500  |
| C | -2.07550500 | -1.07076800 | 1.91608900  |
| C | -2.69170400 | -0.78090500 | 3.13895600  |
| C | -3.30413000 | 0.47298900  | 3.26779700  |
| H | -3.80509000 | 2.37655000  | 2.36690600  |
| H | -2.66666100 | -1.50312800 | 3.95819500  |
| H | -3.77815300 | 0.73739800  | 4.21867600  |
| O | -2.74037500 | 1.87498900  | -0.11870200 |
| C | -3.00967900 | 3.26793400  | 0.06623600  |
| H | -2.30732100 | 3.69950200  | 0.80049600  |
| H | -2.84045100 | 3.73136500  | -0.91538500 |
| H | -4.05630400 | 3.44113300  | 0.38101700  |
| O | -1.44465800 | -2.28544700 | 1.72108000  |
| C | -0.57562100 | -2.23629700 | 0.56762300  |
| P | -1.13850400 | -0.82694200 | -0.55956800 |
| C | -2.40075500 | -1.55791500 | -1.78001400 |
| C | -2.90674000 | -0.39813400 | -2.66163500 |
| H | -3.66111500 | -0.78497800 | -3.37183400 |
| H | -3.37181400 | 0.40033900  | -2.06050800 |
| H | -2.07964500 | 0.04690300  | -3.23881600 |
| C | -3.57049600 | -2.19272100 | -1.00351500 |
| H | -4.28333800 | -2.63140700 | -1.72563200 |
| H | -3.23850300 | -3.00114600 | -0.32851800 |
| H | -4.11310700 | -1.44753900 | -0.39960600 |
| C | -1.71054900 | -2.61633000 | -2.65863300 |
| H | -0.85960800 | -2.18962900 | -3.21333900 |
| H | -1.34442400 | -3.47843900 | -2.07263900 |
| H | -2.44274000 | -3.00493800 | -3.39043400 |
| C | 0.86745100  | -2.03220000 | 1.01648300  |
| C | 1.31872700  | -2.69642000 | 2.16245200  |

|    |             |             |             |
|----|-------------|-------------|-------------|
| C  | 2.64276900  | -2.51295300 | 2.57245500  |
| H  | 0.62328600  | -3.32464400 | 2.72243700  |
| C  | 2.95650900  | -1.05259600 | 0.68091900  |
| C  | 3.48033300  | -1.68625800 | 1.82297400  |
| H  | 3.02371300  | -3.01272800 | 3.46832200  |
| N  | 1.66464100  | -1.20618500 | 0.28677600  |
| Ir | 0.76283000  | 0.05538800  | -1.32026000 |
| O  | 3.67714800  | -0.24409700 | -0.12303100 |
| C  | 4.93878100  | 0.23763100  | 0.35333200  |
| H  | 5.68121600  | -0.57800200 | 0.42999800  |
| H  | 4.81900900  | 0.74176100  | 1.32790900  |
| H  | 5.27169300  | 0.96618700  | -0.39809300 |
| H  | 0.77888500  | -1.10512500 | -2.43696400 |
| I  | 0.98568500  | 2.28989100  | 0.44094500  |
| H  | -0.04857100 | 0.94883400  | -2.37245900 |
| H  | 4.51909700  | -1.52790300 | 2.11688900  |
| H  | -0.67253000 | -3.21161100 | 0.05851100  |
| H  | 1.96571100  | 0.95751300  | -2.28038800 |
| H  | 2.45368600  | 0.38937500  | -1.85648400 |

## Starting enamine

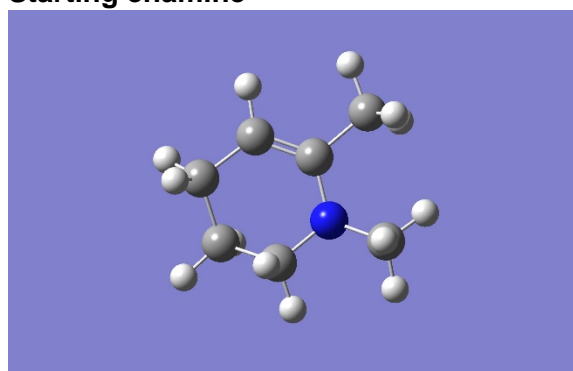

Zero-point correction= 0.186832  
 (Hartree/Particle)  
 Thermal correction to Energy= 0.195270  
 Thermal correction to Enthalpy= 0.196214  
 Thermal correction to Gibbs Free Energy= 0.154477  
 Sum of electronic and zero-point Energies= -  
 328.668570  
 Sum of electronic and thermal Energies= -  
 328.660132  
 Sum of electronic and thermal Enthalpies= -  
 328.659188  
 Sum of electronic and thermal Free Energies= -  
 328.700925  
 Electronic energy -328.95956467

|   |             |             |             |
|---|-------------|-------------|-------------|
| C | -1.95618900 | 0.79054300  | 0.21618800  |
| C | -1.89591100 | -0.62419900 | -0.38054400 |
| H | -2.34868400 | 0.75115500  | 1.25435700  |
| C | -0.66765300 | -1.36998500 | 0.14663100  |
| H | -1.82153900 | -0.55968100 | -1.48116900 |
| H | -0.61891600 | -2.38859700 | -0.28120000 |
| C | 1.88630100  | 1.43595400  | -0.14656400 |
| H | 2.58514500  | 1.17090800  | 0.66838600  |
| H | 1.72934900  | 2.52476300  | -0.11116500 |
| H | -0.74769200 | -1.48520700 | 1.25362900  |
| H | -2.80689900 | -1.20174800 | -0.14394200 |
| H | -2.68341700 | 1.40477200  | -0.34945200 |
| N | 0.57064800  | -0.67540200 | -0.21089000 |
| C | 1.76219300  | -1.42650000 | 0.15656500  |

|   |             |             |             |
|---|-------------|-------------|-------------|
| H | 1.90828100  | -1.51571500 | 1.25829300  |
| H | 2.66465600  | -0.96761200 | -0.27405000 |
| H | 2.39329300  | 1.19788100  | -1.10037100 |
| H | 1.67815200  | -2.44795200 | -0.25367300 |
| C | 0.55967000  | 0.72472300  | -0.03109700 |
| C | -0.58975000 | 1.42449600  | 0.17162800  |
| H | -0.51823300 | 2.51465400  | 0.23974500  |

### Protonation TS\_face2

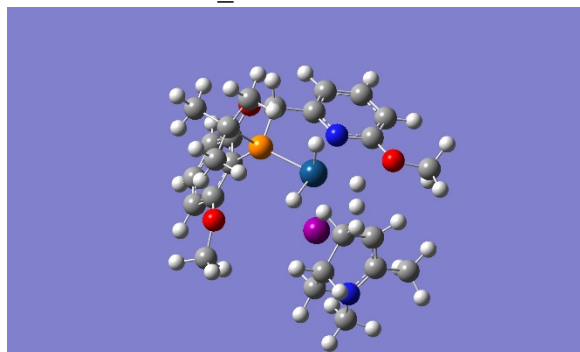

Zero-point correction= 0.583568  
(Hartree/Particle)  
Thermal correction to Energy= 0.621617  
Thermal correction to Enthalpy= 0.622561  
Thermal correction to Gibbs Free Energy= 0.511987  
Sum of electronic and zero-point Energies= -  
1766.367063  
Sum of electronic and thermal Energies= -  
1766.329015  
Sum of electronic and thermal Enthalpies= -  
1766.328070  
Sum of electronic and thermal Free Energies= -  
1766.438644  
Electronic energy -1767.47146025

|   |             |             |             |
|---|-------------|-------------|-------------|
| C | 4.03919700  | -0.00758600 | 1.37482400  |
| H | 2.51385200  | 0.51929900  | 1.08465300  |
| C | -3.12509600 | -2.43844100 | -2.50985100 |
| C | -2.36709200 | -2.20373000 | -1.34574800 |
| C | -2.66221600 | -1.08462100 | -0.54201800 |
| C | -3.71104600 | -0.22629300 | -0.91156000 |
| C | -4.49654900 | -0.45560700 | -2.04879600 |
| C | -4.17825400 | -1.56896100 | -2.83711300 |
| H | -2.90396700 | -3.29009500 | -3.15678100 |
| H | -5.30537200 | 0.23038500  | -2.31146200 |
| H | -4.76230000 | -1.76453300 | -3.74249300 |
| O | -1.36067200 | -3.01068000 | -0.90157500 |
| C | -0.75587500 | -3.89047800 | -1.84908000 |
| H | -0.41128300 | -3.32638500 | -2.73383600 |
| H | 0.11176600  | -4.32607000 | -1.33283600 |
| H | -1.44465500 | -4.70163200 | -2.15456600 |
| O | -3.96009100 | 0.86296300  | -0.10012900 |
| C | -2.84879000 | 1.11299000  | 0.79433300  |
| P | -1.78163000 | -0.44430500 | 0.92041900  |
| C | -2.46830000 | -1.42348200 | 2.40606000  |
| C | -1.64719900 | -2.72502300 | 2.50170700  |
| H | -2.01492300 | -3.32912500 | 3.35259200  |
| H | -1.73340500 | -3.32912300 | 1.58325100  |
| H | -0.57975400 | -2.50124400 | 2.66458800  |
| C | -3.96108300 | -1.74457800 | 2.20305200  |
| H | -4.34015800 | -2.28111700 | 3.09289700  |

|    |             |             |             |
|----|-------------|-------------|-------------|
| H  | -4.57353200 | -0.83417900 | 2.07582300  |
| H  | -4.12507200 | -2.38795500 | 1.32317400  |
| C  | -2.27681000 | -0.59739100 | 3.69132800  |
| H  | -1.22118700 | -0.31686500 | 3.83846600  |
| H  | -2.88180600 | 0.32742200  | 3.69217700  |
| H  | -2.60250800 | -1.20124000 | 4.55893500  |
| C  | -2.03407600 | 2.29971300  | 0.29063600  |
| C  | -2.71659400 | 3.40242600  | -0.23758600 |
| C  | -1.98157600 | 4.50620900  | -0.67733400 |
| H  | -3.80548400 | 3.36830800  | -0.31072400 |
| C  | 0.02487400  | 3.33999200  | -0.02246800 |
| C  | -0.59104000 | 4.48506600  | -0.56206700 |
| H  | -2.48438600 | 5.38081000  | -1.10166200 |
| N  | -0.67640900 | 2.24795700  | 0.38391600  |
| Ir | 0.31730400  | 0.30521500  | 0.92879100  |
| O  | 1.35913100  | 3.21879400  | 0.14236300  |
| C  | 2.19788100  | 4.23463300  | -0.40697200 |
| H  | 2.04586100  | 5.20725200  | 0.09793800  |
| H  | 2.03124000  | 4.34555700  | -1.49364000 |
| H  | 3.22553500  | 3.88870300  | -0.22874500 |
| H  | 1.82842000  | 1.12973700  | 1.19134500  |
| H  | 0.21080600  | 0.51139000  | 2.51705300  |
| I  | 0.89939900  | -0.02190100 | -1.86032400 |
| H  | 0.91976500  | -1.13588000 | 1.26546800  |
| H  | 0.00718400  | 5.33661900  | -0.88970800 |
| H  | -3.28977900 | 1.36539900  | 1.77542000  |
| H  | 4.34866700  | 0.94634300  | 1.81903300  |
| C  | 4.45490900  | -0.21276400 | 0.05629000  |
| C  | 4.91156500  | 0.95793500  | -0.77735200 |
| H  | 4.19418100  | 1.15675900  | -1.59325900 |
| H  | 4.97815100  | 1.85782300  | -0.14670300 |
| H  | 5.90639400  | 0.78350300  | -1.22569000 |
| C  | 3.79303800  | -2.54716900 | 0.21647900  |
| H  | 2.69211600  | -2.48752000 | 0.10496200  |
| H  | 4.13347600  | -3.49172100 | -0.24400100 |
| C  | 4.19153800  | -2.49338800 | 1.69406900  |
| H  | 3.73429900  | -3.34817700 | 2.22223900  |
| H  | 5.28884100  | -2.60915000 | 1.76778400  |
| C  | 4.46232700  | -1.61905300 | -1.98031700 |
| H  | 3.46690200  | -1.43744400 | -2.43551400 |
| H  | 5.19217700  | -0.93167100 | -2.43238100 |
| H  | 4.78409600  | -2.65101100 | -2.19940500 |
| N  | 4.41109400  | -1.44405900 | -0.53300600 |
| C  | 3.75784000  | -1.15910700 | 2.32166500  |
| H  | 4.29370900  | -1.00124700 | 3.27575400  |
| H  | 2.67681600  | -1.19178200 | 2.56912600  |

### Protonation TS\_face1

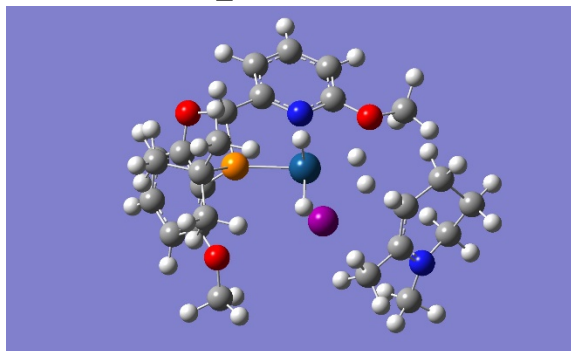

Zero-point correction= 0.582944  
(Hartree/Particle)



Thermal correction to Energy= 0.621009  
 Thermal correction to Enthalpy= 0.621953  
 Thermal correction to Gibbs Free Energy= 0.510804  
 Sum of electronic and zero-point Energies= -  
 1766.367554  
 Sum of electronic and thermal Energies= -  
 1766.329488  
 Sum of electronic and thermal Enthalpies= -  
 1766.328544  
 Sum of electronic and thermal Free Energies= -  
 1766.439693  
 Electronic energy -1767.47198523

|    |             |             |             |
|----|-------------|-------------|-------------|
| C  | 3.84043000  | -0.44106800 | 1.65363400  |
| C  | 4.68075000  | 0.80247500  | 1.41330300  |
| C  | 3.93117000  | -1.56796300 | 0.82943900  |
| C  | 5.71675300  | 0.55333400  | 0.30667400  |
| H  | 4.03009000  | 1.65987900  | 1.14125100  |
| C  | 5.09730800  | -0.24683300 | -0.84227500 |
| H  | 6.56986200  | -0.02057200 | 0.71272800  |
| H  | 5.84941600  | -0.44962200 | -1.62522700 |
| H  | 4.25896700  | 0.31003600  | -1.31400200 |
| H  | 6.12171500  | 1.50281700  | -0.08676600 |
| H  | 5.19505700  | 1.09866500  | 2.34592900  |
| N  | 4.59139200  | -1.53844200 | -0.36648200 |
| H  | 2.38143700  | 0.07720800  | 1.27845800  |
| C  | -3.68588400 | -1.91667500 | -2.47386500 |
| C  | -2.82699600 | -1.82697000 | -1.35904900 |
| C  | -2.91335800 | -0.70588400 | -0.50824000 |
| C  | -3.86876000 | 0.28976400  | -0.77669100 |
| C  | -4.75205400 | 0.20720800  | -1.86050200 |
| C  | -4.63494300 | -0.90691400 | -2.70156500 |
| H  | -3.62386200 | -2.76476500 | -3.15897800 |
| H  | -5.48188000 | 0.99965300  | -2.04290300 |
| H  | -5.29776500 | -0.99199700 | -3.56906600 |
| O  | -1.91365000 | -2.77209100 | -1.00387300 |
| C  | -1.58869100 | -3.77675300 | -1.96357800 |
| H  | -1.24738900 | -3.32044700 | -2.90970200 |
| H  | -0.76303100 | -4.35034800 | -1.51965600 |
| H  | -2.44596300 | -4.45087000 | -2.15453600 |
| O  | -3.92678500 | 1.36522800  | 0.08957700  |
| C  | -2.70392500 | 1.45538900  | 0.85838300  |
| P  | -1.89759100 | -0.25458900 | 0.94453400  |
| C  | -2.71338300 | -1.15751100 | 2.41306800  |
| C  | -2.19184500 | -2.60972700 | 2.39189300  |
| H  | -2.63024500 | -3.16619400 | 3.24184800  |
| H  | -2.46536700 | -3.13115000 | 1.45970700  |
| H  | -1.09329800 | -2.63652100 | 2.48714300  |
| C  | -4.24832500 | -1.14340500 | 2.28674800  |
| H  | -4.68736200 | -1.67127200 | 3.15382800  |
| H  | -4.65712500 | -0.11821800 | 2.27471600  |
| H  | -4.58764100 | -1.65460000 | 1.37085200  |
| C  | -2.28378100 | -0.47691700 | 3.72475900  |
| H  | -1.18784000 | -0.47281300 | 3.83459500  |
| H  | -2.63725700 | 0.56784000  | 3.79172400  |
| H  | -2.72278500 | -1.02945300 | 4.57665400  |
| C  | -1.76187800 | 2.45608900  | 0.19425700  |
| C  | -2.30897000 | 3.59729600  | -0.40516600 |
| C  | -1.45350400 | 4.51184500  | -1.02537700 |
| H  | -3.39180600 | 3.73557200  | -0.39512500 |
| C  | 0.39823000  | 3.10136100  | -0.39439900 |
| C  | -0.07982000 | 4.26786500  | -1.02179800 |
| H  | -1.85051200 | 5.41059400  | -1.50761300 |
| N  | -0.42553800 | 2.19550700  | 0.19770000  |
| Ir | 0.29466600  | 0.22063000  | 0.98029200  |

|   |             |             |             |
|---|-------------|-------------|-------------|
| O | 1.70626400  | 2.78031200  | -0.31762300 |
| C | 2.62448600  | 3.51384300  | -1.12774200 |
| H | 2.69953600  | 4.57116200  | -0.81046200 |
| H | 2.34112100  | 3.45605800  | -2.19373000 |
| H | 3.59622400  | 3.02199800  | -0.98036800 |
| H | 1.84974400  | 0.89832400  | 1.23032500  |
| H | 0.12466700  | 0.65610300  | 2.51637200  |
| I | 0.98828200  | -0.55118300 | -1.69451300 |
| H | 0.67666600  | -1.23017300 | 1.53773100  |
| H | 0.61140500  | 4.96588600  | -1.49668100 |
| H | -2.98773400 | 1.81123700  | 1.86448700  |
| H | 3.52562200  | -0.64231300 | 2.68447300  |
| C | 4.37782400  | -2.53683600 | -1.40841500 |
| H | 4.22702200  | -3.53313800 | -0.96981100 |
| H | 3.49307200  | -2.27882700 | -2.02524300 |
| H | 5.27382300  | -2.57542800 | -2.05115100 |
| C | 3.21398500  | -2.83259700 | 1.21929300  |
| H | 2.35705900  | -3.00832400 | 0.54345400  |
| H | 3.87710000  | -3.71558600 | 1.18289000  |
| H | 2.81837200  | -2.73693300 | 2.24056700  |

### Tight\_ion\_pair\_face2

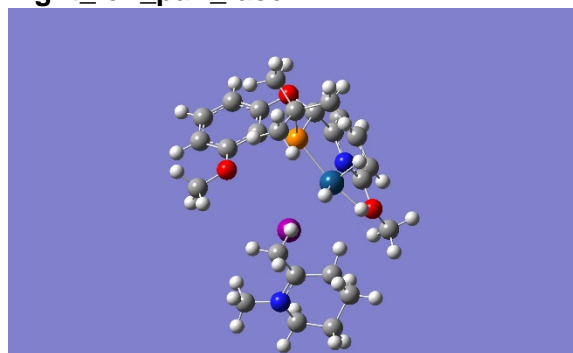

Zero-point correction= 0.587043  
 (Hartree/Particle)  
 Thermal correction to Energy= 0.625711  
 Thermal correction to Enthalpy= 0.626655  
 Thermal correction to Gibbs Free Energy= 0.512994  
 Sum of electronic and zero-point Energies= -  
 1766.372436  
 Sum of electronic and thermal Energies= -  
 1766.333767  
 Sum of electronic and thermal Enthalpies= -  
 1766.332823  
 Sum of electronic and thermal Free Energies= -  
 1766.446484  
 Electronic energy -1767.48503753

|   |             |             |             |
|---|-------------|-------------|-------------|
| C | 4.11646300  | 0.43600800  | 0.99853200  |
| H | 3.05289800  | 0.83729400  | 0.87161400  |
| C | -3.06239700 | -2.56441000 | -2.56301800 |
| C | -2.26170600 | -2.29250000 | -1.43531900 |
| C | -2.60698400 | -1.23803100 | -0.56829900 |
| C | -3.77097800 | -0.49484800 | -0.83293000 |
| C | -4.60075400 | -0.76355300 | -1.93064000 |
| C | -4.21992500 | -1.80183500 | -2.78946000 |
| H | -2.79850800 | -3.36617100 | -3.25624700 |
| H | -5.49654300 | -0.16279400 | -2.10665200 |
| H | -4.83752900 | -2.02452600 | -3.66602200 |
| O | -1.15904000 | -3.02065200 | -1.08194000 |
| C | -0.57754400 | -3.85722700 | -2.07601000 |

|    |             |             |             |
|----|-------------|-------------|-------------|
| H  | -0.32581900 | -3.27563200 | -2.98154800 |
| H  | 0.34674700  | -4.25013000 | -1.62748500 |
| H  | -1.23936200 | -4.70417800 | -2.34366800 |
| O  | -4.09357500 | 0.51504200  | 0.04941600  |
| C  | -2.93930700 | 0.86639100  | 0.85558100  |
| P  | -1.70958600 | -0.57668300 | 0.89483100  |
| C  | -2.30269200 | -1.69321300 | 2.33450900  |
| C  | -1.38055500 | -2.92992600 | 2.33196700  |
| H  | -1.65434000 | -3.59635500 | 3.17239500  |
| H  | -1.46848500 | -3.50159800 | 1.39282700  |
| H  | -0.32635400 | -2.62693000 | 2.45153500  |
| C  | -3.77087000 | -2.12418100 | 2.17307200  |
| H  | -4.07089400 | -2.74261300 | 3.04050300  |
| H  | -4.45512700 | -1.25933200 | 2.12424400  |
| H  | -3.92233800 | -2.72423800 | 1.26057400  |
| C  | -2.11919000 | -0.92918600 | 3.65844000  |
| H  | -1.08238700 | -0.57475200 | 3.77533300  |
| H  | -2.78990400 | -0.05429800 | 3.73467300  |
| H  | -2.36168000 | -1.60224600 | 4.50292700  |
| C  | -2.29041500 | 2.12169400  | 0.28069500  |
| C  | -3.12370800 | 3.12668700  | -0.22876800 |
| C  | -2.54850200 | 4.29018500  | -0.74356200 |
| H  | -4.20418300 | 2.96973700  | -0.22645500 |
| C  | -0.38367200 | 3.36779500  | -0.20526600 |
| C  | -1.15872400 | 4.42002500  | -0.72932100 |
| H  | -3.17223000 | 5.09237200  | -1.15062200 |
| N  | -0.93001400 | 2.22177300  | 0.28996000  |
| Ir | 0.29300600  | 0.50584700  | 1.00448900  |
| O  | 0.96431100  | 3.39918900  | -0.14620800 |
| C  | 1.63159700  | 4.50552600  | -0.74522200 |
| H  | 1.39522500  | 5.45679800  | -0.23071900 |
| H  | 1.38554700  | 4.59496500  | -1.81975200 |
| H  | 2.70411500  | 4.29136200  | -0.63399200 |
| H  | 1.60602100  | 1.44449000  | 1.34863000  |
| H  | 0.01710800  | 0.84726100  | 2.53907100  |
| I  | 1.19765700  | 0.02907700  | -1.71956800 |
| H  | 1.14420500  | -0.72844100 | 1.57810700  |
| H  | -0.68144600 | 5.31921900  | -1.12197000 |
| H  | -3.31864400 | 1.08035300  | 1.87051600  |
| H  | 4.75364100  | 1.33372000  | 1.07286200  |
| C  | 4.39772600  | -0.24497500 | -0.28230700 |
| C  | 4.92123700  | 0.56641800  | -1.43568500 |
| H  | 4.40359400  | 0.33785300  | -2.37758500 |
| H  | 4.78003100  | 1.63615400  | -1.22576800 |
| H  | 6.00722300  | 0.38185300  | -1.56516300 |
| C  | 3.71127300  | -2.33650200 | 0.73398100  |
| H  | 2.61795000  | -2.16776500 | 0.77508400  |
| H  | 3.90380700  | -3.39972000 | 0.52040400  |
| C  | 4.39301400  | -1.89090700 | 2.02791700  |
| H  | 4.02525300  | -2.51537200 | 2.85969000  |
| H  | 5.47972800  | -2.07630500 | 1.93374000  |
| C  | 4.26471800  | -2.21179100 | -1.71329900 |
| H  | 3.30655300  | -1.97430200 | -2.22408200 |
| H  | 5.11092500  | -1.85651200 | -2.31890600 |
| H  | 4.35943600  | -3.29726200 | -1.56940500 |
| N  | 4.24668800  | -1.55698600 | -0.40459200 |
| C  | 4.10676000  | -0.40757400 | 2.29491100  |
| H  | 4.84536700  | -0.00505600 | 3.00884700  |
| H  | 3.10747400  | -0.30054600 | 2.75073600  |

## Tight\_ion\_pair\_face1

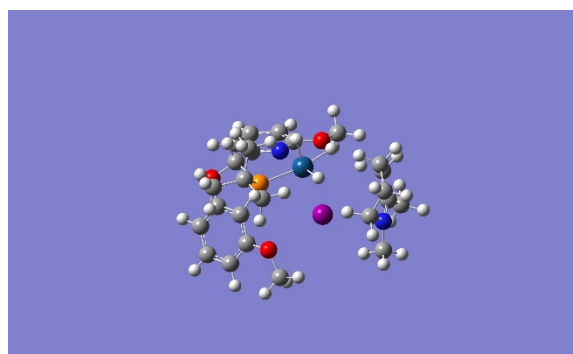

|                                              |                |
|----------------------------------------------|----------------|
| Zero-point correction=                       | 0.588640       |
| (Hartree/Particle)                           |                |
| Thermal correction to Energy=                | 0.626646       |
| Thermal correction to Enthalpy=              | 0.627590       |
| Thermal correction to Gibbs Free Energy=     | 0.516710       |
| Sum of electronic and zero-point Energies=   | -              |
| 1766.376683                                  |                |
| Sum of electronic and thermal Energies=      | -              |
| 1766.338676                                  |                |
| Sum of electronic and thermal Enthalpies=    | -              |
| 1766.337732                                  |                |
| Sum of electronic and thermal Free Energies= | -              |
| 1766.448612                                  |                |
| Electronic energy                            | -1767.48875168 |

|   |             |             |             |
|---|-------------|-------------|-------------|
| C | 3.84547900  | -0.18666200 | 1.44753900  |
| C | 4.66520200  | 0.91232100  | 0.76904900  |
| C | 3.61220100  | -1.41904400 | 0.61278800  |
| C | 5.85175200  | 0.30300400  | 0.01711800  |
| H | 4.00510200  | 1.44754300  | 0.06217900  |
| C | 5.35707600  | -0.75646300 | -0.96553100 |
| H | 6.56253900  | -0.16147700 | 0.72684000  |
| H | 6.20223900  | -1.27629700 | -1.44675600 |
| H | 4.73725000  | -0.28794000 | -1.76062300 |
| H | 6.41153400  | 1.06905400  | -0.54828900 |
| H | 5.00501400  | 1.64391800  | 1.52199700  |
| N | 4.52261200  | -1.78509900 | -0.31327700 |
| H | 2.85364000  | 0.19704900  | 1.75984200  |
| C | -2.67689100 | -3.01945200 | -2.39193400 |
| C | -2.10703100 | -2.51403600 | -1.20590000 |
| C | -2.54474300 | -1.27929500 | -0.68555500 |
| C | -3.56436800 | -0.58543800 | -1.36120800 |
| C | -4.16088300 | -1.07444700 | -2.53299200 |
| C | -3.69556600 | -2.29514800 | -3.03381900 |
| H | -2.34238100 | -3.96837600 | -2.81672100 |
| H | -4.95034800 | -0.50521400 | -3.02997300 |
| H | -4.13193400 | -2.69834200 | -3.95377300 |
| O | -1.14754600 | -3.16485400 | -0.47599700 |
| C | -0.60232500 | -4.35826100 | -1.02344900 |
| H | -0.13205500 | -4.17341000 | -2.00790600 |
| H | 0.16450100  | -4.69007000 | -0.30751400 |
| H | -1.36840100 | -5.15127400 | -1.12736000 |
| O | -3.99729600 | 0.60286200  | -0.81489600 |
| C | -3.04852500 | 1.08653700  | 0.17219300  |
| P | -1.95673800 | -0.33821000 | 0.78570800  |
| C | -2.95148700 | -1.10882600 | 2.23248100  |
| C | -2.14635700 | -2.33887000 | 2.69909800  |
| H | -2.65080300 | -2.80599700 | 3.56676100  |
| H | -2.05965300 | -3.09610600 | 1.90177700  |

|    |             |             |             |
|----|-------------|-------------|-------------|
| H  | -1.12777700 | -2.04375200 | 3.00335500  |
| C  | -4.37168300 | -1.52770800 | 1.81629900  |
| H  | -4.90388500 | -1.94713900 | 2.69141900  |
| H  | -4.96488400 | -0.67526500 | 1.44124600  |
| H  | -4.35492700 | -2.29910200 | 1.02842700  |
| C  | -3.01642900 | -0.08362000 | 3.37955200  |
| H  | -2.00894300 | 0.24961400  | 3.67683700  |
| H  | -3.60668000 | 0.81116800  | 3.11005100  |
| H  | -3.50842000 | -0.54861200 | 4.25509200  |
| C  | -2.21379500 | 2.20603800  | -0.44186300 |
| C  | -2.84820400 | 3.11476700  | -1.30006900 |
| C  | -2.10536400 | 4.15873500  | -1.85486400 |
| H  | -3.90699600 | 2.97621200  | -1.52782700 |
| C  | -0.17900800 | 3.32114700  | -0.66557900 |
| C  | -0.75159900 | 4.27156700  | -1.53230800 |
| H  | -2.57221000 | 4.88248800  | -2.53051200 |
| N  | -0.88890500 | 2.28947600  | -0.12598400 |
| Ir | 0.03903500  | 0.72767800  | 1.15641600  |
| O  | 1.11826000  | 3.34077300  | -0.29546200 |
| C  | 1.96595200  | 4.32586200  | -0.87854900 |
| H  | 1.65187700  | 5.35178200  | -0.60712700 |
| H  | 2.00144400  | 4.22877200  | -1.97995900 |
| H  | 2.96381600  | 4.12989000  | -0.46132600 |
| H  | 1.31653400  | 1.65647300  | 1.58172300  |
| H  | -0.54325100 | 1.38795100  | 2.48084300  |
| I  | 1.52982900  | -0.31020200 | -1.09284600 |
| H  | 0.65627100  | -0.33810100 | 2.19014900  |
| H  | -0.14726000 | 5.07899900  | -1.94909500 |
| H  | -3.64590800 | 1.49561700  | 1.00634900  |
| H  | 4.35395200  | -0.53995300 | 2.37218000  |
| C  | 4.28855100  | -2.98023400 | -1.12430800 |
| H  | 4.15474800  | -3.86647400 | -0.48725300 |
| H  | 3.38267800  | -2.83260000 | -1.74742000 |
| H  | 5.15848500  | -3.14553400 | -1.77626200 |
| C  | 2.71795900  | -2.45696100 | 1.23552100  |
| H  | 1.86538000  | -1.94279600 | 1.70891500  |
| H  | 2.31705800  | -3.18218300 | 0.51491500  |
| H  | 3.28430100  | -3.00177400 | 2.01937800  |

|                                              |                |
|----------------------------------------------|----------------|
| Sum of electronic and thermal Enthalpies=    | -              |
| 1437.151189                                  |                |
| Sum of electronic and thermal Free Energies= | -              |
| 1437.240353                                  |                |
| Electronic energy                            | -1438.02310071 |

|    |             |             |             |
|----|-------------|-------------|-------------|
| H  | 2.38998400  | 0.64905800  | -1.78625500 |
| Ir | 0.93560200  | 0.12178600  | -1.26163800 |
| I  | 0.78149400  | 2.42153500  | 0.52195300  |
| C  | -3.57725600 | 1.24297400  | 2.02546700  |
| C  | -2.90450300 | 0.93084500  | 0.82502500  |
| C  | -2.18518700 | -0.27371300 | 0.71566100  |
| C  | -2.16005000 | -1.14986600 | 1.81317300  |
| C  | -2.84958700 | -0.88205800 | 3.00531200  |
| C  | -3.54793700 | 0.33030300  | 3.09142900  |
| H  | -4.12060400 | 2.18556400  | 2.12922200  |
| H  | -2.80480300 | -1.58689200 | 3.84017500  |
| H  | -4.07526800 | 0.57964200  | 4.01940700  |
| O  | -2.93951300 | 1.71380200  | -0.29656700 |
| C  | -3.10859000 | 3.11746200  | -0.11110200 |
| H  | -4.12980800 | 3.37054300  | 0.24077300  |
| H  | -2.34548800 | 3.50364600  | 0.58824900  |
| H  | -2.94630100 | 3.56626500  | -1.10193800 |
| O  | -1.42262100 | -2.30769000 | 1.68576100  |
| C  | -0.50745000 | -2.21056400 | 0.55798500  |
| P  | -1.03477700 | -0.81621200 | -0.62207100 |
| C  | -2.21038900 | -1.70259600 | -1.86027200 |
| C  | -1.37811900 | -2.70067000 | -2.68534700 |
| H  | -1.99582100 | -3.10361000 | -3.51216800 |
| H  | -0.48562900 | -2.21136800 | -3.11036100 |
| H  | -1.03877600 | -3.56153900 | -2.07976700 |
| C  | -2.74341600 | -0.59883600 | -2.79651000 |
| H  | -3.38861300 | -1.04949700 | -3.57730700 |
| H  | -3.33522800 | 0.15142500  | -2.24534100 |
| H  | -1.90684400 | -0.07212000 | -3.28666900 |
| C  | -3.37734300 | -2.42798400 | -1.17147000 |
| H  | -4.00432200 | -2.93860400 | -1.92965500 |
| H  | -3.02732000 | -3.19404800 | -0.45613700 |
| H  | -4.02097200 | -1.72424700 | -0.61727300 |
| C  | 0.91712300  | -1.99966200 | 1.06177600  |
| C  | 1.32134600  | -2.68662500 | 2.21290400  |
| C  | 2.64794100  | -2.59388700 | 2.64894500  |
| H  | 0.57936600  | -3.28052700 | 2.75265300  |
| C  | 3.06445600  | -1.16793200 | 0.73693100  |
| C  | 3.53349500  | -1.83732700 | 1.87986300  |
| H  | 2.98552700  | -3.11735200 | 3.54993000  |
| N  | 1.75967000  | -1.19143500 | 0.33916800  |
| O  | 3.97231000  | -0.53703500 | -0.05308700 |
| C  | 4.33246900  | 0.80095800  | 0.34128700  |
| H  | 4.80547300  | 0.79640400  | 1.34514400  |
| H  | 3.44720700  | 1.46063400  | 0.33534700  |
| H  | 5.06183000  | 1.14238100  | -0.40859900 |
| H  | 4.59558700  | -1.75388800 | 2.12722400  |
| H  | -0.55307300 | -3.18873100 | 0.04429100  |
| H  | 1.18438400  | -0.93938100 | -2.43765500 |
| H  | 0.38945800  | 1.08303200  | -2.41891800 |

### Separated\_ion\_pair: catalyst

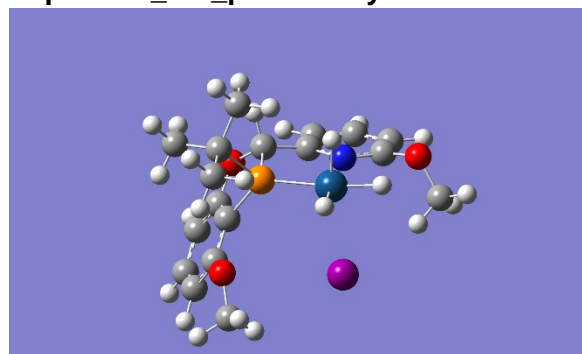

|                                            |          |
|--------------------------------------------|----------|
| Zero-point correction=                     | 0.385723 |
| (Hartree/Particle)                         |          |
| Thermal correction to Energy=              | 0.413947 |
| Thermal correction to Enthalpy=            | 0.414891 |
| Thermal correction to Gibbs Free Energy=   | 0.325728 |
| Sum of electronic and zero-point Energies= | -        |
| 1437.180357                                |          |
| Sum of electronic and thermal Energies=    | -        |
| 1437.152133                                |          |

### Separated\_ion\_pair: iminium

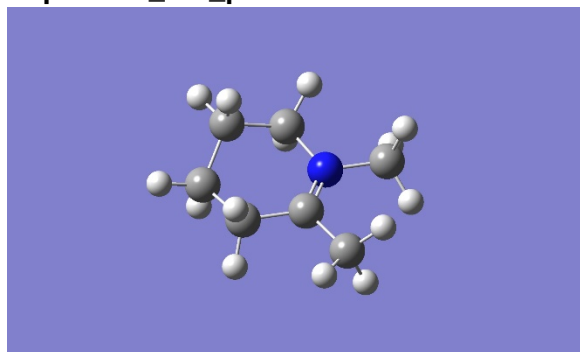

Zero-point correction= 0.199954  
(Hartree/Particle)  
Thermal correction to Energy= 0.208728  
Thermal correction to Enthalpy= 0.209672  
Thermal correction to Gibbs Free Energy= 0.166975  
Sum of electronic and zero-point Energies= -  
329.059334  
Sum of electronic and thermal Energies= -  
329.050560  
Sum of electronic and thermal Enthalpies= -  
329.049616  
Sum of electronic and thermal Free Energies= -  
329.092314  
Electronic energy -329.42231158

|   |             |             |             |
|---|-------------|-------------|-------------|
| C | 0.67388600  | 1.47488400  | 0.00270500  |
| C | 1.94409800  | 0.68479800  | -0.32568000 |
| C | 1.89179700  | -0.66992100 | 0.38564000  |
| H | 2.02286100  | 0.53666100  | -1.41779900 |
| C | 0.66320400  | -1.44673100 | -0.06875900 |
| H | 1.86286200  | -0.52939600 | 1.48161100  |
| H | 0.46739200  | -2.31788600 | 0.57884400  |
| C | -1.88989500 | 1.43628200  | 0.11385700  |
| H | -2.41018200 | 1.43665900  | -0.86305800 |
| H | -1.69316400 | 2.48521400  | 0.37954900  |
| H | 0.77195900  | -1.82064200 | -1.10337600 |
| H | 2.78451000  | -1.27719700 | 0.16367500  |
| H | 2.82969500  | 1.26237500  | -0.01769200 |
| N | -0.58874900 | -0.62983500 | -0.04733600 |
| C | -1.82240300 | -1.43932700 | -0.08545800 |
| H | -1.63007900 | -2.32756000 | -0.70511300 |
| H | -2.65516200 | -0.87313500 | -0.51979800 |
| H | 0.51549600  | 2.31965700  | -0.69529000 |
| H | 0.74393800  | 1.95569400  | 1.00153500  |
| H | -2.57853800 | 1.00494100  | 0.85857300  |
| H | -2.08192100 | -1.76640700 | 0.93560700  |
| C | -0.59875800 | 0.67999200  | 0.02004300  |

### Pre-H transfer tight\_ion\_pair\_face2

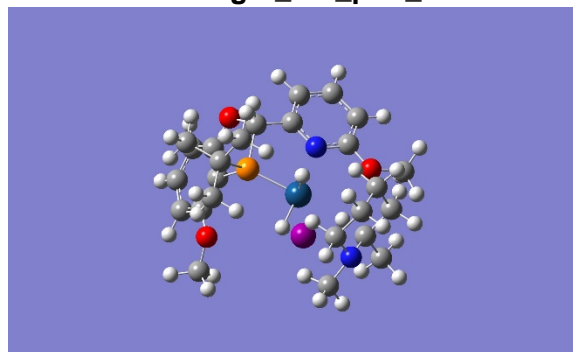

Zero-point correction= 0.590645  
(Hartree/Particle)  
Thermal correction to Energy= 0.628625  
Thermal correction to Enthalpy= 0.629569  
Thermal correction to Gibbs Free Energy= 0.518803  
Sum of electronic and zero-point Energies= -  
1766.401211  
Sum of electronic and thermal Energies= -  
1766.363232  
Sum of electronic and thermal Enthalpies= -  
1766.362287  
Sum of electronic and thermal Free Energies= -  
1766.473054  
Electronic energy -1767.51239308

|    |             |             |             |
|----|-------------|-------------|-------------|
| C  | -3.68498300 | -2.57740800 | -0.94857300 |
| C  | -3.69605400 | -0.57332600 | 0.44969800  |
| C  | -4.55869000 | -1.91853400 | -2.01963800 |
| H  | -2.60787000 | -2.47242300 | -1.22453000 |
| C  | -4.32360100 | -0.40402100 | -2.03111200 |
| H  | -5.62178500 | -2.13333100 | -1.79992100 |
| H  | -5.00058000 | 0.09715600  | -2.74727300 |
| C  | -3.95579200 | -0.00362200 | 1.84575000  |
| H  | -3.96951400 | 1.09632900  | 1.80014200  |
| H  | -3.16612900 | -0.27785400 | 2.56255600  |
| H  | -3.28728000 | -0.19450900 | -2.35974000 |
| H  | -4.32826600 | -2.36467500 | -3.00433800 |
| H  | -3.90718900 | -3.65812400 | -0.88593900 |
| H  | -2.56340900 | -0.34410200 | 0.20499900  |
| Ir | -0.52325900 | -0.20326400 | -0.22431800 |
| I  | -0.08561900 | 0.51217100  | 2.45839900  |
| C  | 4.49400200  | -0.89109700 | 1.80531700  |
| C  | 3.32097000  | -1.23124300 | 1.10366500  |
| C  | 2.95392900  | -0.47785000 | -0.03110700 |
| C  | 3.76033500  | 0.59702900  | -0.44128700 |
| C  | 4.94393500  | 0.93597500  | 0.22699600  |
| C  | 5.28631500  | 0.17715300  | 1.35328700  |
| H  | 4.79277500  | -1.44735000 | 2.69621300  |
| H  | 5.55168000  | 1.77715800  | -0.11452100 |
| H  | 6.19656700  | 0.42900400  | 1.90725500  |
| O  | 2.49648500  | -2.26650000 | 1.42124300  |
| C  | 2.61855900  | -2.83532100 | 2.72673100  |
| H  | 3.57891000  | -3.37160500 | 2.84920000  |
| H  | 2.51484100  | -2.05436500 | 3.50009500  |
| H  | 1.78741700  | -3.54884400 | 2.81422100  |
| O  | 3.35724900  | 1.31745000  | -1.54796400 |
| C  | 1.97971700  | 1.03436900  | -1.89240800 |
| P  | 1.45314300  | -0.57842100 | -1.05099200 |
| C  | 1.74507700  | -1.96514000 | -2.32588800 |
| C  | 0.84240900  | -1.73161700 | -3.55052500 |

|   |             |             |             |
|---|-------------|-------------|-------------|
| H | 0.96577700  | -2.57621400 | -4.25365200 |
| H | -0.22011300 | -1.67196200 | -3.26383000 |
| H | 1.10408100  | -0.80899600 | -4.09952400 |
| C | 1.36861300  | -3.29861100 | -1.65034500 |
| H | 1.53029200  | -4.12741000 | -2.36483800 |
| H | 1.97957800  | -3.48920800 | -0.75255200 |
| H | 0.30869900  | -3.29761000 | -1.34658400 |
| C | 3.22548300  | -1.97536500 | -2.75309500 |
| H | 3.37583700  | -2.76682300 | -3.51048000 |
| H | 3.53963400  | -1.01771900 | -3.20490500 |
| H | 3.89493600  | -2.18528500 | -1.90319400 |
| C | 1.08948400  | 2.19586900  | -1.46276000 |
| C | 1.53691600  | 3.50222600  | -1.69315600 |
| C | 0.72457400  | 4.57221500  | -1.30688500 |
| H | 2.51710000  | 3.65887500  | -2.14835900 |
| C | -0.89543500 | 2.96822700  | -0.52420500 |
| C | -0.51382800 | 4.30965500  | -0.71953300 |
| H | 1.04831800  | 5.60550700  | -1.46529200 |
| N | -0.10519400 | 1.92167500  | -0.87072800 |
| O | -2.07468900 | 2.59218500  | 0.01731400  |
| C | -2.88941900 | 3.62213900  | 0.58711700  |
| H | -3.25026600 | 4.32605900  | -0.18571800 |
| H | -2.33915600 | 4.17023000  | 1.37210300  |
| H | -3.74722900 | 3.10394200  | 1.03534900  |
| H | -1.16865200 | 5.12741100  | -0.41560700 |
| H | 1.94764000  | 0.93285300  | -2.99196700 |
| H | -1.09615100 | -0.64986600 | -1.65813400 |
| H | -0.68006900 | -1.71545300 | 0.25558300  |
| H | -4.93734000 | -0.34858700 | 2.21723300  |
| C | -3.28135700 | -2.78618900 | 1.43122900  |
| H | -3.63428700 | -2.47045100 | 2.42455300  |
| H | -3.55340600 | -3.84679700 | 1.29475700  |
| H | -2.17220500 | -2.69595500 | 1.40893000  |
| N | -3.92130700 | -1.99927600 | 0.38015000  |
| C | -4.51993600 | 0.16566800  | -0.62271500 |
| H | -4.23929200 | 1.23190400  | -0.59922800 |
| H | -5.58648500 | 0.09268600  | -0.33089300 |

Sum of electronic and thermal Free Energies= -  
1766.470894

Electronic energy -1767.51018231

|    |             |             |             |
|----|-------------|-------------|-------------|
| C  | -4.20536400 | -0.44995000 | 1.13911900  |
| C  | -3.79120200 | -1.86467600 | 1.55319300  |
| C  | -3.82966200 | -0.10066000 | -0.31240700 |
| C  | -4.29012500 | -2.88237300 | 0.52232700  |
| H  | -2.68842700 | -1.90491500 | 1.62338200  |
| C  | -3.81097200 | -2.48881900 | -0.87645200 |
| H  | -5.39658300 | -2.92011300 | 0.52614700  |
| H  | -4.22377700 | -3.18009800 | -1.63406100 |
| C  | -4.39527600 | 1.27280900  | -0.69660900 |
| H  | -3.90565800 | 1.70739600  | -1.58139400 |
| H  | -4.25297100 | 1.97430100  | 0.13904000  |
| H  | -2.69823500 | -2.56313200 | -0.92652800 |
| H  | -3.92520700 | -3.89899400 | 0.75693900  |
| H  | -4.18579900 | -2.09399100 | 2.55973200  |
| N  | -4.24288000 | -1.13250000 | -1.24050500 |
| C  | -3.96321100 | -0.84183900 | -2.64070900 |
| H  | -2.87104200 | -0.71236700 | -2.83234600 |
| H  | -4.48325200 | 0.07351600  | -2.96375000 |
| H  | -3.72451600 | 0.29120300  | 1.80207200  |
| H  | -2.65597800 | -0.00469100 | -0.33933200 |
| H  | -5.30330400 | -0.33032400 | 1.23610500  |
| Ir | -0.53731600 | -0.11066800 | -0.37194800 |
| I  | -0.41167300 | 0.41488000  | 2.39030900  |
| C  | 4.29857500  | -1.00266400 | 2.08085000  |
| C  | 3.13783300  | -1.30044700 | 1.33855200  |
| C  | 2.90157400  | -0.61710300 | 0.12646300  |
| C  | 3.83359100  | 0.33342900  | -0.32606800 |
| C  | 5.00761000  | 0.62129100  | 0.38052100  |
| C  | 5.21341400  | -0.05764500 | 1.58862400  |
| H  | 4.49414900  | -1.50105300 | 3.03263800  |
| H  | 5.71336200  | 1.36516000  | 0.00336900  |
| H  | 6.11266200  | 0.15952400  | 2.17438200  |
| O  | 2.21163000  | -2.23354900 | 1.68329700  |
| C  | 2.23292100  | -2.73765300 | 3.02049000  |
| H  | 3.14021100  | -3.34198200 | 3.21154200  |
| H  | 2.16209300  | -1.91201300 | 3.74985300  |
| H  | 1.34108100  | -3.37344700 | 3.10605300  |
| O  | 3.56597800  | 0.97493100  | -1.52147800 |
| C  | 2.16804900  | 0.84118100  | -1.87209400 |
| P  | 1.46586000  | -0.68388400 | -0.99251700 |
| C  | 1.74953600  | -2.17204800 | -2.14521200 |
| C  | 0.90302700  | -2.00217500 | -3.41948700 |
| H  | 1.06036400  | -2.88079500 | -4.07231800 |
| H  | -0.17091500 | -1.93147300 | -3.18465400 |
| H  | 1.18715700  | -1.10621000 | -4.00006300 |
| C  | 1.29866700  | -3.43673100 | -1.38744700 |
| H  | 1.45689400  | -4.32105800 | -2.03274800 |
| H  | 1.86822600  | -3.58080700 | -0.45459300 |
| H  | 0.22876100  | -3.37895400 | -1.12742300 |
| C  | 3.24364000  | -2.27079600 | -2.51146500 |
| H  | 3.38746600  | -3.12187200 | -3.20256000 |
| H  | 3.61434600  | -1.36228300 | -3.01744100 |
| H  | 3.87321800  | -2.44570200 | -1.62391400 |
| C  | 1.41585100  | 2.09752500  | -1.43897000 |
| C  | 2.03325800  | 3.34322900  | -1.60201900 |
| C  | 1.36647300  | 4.49198800  | -1.16277700 |
| H  | 3.03234000  | 3.39075800  | -2.03996500 |
| C  | -0.45574200 | 3.08061100  | -0.45964900 |
| C  | 0.10436700  | 4.36648100  | -0.58119400 |
| H  | 1.82525500  | 5.47949900  | -1.27283500 |
| N  | 0.18657800  | 1.95857000  | -0.87056700 |

### Pre-H transfer tight\_ion\_pair\_face1

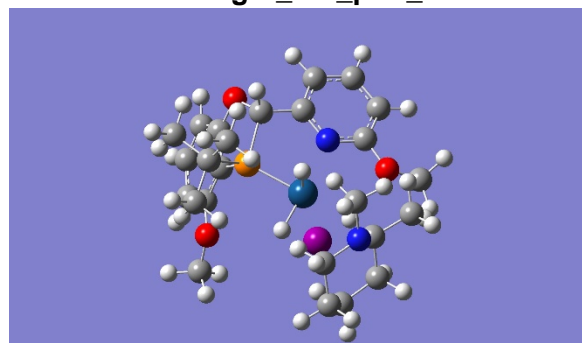

Zero-point correction= 0.591060  
(Hartree/Particle)

Thermal correction to Energy= 0.628885  
 Thermal correction to Enthalpy= 0.629829  
 Thermal correction to Gibbs Free Energy= 0.519757  
 Sum of electronic and zero-point Energies= -  
 1766.399592  
 Sum of electronic and thermal Energies= -  
 1766.361766  
 Sum of electronic and thermal Enthalpies= -  
 1766.360822



|   |             |             |             |
|---|-------------|-------------|-------------|
| O | -1.67429400 | 2.83998300  | 0.06570600  |
| C | -2.19859500 | 3.81176300  | 0.97876000  |
| H | -2.53519700 | 4.72480400  | 0.45328100  |
| H | -1.44742100 | 4.06004000  | 1.74767800  |
| H | -3.05864000 | 3.32739600  | 1.45988000  |
| H | -0.44308800 | 5.24374300  | -0.23160700 |
| H | 2.12783100  | 0.72737200  | -2.96954900 |
| H | -0.95437500 | -0.40361100 | -1.89617400 |
| H | -0.93012300 | -1.61168500 | -0.00539000 |
| H | -5.47908400 | 1.18290900  | -0.89098900 |
| H | -4.32954200 | -1.67678000 | -3.26181000 |

## H\_transfer\_TS\_face2

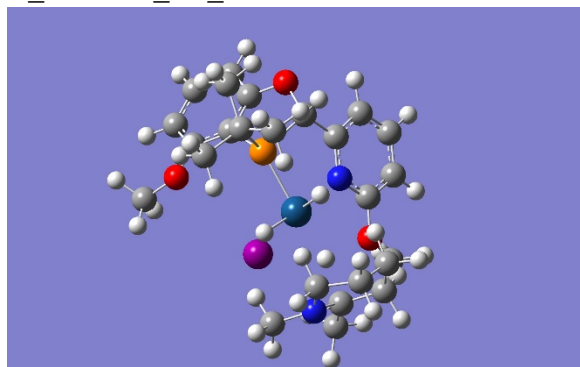

Zero-point correction= 0.586834  
 (Hartree/Particle)  
 Thermal correction to Energy= 0.624449  
 Thermal correction to Enthalpy= 0.625393  
 Thermal correction to Gibbs Free Energy= 0.515463  
 Sum of electronic and zero-point Energies= -  
 1766.387264  
 Sum of electronic and thermal Energies= -  
 1766.349649  
 Sum of electronic and thermal Enthalpies= -  
 1766.348705  
 Sum of electronic and thermal Free Energies= -  
 1766.458635  
 Electronic energy -1767.49602994

|    |             |             |             |
|----|-------------|-------------|-------------|
| C  | -3.89672400 | -2.37000000 | -1.07380600 |
| C  | -3.97672900 | -0.35784300 | 0.30918200  |
| C  | -4.69568700 | -1.66985000 | -2.17258700 |
| H  | -2.81233800 | -2.37009900 | -1.31897600 |
| C  | -4.32670300 | -0.18362600 | -2.22103700 |
| H  | -5.77872400 | -1.79162600 | -1.97912800 |
| H  | -4.92153000 | 0.34909400  | -2.98378500 |
| C  | -4.02962500 | 0.28373000  | 1.66899900  |
| H  | -4.23016700 | 1.35857900  | 1.55686900  |
| H  | -3.07226800 | 0.16830200  | 2.21685100  |
| H  | -3.25943000 | -0.07669900 | -2.48613400 |
| H  | -4.47893900 | -2.16665700 | -3.13464700 |
| H  | -4.22719400 | -3.41559400 | -0.95165300 |
| H  | -2.42456600 | -0.09475100 | -0.02797400 |
| Ir | -0.61014400 | -0.26291800 | -0.30842700 |
| I  | -0.27645800 | 0.10399300  | 2.49629300  |
| C  | 4.71516100  | -0.41748200 | 1.73558700  |
| C  | 3.52305500  | -0.89873800 | 1.15551900  |
| C  | 3.04609300  | -0.31473600 | -0.03629400 |
| C  | 3.79098400  | 0.71353800  | -0.64107100 |
| C  | 4.99440900  | 1.18514100  | -0.10100100 |

|   |             |             |             |
|---|-------------|-------------|-------------|
| C | 5.43219400  | 0.60774100  | 1.09797000  |
| H | 5.08910300  | -0.83980900 | 2.67072900  |
| H | 5.54672600  | 1.98792900  | -0.59552500 |
| H | 6.35907900  | 0.96800500  | 1.55661700  |
| O | 2.78940000  | -1.93709200 | 1.64402200  |
| C | 3.02462900  | -2.34601700 | 2.99103800  |
| H | 4.02625900  | -2.80262200 | 3.11037400  |
| H | 2.90946000  | -1.49375900 | 3.68363400  |
| H | 2.25089100  | -3.09507600 | 3.20935800  |
| O | 3.30508700  | 1.24298400  | -1.82199000 |
| C | 1.90023200  | 0.92080500  | -1.97148700 |
| P | 1.49960900  | -0.63167900 | -0.96834700 |
| C | 1.92495600  | -2.11228900 | -2.09895800 |
| C | 0.92662600  | -2.15349300 | -3.26973600 |
| H | 1.13676300  | -3.04347300 | -3.89249000 |
| H | -0.11110800 | -2.21223000 | -2.90481800 |
| H | 1.00782700  | -1.26581800 | -3.92289200 |
| C | 1.76149500  | -3.38503800 | -1.24246000 |
| H | 1.97719000  | -4.27487400 | -1.86413700 |
| H | 2.44804300  | -3.38922400 | -0.37979600 |
| H | 0.73202000  | -3.46843000 | -0.85505200 |
| C | 3.36465100  | -2.01411100 | -2.63594500 |
| H | 3.56782100  | -2.88150500 | -3.29189200 |
| H | 3.52822600  | -1.09799300 | -3.22966400 |
| H | 4.10644300  | -2.02513300 | -1.82054700 |
| C | 1.06668700  | 2.10596400  | -1.48871700 |
| C | 1.53105100  | 3.39557800  | -1.77825000 |
| C | 0.79955200  | 4.49761500  | -1.33090500 |
| H | 2.46735600  | 3.51013100  | -2.32791000 |
| C | -0.77433500 | 2.95396500  | -0.34754200 |
| C | -0.37118600 | 4.27872000  | -0.60444000 |
| H | 1.13404100  | 5.51788200  | -1.54315800 |
| N | -0.07584500 | 1.87025700  | -0.78120000 |
| O | -1.89533800 | 2.65086000  | 0.34865000  |
| C | -2.48534200 | 3.70540800  | 1.11273400  |
| H | -2.98067900 | 4.45408200  | 0.46524000  |
| H | -1.73395000 | 4.20181500  | 1.75182900  |
| H | -3.23523000 | 3.22216600  | 1.75298900  |
| H | -0.96574100 | 5.11972700  | -0.24453700 |
| H | 1.72672500  | 0.74907000  | -3.04854500 |
| H | -1.04883400 | -0.50881500 | -1.83551600 |
| H | -0.91442600 | -1.80641100 | -0.02818900 |
| H | -4.84561100 | -0.15381700 | 2.27378500  |
| C | -3.50039800 | -2.50176900 | 1.35062100  |
| H | -3.92018300 | -2.16369600 | 2.30855100  |
| H | -3.77128400 | -3.55770200 | 1.19717800  |
| H | -2.39772200 | -2.39175100 | 1.38316200  |
| N | -4.03487700 | -1.71216700 | 0.23848600  |
| C | -4.54817800 | 0.44633600  | -0.84542600 |
| H | -4.10770800 | 1.45460500  | -0.79390800 |
| H | -5.63644400 | 0.55647400  | -0.64410300 |

## H\_transfer\_TS\_face1

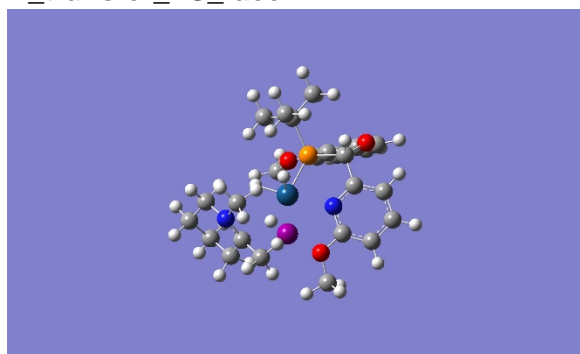

**Lowest energy structure was located by sequential relaxed PES scans. This allowed to identify the minimum energy conformation. However, optimization of obtained TS structure proved to be unsuccessful with various algorithms, grid sizes and step sizes. This suggests very shallow PES around TS. Located structure satisfies single negative frequency analysis.**

|                                              |                |
|----------------------------------------------|----------------|
| Zero-point correction=                       | 0.586974       |
| (Hartree/Particle)                           |                |
| Thermal correction to Energy=                | 0.624652       |
| Thermal correction to Enthalpy=              | 0.625596       |
| Thermal correction to Gibbs Free Energy=     | 0.516526       |
| Sum of electronic and zero-point Energies=   | -              |
| 1766.383180                                  |                |
| Sum of electronic and thermal Energies=      | -              |
| 1766.345502                                  |                |
| Sum of electronic and thermal Enthalpies=    | -              |
| 1766.344558                                  |                |
| Sum of electronic and thermal Free Energies= | -              |
| 1766.453628                                  |                |
| Electronic energy                            | -1767.49439253 |

|   |             |             |             |
|---|-------------|-------------|-------------|
| C | -4.13519600 | -0.40881200 | 1.16406200  |
| C | -3.77594100 | -1.85035700 | 1.53141900  |
| C | -4.02332300 | -0.07577300 | -0.30681100 |
| C | -4.36833300 | -2.82754700 | 0.51360900  |
| H | -2.67494600 | -1.93540200 | 1.54281200  |
| C | -3.89597300 | -2.45329600 | -0.88948500 |
| H | -5.47508400 | -2.80996500 | 0.54674800  |
| H | -4.37582500 | -3.08772900 | -1.65437200 |
| C | -4.41963600 | 1.33487200  | -0.68985000 |
| H | -3.86142300 | 1.71502800  | -1.55631500 |
| H | -4.22114100 | 2.00627800  | 0.15578500  |
| H | -2.79446400 | -2.56986100 | -0.97174400 |
| H | -4.05211100 | -3.86423900 | 0.72514400  |
| H | -4.13194900 | -2.07201400 | 2.55232400  |
| N | -4.21618700 | -1.05392400 | -1.22666200 |
| C | -4.06728400 | -0.72839600 | -2.64366700 |
| H | -3.00702000 | -0.47162100 | -2.85096600 |
| H | -4.71229600 | 0.11733100  | -2.92388700 |
| H | -3.47519600 | 0.28663500  | 1.71683600  |
| H | -2.28601700 | 0.24549600  | -0.38707100 |

|    |             |             |             |
|----|-------------|-------------|-------------|
| H  | -5.18159300 | -0.17436500 | 1.45872400  |
| Ir | -0.61415800 | -0.13287200 | -0.45644200 |
| I  | -0.49224700 | 0.24482600  | 2.36599800  |
| C  | 4.43518700  | -0.84571800 | 2.05232800  |
| C  | 3.26126100  | -1.18625500 | 1.34868300  |
| C  | 2.97036900  | -0.53747000 | 0.13086300  |
| C  | 3.87328300  | 0.41608500  | -0.37155400 |
| C  | 5.06065000  | 0.74759300  | 0.29399200  |
| C  | 5.31551800  | 0.10610000  | 1.51310300  |
| H  | 4.66917800  | -1.31895700 | 3.00848800  |
| H  | 5.74015600  | 1.49494100  | -0.12299500 |
| H  | 6.22566500  | 0.35740800  | 2.06788200  |
| O  | 2.37433800  | -2.14234700 | 1.74088200  |
| C  | 2.44641700  | -2.60754900 | 3.08801100  |
| H  | 3.37364400  | -3.18442000 | 3.27107600  |
| H  | 2.37658900  | -1.76498400 | 3.79833600  |
| H  | 1.57343500  | -3.26181400 | 3.21841900  |
| O  | 3.55954500  | 1.01407600  | -1.57837800 |
| C  | 2.14697300  | 0.85226400  | -1.85905400 |
| P  | 1.50010000  | -0.67954600 | -0.95336000 |
| C  | 1.88668200  | -2.16952300 | -2.08436200 |
| C  | 1.00730400  | -2.08269700 | -3.34441300 |
| H  | 1.19119700  | -2.97219900 | -3.97609600 |
| H  | -0.06174600 | -2.04908900 | -3.08038000 |
| H  | 1.23597400  | -1.19038000 | -3.95469000 |
| C  | 1.51892900  | -3.43800900 | -1.28734300 |
| H  | 1.70624300  | -4.33121300 | -1.91331900 |
| H  | 2.11666400  | -3.52867000 | -0.36535600 |
| H  | 0.45396000  | -3.42662000 | -1.00022700 |
| C  | 3.37451000  | -2.20381300 | -2.47991600 |
| H  | 3.55315400  | -3.06704100 | -3.14848200 |
| H  | 3.68592700  | -1.29141500 | -3.01728600 |
| H  | 4.02847300  | -2.31674500 | -1.59969400 |
| C  | 1.40034000  | 2.09629800  | -1.38130800 |
| C  | 2.03256200  | 3.33998100  | -1.50750000 |
| C  | 1.38633300  | 4.48307000  | -1.02976600 |
| H  | 3.03033100  | 3.38417900  | -1.94825000 |
| C  | -0.44826400 | 3.06890400  | -0.35690900 |
| C  | 0.12803800  | 4.35049400  | -0.44217000 |
| H  | 1.85636400  | 5.46820900  | -1.11115400 |
| N  | 0.16864200  | 1.94748700  | -0.81441800 |
| O  | -1.66800100 | 2.84663000  | 0.18001000  |
| C  | -2.15777600 | 3.81678100  | 1.10895400  |
| H  | -2.48800700 | 4.74436600  | 0.60298600  |
| H  | -1.39316300 | 4.04819700  | 1.87052500  |
| H  | -3.01841100 | 3.34369200  | 1.60242900  |
| H  | -0.40533000 | 5.22245100  | -0.05909900 |
| H  | 2.05138400  | 0.74094500  | -2.95337700 |
| H  | -0.95606200 | -0.34424900 | -2.01504300 |
| H  | -1.06688600 | -1.64363800 | -0.19939900 |
| H  | -5.50426500 | 1.36812900  | -0.91456100 |
| H  | -4.35768100 | -1.60329500 | -3.24428000 |

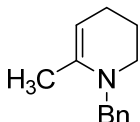

**NBn\_protonation\_TS\_face1**

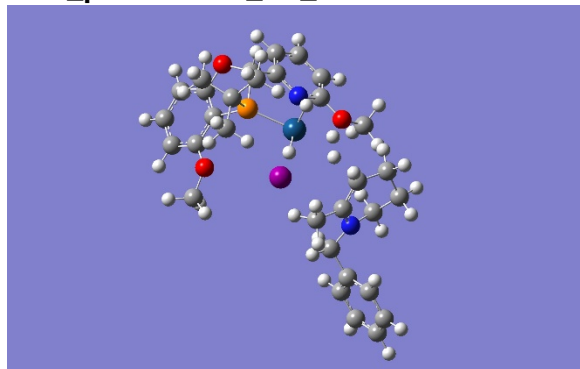

Zero-point correction= 0.662159  
 (Hartree/Particle)  
 Thermal correction to Energy= 0.704769  
 Thermal correction to Enthalpy= 0.705713  
 Thermal correction to Gibbs Free Energy= 0.582563  
 Sum of electronic and zero-point Energies= -1997.037945  
 Sum of electronic and thermal Energies= -1996.995335  
 Sum of electronic and thermal Enthalpies= -1996.994391  
 Sum of electronic and thermal Free Energies= -1997.117541  
 Electronic energy -1998.29069634

|   |             |             |             |
|---|-------------|-------------|-------------|
| C | 2.59165600  | 1.29292700  | 2.25592300  |
| C | 3.10381300  | 2.66750000  | 1.85223300  |
| C | 3.16867500  | 0.11200700  | 1.77239100  |
| C | 4.38713400  | 2.54744200  | 1.01635400  |
| H | 2.32564700  | 3.21408000  | 1.27914300  |
| C | 4.27071200  | 1.39079100  | 0.02234900  |
| H | 5.25351600  | 2.35498400  | 1.67559700  |
| H | 5.19713200  | 1.28391100  | -0.56613600 |
| H | 3.43120900  | 1.55440500  | -0.68672100 |
| H | 4.59896700  | 3.48238700  | 0.46757100  |
| H | 3.29809800  | 3.27669100  | 2.75378600  |
| N | 4.04054700  | 0.11935300  | 0.71918100  |
| H | 1.19906100  | 1.24969000  | 1.54052600  |
| C | -3.35176900 | -3.45928400 | -1.93334800 |
| C | -2.81910300 | -2.77629600 | -0.82078000 |
| C | -3.30533300 | -1.49310900 | -0.49660800 |
| C | -4.33817100 | -0.93624800 | -1.27125000 |
| C | -4.90432800 | -1.60903500 | -2.36155200 |
| C | -4.38521700 | -2.87051300 | -2.67943200 |
| H | -2.97284200 | -4.44396100 | -2.21484600 |
| H | -5.70350000 | -1.14475900 | -2.94435600 |
| H | -4.79259500 | -3.41403700 | -3.53833800 |
| O | -1.87089400 | -3.28271700 | 0.01537900  |
| C | -1.11406800 | -4.40453300 | -0.43834200 |
| H | -0.63889300 | -4.18779300 | -1.41148500 |
| H | -0.33345000 | -4.55738600 | 0.31992500  |
| H | -1.73858400 | -5.31567800 | -0.51359200 |
| O | -4.80550600 | 0.31165300  | -0.90642400 |
| C | -3.84772600 | 0.97686900  | -0.04939900 |
| P | -2.76004500 | -0.31946400 | 0.79821600  |

|    |             |             |             |
|----|-------------|-------------|-------------|
| C  | -3.69625400 | -0.84792200 | 2.37434800  |
| C  | -2.88732100 | -1.99676100 | 3.01188700  |
| H  | -3.39837700 | -2.33372700 | 3.93348100  |
| H  | -2.79421700 | -2.85930800 | 2.33135700  |
| H  | -1.87114500 | -1.66153300 | 3.27844800  |
| C  | -5.12130600 | -1.32575300 | 2.03711300  |
| H  | -5.63742100 | -1.61059300 | 2.97304100  |
| H  | -5.72290800 | -0.53934400 | 1.54880200  |
| H  | -5.11201600 | -2.20615400 | 1.37396600  |
| C  | -3.75468700 | 0.34151000  | 3.34950400  |
| H  | -2.74645200 | 0.71198700  | 3.59416500  |
| H  | -4.34199600 | 1.18701500  | 2.94793400  |
| H  | -4.24673700 | 0.01481200  | 4.28498800  |
| C  | -3.00232400 | 1.93129100  | -0.88679600 |
| C  | -3.62576400 | 2.64586700  | -1.91729800 |
| C  | -2.86166800 | 3.52288600  | -2.69092800 |
| H  | -4.68931400 | 2.48720600  | -2.10572700 |
| C  | -0.94557400 | 2.91786600  | -1.35597600 |
| C  | -1.50262400 | 3.66757200  | -2.40977200 |
| H  | -3.31786200 | 4.09323100  | -3.50606900 |
| N  | -1.67559100 | 2.04888400  | -0.60554400 |
| Ir | -0.77459000 | 0.71804900  | 0.95261500  |
| O  | 0.35193400  | 2.99662800  | -0.99237400 |
| C  | 1.23446700  | 3.74856200  | -1.82464700 |
| H  | 0.96892100  | 4.82251100  | -1.83995500 |
| H  | 1.24680200  | 3.34818800  | -2.85437800 |
| H  | 2.22958300  | 3.62826800  | -1.37422500 |
| H  | 0.50773200  | 1.83622500  | 1.14213500  |
| H  | -1.37235200 | 1.58143900  | 2.16600500  |
| I  | 0.64022600  | -0.69688400 | -1.10549900 |
| H  | -0.23860600 | -0.28749600 | 2.07700200  |
| H  | -0.88259400 | 4.34613300  | -2.99726400 |
| H  | -4.43149600 | 1.54798700  | 0.69402900  |
| H  | 2.12354800  | 1.20817300  | 3.24370900  |
| C  | 4.35108300  | -1.07122300 | -0.07753500 |
| H  | 4.01480500  | -1.96025500 | 0.47707000  |
| H  | 3.74356000  | -1.04958600 | -1.00622000 |
| C  | 2.75634900  | -1.20661100 | 2.37104600  |
| H  | 2.08013000  | -1.73918700 | 1.67640500  |
| H  | 3.62245600  | -1.85402600 | 2.59557100  |
| H  | 2.20235900  | -1.03319700 | 3.30486400  |
| C  | 5.82994300  | -1.20169600 | -0.40521000 |
| C  | 6.81482800  | -0.99707900 | 0.58027500  |
| C  | 6.23466400  | -1.57404900 | -1.69956300 |
| C  | 8.17247700  | -1.16666300 | 0.27840400  |
| H  | 6.50767700  | -0.69246600 | 1.58727900  |
| C  | 7.59268800  | -1.75143000 | -2.00279100 |
| H  | 5.47520500  | -1.72597900 | -2.47547800 |
| C  | 8.56571300  | -1.54743300 | -1.01424200 |
| H  | 8.92722500  | -1.00248000 | 1.05501300  |
| H  | 7.89035400  | -2.04056500 | -3.01629100 |
| H  | 9.62679200  | -1.67970500 | -1.25011800 |



## NBn\_protonation\_TS\_face2

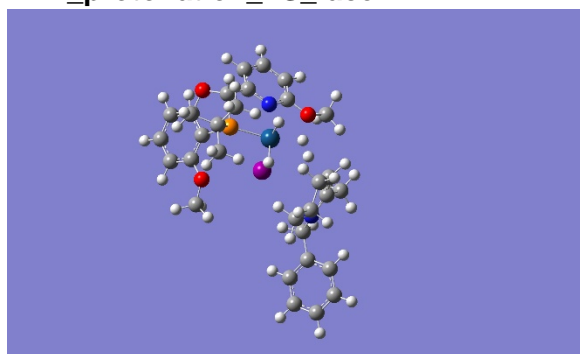

Zero-point correction= 0.663030  
 (Hartree/Particle)  
 Thermal correction to Energy= 0.705644  
 Thermal correction to Enthalpy= 0.706588  
 Thermal correction to Gibbs Free Energy= 0.583017  
 Sum of electronic and zero-point Energies= -  
 1997.037126  
 Sum of electronic and thermal Energies= -  
 1996.994512  
 Sum of electronic and thermal Enthalpies= -  
 1996.993568  
 Sum of electronic and thermal Free Energies= -  
 1997.117139  
 Electronic energy -1998.29035967

|   |             |             |             |
|---|-------------|-------------|-------------|
| C | 2.63180900  | 2.10159900  | 1.79042300  |
| H | 1.14970900  | 1.88569200  | 1.19473700  |
| C | -2.49572800 | -3.75428200 | -2.04283300 |
| C | -2.01198700 | -3.02366600 | -0.93902400 |
| C | -2.77869800 | -1.96054600 | -0.42175600 |
| C | -4.02391900 | -1.66433800 | -1.00170800 |
| C | -4.53900100 | -2.39559200 | -2.07996100 |
| C | -3.74919600 | -3.43421900 | -2.58932000 |
| H | -1.90879400 | -4.56895000 | -2.47202700 |
| H | -5.51017800 | -2.13909000 | -2.50990600 |
| H | -4.11571100 | -4.01227500 | -3.44404700 |
| O | -0.84584500 | -3.28871700 | -0.28522900 |
| C | 0.11450300  | -4.11058200 | -0.94747600 |
| H | 0.36577600  | -3.69505800 | -1.93957300 |
| H | 1.00822200  | -4.09090000 | -0.30777600 |
| H | -0.24057300 | -5.15425000 | -1.04994900 |
| O | -4.75078200 | -0.62502900 | -0.45498900 |
| C | -3.90905200 | 0.21016100  | 0.37456800  |
| P | -2.37822600 | -0.76879000 | 0.90446500  |
| C | -2.85109600 | -1.64999800 | 2.53118700  |
| C | -1.63202700 | -2.49517300 | 2.95202300  |
| H | -1.85993400 | -3.02021800 | 3.89886800  |
| H | -1.37549600 | -3.24892500 | 2.18926300  |
| H | -0.74912000 | -1.85332500 | 3.10887000  |
| C | -4.08364000 | -2.55084200 | 2.32730100  |
| H | -4.34977000 | -3.02459400 | 3.29075900  |
| H | -4.96433600 | -1.98321500 | 1.97858300  |
| H | -3.88837100 | -3.35308900 | 1.59710300  |
| C | -3.14390500 | -0.59540700 | 3.61374600  |
| H | -2.28791000 | 0.08299000  | 3.75846400  |
| H | -4.03236800 | 0.01690000  | 3.37593800  |
| H | -3.34801800 | -1.11031200 | 4.57115500  |
| C | -3.51365400 | 1.46509200  | -0.39651400 |
| C | -4.46299500 | 2.06479600  | -1.23317400 |
| C | -4.11232800 | 3.22063500  | -1.93572600 |

|    |             |             |             |
|----|-------------|-------------|-------------|
| H  | -5.44811900 | 1.60509400  | -1.33417100 |
| C  | -1.93280000 | 3.09504800  | -0.91186500 |
| C  | -2.83260200 | 3.75235300  | -1.77208300 |
| H  | -4.82930800 | 3.70932400  | -2.60277600 |
| N  | -2.25309500 | 1.95640300  | -0.24138500 |
| Ir | -0.73538300 | 0.74190000  | 0.88057500  |
| O  | -0.67988200 | 3.53403700  | -0.66858000 |
| C  | -0.16072900 | 4.57311800  | -1.49839800 |
| H  | -0.68909500 | 5.53137000  | -1.33463900 |
| H  | -0.21264000 | 4.29083100  | -2.56520700 |
| H  | 0.89126100  | 4.68291700  | -1.20030700 |
| H  | 0.27812600  | 2.14665200  | 1.00872800  |
| H  | -1.22289800 | 1.24582100  | 2.32583700  |
| I  | 0.50004600  | 0.04725500  | -1.61113200 |
| H  | 0.27478000  | -0.21701200 | 1.66290200  |
| H  | -2.53297200 | 4.65788500  | -2.30186600 |
| H  | -4.51596100 | 0.49261100  | 1.25313200  |
| H  | 2.50268200  | 3.17966800  | 1.94501400  |
| C  | 3.37201600  | 1.74986000  | 0.65657100  |
| C  | 3.59797600  | 2.77111900  | -0.43143400 |
| H  | 3.00537300  | 2.52607100  | -1.33116500 |
| H  | 3.28336400  | 3.76376500  | -0.07432700 |
| H  | 4.66148800  | 2.83659100  | -0.72306100 |
| C  | 3.51987300  | -0.54061000 | 1.48208100  |
| H  | 2.51829800  | -0.94666100 | 1.23924300  |
| H  | 4.26066500  | -1.35152400 | 1.37812200  |
| C  | 3.54654800  | 0.03992300  | 2.89776200  |
| H  | 3.30400100  | -0.75918600 | 3.61965200  |
| H  | 4.57477400  | 0.38182800  | 3.12005000  |
| C  | 4.33446800  | -0.03631400 | -0.79540000 |
| H  | 3.59408800  | -0.76750000 | -1.17771800 |
| H  | 4.34485400  | 0.78192800  | -1.53147000 |
| N  | 3.85653500  | 0.48694600  | 0.48348700  |
| C  | 2.55909700  | 1.21182600  | 3.01787200  |
| H  | 2.78513200  | 1.80442500  | 3.92334700  |
| H  | 1.52809100  | 0.82281200  | 3.14321900  |
| C  | 5.71778900  | -0.66593600 | -0.71134700 |
| C  | 6.01697200  | -1.80772500 | -1.47638300 |
| C  | 6.73037700  | -0.10071600 | 0.08630000  |
| C  | 7.30280300  | -2.36683300 | -1.45644200 |
| H  | 5.23204400  | -2.26092300 | -2.09335200 |
| C  | 8.01429700  | -0.66192300 | 0.11415300  |
| H  | 6.49916500  | 0.77885100  | 0.69770500  |
| C  | 8.30574300  | -1.79548700 | -0.65988000 |
| H  | 7.51835900  | -3.25662500 | -2.05749700 |
| H  | 8.79069000  | -0.21255300 | 0.74265800  |
| H  | 9.30856700  | -2.23461500 | -0.63769900 |

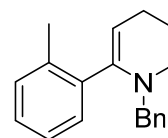

## NBn\_oPh\_protonation\_TS\_face1

Zero-point correction= 0.740010  
 (Hartree/Particle)  
 Thermal correction to Energy= 0.787921  
 Thermal correction to Enthalpy= 0.788865  
 Thermal correction to Gibbs Free Energy= 0.653299  
 Sum of electronic and zero-point Energies= -  
 2227.710262  
 Sum of electronic and thermal Energies= -  
 2227.662350

Sum of electronic and thermal Enthalpies= - 2227.661406

Sum of electronic and thermal Free Energies= - 2227.796972

Electronic energy -2229.11318139

|    |             |             |             |
|----|-------------|-------------|-------------|
| C  | -2.44089300 | 0.55573600  | -2.24705600 |
| C  | -2.76405800 | 2.02479100  | -2.49502700 |
| C  | -3.06612400 | -0.17011400 | -1.22144200 |
| C  | -3.82792500 | 2.52910000  | -1.50702200 |
| H  | -1.84144300 | 2.63538500  | -2.41028700 |
| C  | -3.60444400 | 1.92006400  | -0.11988200 |
| H  | -4.83748100 | 2.24168000  | -1.85453100 |
| H  | -4.36993800 | 2.26910700  | 0.59224900  |
| H  | -2.60400600 | 2.18476600  | 0.28406300  |
| H  | -3.81427400 | 3.63088100  | -1.43031000 |
| H  | -3.12218000 | 2.15847200  | -3.53281600 |
| N  | -3.69388100 | 0.45542200  | -0.18347800 |
| H  | -0.96972000 | 0.68156700  | -1.73021300 |
| C  | 3.32361200  | -2.00657600 | 3.54091800  |
| C  | 2.75166300  | -1.94696200 | 2.25392700  |
| C  | 3.38672900  | -1.18910300 | 1.24893500  |
| C  | 4.58445000  | -0.51672100 | 1.54797900  |
| C  | 5.18593600  | -0.58523400 | 2.81119300  |
| C  | 4.53010700  | -1.33470000 | 3.79591800  |
| H  | 2.84001600  | -2.57176400 | 4.34040600  |
| H  | 6.11660900  | -0.04905300 | 3.01165600  |
| H  | 4.96483900  | -1.39287400 | 4.79927200  |
| O  | 1.61563800  | -2.60341300 | 1.88146900  |
| C  | 0.76041900  | -3.08198200 | 2.91911700  |
| H  | 0.48108400  | -2.26033200 | 3.60223000  |
| H  | -0.14185400 | -3.45224900 | 2.41106500  |
| H  | 1.22705000  | -3.91042200 | 3.48608200  |
| O  | 5.17414500  | 0.21582000  | 0.53635400  |
| C  | 4.23102300  | 0.46060900  | -0.53387400 |
| P  | 2.85477300  | -0.83318900 | -0.46285600 |
| C  | 3.46560300  | -2.31558400 | -1.49454600 |
| C  | 2.42817100  | -3.44361800 | -1.31583400 |
| H  | 2.74042200  | -4.32206500 | -1.91156600 |
| H  | 2.33931200  | -3.75443500 | -0.26158900 |
| H  | 1.43099500  | -3.12379600 | -1.66228000 |
| C  | 4.85265400  | -2.78670000 | -1.01806200 |
| H  | 5.17843600  | -3.64043500 | -1.64122300 |
| H  | 5.61791100  | -1.99564400 | -1.10773200 |
| H  | 4.83371300  | -3.12163500 | 0.03207200  |
| C  | 3.52762500  | -1.90529000 | -2.97678400 |
| H  | 2.54695700  | -1.55774300 | -3.33822200 |
| H  | 4.26423300  | -1.10244800 | -3.16069100 |
| H  | 3.83634400  | -2.77996000 | -3.57943000 |
| C  | 3.66052800  | 1.87023900  | -0.40568400 |
| C  | 4.51684100  | 2.90278600  | -0.00290800 |
| C  | 4.01309900  | 4.20277900  | 0.08682600  |
| H  | 5.55309800  | 2.66675600  | 0.24704900  |
| C  | 1.87667800  | 3.34830700  | -0.63536600 |
| C  | 2.67722500  | 4.43753700  | -0.24095800 |
| H  | 4.65444600  | 5.03114900  | 0.40367000  |
| N  | 2.34767000  | 2.07448500  | -0.70204100 |
| Ir | 1.01473700  | 0.29169300  | -1.07393800 |
| O  | 0.57804600  | 3.46773800  | -0.98461400 |
| C  | -0.04739700 | 4.73916000  | -0.81156000 |
| H  | 0.40280600  | 5.50865700  | -1.46670300 |
| H  | -0.00006100 | 5.06904100  | 0.24205100  |
| H  | -1.09696300 | 4.58661300  | -1.10013100 |
| H  | -0.18986900 | 1.30482100  | -1.74947000 |
| H  | 1.45315000  | 0.14560900  | -2.60880400 |

|   |             |             |             |
|---|-------------|-------------|-------------|
| I | -0.12256100 | 0.68870500  | 1.53628600  |
| H | 0.19587100  | -1.05595100 | -1.31633200 |
| H | 2.26031600  | 5.44425400  | -0.18618900 |
| H | 4.79905300  | 0.37838000  | -1.47788800 |
| H | -2.14358300 | -0.04312100 | -3.11650900 |
| C | -4.06445900 | -0.21344100 | 1.06906700  |
| H | -3.99171700 | -1.29975700 | 0.90151800  |
| H | -3.31080900 | 0.04459800  | 1.84116200  |
| C | -3.01082700 | -1.66797100 | -1.25683900 |
| C | -2.06739500 | -2.35402300 | -0.46433000 |
| C | -3.86842900 | -2.38899400 | -2.12784600 |
| C | -1.96551400 | -3.75023600 | -0.53056000 |
| H | -1.40083300 | -1.77706100 | 0.18678500  |
| C | -3.75503200 | -3.79139500 | -2.16486800 |
| C | -2.81372100 | -4.47163500 | -1.38105800 |
| H | -1.21707000 | -4.26878700 | -0.07830600 |
| H | -4.42089100 | -4.35684900 | -2.82724200 |
| H | -2.74509400 | -5.56334700 | -1.43658400 |
| C | -4.87801100 | -1.69009100 | -3.01102300 |
| H | -4.38822900 | -1.18509600 | -3.86336400 |
| H | -5.60521300 | -2.40944600 | -3.42264500 |
| H | -5.43741800 | -0.91013600 | -2.46547100 |
| C | -5.46084900 | 0.14673700  | 1.54706600  |
| C | -6.57826500 | -0.02075000 | 0.70620500  |
| C | -5.66449100 | 0.62117600  | 2.85509100  |
| C | -7.86814000 | 0.27499500  | 1.16446000  |
| H | -6.42961000 | -0.38849300 | -0.31542300 |
| C | -6.95599500 | 0.91325900  | 3.31953900  |
| H | -4.79986500 | 0.76090900  | 3.51441300  |
| C | -8.06116900 | 0.74156000  | 2.47479800  |
| H | -8.72745300 | 0.13686400  | 0.49949700  |
| H | -7.09631500 | 1.28154300  | 4.34127800  |
| H | -9.06991300 | 0.97111200  | 2.83364700  |

### NBn\_oPh\_protonation\_TS\_face2

Zero-point correction= 0.740675

(Hartree/Particle)

Thermal correction to Energy= 0.788634

Thermal correction to Enthalpy= 0.789578

Thermal correction to Gibbs Free Energy= 0.654230

Sum of electronic and zero-point Energies= - 2227.711923

Sum of electronic and thermal Energies= - 2227.663965

Sum of electronic and thermal Enthalpies= - 2227.663021

Sum of electronic and thermal Free Energies= - 2227.798368

Electronic energy -2229.11185550

|   |             |             |             |
|---|-------------|-------------|-------------|
| C | 2.54703600  | 1.13995400  | 2.05010300  |
| H | 1.08025100  | 1.27391000  | 1.37727000  |
| C | -3.56628700 | -3.23048700 | -2.35682900 |
| C | -2.98137400 | -2.71362000 | -1.18355400 |
| C | -3.53888700 | -1.56877900 | -0.57807000 |
| C | -4.68028800 | -0.97707800 | -1.14558400 |
| C | -5.29606000 | -1.49124900 | -2.29430700 |
| C | -4.71315300 | -2.61805600 | -2.88742800 |
| H | -3.13976600 | -4.10338500 | -2.85545300 |
| H | -6.18179900 | -1.00652700 | -2.71178200 |
| H | -5.15980100 | -3.03235100 | -3.79734100 |
| O | -1.90866900 | -3.26354100 | -0.54728400 |
| C | -1.10876900 | -4.18986500 | -1.28165400 |

|    |             |             |             |
|----|-------------|-------------|-------------|
| H  | -0.74989300 | -3.73168900 | -2.22030700 |
| H  | -0.24968800 | -4.41507700 | -0.63394800 |
| H  | -1.65954800 | -5.12547000 | -1.49784800 |
| O  | -5.20200300 | 0.13601000  | -0.51743900 |
| C  | -4.24431400 | 0.70473500  | 0.40810000  |
| P  | -2.94846900 | -0.60140600 | 0.85328100  |
| C  | -3.62548900 | -1.50663300 | 2.38966800  |
| C  | -2.62637500 | -2.63399800 | 2.71973400  |
| H  | -2.97814900 | -3.18527900 | 3.61214600  |
| H  | -2.52764400 | -3.34762900 | 1.88515500  |
| H  | -1.62718400 | -2.21944100 | 2.93371100  |
| C  | -5.02008600 | -2.09532000 | 2.10593700  |
| H  | -5.39299300 | -2.59707800 | 3.01842000  |
| H  | -5.75533800 | -1.31998000 | 1.82702500  |
| H  | -4.99160600 | -2.84219000 | 1.29570900  |
| C  | -3.69733900 | -0.52137800 | 3.57021100  |
| H  | -2.71481900 | -0.06778100 | 3.77707200  |
| H  | -4.42256900 | 0.29413000  | 3.39666500  |
| H  | -4.02890100 | -1.06703500 | 4.47347000  |
| C  | -3.59611400 | 1.93312100  | -0.22054200 |
| C  | -4.40654700 | 2.81625400  | -0.94477000 |
| C  | -3.82933800 | 3.95804500  | -1.50601800 |
| H  | -5.46680300 | 2.58619600  | -1.06784000 |
| C  | -1.71306800 | 3.25320700  | -0.58743800 |
| C  | -2.46568000 | 4.18996900  | -1.32216500 |
| H  | -4.43435100 | 4.66675900  | -2.08009700 |
| N  | -2.26074500 | 2.13190100  | -0.04651900 |
| Ir | -1.03561700 | 0.53445900  | 0.95990800  |
| O  | -0.39155100 | 3.37879900  | -0.35018000 |
| C  | 0.28622800  | 4.50528200  | -0.91066800 |
| H  | -0.10453600 | 5.45569400  | -0.50120900 |
| H  | 0.20475900  | 4.51244800  | -2.01318700 |
| H  | 1.33965900  | 4.38067600  | -0.62649200 |
| H  | 0.27226400  | 1.67530700  | 1.21087500  |
| H  | -1.43909100 | 1.02143000  | 2.43568900  |
| I  | 0.06660600  | -0.22619900 | -1.57169000 |
| H  | -0.25758300 | -0.66159400 | 1.67687100  |
| H  | -1.98976700 | 5.07479700  | -1.74685300 |
| H  | -4.81669000 | 1.00849900  | 1.30282200  |
| H  | 2.61571900  | 2.20009100  | 2.32361800  |
| C  | 3.30851300  | 0.76977700  | 0.93418100  |
| C  | 2.83946500  | -1.56440900 | 1.41527500  |
| H  | 1.79226500  | -1.65178100 | 1.06481400  |
| H  | 3.35002700  | -2.52336700 | 1.22802000  |
| C  | 2.89127500  | -1.20109900 | 2.90205800  |
| H  | 2.40774200  | -2.00347000 | 3.48574200  |
| H  | 3.95079700  | -1.16037600 | 3.21715000  |
| C  | 3.94100000  | -0.96676500 | -0.73553200 |
| H  | 3.03556800  | -1.22980200 | -1.32198600 |
| H  | 4.40074100  | -0.09788800 | -1.23338600 |
| N  | 3.52070400  | -0.53939000 | 0.60577000  |
| C  | 2.20756400  | 0.15202700  | 3.15461900  |
| H  | 2.52997100  | 0.56206900  | 4.12987600  |
| H  | 1.10882800  | 0.01593000  | 3.21540900  |
| C  | 3.90563900  | 1.84392500  | 0.07309100  |
| C  | 3.23579200  | 2.26156800  | -1.09466600 |
| C  | 5.12627100  | 2.46092100  | 0.45269100  |
| C  | 3.76831100  | 3.28331900  | -1.89414400 |
| H  | 2.29725000  | 1.76422700  | -1.37194300 |
| C  | 5.64092400  | 3.48239700  | -0.36789300 |
| C  | 4.97495800  | 3.89556900  | -1.52954200 |
| H  | 3.24287300  | 3.58892400  | -2.80523300 |
| H  | 6.58680700  | 3.95916600  | -0.08536200 |
| H  | 5.40322500  | 4.69011500  | -2.14995500 |
| C  | 5.86508400  | 2.04986600  | 1.70647800  |

|   |            |             |             |
|---|------------|-------------|-------------|
| H | 5.32567200 | 2.36951000  | 2.61641400  |
| H | 5.97398400 | 0.95355200  | 1.77734400  |
| H | 6.87170000 | 2.49817400  | 1.73599200  |
| C | 4.92024000 | -2.12687600 | -0.71852900 |
| C | 4.67163600 | -3.27180200 | -1.49636700 |
| C | 6.10711200 | -2.06765700 | 0.03772800  |
| C | 5.59090700 | -4.33113100 | -1.52895400 |
| H | 3.74705800 | -3.32853200 | -2.08242200 |
| C | 7.02372700 | -3.12639300 | 0.01331700  |
| H | 6.30789000 | -1.18181400 | 0.65132300  |
| C | 6.76912000 | -4.26156100 | -0.77283500 |
| H | 5.38174300 | -5.21464300 | -2.14135900 |
| H | 7.94259400 | -3.06514700 | 0.60631700  |
| H | 7.48680000 | -5.08835200 | -0.79325700 |

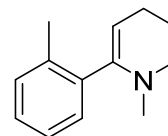

### NMe\_oPh\_protonation\_TS\_face1

|                                              |             |                |             |
|----------------------------------------------|-------------|----------------|-------------|
| Zero-point correction=                       |             | 0.661021       |             |
| (Hartree/Particle)                           |             |                |             |
| Thermal correction to Energy=                | 0.704228    |                |             |
| Thermal correction to Enthalpy=              | 0.705172    |                |             |
| Thermal correction to Gibbs Free Energy=     | 0.582303    |                |             |
| Sum of electronic and zero-point Energies=   | -           | 1997.039925    |             |
| Sum of electronic and thermal Energies=      | -           | 1996.996718    |             |
| Sum of electronic and thermal Enthalpies=    | -           | 1996.995774    |             |
| Sum of electronic and thermal Free Energies= | -           | 1997.118643    |             |
| Electronic energy                            |             | -1998.29463566 |             |
| C                                            | -3.41336200 | 0.94810700     | -1.20894400 |
| C                                            | -3.62922600 | 2.45582000     | -1.28859500 |
| C                                            | -3.86720500 | 0.20676000     | -0.10794500 |
| C                                            | -4.42437100 | 2.96520300     | -0.07577100 |
| H                                            | -2.65326200 | 2.97984900     | -1.35355800 |
| C                                            | -3.98299500 | 2.24214400     | 1.20121200  |
| H                                            | -5.50407400 | 2.77965100     | -0.22500900 |
| H                                            | -4.56174600 | 2.59365500     | 2.07323700  |
| H                                            | -2.90592500 | 2.41376000     | 1.41383000  |
| H                                            | -4.29958400 | 4.05482600     | 0.05685400  |
| H                                            | -4.16995600 | 2.70667600     | -2.21976700 |
| N                                            | -4.20526900 | 0.79925800     | 1.07270200  |
| H                                            | -1.84081700 | 0.92588300     | -1.06452700 |
| C                                            | 3.36214500  | -2.55183300    | 2.68495000  |
| C                                            | 2.52555500  | -2.30113700    | 1.57865500  |
| C                                            | 2.95815600  | -1.41504200    | 0.57099200  |
| C                                            | 4.21962600  | -0.80589400    | 0.68489000  |
| C                                            | 5.07883900  | -1.06074300    | 1.76155600  |
| C                                            | 4.62250400  | -1.93625500    | 2.75509300  |
| H                                            | 3.04068400  | -3.22085600    | 3.48580800  |
| H                                            | 6.05343200  | -0.57043100    | 1.82133400  |
| H                                            | 5.26313500  | -2.14253300    | 3.61886400  |
| O                                            | 1.30819400  | -2.88189000    | 1.38057900  |
| C                                            | 0.69758000  | -3.53473700    | 2.49336700  |
| H                                            | 0.61753900  | -2.84805000    | 3.35474000  |
| H                                            | -0.31179900 | -3.81055500    | 2.15570900  |

|    |             |             |             |                                              |                                     |
|----|-------------|-------------|-------------|----------------------------------------------|-------------------------------------|
| H  | 1.25076400  | -4.44822400 | 2.78538600  | Sum of electronic and zero-point Energies=   | -                                   |
| O  | 4.60504100  | 0.05420700  | -0.32549500 | 1997.041358                                  |                                     |
| C  | 3.46143000  | 0.45881400  | -1.11562000 | Sum of electronic and thermal Energies=      | -                                   |
| P  | 2.08185200  | -0.81795900 | -0.91680800 | 1996.998210                                  |                                     |
| C  | 2.38868700  | -2.15350600 | -2.24381700 | Sum of electronic and thermal Enthalpies=    | -                                   |
| C  | 1.33935300  | -3.26111800 | -2.01423200 | 1996.997266                                  |                                     |
| H  | 1.47408200  | -4.05364100 | -2.77431800 | Sum of electronic and thermal Free Energies= | -                                   |
| H  | 1.43983900  | -3.71820300 | -1.01570100 | 1997.119761                                  |                                     |
| H  | 0.31595700  | -2.86027100 | -2.10470200 | Electronic energy                            | -1998.29323846                      |
| C  | 3.81024400  | -2.73347900 | -2.12120400 |                                              |                                     |
| H  | 3.96161600  | -3.49243300 | -2.91129500 | C                                            | -3.26942500 -0.90046700 -1.64952700 |
| H  | 4.58994000  | -1.96154000 | -2.24401000 | H                                            | -1.89448300 -0.08796400 -1.27312600 |
| H  | 3.96866100  | -3.22225200 | -1.14601800 | C                                            | 4.08190300 -1.50072100 2.91117100   |
| C  | 2.18851700  | -1.53520000 | -3.63921600 | C                                            | 3.31867700 -1.58534000 1.72943200   |
| H  | 1.18242300  | -1.09993400 | -3.74706700 | C                                            | 3.43708800 -0.57344000 0.75492200   |
| H  | 2.92954200  | -0.74555300 | -3.85937100 | C                                            | 4.32907500 0.49031400 0.97330400    |
| H  | 2.31307900  | -2.32502600 | -4.40350700 | C                                            | 5.11907800 0.57968400 2.12673900    |
| C  | 2.99145600  | 1.83932700  | -0.66490900 | C                                            | 4.97116000 -0.42843200 3.08747400   |
| C  | 3.95835400  | 2.78970900  | -0.31395900 | H                                            | 3.99252800 -2.26261600 3.68835900   |
| C  | 3.54174600  | 4.05740600  | 0.09958000  | H                                            | 5.80178100 1.42121300 2.26638400    |
| H  | 5.01373400  | 2.51258200  | -0.34989700 | H                                            | 5.56115900 -0.37775200 4.00854100   |
| C  | 1.26299600  | 3.33882400  | -0.23070800 | O                                            | 2.47459900 -2.61251100 1.42687700   |
| C  | 2.17689100  | 4.34396300  | 0.14029300  | C                                            | 2.04470100 -3.44851000 2.50120100   |
| H  | 4.27189300  | 4.82048800  | 0.38675600  | H                                            | 1.58948700 -2.84217300 3.30423500   |
| N  | 1.65486400  | 2.09571900  | -0.61790300 | H                                            | 1.28361900 -4.11395900 2.06980800   |
| Ir | 0.20492900  | 0.40512100  | -0.95773500 | H                                            | 2.87663600 -4.05707900 2.90503800   |
| O  | -0.07565000 | 3.51817200  | -0.24020700 | O                                            | 4.42401400 1.45635400 -0.00852500   |
| C  | -0.58974700 | 4.71598100  | 0.34179800  | C                                            | 3.30535300 1.37683100 -0.92350400   |
| H  | -0.28012900 | 5.61382500  | -0.22571400 | P                                            | 2.51638200 -0.33745700 -0.80406400  |
| H  | -0.27613700 | 4.80889300  | 1.39706100  | C                                            | 3.41979700 -1.41631700 -2.09179300  |
| H  | -1.68306900 | 4.61652600  | 0.29158900  | C                                            | 2.85127500 -2.84464200 -1.96497900  |
| H  | -1.06173500 | 1.51722600  | -1.24738800 | H                                            | 3.36124700 -3.50616400 -2.69052800  |
| H  | 0.31531700  | 0.47537000  | -2.55499900 | H                                            | 3.00197800 -3.25646900 -0.95334000  |
| I  | -0.34492600 | 0.45140500  | 1.86867700  | H                                            | 1.76978400 -2.85721500 -2.18040000  |
| H  | -0.70536000 | -0.87838700 | -1.22698300 | C                                            | 4.93749800 -1.42045800 -1.82841300  |
| H  | 1.82515800  | 5.32637300  | 0.45842400  | H                                            | 5.43814000 -2.02358400 -2.60873000  |
| H  | 3.80466600  | 0.50656700  | -2.16432500 | H                                            | 5.37134200 -0.40544900 -1.85925300  |
| H  | -3.39281100 | 0.39453200  | -2.15552400 | H                                            | 5.18161300 -1.86232000 -0.84853800  |
| C  | -4.32234400 | 0.06477100  | 2.32789800  | C                                            | 3.13045300 -0.87118700 -3.50222500  |
| H  | -4.59072900 | -0.98163300 | 2.12834100  | H                                            | 2.04780800 -0.81881500 -3.70010900  |
| H  | -3.36063000 | 0.08692800  | 2.87893900  | H                                            | 3.55794800 0.13546800 -3.66086200   |
| H  | -5.10944500 | 0.52910300  | 2.94744600  | H                                            | 3.59184600 -1.54374300 -4.24937600  |
| C  | -4.01303400 | -1.28137400 | -0.22494800 | C                                            | 2.29673100 2.47514600 -0.60341800   |
| C  | -2.91922600 | -2.12117800 | 0.05757900  | C                                            | 2.78133300 3.74461200 -0.26515600   |
| C  | -5.24959900 | -1.83325400 | -0.65046600 | C                                            | 1.86851900 4.77268500 -0.01711700   |
| C  | -3.03974200 | -3.51086800 | -0.08603600 | H                                            | 3.85960400 3.89960800 -0.19095500   |
| H  | -1.97518200 | -1.67211900 | 0.38455400  | C                                            | 0.09021600 3.20698900 -0.47096800   |
| C  | -5.34635200 | -3.23086000 | -0.77830100 | C                                            | 0.50289100 4.51019600 -0.13179900   |
| C  | -4.25566900 | -4.06760000 | -0.50294900 | H                                            | 2.21411500 5.77497100 0.25458900    |
| H  | -2.17810300 | -4.15375300 | 0.12481900  | N                                            | 0.96776300 2.18987800 -0.68407500   |
| H  | -6.29766000 | -3.66624900 | -1.10597800 | Ir                                           | 0.33159700 0.05076800 -0.97705700   |
| H  | -4.35875000 | -5.15210900 | -0.61714000 | O                                            | -1.20212700 2.84996200 -0.62131000  |
| C  | -6.43755600 | -0.95019100 | -0.95881900 | C                                            | -2.20597400 3.83391300 -0.36296000  |
| H  | -6.76046800 | -0.37565800 | -0.07172500 | H                                            | -2.13478900 4.67860800 -1.07355800  |
| H  | -6.19407600 | -0.20945900 | -1.74145600 | H                                            | -2.13788200 4.21151000 0.67385700   |
| H  | -7.29607100 | -1.54739700 | -1.30703400 | H                                            | -3.16354200 3.31279400 -0.49559100  |
|    |             |             |             | H                                            | -1.29168800 0.59358200 -1.34463000  |
|    |             |             |             | H                                            | 0.48142500 0.11495300 -2.57493700   |
|    |             |             |             | I                                            | -0.35532400 -0.10753100 1.79810800  |
|    |             |             |             | H                                            | -0.00182100 -1.49814100 -1.16974600 |
|    |             |             |             | H                                            | -0.23087700 5.29789800 0.04420200   |
|    |             |             |             | H                                            | 3.71639000 1.54607600 -1.93496900   |
|    |             |             |             | H                                            | -3.70464300 -0.07379100 -2.22401500 |
|    |             |             |             | C                                            | -3.81145900 -1.08289600 -0.37226600 |
|    |             |             |             | C                                            | -2.62301800 -3.19106700 -0.17639200 |

### NMe\_oPh\_protonation\_TS\_face2

Zero-point correction= 0.661941  
(Hartree/Particle)  
Thermal correction to Energy= 0.705089  
Thermal correction to Enthalpy= 0.706034  
Thermal correction to Gibbs Free Energy= 0.583538

|   |             |             |             |
|---|-------------|-------------|-------------|
| H | -1.58715000 | -2.85432500 | 0.02470900  |
| H | -2.78923000 | -4.13753500 | 0.36815500  |
| C | -2.85120800 | -3.38037900 | -1.67971000 |
| H | -2.15849600 | -4.15318200 | -2.05549600 |
| H | -3.87965300 | -3.75661800 | -1.83539700 |
| C | -3.78152900 | -2.26235300 | 1.81061700  |
| H | -2.86956200 | -1.94886000 | 2.35856100  |
| H | -4.61055100 | -1.60007300 | 2.09621900  |
| H | -4.03770200 | -3.29894800 | 2.09054200  |
| N | -3.56103100 | -2.20035100 | 0.36962200  |
| C | -2.65395800 | -2.05201600 | -2.42797000 |
| H | -3.11864000 | -2.11289100 | -3.42964400 |
| H | -1.57285100 | -1.86669500 | -2.59143400 |
| C | -4.71011400 | -0.02766600 | 0.20135600  |
| C | -4.17214300 | 0.99932500  | 1.00095100  |
| C | -6.09996400 | -0.05513300 | -0.08588500 |
| C | -5.00236200 | 2.00563800  | 1.51705100  |
| H | -3.09831400 | 0.98781400  | 1.22796600  |
| C | -6.91105900 | 0.96562700  | 0.44338000  |
| C | -6.37503900 | 1.98974400  | 1.23627600  |
| H | -4.57377900 | 2.79252700  | 2.14707900  |
| H | -7.98567600 | 0.95128700  | 0.22712600  |
| H | -7.03183400 | 2.76909700  | 1.63750600  |
| C | -6.70415000 | -1.15251900 | -0.93231000 |
| H | -6.27406500 | -1.15986900 | -1.94979500 |
| H | -6.50704500 | -2.15057100 | -0.50183200 |
| H | -7.79576300 | -1.02883400 | -1.02203800 |

## Tunneling Probability

Probability of the particle to acquire enough energy to go over the barrier:

$$P_{Boltzmann} = \exp\left(-\frac{E_{act}}{RT}\right)$$

Probability of the particle to go through the barrier<sup>6</sup>:

$$P_{Gamow} = \exp\left(-\frac{2S}{\hbar}\right); S = \int_a^b \sqrt{2m(E - E_0)} dx$$

Where  $x$  is reaction coordinate;

Protonation molecular vibration can be associated with migration of proton; Mapping corresponding IRC curves in corresponding coordinates we get the width and shape of the barrier; Using triangular approximation of the barrier shape  $E(x)$  we can estimate  $P_{Gamow}$ ; At reaction temperature tunneling is unlikely to contribute significantly to the mechanism of proton transfer;

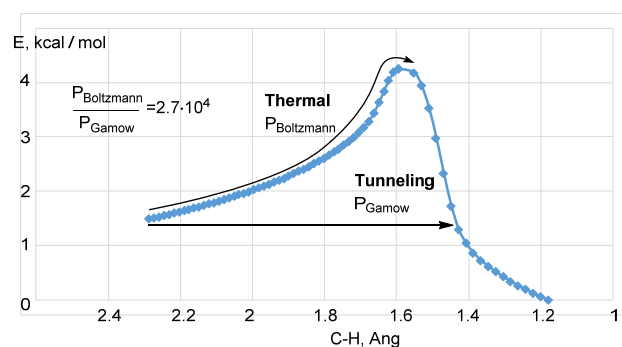

Face 1

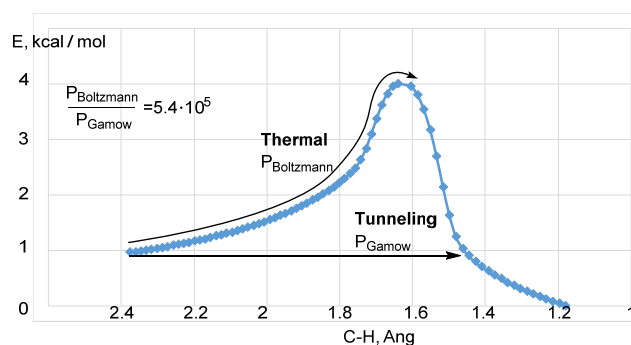

Face 2

<sup>6</sup> Skodje, R. T., Truhlar, D. G., Garrett, B. C. *J. Phys. Chem.*, **1981**, *85*, 3019.
